# Supplementary material for: Integrated Multi-Omics Analyses Reveal That Autophagy-Mediated Cellular Metabolism Is Required for the Initiation of Pollen Germination
Source: Int J Mol Sci. 2023 Oct 9;24(19):15014. doi: 10.3390/ijms241915014 (PMC10573924; doi:10.3390/ijms241915014)
Supplement: Supplementary file 1 [file ijms-24-15014-s001.zip]

Archive with 4 entries (4 files):
- Supplementary Data S1.xlsx
- Supplementary Data S2.xlsx
- Supplementary Data S3.xlsx
- Supplementary Material.pdf
