# Supplementary material for: Integrated Multi-Omics Analyses Reveal That Autophagy-Mediated Cellular Metabolism Is Required for the Initiation of Pollen Germination
Source: Int J Mol Sci. 2023 Oct 9;24(19):15014. doi: 10.3390/ijms241915014 (PMC10573924; doi:10.3390/ijms241915014)
Supplement: Supplementary file 1 [file ijms-24-15014-s001.zip › Supplementary Data S1.xlsx]

## Sheet: ATG2 VS WT Up
GeneID	WT-1	WT-2	WT-3	ATG2-1	ATG2-2	ATG2-3	log2(FC)	P Value	FDR
novel.8631	0	0.05	1.97	22.61	47.11	5.29	5.06989	0.000450804	0.0247442
GeneID:107830678	17.52	16.46	19.78	68.46	74.55	88.6	1.82314	1.05098e-64	1.80177e-60
novel.17758	0.73	0.67	1.97	3.44	4.12	5.64	1.76195	7.07436e-05	0.00612528
novel.15742	0.13	0.14	0.23	1.08	10.28	6.63	5.08125	1.42925e-08	6.02522e-06
GeneID:107810338	34.35	33.44	52.55	76.37	109.46	113.82	1.1046	6.59483e-12	5.9505e-09
novel.23169	1.62	1.41	1.46	4.18	4.57	5.67	1.47909	0.000806249	0.0378341
novel.21499	0.09	0.29	0.57	3.07	2.98	5.61	3.39639	6.91543e-09	3.3738e-06
novel.8918	1.41	0.67	0.62	5.01	5.9	7.4	2.59761	1.75043e-15	2.90408e-12
GeneID:107765726	114.3	119.65	265.45	395.74	573.36	632.81	1.43854	0.000336584	0.020168
novel.5679	3.82	2.5	1.03	10.35	10.19	10.18	1.90321	0.000154868	0.011348
GeneID:107794739	0	0	0	5.17	6.83	5.62	8.51164	2.23584e-12	2.21137e-09
novel.1411	0.15	0	0.23	3.29	3.04	2.25	4.72294	6.46997e-07	0.000156961
novel.25867	5.74	3.39	4.92	12.29	12.79	11.85	1.21304	3.71503e-05	0.00378107
novel.22917	0.06	0.06	0.06	43.62	4.8	0.06	8.15223	1.2421e-05	0.00169001
novel.21313	1.01	0.36	0.51	3.01	2.64	4.43	2.23136	4.13295e-05	0.00411144
GeneID:107790669	0.88	0.89	0.93	1.6	2.7	2.24	1.11937	3.47753e-05	0.0036097
novel.5443	0.06	0	0.16	2.45	2.93	2.4	5.08484	1.44861e-12	1.49007e-09
GeneID:107810652	16.67	18.03	22.12	38.79	49.12	46.45	1.07766	6.10784e-14	8.49007e-11
novel.2101	0.14	0.58	0.37	7.48	5.53	10.19	4.21915	5.3978e-12	5.141e-09
novel.24592	0.42	0.3	0.34	2.53	3.43	3.67	3.01076	2.96387e-13	3.81087e-10
GeneID:107771538	0.91	0.46	2.52	7.73	9.83	8.22	2.5828	3.68557e-05	0.00376844
GeneID:107808870	0.15	0.16	0.29	1.29	0.48	1.81	2.42385	0.000276596	0.0173483
GeneID:107785174	1.05	1.13	1.58	1.94	2.94	4.21	1.10558	1.50008e-05	0.00190967
GeneID:107760974	80.04	72.08	126.22	153.13	234.95	252.88	1.04994	0.000417426	0.0234489
novel.26534	1.78	1.22	1.55	3.36	4.17	4.8	1.25731	0.000129583	0.00991754
novel.18367	0.87	0.87	1.63	2.8	2.6	3.54	1.27129	3.93132e-10	2.5274e-07
GeneID:107817426	7.69	7.73	17.34	25.11	33.73	32.78	1.33698	0.00046026	0.0250902
GeneID:107812797	0.03	0.07	0.03	0.82	0.61	0.72	3.83827	1.15579e-05	0.00159794
GeneID:107763058	2.96	1.94	1.98	7.27	7.09	5.73	1.38215	9.8012e-06	0.00140024
novel.23745	0.93	0.33	2.15	5.41	6.8	7.79	2.3404	1.40157e-08	5.95737e-06
novel.230	0	0	0	5.43	8.12	8.26	6.03044	7.92973e-06	0.00120305
GeneID:107773875	0.99	1.55	1.41	4.12	4.61	5.31	1.61146	8.56531e-15	1.29565e-11
novel.14348	0.18	0	0.29	0.6	6.69	3.34	4.8686	0.000825005	0.0385035
GeneID:107809599	1.05	1.2	1.25	2.37	3.47	3.07	1.08616	0.000697337	0.0338986
GeneID:107790877	0.33	0.52	0.37	0.93	1.12	1.06	1.22302	0.000120844	0.00936631
novel.17809	2.28	1.04	2.49	4.38	8.19	6.36	1.4882	0.000666869	0.0327843
novel.1820	0	0	0.07	3.36	1.95	4.13	6.57725	1.45418e-07	4.61665e-05
novel.27091	0.65	0.9	0.77	4.7	7.55	5.13	2.80733	1.53832e-08	6.38044e-06
GeneID:107818462	4.58	4.09	7.35	9.87	12.93	14.03	1.05056	5.30471e-09	2.68117e-06
GeneID:107781051	1.46	1.08	1.53	3.29	3.38	3.9	1.2102	8.46677e-05	0.00697508
GeneID:107821001	2.23	2.36	6	7.75	10.03	13.47	1.32522	0.000323483	0.0195271
GeneID:107795696	1.32	1.05	2.4	4.67	6.67	6.19	1.69774	6.95348e-08	2.41638e-05
GeneID:107796168	0.68	0.57	0.99	2.43	2.79	2.33	1.59736	3.30956e-08	1.22456e-05
GeneID:107762015	49.44	36.94	71.91	103.46	170.28	128.59	1.13625	0.000741644	0.0355485
novel.16572	1.88	6.3	5.03	22	22.39	16.73	2.02138	1.12962e-07	3.72419e-05
GeneID:107788283	1.37	1.04	2.34	6.57	9.08	5.97	2.01795	1.58649e-12	1.5999e-09
GeneID:107796272	0.38	0.82	0.4	1.56	1.4	1.88	1.51003	5.5629e-06	0.000908271
GeneID:107793405	6.59	5.18	10.49	15.04	22.01	19.59	1.19147	4.70695e-10	2.98868e-07
novel.8542	0.19	0.16	0.37	2.06	2.28	1.51	2.8946	1.42884e-19	4.5929e-16
GeneID:107800802	1.17	0.37	1.05	3.41	2.85	3.13	1.66757	0.0011834	0.0492026
GeneID:107764026	2.45	1.71	2.16	6.49	5.67	4.1	1.21132	3.45096e-05	0.00359948
novel.7398	0.55	0.9	0.8	2.43	2	2.68	1.50904	1.36838e-05	0.00180454
GeneID:107769071	0.98	0.82	0.99	2.18	1.81	2.29	1.0095	7.04246e-07	0.000164837
novel.15073	3.83	2.23	5.34	8.74	9.87	8.34	1.05772	0.000387516	0.0221883
GeneID:107764582	0.02	0	0.06	0.31	0.31	0.27	3.20365	0.000825994	0.0385147
novel.4994	0.55	0.1	0.08	1.69	1.63	5.5	3.38704	3.57692e-06	0.000630016
GeneID:107816887	3.35	2.34	3.56	7.18	9.58	9.36	1.33134	1.19253e-10	8.63843e-08
GeneID:107810120	0.82	0.54	1.81	1.97	2.98	2.77	1.13235	0.000846135	0.039205
GeneID:107803985	2.72	3.12	3.33	6.9	8.95	7.71	1.19828	5.30892e-08	1.89613e-05
GeneID:107788353	10.72	8.35	15.05	23.69	34.91	28.92	1.19091	2.24701e-11	1.9261e-08
novel.8485	0.13	0	0.29	2.37	4.14	1.76	4.31083	7.94815e-07	0.000181681
GeneID:107807082	3.12	5.22	5.57	7.86	12.68	11.02	1.02287	7.21089e-07	0.000167811
novel.24077	2.18	1.55	3.08	4.38	6.06	4.87	1.01024	2.33119e-05	0.00267624
GeneID:107824499	0.33	0.43	0.27	0.65	0.85	1.01	1.15304	0.0011939	0.0495191
GeneID:107789479	0.56	0.7	1.22	3.18	2.59	3.47	1.73137	0.000209877	0.0140831
novel.8259	0.32	0	0	9.6	6.82	4.03	5.67395	1.59425e-05	0.00198053
novel.25428	0.44	0.24	0.67	1.82	2.31	2.75	2.15766	3.21513e-05	0.00341648
GeneID:107783020	0	0	0	0.31	0.27	0.24	5.08507	0.00062998	0.0316411
novel.14	21.42	18.33	22.97	98.1	165.69	61.52	2.24141	5.3174e-09	2.68117e-06
GeneID:107784300	0	0.05	0	0.67	0.7	0.59	5.0955	0.000137554	0.0104129
GeneID:107774324	1.14	0.88	1.31	2.21	3.09	2.23	1.02769	0.000514584	0.027256
GeneID:107768767	0.7	0.48	0.69	1.51	1.42	1.63	1.13346	0.00109434	0.0466305
novel.9870	1.65	2.28	2.37	9.5	8.71	13.1	2.09399	9.98217e-09	4.4258e-06
novel.13393	0.13	0.3	0.3	11.32	17.05	10.5	6.35588	6.03686e-13	7.0564e-10
novel.17075	0	0	0	0.85	2.21	2.08	5.16793	0.000503974	0.0268322
novel.21061	0.08	0.34	0.43	1.63	2.86	4.01	3.13705	2.55809e-07	7.47529e-05
GeneID:107792715	0.81	1.35	1.91	2.7	4.38	3.86	1.26282	4.29851e-05	0.00418706
novel.6940	1.6	1.91	3.31	6.58	8.89	5.35	1.43944	1.29638e-05	0.0017318
GeneID:107813427	22.92	23.85	17.49	40.06	46.79	86.1	1.11787	8.96289e-07	0.000200422
GeneID:107787797	3.6	3.94	5.7	7.29	10.29	14.17	1.08165	1.00012e-05	0.00142486
GeneID:107811789	0.45	0.36	0.31	1.33	1.81	1.5	1.92054	9.24037e-12	8.19382e-09
novel.22790	0	0.11	0.1	1.93	3.62	2.19	5.18829	5.13542e-17	1.05648e-13
GeneID:107794435	0.18	0.06	0.22	0.88	1.12	1.48	2.71506	0.00017149	0.0121991
GeneID:107820706	47.78	47.43	92.05	123.75	194.58	193.06	1.30062	0.00027433	0.0172482
GeneID:107771170	0.57	0.23	0.77	1.31	2.11	2.63	1.78528	0.00065146	0.032341
novel.26716	0.22	0.11	0.24	0.93	0.8	0.87	2.08691	0.000346691	0.020495
GeneID:107761590	1.04	1.31	1.34	2.66	4.23	4.48	1.46601	4.52637e-08	1.62794e-05
GeneID:107787830	10.93	11.01	21.33	27.78	39.28	46.27	1.24301	0.000420073	0.023509
GeneID:107762306	0.15	0.24	0.16	0.41	0.51	0.79	1.46863	0.000663792	0.0327007
GeneID:107766878	0.26	0	0.47	2.42	3.64	2.28	3.27419	3.18938e-05	0.00340673
novel.292	0.49	1.37	0.71	3.17	2.57	3.84	2.00411	2.54302e-08	9.83386e-06
novel.11922	0.32	0.46	0.36	1.7	0.76	1.68	1.72796	0.000164276	0.0118166
novel.6186	5.65	3.86	5.87	10.23	12.22	12.64	1.0273	1.4189e-07	4.53265e-05
novel.3833	0	0.49	0.36	5.22	10.02	2.65	4.93905	2.70963e-05	0.00304277
GeneID:107804307	3.54	2.9	3.95	10.99	6.51	10.3	1.24249	1.74363e-05	0.00211004
GeneID:107762386	1.84	1	1.51	4.65	4.2	4.25	1.29454	2.50711e-05	0.00286541
GeneID:107764675	1.29	1.12	1.81	3.84	4.2	3.26	1.27613	3.30211e-06	0.000590958
GeneID:107783710	16.62	15.75	17.68	32.64	46.5	60.71	1.14473	8.914e-06	0.00130614
GeneID:107790241	0.6	0.52	0.88	2.42	3.45	2.55	1.91332	1.53465e-08	6.38044e-06
GeneID:107779796	2.54	2.54	4.37	5.62	7.81	9.41	1.11858	1.70999e-07	5.29798e-05
novel.5680	1.89	2.63	1.32	4.22	4.13	5.96	1.15382	5.44239e-05	0.00502527
novel.124	0	0.05	0.08	0.59	1.25	1.13	4.3276	1.08123e-05	0.00151936
novel.23276	6.56	7.17	6.37	19.57	21.99	43.43	1.81164	1.56376e-15	2.68085e-12
GeneID:107830403	1.96	1.76	1.77	3.74	4.31	4.97	1.0701	0.000784887	0.0371367
novel.21052	0.16	0.26	0.22	1.78	1.22	2.24	2.88185	4.1956e-05	0.00414426
GeneID:107823752	2.3	1.91	2.7	4.05	5.59	6.63	1.07492	2.23063e-06	0.000436212
GeneID:107801262	2.25	3.55	6.23	9.97	11.2	13.19	1.2698	0.00064388	0.0321509
novel.17856	0	0.24	0.21	2.82	7.09	13.35	5.38526	2.31555e-06	0.00044771
novel.8584	0.49	0.53	0.45	1.35	1.5	1.33	1.37445	1.69717e-07	5.29798e-05
novel.9876	1.25	0.4	1.23	6.22	7.2	4.32	2.54055	2.58693e-08	9.92899e-06
novel.2200	0	0	0	2.17	1.72	1.59	5.62296	6.0715e-05	0.00546282
novel.25139	0.27	0.19	0.2	8.43	10.92	6.86	5.21257	6.6724e-80	1.71584e-75
GeneID:107768660	0.2	0.16	0.27	1.56	1.74	1.69	2.81996	9.48509e-13	1.05637e-09
novel.21700	0.64	0	0	8.48	7.09	4.35	4.67291	0.000937025	0.0422614
novel.18561	28.42	23.19	25	104.21	194.23	60.82	2.07135	8.1645e-06	0.00122422
GeneID:107825749	1.62	2.01	2.53	65.88	77.09	79.84	5.6237	1.16235e-159	5.97807e-155
novel.25389	1.88	0.87	3.22	4.81	5.66	5.48	1.25237	4.64926e-05	0.00446112
GeneID:107777858	16.7	15.16	21.75	31.61	46.84	41.43	1.00199	9.65355e-13	1.05637e-09
GeneID:107815813	0	0.08	0.07	1.27	1.59	0.16	4.21274	0.000901814	0.0410817
GeneID:107781634	0.06	0.16	0.03	1.31	0.99	1.05	3.70023	6.44279e-09	3.18615e-06
GeneID:107812165	32.06	27.32	45.25	64.45	104.21	101.68	1.21164	4.88502e-06	0.00081308
novel.15373	0	0	1.27	24.15	26.56	23.63	5.5108	1.4765e-09	8.43755e-07
GeneID:107761179	81.41	75.29	115.88	207.59	240.77	230.46	1.10876	3.79445e-17	8.48488e-14
GeneID:107779968	1.97	1.81	3.17	5.07	6.34	6.83	1.23679	1.08991e-07	3.61646e-05
novel.16717	0.51	0.61	0.57	2.15	1.88	1.51	1.56802	0.000482602	0.0260283
GeneID:107765242	8.21	5.92	10.43	23.18	24.88	18.59	1.28319	6.00945e-13	7.0564e-10
novel.9759	0.35	0.35	0.46	1.15	0.76	2.14	1.65553	5.42891e-06	0.000889217
GeneID:107823473	0.13	0.17	0.23	0.57	0.74	0.68	1.78802	5.76715e-11	4.36192e-08
novel.18767	0.46	0.65	0.89	8.73	12.33	6.7	3.67345	1.27898e-30	8.22239e-27
novel.18962	0.64	0.34	1.38	3.33	4.13	2.17	1.85547	8.37885e-05	0.00691706
GeneID:107793670	0.18	0.1	0.15	0.41	0.35	0.59	1.52544	7.1035e-05	0.00613654
novel.25857	0.98	0.8	0.89	2.11	2.63	3.45	1.18896	0.000964441	0.042954
novel.16613	1.19	0.79	0.27	2.4	6.12	2.63	2.13416	0.000675234	0.0330428
novel.24301	5.71	4.63	7.91	17.52	18.51	15.95	1.33989	3.73285e-11	3.04737e-08
novel.24660	0	0	0	1.12	8.29	4.06	7.46656	7.35315e-06	0.00114254
GeneID:107782115	0.67	1.07	2.41	3.09	3.6	5.06	1.33478	0.00110948	0.0471195
GeneID:107774817	0.03	0	0.03	3.85	3.31	5.87	7.6436	3.5863e-13	4.49871e-10
novel.20836	0.72	0.33	0.93	2.28	2.76	2.61	1.76452	0.000980691	0.0435185
GeneID:107817868	1.51	1.69	2.86	5.05	5.84	7.23	1.40639	8.25463e-07	0.000187851
GeneID:107811092	3.39	0.64	6.84	27.96	19.51	29.24	2.65449	0.000760654	0.036379
novel.19472	0.26	0.14	0.24	0.96	1.45	1.49	2.41985	0.00030274	0.018492
GeneID:107790214	467.1	424.9	632.94	980.76	1457.92	1260.95	1.0551	3.0386e-06	0.000558136
GeneID:107821631	0.16	0	0	0.82	3.73	2.83	5.14885	0.000172315	0.0122408
GeneID:107827569	24.77	22.69	44.54	65.82	96.11	77.26	1.20027	0.00019093	0.0131615
GeneID:107794211	1.99	1.99	3.52	5.84	6.9	5.58	1.13497	2.33808e-07	6.91091e-05
novel.1128	1.58	1.85	2.21	3.43	4.62	5.05	1.04036	0.000793001	0.037383
novel.26190	76.58	55.14	87.02	431.11	773.29	173.58	2.46301	0.00093476	0.0422087
GeneID:107828342	4.82	5.99	11.2	13.89	22.4	24.91	1.2506	9.30177e-06	0.0013476
GeneID:107802230	12.53	11.65	21.07	43.43	55.31	57.28	1.54198	4.26327e-13	5.22058e-10
novel.6660	0.72	0.22	0.83	2.2	2.25	3.58	1.97269	0.000402265	0.0228103
novel.19320	0.88	1.23	1.46	2.64	2.85	2.03	1.10587	0.000563359	0.0289163
novel.11284	0	0	0	15	8.62	9.48	5.51651	0.000121319	0.00938278
novel.3055	21.02	19.43	36.43	52.15	82.47	94.15	1.39337	4.18508e-05	0.00414426
novel.17743	0.46	0.49	0.83	2.97	2.56	2.41	1.98404	0.000114835	0.00900054
novel.5938	0.96	0.61	1.73	5.15	7.91	6.45	2.36847	6.44398e-10	4.04171e-07
novel.22168	3.45	2.36	4.09	10.01	11.87	9.77	1.51403	1.45806e-13	1.92281e-10
GeneID:107785919	2.99	1.7	3.83	5.8	7.27	6.61	1.04629	8.99047e-06	0.00130988
GeneID:107775210	53.59	50.51	96.68	118.87	190.05	281.9	1.33683	0.0010158	0.0444626
GeneID:107804975	4.35	5.05	11.1	16.96	22.59	28.63	1.59314	0.000305417	0.0186333
novel.27750	0.15	0	0.11	3.46	3.61	2.09	5.87717	4.86843e-06	0.000812948
novel.14758	0.11	0	0.2	1.26	1.75	1.17	3.54091	0.000803354	0.0377672
novel.8123	0	0	0	10.78	11.56	5.05	5.70595	6.7117e-05	0.00591078
novel.1723	0.4	0.1	0.51	4.05	3.84	4.89	3.53433	6.30259e-12	5.78837e-09
novel.22078	0.08	0.26	0.27	7.5	10.67	6.63	5.25433	1.74218e-31	1.28003e-27
novel.25679	1.44	1.2	1.6	2.4	7.45	6.17	1.72934	1.01864e-05	0.00144007
GeneID:107776898	3.3	3.18	3.77	7.71	8.43	8	1.08965	4.82372e-17	1.0337e-13
GeneID:107780742	0.45	0.47	0.91	2.01	3.39	2.12	1.84185	2.50414e-06	0.000477232
novel.27733	0.21	0.2	0.2	5.67	6.09	5.51	4.79647	1.85335e-33	1.9064e-29
novel.21879	0.16	0.03	0.4	4.7	5.16	3.08	4.30962	1.62824e-08	6.69937e-06
novel.205	0.5	0.42	0.1	1.45	2.97	0.97	2.29417	4.29334e-05	0.00418706
novel.27375	1.81	1.27	1.29	15.1	15.67	8.24	3.04555	4.54184e-11	3.53926e-08
novel.13448	0.32	0.18	0.59	1.93	3.02	2.26	2.63592	3.83543e-07	0.000103277
novel.26279	0	0.16	0	1.63	2.92	2.67	5.28361	6.57193e-05	0.00580757
GeneID:107777524	13.72	13.12	14.77	33.13	30.07	35.85	1.09435	2.7412e-19	8.29311e-16
novel.26493	0	0	0	0.49	3.17	0.51	8.05512	1.01107e-05	0.00143648
GeneID:107771517	2.4	2.16	3.78	5.68	6.93	6.63	1.01485	0.00103325	0.0447879
GeneID:107775768	2.51	2.5	3.44	13.18	10.14	14.88	2.01151	2.8219e-12	2.73837e-09
novel.14582	0.35	0.18	0.11	8.4	10.39	5.02	5.18005	1.29386e-12	1.35805e-09
novel.912	3.23	3.45	3.46	7.26	8.9	7.99	1.08202	1.28029e-05	0.00172373
novel.20832	1.46	1.11	1.85	3.8	6.12	4.75	1.56896	1.1476e-10	8.43171e-08
novel.9969	0.48	0.17	0.62	3.52	4.55	4.87	3.17127	1.11134e-31	9.52621e-28
novel.21094	1.43	0.61	1.94	3.78	3.92	3.31	1.31497	0.000106061	0.00847022
GeneID:107816051	0	0.1	0.08	2.31	2.06	3.35	5.20198	3.35133e-06	0.000594353
GeneID:107820337	1.23	2.1	4.79	5.88	10.59	14.52	1.71479	7.80892e-06	0.00118823
novel.13959	0.17	0.38	0.53	6.97	6.49	4.11	3.98221	1.73376e-18	4.69311e-15
novel.16	54.21	47.39	56.59	242.61	424.33	152.65	2.2125	1.07802e-07	3.60025e-05
GeneID:107778101	0.91	0.94	1.62	3.59	5.16	4.23	1.73908	4.34256e-11	3.48972e-08
GeneID:107822308	0.16	0.35	0.33	1.08	1.08	1.08	1.80451	9.71939e-05	0.00787209
novel.21201	1.18	2.03	1.99	6.44	6.92	4.54	1.60953	0.000141335	0.0105808
GeneID:107815789	0	0	0	1.57	0.98	1.77	5.56267	8.11785e-05	0.00673402
novel.24912	0.15	0	0	1.9	3.34	1.03	5.0975	0.000188227	0.013082
novel.26491	0	0	0	0.41	1.77	0.34	7.27932	1.21567e-05	0.00166285
GeneID:107792078	8.03	8.09	16.64	20.96	30.5	34.64	1.24979	0.000946793	0.0424983
GeneID:107776966	1.18	1	2.02	2.72	4.57	3.24	1.15665	0.000889849	0.0406808
novel.25138	0	0	0	3.98	2.27	2.97	6.56386	5.03495e-07	0.000128194
GeneID:107810697	27.24	25.71	43.44	53.36	80.33	81.78	1.01443	0.000266982	0.0168895
novel.301	0.25	0	0.33	2.19	1.7	1.21	2.94922	1.93586e-08	7.71809e-06
novel.21871	2.19	1.4	1.48	6.64	5.35	4.91	1.56268	2.57876e-05	0.00291491
novel.8484	0	0	0	2.52	3.63	3.96	7.44181	2.44743e-09	1.35348e-06
GeneID:107821177	4.98	7.8	14.95	25.24	35.43	35.1	1.64081	0.00028166	0.0175588
novel.11980	4.35	5.58	9.36	14.49	21.24	22.55	1.41869	2.32196e-10	1.61379e-07
GeneID:107775609	4.16	4.44	5.4	7.47	10.44	15.33	1.04439	0.000107329	0.00855817
novel.3244	0.45	0.19	0.4	3.76	3.98	3.15	3.24516	1.23642e-28	7.06558e-25
novel.7488	0.06	0.31	0.41	1.88	2.27	2.21	2.86628	1.29201e-07	4.15307e-05
GeneID:107803426	4.54	5.4	8.94	11.53	14.1	18.87	1.06292	2.07927e-06	0.000408164
novel.19622	0	0.24	0.52	2.07	2.37	2.33	2.41339	0.000223855	0.0147415
novel.26998	0.52	0.23	0.23	2.71	4.17	2.59	3.2645	3.03537e-07	8.4385e-05
novel.1252	3.83	3.84	2.62	25.59	41.74	14.87	2.82278	3.26104e-07	8.92121e-05
GeneID:107794811	2.37	3.07	2.22	4.68	5.74	9.24	1.18143	4.69826e-05	0.00449974

## Sheet: ATG2 VS WT Down
GeneID	WT-1	WT-2	WT-3	ATG2-1	ATG2-2	ATG2-3	log2(FC)	P Value	FDR
GeneID:107785622	1.01	1.87	1.32	0.24	0.38	0.57	-1.99527	1.15305e-06	0.000246069
novel.23000	3.68	2.42	3.94	1.14	1.86	2.13	-1.14385	0.000238155	0.0155342
novel.15412	254.65	249.32	399.61	139.89	159.86	182.46	-1.47467	1.88038e-06	0.000376302
novel.2586	3.35	4.13	3.64	2.32	0.28	1.66	-1.53297	0.000686273	0.0333924
GeneID:107773377	2.82	2.82	3.08	1.23	1.25	0.66	-1.60761	9.57924e-06	0.00137234
novel.25240	2.33	2.39	4.04	1.4	0.85	2.23	-1.11189	0.000114976	0.00900054
novel.27023	7.17	0	0	0	0	0	-21.6889	2.90489e-08	1.09593e-05
GeneID:107762260	2.14	1.14	1.58	0.77	0.5	0.92	-1.30607	0.000257956	0.0164529
GeneID:107779114	0.98	0.89	0.83	0.32	0.33	0.66	-1.20603	0.000798304	0.0375985
GeneID:107787648	0.05	0.16	0.02	0	0	0	-5.51716	0.000365782	0.0213796
GeneID:107770502	2.54	3.89	2.22	1.39	1.55	1.7	-1.05262	1.37972e-05	0.00181022
GeneID:107787250	5	2.51	5.53	1.57	0.33	1.63	-2.05635	1.65455e-06	0.000336345
GeneID:107776231	1.32	1.45	1.22	0.76	0.74	0.64	-1.08987	5.96293e-05	0.00540643
GeneID:107794533	0.61	0.41	0.48	0.1	0.25	0	-2.29105	0.00032634	0.0196764
novel.842	7.97	9.62	6.83	2.86	3.69	2.75	-1.57281	6.08145e-07	0.000149653
GeneID:107814657	1.76	0.68	0.49	0.3	0.04	0.25	-2.46217	0.000375136	0.0217444
GeneID:107801185	1.21	1.35	1.19	0.35	0.45	0.58	-1.59775	2.00874e-06	0.000398886
GeneID:107784440	2.61	2.8	2.02	0.88	0.65	1.31	-1.56687	6.90329e-05	0.00604843
novel.7451	2.99	3.47	3.67	1.15	1.6	1.33	-1.50144	0.00116617	0.048762
novel.1620	1.18	0	0	0	0	0	-22.2424	1.2689e-08	5.53059e-06
novel.2011	1.28	1.38	1.67	0.47	0.22	0.21	-2.38192	4.02569e-06	0.000697122
GeneID:107770226	2.36	2.84	2.23	0.88	0.59	0.92	-1.7897	0.000234626	0.015372
GeneID:107786229	46.95	54.76	31.12	9.69	10.83	11.04	-2.23428	6.39512e-17	1.26503e-13
GeneID:107800217	0.81	0.24	0.15	0.02	0.03	0.06	-3.56292	0.000440077	0.0243788
novel.10541	2.74	3	2.54	1.63	1.06	1.61	-1.0943	0.000317893	0.019308
GeneID:107765134	5.3	3.31	1.84	0.61	0.6	1.3	-2.27504	2.27437e-06	0.00044308
GeneID:107824130	2.81	1.14	0.7	0.6	0.24	0.46	-1.99209	5.51375e-05	0.00506389
GeneID:107797755	16.47	21.97	17.39	10.37	7.09	10.25	-1.15738	9.20017e-06	0.00133665
GeneID:107830368	1.85	1.7	1.11	0.45	0.13	0.34	-2.49237	4.72766e-09	2.43148e-06
GeneID:107763692	16.32	12.32	20.45	8	7.53	8.91	-1.14877	8.81892e-10	5.27402e-07
novel.6353	2.93	3.53	2.58	1.33	1.38	2.33	-1.00577	0.000116382	0.00908294
GeneID:107788879	53.45	19.47	21.92	6.46	7.08	12.76	-2.05372	0.000190959	0.0131615
GeneID:107795870	11.89	11.69	16.22	8.27	6.56	7.39	-1.008	1.323e-06	0.000275478
novel.12045	1.25	0.91	0.61	0.19	0.33	0.31	-1.91352	9.45958e-06	0.00136279
GeneID:107796891	6.57	8.06	3.83	1.78	0.79	2.49	-2.07548	1.74944e-07	5.38774e-05
GeneID:107784792	22.39	23.97	19.17	9.49	8.71	18.99	-1.03567	4.78323e-06	0.000803942
novel.8543	2.31	2.26	2.67	1.17	0.53	1.18	-1.48113	5.02619e-05	0.00471719
GeneID:107827292	13.53	14.06	13.59	6.41	5.04	5.57	-1.42668	1.77102e-17	4.14023e-14
GeneID:107805711	1.92	1.02	0.28	0.21	0.23	0.31	-2.28828	8.88166e-05	0.00725068
novel.21386	9.06	8.86	10.61	4.01	5.95	6.92	-1.05844	3.08127e-06	0.00056396
GeneID:107792483	0.6	0.91	0.6	0.28	0.26	0.36	-1.38331	0.000222024	0.0146396
GeneID:107794980	1.34	0.65	0.83	0.19	0.26	0.31	-2.19351	0.00100304	0.044243
GeneID:107810466	1.51	2.21	1.26	0.09	0.1	0.37	-3.44604	7.31845e-05	0.00628373
GeneID:107814475	12.62	12.86	12.65	6.46	6.11	7.2	-1.09642	1.43123e-18	4.08943e-15
novel.20386	9.75	8.67	5.13	4.65	4.71	2.78	-1.14344	0.00101238	0.0444549
GeneID:107830041	1.36	1.29	1.01	0.1	0.07	0.08	-3.98449	5.34975e-34	6.87857e-30
novel.7288	4.1	3.96	4.92	1.67	1.02	1.62	-1.73273	1.45056e-14	2.07233e-11
GeneID:107825243	3.24	4.95	2.86	1.42	1.63	1.87	-1.33762	4.81588e-06	0.000806794
GeneID:107819048	20.39	15.9	13.75	9.13	5.34	8.07	-1.34144	1.90757e-08	7.66469e-06
GeneID:107801516	73.61	27.22	26.48	7.98	5.62	16.32	-2.29783	0.000400107	0.0227632
GeneID:107815217	3.44	3.46	1.72	1.18	1.45	1.52	-1.20717	4.14175e-06	0.000712423
GeneID:107766126	9.17	10.68	8.85	2.91	2.44	4.4	-1.68352	2.89603e-09	1.54286e-06
GeneID:107775918	12.09	6.94	5.43	2.83	1.12	4.32	-1.80957	2.00818e-05	0.00235789
GeneID:107831394	1.04	0.49	0.29	0	0.12	0.09	-3.35476	0.00028788	0.01786
GeneID:107827108	1.26	2.42	1.47	0	0.11	0.05	-5.19382	3.28262e-10	2.19451e-07
GeneID:107777338	1.34	0.69	0.58	0.28	0.06	0.1	-2.66319	1.37502e-05	0.00180866
GeneID:107760609	1.92	1.03	0.65	0.42	0.05	0.43	-2.17405	0.000856283	0.0395015
novel.11066	2.53	2.91	2.44	1.59	0.63	1.6	-1.18499	1.41846e-05	0.00182792
novel.24322	27.11	24.76	27.85	11.62	12.89	16.08	-1.11944	2.783e-23	1.19277e-19
novel.3640	3.16	4.71	4.44	0.08	0.04	0	-6.88131	5.04022e-24	2.35658e-20
GeneID:107762570	3.03	2.54	2.66	1.5	1.42	1.55	-1.02557	2.22288e-07	6.64681e-05
novel.15368	0	0.97	0	0	0	0	-21.6955	2.87687e-08	1.09593e-05
GeneID:107767940	1.84	2.21	2.21	0.3	0.75	0.61	-2.07699	6.90341e-08	2.4153e-05
novel.25841	15.83	20.01	20.52	10.37	9.16	11.2	-1.01877	4.00902e-16	7.63658e-13
novel.6428	8.18	4.05	1.14	1.08	1.07	1.39	-2.13068	0.000206969	0.0139693
GeneID:107784534	3.49	1.54	1.49	0.87	0.5	1.03	-1.59662	1.62075e-05	0.0020086
novel.8575	4.89	5.3	4.37	1.38	1.59	1.33	-1.90988	5.1729e-15	8.06205e-12
GeneID:107802378	18.94	18.9	21.39	14.55	7.58	10.31	-1.01688	2.12662e-07	6.39614e-05
novel.13435	11.66	10.22	7.61	3.02	5.1	6.12	-1.2976	0.000146037	0.0108692
novel.23513	3.05	2.71	3.56	0.98	0.86	1.38	-1.74501	0.000327594	0.0197289
novel.17878	1.39	0.95	1	0.33	0.45	0.72	-1.32049	0.00048095	0.0260102
GeneID:107772591	37.46	23.97	9.62	6.72	4.49	10.4	-2.04758	5.29606e-07	0.00013352
GeneID:107797956	61.01	55.15	47.92	18.52	15.12	27.83	-1.62807	1.24e-20	4.55533e-17
GeneID:107801037	7.02	7.67	6.61	3.67	3.8	3.28	-1.13316	6.85957e-11	5.11297e-08
GeneID:107829087	13.7	11.56	14.23	1.87	2.78	3.65	-2.36918	1.90063e-26	9.77511e-23
novel.13040	4.97	5.58	4.6	2.12	1.51	2.56	-1.49445	0.000120924	0.00936631
GeneID:107774099	1.48	2.14	1.88	0.95	0.9	1.1	-1.07066	0.00107617	0.0461236
GeneID:107808257	5.34	2.2	1.95	0.85	0.47	1.22	-2.08272	6.75762e-07	0.000162407
GeneID:107773497	0.77	1.8	0.92	0.08	0.06	0.18	-3.66057	5.44461e-09	2.71866e-06
GeneID:107777766	2.07	1.21	0.86	0.28	0.31	0.64	-1.95154	9.30941e-05	0.00757582
GeneID:107815999	3.75	1.99	2	0.77	0.47	0.87	-2.04362	2.44815e-07	7.19491e-05
novel.8435	5.16	5.88	3.57	0	0	0	-8.69174	1.16659e-12	1.24997e-09
GeneID:107778186	3.76	4.94	3.97	2.75	2.01	2.11	-1.05463	0.000259516	0.0165113
GeneID:107831910	2.53	3.09	2.3	1.22	1.21	1.46	-1.19047	0.000556402	0.0287891
GeneID:107806091	5.04	6.09	6.17	3.58	2.15	3.56	-1.04285	7.38136e-07	0.000170238
GeneID:107827339	8.63	3.7	2.36	1.54	1.23	1.37	-1.99255	0.000792342	0.037383
GeneID:107827620	3.28	3.57	2.58	1.43	1.33	1.19	-1.40015	2.95656e-06	0.000546975
GeneID:107812013	1.05	1.39	0.96	0.22	0.34	0.33	-2.10419	3.29739e-08	1.22456e-05
GeneID:107821713	2.67	0.69	0.54	0.5	0.17	0.4	-2.02789	0.00111967	0.0475131
GeneID:107770659	83.8	91.58	57.97	37.74	35.56	32.89	-1.28853	6.96942e-09	3.3738e-06
GeneID:107813596	13.35	13.79	10.7	5.23	5.86	5.41	-1.35011	4.23822e-22	1.67674e-18
GeneID:107817358	0.37	0.14	0.12	0	0	0.02	-4.95204	0.000561615	0.0288889
novel.22493	3.49	3.61	3.34	0	0.35	0.22	-4.44287	3.37085e-10	2.19451e-07
GeneID:107796747	0.84	0.6	0.65	0.03	0.03	0.16	-3.45775	1.27851e-05	0.00172373
novel.10542	5.02	3.57	5.3	1.25	2.02	2.68	-1.40046	1.70028e-07	5.29798e-05
novel.1486	5.42	4.2	5.32	1.62	2.31	0.84	-1.7979	7.60533e-10	4.65654e-07
novel.10001	2.19	0.9	1.71	0.31	0	0.54	-2.68632	0.000463602	0.0252046
GeneID:107829691	2.27	0.24	0.34	0.06	0.13	0.08	-3.61369	0.000685828	0.0333924
GeneID:107781132	0.47	0.7	0.2	0.08	0.06	0.07	-2.793	0.000860729	0.0396313
novel.17724	1.37	1.15	2.03	0.08	0.25	0.62	-2.54293	0.000434686	0.0241952
GeneID:107779998	1.82	0.5	0.43	0.09	0.15	0.3	-2.56769	0.000964629	0.042954
novel.14127	5.87	8.19	6.46	1.7	3.36	2.83	-1.55233	6.98695e-10	4.32947e-07
GeneID:107812074	0.89	0.69	0.31	0.11	0.08	0	-3.32785	0.000299227	0.0183427
GeneID:107822079	8.39	4.77	4.43	2	0.97	4.45	-1.50027	0.000728169	0.0349678
GeneID:107760551	0.88	1.18	0.76	0.35	0.27	0.42	-1.57833	7.29228e-07	0.000168941
GeneID:107801867	1.18	1.04	0.88	0.2	0.32	0.23	-2.19971	1.11984e-17	2.74547e-14
GeneID:107804601	0.39	0.18	0.09	0	0	0	-5.54728	0.000243645	0.0157423
novel.19726	0.53	0.42	0.42	0.22	0.06	0.1	-1.94742	0.00114813	0.0481906
novel.1113	15.21	14.29	21.71	0.4	0.43	0.32	-5.66809	1.56281e-15	2.68085e-12
novel.1021	31	24.85	34.29	10.01	22.14	8.24	-1.37929	0.000151401	0.0111557
GeneID:107765840	1.6	0.78	0.39	0.21	0.07	0.29	-2.45435	1.41898e-05	0.00182792
novel.719	1.77	1.72	1.66	0.77	0.52	0.85	-1.43392	0.000569666	0.0291818
GeneID:107829106	4.51	6.55	3.08	2.29	1.52	3.04	-1.22494	0.00014071	0.0105618
GeneID:107824378	22.47	22.33	20.95	12.36	8.24	11.61	-1.34431	0.000394421	0.0225394
GeneID:107809197	3.61	2.33	2.57	1.26	1.74	1.17	-1.16684	0.000190955	0.0131615
GeneID:107769127	2.75	2.47	2.62	1.09	0.49	0.66	-1.94847	1.70938e-06	0.000346122
GeneID:107793862	5.68	5.61	5.45	2.8	3.26	2.95	-1.04636	5.96242e-12	5.57551e-09
GeneID:107777414	6.8	8.27	5.02	4.25	3.6	3.28	-1.02801	2.31387e-05	0.00266827
novel.9498	5.97	7.89	8.4	2.2	3.01	6.29	-1.18284	0.000356979	0.0210148
novel.18899	0.62	0.93	0.63	0.12	0.14	0.4	-1.88535	0.000264349	0.0167435
GeneID:107770883	9.89	10.1	11.77	3.87	3.87	5.45	-1.42303	6.25214e-20	2.14369e-16
GeneID:107813008	0.63	0.41	0.48	0.11	0.16	0.19	-1.88978	0.0010581	0.045769
GeneID:107792964	2.41	2.03	1.82	0	0	0	-6.06379	1.31394e-05	0.00174618
GeneID:107784918	2.19	4.15	6.04	0.31	0.5	0.35	-3.51707	1.65236e-10	1.18031e-07

## Sheet: ATG5 VS WT Up
GeneID	WT-1	WT-2	WT-3	ATG5-1	ATG5-2	ATG5-3	log2(FC)	P Value	FDR
GeneID:107785874	5.54	4.67	5.35	8.45	11.65	16.61	1.49324	2.95555e-11	5.70951e-10
novel.14081	0.9	1.2	1.62	3.32	3.45	5.7	2.15453	1.3809e-06	1.49981e-05
novel.6421	2.03	2.72	0	7.54	3.87	3.79	2.23584	0.00843153	0.0404949
novel.16007	0	0	0	5.84	13.55	17.39	5.36266	0.000733172	0.00477722
GeneID:107800246	0.96	0.96	1.66	2.33	3.6	3.68	1.78825	1.0178e-09	1.68097e-08
novel.17227	3.29	5.69	2.92	6.99	7.55	13.13	1.34455	6.63792e-05	0.000543258
novel.1643	14.08	12.99	18.38	56.05	76.98	79.23	2.60943	1.14925e-74	3.62295e-72
GeneID:107782814	5.64	5.19	6.01	10.64	9.21	10.92	1.29762	5.19144e-07	6.02095e-06
GeneID:107824333	0	0	0.06	0.36	0.62	0.11	4.32152	0.00607332	0.0305625
GeneID:107822714	1253.31	1252.86	1214.25	2250.43	1845.87	1817.48	1.04787	4.71197e-21	1.95611e-19
GeneID:107782385	243.49	233.23	238.72	616.39	877.74	916.21	2.11555	1.26205e-75	4.16056e-73
GeneID:107769787	119.07	123.16	127.64	215.79	220.6	229.83	1.26429	3.12772e-45	4.31035e-43
GeneID:107779422	0.68	0.66	0.65	2	2.09	1.94	1.97232	3.62626e-09	5.57977e-08
GeneID:107829300	0.2	0.05	0.08	0.56	0.39	0.49	2.51783	4.76891e-05	0.000401299
novel.7748	13.72	9.66	23.18	81.01	40.37	43.81	2.53405	3.69111e-05	0.000316625
GeneID:107816527	2.58	3.38	4.24	10.77	10.35	10.45	1.98267	2.48379e-17	8.22585e-16
novel.5137	1.4	1.68	1.38	4.11	5.54	2.81	1.89575	1.61686e-07	2.01167e-06
GeneID:107817603	0.84	0.55	0.81	2.34	2.09	2.43	2.0827	3.95139e-09	6.04869e-08
GeneID:107795630	0.69	0.48	0.62	3.28	3.12	3.2	2.79427	7.02222e-17	2.2389e-15
novel.18568	1.6	0.68	1.44	3.36	4	2.43	1.84032	0.000843097	0.00540961
novel.7076	5.08	5.15	6.21	10.36	16.76	13.39	1.71997	1.6181e-13	3.88645e-12
novel.15718	1.87	1.58	2.02	3.91	5.18	4.13	1.73244	0.000377111	0.00263159
novel.27333	3.82	1.84	5.48	6.45	5.72	6.63	1.26072	0.00953285	0.044891
novel.4048	1	0.77	1.49	10.17	10.76	6.15	3.44442	5.79338e-25	3.04705e-23
GeneID:107785159	0.08	0.2	0.1	0.53	0.45	0.29	2.12441	0.00694628	0.0343292
novel.25219	0.32	2.09	1.87	5.56	8.22	14.04	3.14297	1.63083e-05	0.00014864
novel.22821	0.34	0.37	0.31	0.72	0.85	1.85	2.13681	0.00346952	0.0188009
GeneID:107792445	0.95	1.09	1.73	2.71	2.94	3.28	1.61737	7.05704e-09	1.0466e-07
GeneID:107790389	0.76	0.63	1.07	1.87	2.16	1	1.48466	0.00524662	0.0269403
GeneID:107770781	12.88	8.16	16.54	38.72	30.75	30.36	1.85962	5.78804e-17	1.85243e-15
GeneID:107806457	0.72	0.85	0.61	3.52	5.24	5.37	3.10385	1.38674e-24	7.11554e-23
GeneID:107781876	1.36	1.07	1.05	1.91	2.61	2.71	1.47685	0.00161235	0.00960156
novel.24582	1.07	0.32	0.41	2.4	1.91	0.98	2.00394	0.00866085	0.0414385
novel.6555	2.17	1.79	1.14	5.6	6.13	2.48	2.06227	0.0052746	0.0270729
novel.3388	0.47	0.37	0.21	2.29	2.34	1.52	2.99066	2.56816e-05	0.000226579
GeneID:107773997	0.98	0.67	2.17	6.05	5.54	5.85	2.1957	5.26682e-09	7.92522e-08
GeneID:107774366	22.17	19.76	23.45	34.35	40.02	42.36	1.21423	8.57798e-26	4.80739e-24
novel.7691	0.38	0.23	0.49	1.79	2.69	1.92	2.90228	2.16967e-09	3.43814e-08
GeneID:107776402	25.98	28.71	32.28	82.33	85.88	90.5	1.78486	5.27052e-63	1.20836e-60
GeneID:107787261	0.14	0.12	0.1	0.28	0.23	0.54	1.91032	0.00379804	0.0203581
GeneID:107762748	1.73	1.65	2.3	4.65	4.07	3.67	1.53177	3.78873e-12	7.98245e-11
GeneID:107778157	8.39	7.89	10.35	14.41	16.66	16.82	1.21578	6.05967e-26	3.4265e-24
novel.20355	2.27	3.15	2.99	21.75	18.01	19.83	3.42839	8.99704e-16	2.61106e-14
GeneID:107823758	1.03	1.1	0.93	1.39	2.09	2.89	1.44968	0.00193104	0.0112875
GeneID:107778072	4.15	4.1	3.93	11.14	22.32	22.29	2.3604	2.32823e-25	1.26545e-23
novel.27214	1.62	1.91	2.77	8.75	11.26	10.22	2.6366	2.60281e-31	1.99822e-29
GeneID:107831921	0.22	0.14	0.57	0.69	0.76	1.32	1.92442	0.00134925	0.00821025
novel.2992	1.29	0.91	1.04	4.43	3.38	6.69	2.28901	6.65272e-12	1.37186e-10
novel.2810	0	4.89	3.5	30.89	31.85	43.43	4.32593	0.000571443	0.0038242
novel.27379	0.71	0.94	0.8	1.72	2.2	2.67	1.88484	0.00585673	0.0296415
GeneID:107760017	8.41	8.42	13.34	15.92	19.71	15.01	1.14291	7.38466e-10	1.23911e-08
GeneID:107765249	0.93	0.89	1.46	2.28	2.19	2.2	1.64315	3.0075e-15	8.29844e-14
GeneID:107783220	0	0.55	1.66	1.32	3.32	2.21	2.73733	0.00801528	0.0387922
novel.3079	0	1.28	0	5.39	6.34	13.27	5.00441	0.000488459	0.00331995
GeneID:107815555	510.52	406.57	811.81	1900.84	2920.58	3110.57	2.69031	2.92402e-15	8.08135e-14
GeneID:107796234	36.67	40.58	39.22	174.52	179.03	158.43	2.5322	4.70985e-128	5.16435e-125
novel.25073	7.69	3.05	0	32.23	8.17	17.39	3.1199	0.000190902	0.00142334
novel.1927	3.44	2.17	6.81	10.05	15.2	16.98	1.6617	3.46367e-06	3.53223e-05
novel.18328	0	0	0	2.98	1.82	1.37	5.47922	0.000333712	0.00235744
GeneID:107826598	2.71	2.49	3.22	14	11.99	12.9	1.64095	3.22607e-23	1.52501e-21
GeneID:107824193	7.08	6.3	7.91	9.88	13.53	14.79	1.50875	7.43435e-19	2.70354e-17
GeneID:107821861	1.81	1.01	1.87	2.88	4.46	3.63	1.62147	2.56127e-05	0.000226011
novel.15154	0.63	0.4	0	1.43	1.92	3.29	3.12175	5.48327e-05	0.000455711
novel.8634	0.73	1.28	1.17	2.18	1.93	1.35	1.17621	0.00205273	0.0119146
GeneID:107780517	9.31	7.66	19.41	19.84	38.63	33.99	1.7317	0.000156174	0.00118884
GeneID:107774709	1.63	1.83	1.69	3.77	4.8	4.19	1.86101	1.59267e-16	4.91933e-15
novel.20741	2.39	1.71	3.05	2.77	4.3	5.4	1.1696	2.81776e-05	0.000246991
novel.18384	0.35	0.73	0.93	2.3	3.45	4.66	2.89613	0.00112067	0.00694651
GeneID:107783346	8.22	8.88	9.83	16.98	19.13	17.75	1.37406	2.97615e-25	1.6055e-23
novel.24433	0	1.92	1.08	31.85	29.03	23.27	5.43615	6.98594e-14	1.72474e-12
novel.19002	0.13	0.83	0.7	2.05	1.24	1.68	2.02256	0.00528708	0.0271287
GeneID:107769001	626.98	650.1	775.26	2454.79	2420.2	2149.86	2.16357	1.46883e-106	9.37804e-104
novel.19884	0.98	0.83	0.64	1.88	1.17	1.88	1.40801	0.00415431	0.0219804
novel.6351	0.22	0.12	0	1	1.95	2.24	4.39474	1.77281e-05	0.000160537
novel.8640	0.59	0	0.15	1.8	2.71	1.68	3.44682	8.6173e-07	9.68251e-06
novel.17195	0.15	0.16	0.4	2.55	3.02	2.13	3.86906	4.25848e-06	4.28473e-05
GeneID:107831064	1.53	2.13	2.25	5.12	5.33	5.01	1.77473	2.80528e-12	5.98797e-11
novel.9502	0.11	0.06	0.1	1.06	1.07	0.82	3.86694	9.48231e-11	1.74363e-09
novel.24930	0.99	1.17	1.11	3.39	3.2	2.96	1.97229	2.40676e-08	3.35715e-07
novel.8297	0.17	0.55	0.31	0.78	2.97	2.35	3.01365	0.000808781	0.00521131
GeneID:107793974	0.35	0.14	0.59	1.45	0.98	1.04	2.02197	0.000997015	0.00627821
GeneID:107809346	2.52	0.98	2.62	4.71	3.38	4.57	1.55318	0.00156264	0.00934086
novel.4379	0.17	0.42	0.35	1.07	1.16	1.44	2.34388	3.31602e-08	4.53025e-07
novel.20646	0	0.19	0.16	0.92	2.74	1.54	4.36642	0.00055323	0.00371365
GeneID:107775019	2.31	2.93	2.67	4.76	4.72	3.67	1.13033	1.3061e-06	1.42409e-05
GeneID:107800703	0.52	0.45	0.47	0.68	0.75	1.08	1.17246	0.00382632	0.0204922
novel.7852	3.58	4.84	4.28	8.59	12.15	9.52	1.72215	6.00032e-07	6.90036e-06
novel.25856	0	0	0	8.8	9.52	5.71	7.54521	3.24608e-09	5.02699e-08
GeneID:107799420	1.46	1.53	2.01	3.85	2.8	2.66	1.27818	1.15352e-05	0.000108347
novel.22382	1.12	2.32	0.99	3.77	4.11	4.34	1.99428	0.00598499	0.0302058
GeneID:107828435	1.34	1.47	1.57	3.04	3.1	3.12	1.46444	6.9187e-11	1.29345e-09
novel.3528	0.1	0.11	0.09	2.25	1.29	1.14	4.42328	1.46382e-05	0.000134757
novel.25257	0.27	0.42	1.56	2.1	1.69	3.55	2.12211	0.00124004	0.00761274
GeneID:107815587	9.17	10.2	12.51	13.52	19.54	18.6	1.03915	4.01543e-08	5.42551e-07
GeneID:107777736	1.2	1.15	1.49	2.51	1.99	1.96	1.12353	7.70371e-06	7.43528e-05
GeneID:107803597	4.56	3.27	5.3	11.04	10.82	8.54	1.16669	1.93212e-09	3.08399e-08
novel.15220	0.15	0.27	0.23	2.05	2.89	1.87	3.77518	1.80785e-12	3.92367e-11
GeneID:107792144	4.28	5.29	4.01	6.83	12.09	19.44	1.30568	7.41587e-05	0.000601558
GeneID:107781273	6.34	5.29	5.75	15.09	14.46	15.53	1.74528	1.70806e-38	1.82527e-36
GeneID:107788381	2.19	1.99	2.03	3.37	4.11	4.34	1.30272	4.8224e-08	6.45362e-07
novel.19755	0.39	0.39	0.21	2.49	1.22	1.53	2.80711	2.97486e-10	5.19848e-09
GeneID:107823928	2.33	1.36	2.87	5.33	3.51	2.94	1.23773	1.22398e-05	0.000114293
GeneID:107825337	2.11	1.91	2.92	8.78	9.39	9.92	2.39035	2.64703e-45	3.67806e-43
novel.23712	0.88	0	0.59	2.6	4.62	1.53	3.04907	0.000343268	0.00241878
novel.7657	0	0	0	0.53	0.41	0.85	4.66204	0.00735698	0.0360656
GeneID:107781577	1.47	0.83	1.11	2.69	1.17	1.8	1.12188	0.00370162	0.0199089
novel.25014	2.48	1.84	3.6	20.1	39.22	47.28	4.18132	2.56525e-21	1.07644e-19
GeneID:107816303	2.23	1.36	2.77	3.18	4.69	4.59	1.35916	5.10279e-05	0.000426903
GeneID:107775730	0.43	0.64	0.54	1.64	1.77	2.49	2.2689	4.38137e-05	0.000371165
GeneID:107792359	1.45	1.12	1.56	3.16	3.38	2.31	1.4785	2.0374e-08	2.86731e-07
GeneID:107788748	10.44	10.59	9.35	32.09	39.47	62.72	2.60758	2.12823e-26	1.23103e-24
GeneID:107762736	0.56	0.79	0.66	1.51	1.76	1.41	1.58486	2.2605e-07	2.7494e-06
GeneID:107830750	0.96	2.27	4.17	9.05	10.54	11.56	2.01198	3.03471e-08	4.16851e-07
GeneID:107766754	3.69	3.2	4.57	6.77	6.88	6.16	1.17015	1.87823e-10	3.34521e-09
GeneID:107807346	1.72	1.44	3.09	3.49	3.84	2.51	1.04041	0.000973085	0.00614439
novel.14815	0.55	0.59	0.58	1.63	1.94	1.9	2.04571	1.83392e-07	2.26331e-06
novel.805	0.62	0.94	0.62	3.33	1.89	2.86	2.46143	0.000155193	0.00118263
novel.16397	0	0	0	3.75	8.87	13.71	6.52354	2.62894e-06	2.7363e-05
GeneID:107766026	5.62	5.22	7.13	20.06	22.64	19.81	2.17419	1.45171e-51	2.44077e-49
novel.15113	0.26	0.28	1.28	5.56	5.79	6.35	3.64565	6.04655e-20	2.35872e-18
GeneID:107801564	3.44	3.1	2.71	6.02	6.39	5.46	1.3142	1.39594e-16	4.35167e-15
GeneID:107813712	15.25	15.39	17.35	27.84	28.13	25.82	1.14302	3.74542e-25	2.00334e-23
GeneID:107762418	5.2	4.79	3.73	9.15	7.46	8.32	1.24212	2.33333e-10	4.11814e-09
GeneID:107832376	0.54	0.77	0.49	1.68	2.23	2	2.10684	1.34284e-07	1.68823e-06
novel.12403	0.81	0.9	1.18	6.16	5.88	6.04	3.01282	6.61006e-50	1.03864e-47
novel.4808	0	0.53	0.89	6.2	3	4.64	3.82268	0.000491312	0.0033371
novel.6624	0.88	0.7	1.17	3.52	2.29	2.52	1.97228	7.86955e-15	2.09353e-13
novel.12139	0.52	0.37	0.52	1.01	1.44	1.64	1.91723	0.000224647	0.00165199
novel.25250	0.08	0.09	0.15	1.08	1.03	0.9	3.60921	0.00017551	0.00132128
novel.15084	0.69	1.19	1.53	1.95	1.65	2.09	1.118	0.000298337	0.00213353
GeneID:107768660	0.2	0.16	0.27	0.75	0.53	0.38	1.77657	0.00105365	0.006579
novel.7390	4.16	2.99	4.73	8.03	10.03	8.65	1.53341	7.57045e-21	3.10444e-19
novel.16560	1.79	0	0	5.03	7.44	12.46	4.5903	0.00222084	0.0127742
GeneID:107808511	0.14	0.71	0.86	1.33	1.79	1.54	2.07495	0.00748201	0.0365754
GeneID:107783424	13.7	11.7	16.53	41.94	46.99	53.99	2.13689	2.57545e-69	6.90974e-67
GeneID:107784377	2.75	2.16	3.74	7.11	6.41	7.61	1.42627	7.0849e-10	1.19118e-08
novel.10983	21.92	20.46	25.58	38.28	37.07	41.98	1.17713	4.07308e-22	1.79113e-20
novel.13231	1.77	2	2.61	4.65	6.74	5.77	1.59884	9.57917e-14	2.34735e-12
GeneID:107822206	0.88	1.02	0.92	1	2.12	2.41	1.33252	0.000256323	0.00186238
GeneID:107828860	5.5	5.42	6.1	16.18	12.35	14.28	1.71252	2.74868e-26	1.57726e-24
GeneID:107805382	1.24	1.59	1.18	1.99	1.87	2.37	1.00807	7.73345e-05	0.00062519
GeneID:107831359	188.97	194.69	199.69	369.16	398.3	403.94	1.37564	3.34566e-70	9.27206e-68
GeneID:107769492	0.25	0.44	0.48	1.08	1.07	1.13	1.87428	8.02084e-11	1.48846e-09
GeneID:107806965	0.79	1.51	1.24	2.39	2.43	2.75	1.51737	1.61212e-05	0.000147177
GeneID:107768780	2.83	2.92	2.36	9.89	16.78	17.58	2.81658	8.82464e-41	1.02796e-38
novel.15590	0	0	0	16.65	5.89	9.23	5.41565	0.000428541	0.00294766
novel.20559	2.26	1.53	3.86	6.35	6.83	11.88	2.34955	0.00142636	0.00861607
novel.23251	0.4	0.21	0	1.19	3.82	2.99	4.21186	7.06878e-05	0.000575068
novel.27210	3.3	2.28	2.71	3.78	3.74	6.48	1.19356	0.00598645	0.0302101
GeneID:107772939	1.55	2.55	1.46	3.93	2.68	2.79	1.01335	0.000165476	0.00125285
GeneID:107795566	28.7	28.63	34.62	67.65	64.89	67.31	1.49638	6.34412e-50	9.99972e-48
GeneID:107775650	1.45	2.02	1.38	3.43	4.05	3.96	1.61035	2.77272e-14	7.05616e-13
novel.6660	0.72	0.22	0.83	6.76	5.49	5.63	3.73246	8.74679e-16	2.54429e-14
novel.3721	0	0	0.41	4.02	2.48	1.32	4.5782	0.00230738	0.0132117
GeneID:107808856	0.06	0.05	0.09	0.6	0.45	0.6	3.44699	2.12304e-12	4.57038e-11
GeneID:107793152	8.55	7.35	7.57	12.48	13.39	14.03	1.14011	4.96546e-15	1.33932e-13
novel.7121	4.75	5.08	5.03	29.45	53.76	68.13	3.74622	6.75403e-58	1.35724e-55
novel.4914	64.43	91.4	104.59	463.99	779.86	1246.26	2.83154	3.45687e-12	7.31994e-11
novel.19166	1.02	0	0	5.42	1.66	3.89	4.04374	0.00210909	0.012198
novel.8168	0.06	0.13	0	2.61	2.03	1.53	5.4848	4.16676e-09	6.36099e-08
GeneID:107809134	0.58	0.12	0.21	0.71	1.5	1.43	2.39474	0.0050482	0.0260407
GeneID:107788042	9.08	5.43	8.04	18.14	16.55	22.78	1.41759	1.38053e-06	1.49973e-05
novel.27140	1.68	1.2	1.62	5.1	4.53	4.68	2.08614	1.14132e-07	1.44933e-06
novel.1635	2.21	2.55	3.08	4.23	5.6	6.55	1.437	4.94709e-10	8.46139e-09
novel.6350	0	0	0	185.14	290.11	220.18	12.0255	6.31317e-24	3.12186e-22
GeneID:107788797	192.48	173.4	214.59	360.43	370.66	351.57	1.28297	6.12649e-45	8.37436e-43
GeneID:107821442	64.91	59.05	70.48	100.69	94.82	108.18	1.03779	4.50924e-24	2.24745e-22
GeneID:107790252	0.16	0.06	0.24	0.77	0.53	0.31	2.21119	0.00883906	0.0421353
GeneID:107767836	11.99	11.84	11.33	20.87	22.14	24.86	1.32176	1.62543e-26	9.49999e-25
novel.17254	0.22	0.46	1.7	4.13	3.82	11.23	3.41837	0.000136091	0.00104687
GeneID:107788158	1.05	1.07	1.13	2.15	2.13	1.94	1.17348	2.16204e-05	0.000193319
GeneID:107770763	0.9	0.95	1.08	1.52	1.33	1.73	1.01632	4.2707e-05	0.000362521
novel.16664	0	0	0	1.96	1.71	0.45	5.20418	0.00129595	0.00791842
GeneID:107758967	22.26	27.13	21.59	28	32.37	33.81	1.07288	2.52371e-13	5.94551e-12
GeneID:107815655	0.57	0.57	1.13	0.93	1.27	1.5	1.14831	0.000888604	0.00566199
GeneID:107807968	0.7	0.36	0.91	1.94	2.84	1.67	2.63833	1.11463e-05	0.000104929
GeneID:107791044	1.48	1.58	1.85	2.8	2.75	2.98	1.17023	5.17296e-07	6.0009e-06
GeneID:107780094	41.77	39.42	48.88	155.19	146.31	148.04	2.18489	1.18254e-98	6.62733e-96
GeneID:107809599	1.05	1.2	1.25	6.01	8.45	10.12	2.47653	7.35577e-17	2.33933e-15
novel.16870	0.27	0	0	2.58	1.58	0.62	4.57662	0.00252113	0.0142832
GeneID:107778949	0.13	0.14	0.12	0.34	0.53	0.75	2.47754	0.0083077	0.039984
GeneID:107802504	0.39	0.25	0.53	1	1.47	1.2	2.04024	1.44081e-05	0.000132858
GeneID:107796272	0.38	0.82	0.4	1.59	1.23	1.13	1.73519	2.29899e-06	2.40978e-05
GeneID:107798891	1.78	3.36	3.65	4.43	3.79	4.62	1.39836	1.17069e-07	1.484e-06
novel.8241	0	0.67	0	2.77	4.06	10.54	5.32771	0.000158462	0.00120371
GeneID:107766889	5252.64	5605.94	5875.61	12410.4	12284.4	12987.9	1.54407	6.35668e-84	2.54464e-81
GeneID:107786332	1.83	2.02	2.85	4.24	3.8	3.68	1.1866	8.67409e-11	1.60378e-09
novel.14370	31.78	26.47	44.24	42.03	54.43	44.1	1.08004	3.64322e-05	0.000312731
novel.22794	0.33	0.5	0.54	1.02	1.13	1.66	1.84277	1.12216e-05	0.000105618
GeneID:107819153	6.42	7.49	8.6	29.19	34.33	39.36	2.56002	1.26435e-87	5.40445e-85
GeneID:107781005	1.07	0.55	1.44	4.54	3.57	6.66	2.86319	0.00131366	0.00801593
novel.19515	0.74	0.8	0.9	0.94	2.18	2.13	1.49684	0.00488115	0.025311
GeneID:107805030	10.38	10.69	16.18	19.27	21.34	17.3	1.06167	2.3521e-07	2.85118e-06
GeneID:107775044	0.81	0.71	0.66	1.07	1.06	1.43	1.07457	0.00243418	0.0138434
novel.3990	0.12	0.26	0.11	2.16	0.8	3.13	4.04959	1.96444e-05	0.000176779
GeneID:107765916	0.84	0.75	0.63	1.38	2.12	3.06	1.98857	0.00202293	0.0117714
novel.3837	0.28	0.29	0.5	1.43	2.84	1.9	3.03246	0.00406519	0.0215899
novel.18579	0.35	0.38	0.8	1.13	2.81	1.68	2.24433	1.43968e-05	0.000132778
GeneID:107771036	0.31	0.25	0.6	0.69	0.81	0.73	1.36939	0.00365244	0.0196633
novel.8501	1.46	0.65	1.64	3.67	6.13	5.43	2.43397	3.45951e-08	4.71734e-07
novel.19347	0.15	0	0.27	1.36	0.59	2.06	3.63913	0.00155358	0.00929106
novel.8083	0.28	0.3	0.26	2.52	4.04	2.9	3.87437	4.38112e-15	1.1887e-13
GeneID:107801136	0.22	0.08	0.26	0.34	0.48	0.48	1.61082	0.00611924	0.0307633
novel.25387	1.25	1.63	3.18	4.01	5.14	4.27	1.53066	5.96332e-07	6.85939e-06
GeneID:107805891	3.15	3.11	4.28	9.66	13.51	14.3	2.20034	2.84141e-32	2.28213e-30
GeneID:107809338	0.53	0.83	0.94	1.93	1.19	1.5	1.39368	0.000164893	0.0012488
GeneID:107802858	0.71	0.19	0.16	6.01	4.7	4.53	4.30946	3.68736e-09	5.67206e-08
novel.3114	0.57	0.11	0.42	1.22	0.95	1.04	1.92988	0.000855521	0.00548235
GeneID:107826882	14.9	18.49	19.4	58.41	62.2	52.68	2.15064	5.77378e-43	7.31718e-41
novel.11565	0	0.97	0.41	6.69	4.04	4.95	4.09742	9.31879e-05	0.000741072
GeneID:107818652	0.75	0.47	0.83	3.73	3.88	2.73	2.70347	3.12341e-16	9.40548e-15
GeneID:107823085	0.3	0.29	0.31	0.6	0.5	0.84	1.52519	0.00715968	0.0352422
novel.9275	0.48	0.97	1.03	2.8	2.21	1.91	1.88067	9.31212e-06	8.86549e-05
novel.23038	9.92	10.86	11.69	35.02	46.45	40.58	2.30128	1.53676e-57	3.06373e-55
GeneID:107792165	0.4	0.8	0.73	3.68	3.02	1.44	2.48497	5.44812e-08	7.23342e-07
novel.572	2.95	2.66	1.47	11.36	5.8	8.73	2.6223	0.000477477	0.00325101
novel.19260	0	0	0	0.68	1.15	1.84	7.37537	1.27812e-08	1.84139e-07
GeneID:107794010	0.8	0.38	0.64	1.38	1.86	1.86	1.86235	2.4033e-05	0.000213078
GeneID:107805353	1.53	1.15	1.95	2.88	2.57	2.54	1.14249	0.000130271	0.00100593
GeneID:107810663	113.33	103.79	121.47	190.55	227.01	211.63	1.29886	1.53676e-40	1.76969e-38
GeneID:107760369	0.93	1.72	1.15	2.75	2.33	2.12	1.32752	0.000847213	0.00543395
novel.7081	0.81	0.77	1.14	1.43	2.42	2.81	1.69497	0.000696105	0.00456163
novel.22450	0.23	0	0.32	2.03	0.85	1.91	3.50927	0.000120477	0.000935894
novel.9995	0.78	0.91	0.83	3.08	2.36	2.82	2.08828	4.33884e-17	1.39928e-15
novel.11051	0.51	0	2.68	10.21	9.68	13.2	3.89667	1.22837e-07	1.55321e-06
novel.17092	0.43	0.34	0.67	1.05	1.9	0.96	1.8478	0.009517	0.0448415
GeneID:107815695	0.33	0.34	0.4	0.78	0.71	0.47	1.26709	0.0015351	0.00919036
novel.8480	0.74	0.78	0.61	1.03	1.19	1.42	1.13295	1.70131e-05	0.000154589
GeneID:107787156	0.13	0.25	0.21	0.44	1.22	0.97	2.59975	0.0106871	0.0494037
novel.6081	0.25	0.38	0.52	1.06	1.39	0.93	1.94778	9.63382e-05	0.000763306
novel.14415	0.81	1.28	1.36	2.84	1.7	1.76	1.26021	0.000308712	0.00219776
novel.14519	25.31	25.82	29.4	64.02	52.22	56.33	1.34624	2.46483e-27	1.51061e-25
novel.27302	0.34	0.3	0.48	0.41	1.01	1.09	1.50643	0.00255638	0.0144585
novel.7396	0	1.11	0	3.85	3.15	5.99	4.20857	0.000909465	0.00578541
GeneID:107790342	0.19	0.2	0.51	0.95	1.61	1.14	2.42352	0.000115407	0.000899693
novel.23015	0.75	0.59	0.6	1.55	0.99	0.99	1.24149	0.000411826	0.00284471
novel.17603	0.8	1.12	1.48	2	1.43	1.86	1.01215	0.000184183	0.00137957
novel.11473	0	0	0.17	2.01	1.48	1.37	5.04029	0.000359103	0.00251803
novel.16956	0.71	0.37	2.18	5.62	4.93	5.69	2.82514	7.81911e-05	0.000631627
novel.6648	0	0	0	1.38	2.51	0.32	5.71711	0.000195321	0.0014535
novel.20912	1.85	2.18	3.31	4.72	5.73	6.12	1.58746	4.28104e-07	5.02166e-06
GeneID:107814334	0.54	0.17	0.34	1.25	2.27	1.06	1.85989	0.00137234	0.00833266
novel.4347	0	0	0	32.68	18.18	23.31	9.28756	1.99844e-14	5.1402e-13
GeneID:107809126	2.45	3.28	4.39	5.75	5.65	6.09	1.14781	2.90325e-09	4.52384e-08
novel.21080	0.67	0.7	0.6	1.54	1.55	1.39	1.54958	6.521e-13	1.47296e-11
GeneID:107795799	11.5	12.06	13.43	22.09	22.65	18.79	1.15451	6.59641e-20	2.5633e-18
novel.5425	9.23	6.1	7.41	25.79	14.7	36.37	2.47067	4.20785e-05	0.000357727
GeneID:107791984	4.04	4.24	4.64	13.4	9.18	9.73	1.72379	1.17012e-12	2.57727e-11
novel.17979	3.3	4.23	3.41	10.03	9.01	7.23	1.68029	6.08648e-10	1.03366e-08
GeneID:107828091	21.34	20.39	22.62	40.09	32.97	34.15	1.214	1.14512e-10	2.0859e-09
GeneID:107831489	2.62	2.6	3.46	5.24	5.47	5.22	1.24506	1.70959e-10	3.05564e-09
GeneID:107769728	4.3	4.32	3.38	7.75	6.59	6.02	1.13495	1.08372e-10	1.97763e-09
novel.27081	0.17	0	0	2.18	0.67	0.68	4.74261	0.00148062	0.00889713
novel.19194	0.23	0.3	0.42	1.6	1.37	1.45	2.59627	2.18754e-07	2.66967e-06
novel.13895	0.75	0.47	1.08	12.04	10.12	8.74	4.13058	4.81698e-38	5.05122e-36
GeneID:107798220	0.16	0.46	0.1	0.54	0.94	0.96	2.13562	7.5369e-05	0.000610689
GeneID:107824492	0.37	0.66	1	3.08	3.07	2.61	2.52866	8.26054e-06	7.9287e-05
novel.19411	0	0	0	0.67	3.13	1.33	4.97004	0.00322121	0.0176392
novel.16873	0	0	0	6.92	1.63	1.76	5.47203	0.000470362	0.00320732
GeneID:107806205	9.91	9.37	11.01	55.17	56.93	59.77	2.87354	1.13275e-178	2.85674e-175
GeneID:107766572	0	0	0	1.6	1.8	1.45	6.74214	3.98242e-07	4.68774e-06
GeneID:107767693	5.76	5.68	6.71	7.83	9.93	9.65	1.42372	3.97796e-17	1.28536e-15
GeneID:107831395	233.1	213.45	239.89	581.52	579.1	546.76	1.69873	5.38709e-83	2.09015e-80
GeneID:107779703	1.12	1.24	1.56	7.81	7.05	6.54	2.82998	3.62974e-34	3.2461e-32
novel.16695	1.5	0.4	0.75	2.06	1.43	1.62	1.34596	0.0101232	0.0472082
GeneID:107831957	0.55	1.03	1.34	1.19	2.16	1.56	1.12084	0.00311678	0.0171605
novel.4162	0.47	0.25	0.74	1.86	1.88	0.76	2.04805	0.00522234	0.0268265
GeneID:107776598	2.93	3.29	3.72	8.75	10.66	15.72	2.19508	4.31672e-24	2.15575e-22
novel.11105	0	0.12	0.1	1.56	1.47	1.03	4.60148	0.000155332	0.0011835
GeneID:107817781	12.9	13.01	11.06	50.83	63.42	47.1	2.25802	1.01396e-45	1.4246e-43
novel.18508	0.31	0.99	0.42	1.98	4.15	2.74	2.82534	3.30948e-05	0.000286422
GeneID:107776410	2.52	2.22	2.78	4.06	4.12	3.74	1.03544	8.56304e-08	1.10832e-06
GeneID:107768740	0.99	1.02	0.87	2.6	2.86	3.03	1.91452	1.11132e-26	6.54073e-25
GeneID:107793208	68.92	67.65	209.53	152.07	390.23	335.07	1.76391	0.00684923	0.033916
novel.21026	30.76	42.61	33.43	103.06	96.01	91.56	1.86811	6.59847e-41	7.74e-39
novel.3134	8.66	9.35	12.88	18.79	15.4	17.57	1.11577	1.59712e-16	4.93006e-15
GeneID:107815128	0.19	0.04	0.14	0.79	1.33	1.2	3.51282	3.15934e-08	4.32674e-07
GeneID:107796894	0.08	0.08	0.35	1.51	1.45	1.84	3.61453	1.28103e-06	1.39917e-05
novel.15315	3.77	4.74	4.11	40.14	47.49	58.57	3.67726	4.07165e-90	1.867e-87
novel.19833	1.13	1.55	0.91	2.11	1.41	2.94	1.24418	0.00317636	0.0174315
GeneID:107764186	3.52	3.05	2.52	13.91	14.74	10.1	2.54895	7.08881e-17	2.2587e-15
novel.949	0.64	0.92	1.03	2.88	3.25	2.99	2.1851	1.57153e-18	5.59396e-17
novel.9556	1.66	3.97	1.44	3.93	3.55	10.66	1.96741	0.0092393	0.0437414
novel.26409	0.24	0.13	0.22	1.93	0.88	1.68	3.34283	0.00023527	0.00172382
novel.17353	0.83	1.52	0.53	1.84	3.23	3.11	1.91197	6.18177e-05	0.00050865
GeneID:107793832	2.43	2.38	3.1	3.43	4.49	4.5	1.01077	5.33313e-09	8.0202e-08
GeneID:107810992	19.45	18.02	19.99	37.87	36.25	33.67	1.27625	1.94136e-34	1.74857e-32
novel.15194	0.25	0.18	0.15	0.7	1.1	1.04	2.69021	0.0012876	0.00787311
GeneID:107784182	0.17	0.1	0.12	0.33	0.35	0.87	2.33414	0.00468059	0.0243838
GeneID:107799986	2.26	2.32	2.59	6.97	6.97	6.2	1.85774	4.02289e-40	4.58037e-38
novel.26528	1.93	1.88	2.09	4.26	3.44	2.74	1.19715	9.15973e-11	1.68739e-09
novel.13922	0.84	0.67	0.57	4.69	2.08	1.97	2.55379	0.000624843	0.00414472
novel.15124	1.97	1.41	1.85	2.76	2.68	3.63	1.18382	0.000508375	0.00344326
GeneID:107774597	0.17	0.12	0.16	0.83	0.96	0.29	2.60117	0.00176364	0.0104164
GeneID:107827770	21.36	23.25	24.14	27.15	44.64	48.07	1.1656	1.90228e-14	4.90538e-13
novel.3785	0.13	0	0.36	1.42	1.61	1.63	3.6021	0.000248151	0.00180796
GeneID:107811701	0.95	1.02	1.08	3.53	2.17	2.37	1.80629	2.20042e-06	2.31609e-05
GeneID:107814065	173.73	176.57	185.24	362.64	337.17	344.46	1.3455	1.34869e-52	2.37026e-50
GeneID:107782820	98.54	102.82	108.74	317.25	392.22	437.64	2.29517	7.68178e-97	4.12193e-94
novel.21774	0.21	1.35	0.76	3.48	3.39	1.5	2.33508	0.00200169	0.0116572
novel.3838	0.75	0.62	0.42	1.1	1.44	1.01	1.38729	0.0072374	0.0355658
novel.15417	32.68	25	37.91	123.27	154.08	136.02	2.51338	5.15785e-83	2.01672e-80
GeneID:107795622	60.41	64.01	72.93	286.06	444.84	548.52	2.78762	1.63955e-74	5.13646e-72
GeneID:107823556	6	6.22	5.03	10.56	10.92	9.92	1.25865	1.10134e-10	2.00834e-09
novel.2122	0	0	0	4.77	13.6	10.15	5.49296	0.000386624	0.00268981
GeneID:107816814	21.78	17.27	19.04	61.89	76.54	88.81	2.34816	9.93993e-37	9.88876e-35
GeneID:107802627	72.41	68.09	73.41	298.28	308.18	349.06	2.52128	5.45385e-186	1.44783e-182
GeneID:107808551	0.87	0.96	0.89	3.92	3.59	2.8	1.53759	1.72847e-06	1.85028e-05
GeneID:107786740	3.44	3.76	3.15	7.04	5.66	4.63	1.16846	5.73876e-06	5.65236e-05
novel.10566	0	0	0	0.76	0.49	3.32	5.13633	0.00210994	0.0122003
GeneID:107777518	2.3	2.35	2.17	5.16	6.48	7.17	1.83113	2.43014e-21	1.0206e-19
novel.25308	1.19	1.04	1.67	1.64	3.6	2.31	1.36262	0.00622533	0.0312106
GeneID:107822942	0.21	0.15	0.24	0.29	0.55	0.91	1.8843	0.000647425	0.00427484
novel.17950	0.67	0.36	0.5	1.86	2.16	0.36	1.94558	0.0104441	0.0484495
novel.14618	0.11	0	0.1	2.92	1.42	2.16	5.34025	3.96871e-06	4.0156e-05
GeneID:107762298	9.14	6.31	5.86	8.49	12.34	11.18	1.04546	0.000722549	0.00471531
novel.1466	0	0	0	1.06	2.73	4.45	5.0566	0.0022357	0.0128494
novel.20413	3.45	5.36	4.17	45.38	50.89	54.45	3.9447	7.63871e-113	5.50412e-110
novel.21251	1.9	1.87	1.49	12.03	17.62	10.94	3.73512	0.000669573	0.00440663
GeneID:107828077	1.55	0.89	0.27	2.06	3.64	2.4	2.22349	6.34523e-05	0.00052108
GeneID:107777947	0.18	0.04	0.2	0.98	0.65	0.9	2.95025	3.80658e-06	3.85775e-05
novel.3041	0.5	0.31	0.2	1.04	0.84	2.04	2.35277	0.00040366	0.00279404
novel.8918	1.41	0.67	0.62	4.72	3.36	2.42	2.35892	4.52866e-09	6.88223e-08
novel.24106	0.75	0	2.54	134.95	129.79	136.66	7.48209	7.4984e-29	5.02942e-27
novel.12399	0.38	0.13	0.68	2.1	1.32	1.13	2.33968	0.00279151	0.0156064
GeneID:107798433	0.1	0.17	0.03	0.43	0.18	0.44	2.21455	0.00865971	0.041437
novel.1666	0	0	0.34	4.46	3.45	3.92	5.42404	6.7218e-05	0.00054941
novel.18104	6.07	6.34	5.58	12.3	10.43	9.93	1.2236	1.10566e-18	3.9806e-17
novel.21850	0.55	0.83	0.6	1.17	1.79	1.63	1.63306	0.0100669	0.0470157
novel.18924	1.76	2.64	2.73	3.37	3.61	2.57	1.65653	5.08291e-09	7.66677e-08
novel.6976	0	0	0	3.48	5.48	2.28	4.87126	0.00388277	0.0207615
GeneID:107813173	0.28	0.33	0.28	0.32	0.75	0.64	1.29186	0.00532111	0.0272894
GeneID:107763084	0.28	0.33	0.46	0.95	0.81	0.76	1.59191	2.58165e-05	0.00022765
novel.18714	21.37	23.53	29.96	83.9	84.07	87.9	1.7634	5.89584e-52	1.0115e-49
novel.26570	16.17	16.41	21.14	233.73	220.44	238.13	4.18072	2.6537e-174	6.08408e-171
GeneID:107809246	12.66	13.36	15.73	25.54	28.16	27.24	1.32272	8.17331e-37	8.16344e-35
novel.17875	0	0.23	0.1	0.58	1.58	1.96	4.07595	0.000158611	0.00120467
novel.361	0.42	0.63	0.71	2.03	1.69	1.82	2.03853	6.50746e-10	1.0996e-08
GeneID:107776220	2.46	2.71	3.16	4.51	6.2	4.35	1.22216	1.37802e-09	2.23925e-08
GeneID:107776519	0.71	1.25	0.67	1.49	1.12	1.5	1.06348	0.00593211	0.0299629
novel.1506	0	0	1.91	7.32	2.7	5.39	3.52895	0.00291991	0.0162366
GeneID:107816207	1.94	1.53	1.79	2.63	3.43	3.21	1.1516	4.30671e-09	6.55875e-08
GeneID:107791655	1.96	1.6	1.65	6.26	6.05	7.3	2.27859	8.40289e-35	7.7201e-33
GeneID:107806928	0.76	0.84	0.99	2.37	3.15	1.87	1.78292	3.53689e-05	0.00030438
GeneID:107784087	0	0	0.1	0.17	0.45	0.64	3.96922	0.00350916	0.0189912
novel.20386	9.75	8.67	5.13	10.45	12.83	13.6	1.08646	9.39581e-05	0.000746558
GeneID:107781134	1.14	1.58	1.79	2.19	2.54	2.84	1.12122	3.69045e-06	3.75061e-05
novel.8496	2.62	2.19	4.14	20	30.56	40.48	3.72662	1.32085e-24	6.79127e-23
GeneID:107790904	0.39	0.49	0.89	1.25	1.58	1.96	1.81877	0.000406909	0.00281383
GeneID:107793722	11.64	10.24	17.6	21.71	22.43	22.55	1.14597	3.56677e-12	7.53683e-11
novel.25980	0.23	0.48	0.2	1.01	3.06	2.46	3.34953	0.00100383	0.00630931
novel.11157	1.88	2.19	1.92	2.82	4.15	3.79	1.24033	0.000297485	0.00212835
GeneID:107779696	1.31	1.93	1.46	4.28	4.2	3.65	1.75678	7.31167e-10	1.22727e-08
novel.3511	0	0	0	38.92	32.58	20.08	4.96228	0.00258228	0.0145821
novel.15734	3.84	3.07	3.96	5.48	5.78	6.65	1.15061	0.000615512	0.00408766
novel.10273	0.6	1.44	0.91	26.71	31.26	20.59	5.21329	6.96155e-62	1.53333e-59
novel.9489	0	0.32	0	3.84	1.33	2.31	5.03641	0.000418617	0.00288648
novel.2967	5.14	4.84	5.05	29.29	23.97	24.06	2.76389	4.1975e-53	7.58844e-51
novel.257	1.15	0.52	0.52	1.32	0.97	2.19	1.40765	0.00305607	0.0168815
GeneID:107801592	6.47	3.65	12.29	24.74	31.52	37.53	2.70062	2.64017e-10	4.63837e-09
novel.1013	0.67	0	0.4	1.98	1.51	2.59	2.97022	0.00218544	0.0125907
novel.22040	0.27	0.19	0.28	0.54	0.79	0.52	1.7035	0.00855545	0.0410315
novel.15929	0.42	0.45	0.75	1.26	4.76	3.38	2.95684	1.15155e-05	0.000108182
novel.5054	0.69	0.89	1.06	1.53	2.76	1.1	1.41932	0.00400742	0.0213195
novel.16871	0	0.14	0.12	0.51	1.4	0.44	3.5773	0.010281	0.0478289
novel.20920	0.35	0.49	0.73	1.92	1.86	1.41	2.14786	0.00117827	0.00726983
GeneID:107788391	0.76	0.5	0.65	1.68	1.41	1.34	1.14489	0.000303488	0.00216546
novel.16437	1.51	1.29	1.84	8.97	8.48	9.47	2.95383	1.74103e-25	9.59736e-24
GeneID:107760274	3.58	4.47	4.25	7.65	11.93	14.09	1.83048	1.16235e-16	3.64373e-15
GeneID:107818846	397.67	387.71	382.14	703.13	640.42	567.74	1.0852	4.14798e-24	2.07354e-22
novel.19029	0.19	0	0.73	16.76	16.34	16.09	6.72566	4.03701e-10	6.96384e-09
novel.18601	2.02	0.84	3.2	12.8	9.92	8.74	2.91231	1.73993e-07	2.15522e-06
GeneID:107798526	1.61	1.37	2.32	4.09	3.1	3.57	1.1046	0.00238764	0.0136156
GeneID:107782077	1.93	1.94	2.28	3.18	3.23	3.14	1.02311	0.000623022	0.00413373
GeneID:107787987	0.85	1.59	1.6	2.27	2.24	2.63	1.2105	0.00088194	0.00562521
novel.5839	1.3	0.66	0	0.91	3.63	6.53	3.20157	0.00983426	0.0460909
novel.988	0	0.11	0.47	1.89	1.1	2.22	3.53871	2.74451e-05	0.000241042
GeneID:107771919	0.51	0.57	0.41	2.54	2.12	1.41	1.83799	0.00128354	0.00785116
novel.14269	1.81	3.07	2.6	17.92	14.19	16.23	3.13655	1.77184e-31	1.3686e-29
novel.24454	0.98	1.38	1.62	11.01	22.17	19.52	4.19925	1.91009e-30	1.40442e-28
GeneID:107815815	40.17	53.25	47.05	298.75	296.94	285.53	3.03722	1.81821e-168	3.66834e-165
GeneID:107773940	0.18	0.07	0.28	0.66	0.67	1.08	2.55165	0.00106328	0.00663582
GeneID:107832513	56.34	66.03	57.54	250.69	233	247.17	2.4128	1.56936e-118	1.29765e-115
GeneID:107792909	0.39	0.79	0.89	3.74	2.72	2.89	2.50637	1.33059e-07	1.67505e-06
novel.504	0	0	0	1.94	3.51	2.47	7.11421	4.86517e-08	6.5074e-07
GeneID:107800455	2.07	2.73	1.88	5.84	4.61	4.77	1.59631	4.1934e-07	4.92459e-06
GeneID:107802441	25.88	30.69	30.56	136.41	139.53	136.45	2.64927	6.28617e-98	3.44639e-95
GeneID:107813560	6.89	6.35	10.16	23.19	20.44	18.39	1.90753	1.71468e-32	1.39495e-30
novel.1947	0.46	0	0.41	4.31	1.23	4.26	4.02603	0.00228756	0.0131086
novel.21051	2.01	1.04	1.48	5.34	10.61	11.12	3.11681	9.73915e-08	1.25027e-06
GeneID:107786240	17.54	16.1	19.14	30.26	33.21	30.51	1.22698	1.06026e-33	9.28448e-32
novel.9398	0.51	0.68	1.32	1.41	2.88	3.87	2.05534	1.54967e-08	2.20989e-07
GeneID:107832429	0.06	0.03	0.25	0.43	0.24	0.47	2.07224	0.00860255	0.0412221
novel.5170	0.42	0	0	0.9	2.26	3.89	4.59188	0.00243038	0.0138265
GeneID:107765689	0.91	0.9	0.97	1.99	1.73	1.26	1.19283	0.000184601	0.00138229
novel.25428	0.44	0.24	0.67	63.08	81.18	94.59	7.8307	4.27461e-105	2.56132e-102
novel.15660	0.66	1.53	1.21	3.51	2.05	3.51	1.85463	4.75707e-05	0.000400503
novel.9183	1.9	1.48	1.78	5.13	6.2	5.88	2.216	3.64711e-08	4.9584e-07
novel.4628	0.58	0.6	0.5	3.3	4.44	1.59	3.1064	0.00977516	0.0458267
GeneID:107782491	124.93	131.67	127.96	265.95	353.73	432.97	1.81772	4.1934e-48	6.27628e-46
novel.16013	0.31	0.11	0.66	1.03	1.44	1.63	2.3056	0.00207976	0.0120507
novel.20018	0	0	2.73	19.31	17.98	13.04	4.75281	9.37762e-05	0.00074523
novel.783	0.39	0.63	0.18	1.64	0.82	0.86	1.88844	0.00106711	0.00665482
GeneID:107762655	10.58	11.95	13.68	58.71	68.37	63.82	2.82494	9.83242e-75	3.13884e-72
novel.9602	0.19	0.1	0.25	1.78	1.84	1.39	3.60113	5.57968e-06	5.51398e-05
GeneID:107781165	0.24	0.42	0.2	0.58	0.94	1.2	1.90323	1.17994e-06	1.2969e-05
GeneID:107782768	2.79	3.35	3.26	8.61	12.68	15.05	2.44985	1.22013e-32	1.00231e-30
GeneID:107812332	25.02	21.44	22.43	67.22	70.81	82.92	2.14696	9.73568e-41	1.13147e-38
novel.20576	0.32	1.01	0.86	4.47	3.22	2.4	2.72508	0.00124506	0.00763986
novel.15027	0.5	0.65	1.27	2.75	2.38	1.24	1.81158	0.00146972	0.00884408
novel.24321	0.15	0.16	0.13	0.6	1.32	1.16	3.1884	4.95713e-06	4.93843e-05
GeneID:107806087	0.97	1.1	1.51	1.07	2.17	2.53	1.08306	0.008001	0.038737
novel.25056	0.75	1.02	1.41	2.12	2.11	2.33	1.42311	9.23916e-05	0.000735618
novel.3680	0.67	0.23	0.2	4.27	0.33	1.03	2.84342	0.00908039	0.0430943
GeneID:107798979	7.43	7.78	8.82	14	15.01	14.76	1.23292	7.37188e-26	4.15453e-24
GeneID:107807866	0	0	0	0.48	0.69	0.46	5.60571	0.000172724	0.00130341
GeneID:107786653	1.24	0.62	1.66	0.87	1.77	1.27	1.39996	0.000699372	0.00458006
GeneID:107770788	0.05	0.03	0	0.25	0.37	0.18	3.67113	0.000928025	0.00589529
GeneID:107792724	1.52	1.58	1.49	2.65	2.26	2.6	1.07495	2.13559e-07	2.61103e-06
GeneID:107791190	3.18	3.61	4.4	5.47	7.01	6.94	1.17066	1.36988e-08	1.96741e-07
GeneID:107797754	10.06	12.1	13.17	31.09	27.05	29.63	1.72846	1.83504e-30	1.3512e-28
novel.14508	0.34	0.6	0.41	2.66	3.2	3.42	3.20608	6.10393e-08	8.05536e-07
GeneID:107799797	23.91	25.03	27.43	42.54	42.43	46.45	1.28038	2.44117e-12	5.23289e-11
novel.22969	0.27	0	2.25	2.97	5.85	3.34	3.29041	0.00770477	0.0374827
novel.26421	0.24	0.63	0.96	4.03	3.24	5.7	3.23385	1.95614e-09	3.11937e-08
novel.2227	1.17	1.77	0.9	1.38	3.26	4.13	1.63538	0.00680494	0.0337357
GeneID:107764608	7.52	6.11	8.76	13.04	12.01	11.02	1.06452	1.11759e-12	2.4648e-11
GeneID:107786494	1.9	2.27	2.3	5.17	7.39	6.79	1.95053	1.67435e-20	6.74543e-19
novel.10	2.21	0.87	2.96	6.71	10.95	6.28	2.37175	4.09857e-06	4.13704e-05
GeneID:107822394	3.09	3.7	3.6	6.54	8.26	6.47	1.45419	1.46609e-07	1.83631e-06
GeneID:107789058	1697.02	1631.84	1659.27	3048.82	2510.52	2259.76	1.02522	9.22954e-18	3.1391e-16
GeneID:107764364	0.4	0.34	0.29	1.19	1.28	0.91	2.10078	1.90887e-05	0.000171993
GeneID:107822150	2.01	2.37	2.88	3.62	4.02	4.95	1.1641	2.31816e-08	3.24253e-07
novel.23733	0.11	0.12	0.3	0.84	0.18	1.72	2.7692	0.0097114	0.0455744
novel.20853	1.46	2.39	2.42	3.74	2.62	3.42	1.05061	0.00475599	0.0247358
novel.26298	0	0	0	0.85	1.14	5.71	5.21686	0.00164595	0.00978615
GeneID:107817418	7.24	6.53	9.39	11.66	12.71	13.27	1.05286	1.31108e-10	2.37706e-09
GeneID:107800829	3.17	4.3	4.94	7.95	8.15	15.96	1.92147	6.88381e-09	1.02272e-07
GeneID:107797415	0.23	0.32	0.41	0.81	1.13	1.01	2.00518	0.00403172	0.021433
novel.11732	0.12	0.09	0.17	0.62	0.74	0.99	2.97344	2.96549e-09	4.61371e-08
GeneID:107799116	3.84	2.5	3.05	5.55	6.12	5.95	1.31422	1.03496e-05	9.79038e-05
novel.15240	0.38	0.58	1.28	3.36	3.45	3.87	2.63111	4.69319e-12	9.81019e-11
GeneID:107822131	3.87	2.19	3.87	4.66	6.55	5.16	1.1013	2.33029e-05	0.000207187
novel.16576	1.17	0.6	1.01	4.53	4.07	5.96	3.00382	0.00139773	0.00846846
GeneID:107825002	2.32	3.13	3.36	18.01	23.73	23.33	3.26585	9.00151e-72	2.56513e-69
novel.9158	5.81	4.96	6.68	12.19	12.44	8.67	1.56866	2.8846e-08	3.97748e-07
GeneID:107804933	0	0	0	1.53	1.64	1.72	7.57565	2.14908e-09	3.41087e-08
novel.21706	0.27	0.13	0.37	2.77	2.75	2.18	3.67875	5.81627e-25	3.0559e-23
GeneID:107822808	0.29	0.36	0.08	1.44	1.8	1.55	3.12478	1.67798e-09	2.69798e-08
novel.6501	0.26	0	0.16	0.59	0.85	0.79	2.80329	0.00474257	0.0246787
novel.16102	0.35	0.61	1.27	3.32	2.52	2.1	2.21945	7.04529e-08	9.22287e-07
novel.2683	0	0.09	0.16	1.55	1.24	1.1	4.31603	2.78867e-05	0.000244622
novel.4126	3.4	3.16	3.2	7.4	9.89	8.05	1.65173	4.63928e-22	2.03656e-20
GeneID:107832725	1.11	1.23	1.11	3.35	3.13	3.75	1.95107	8.9674e-13	1.99782e-11
GeneID:107782692	1104.96	1247.14	1766.46	8568.79	10730.4	10276.9	3.43209	1.60388e-125	1.65099e-122
novel.27527	2.58	2.57	1.05	9.89	13.38	7.81	3.09571	0.000908284	0.00577863
novel.25767	0.65	0.92	0.85	1.81	1.75	1.75	1.52216	2.60156e-05	0.000229286
novel.20471	0	1.77	7.07	27.28	40.45	37.12	4.18927	6.22125e-08	8.20161e-07
novel.4968	0.91	0.63	0.81	8.4	8.26	7.93	3.90531	2.60922e-09	4.09097e-08
GeneID:107808627	0.36	0.82	0.57	1.47	1.64	2.51	2.05553	1.75171e-06	1.8731e-05
novel.8373	1.48	1.77	1.6	4.48	3.98	3.33	1.65609	8.7059e-15	2.30871e-13
GeneID:107829369	1.34	1.32	1.49	4.85	5.45	6.02	2.38429	1.42991e-10	2.5786e-09
novel.7900	0	3.95	0	6.06	23.7	8.8	4.17875	0.00968461	0.0454571
GeneID:107787133	17.88	16.27	15.69	41.8	42.25	46.93	1.37308	8.51766e-27	5.0366e-25
novel.22840	0	0	0	0.56	1.42	1.02	6.45842	2.6362e-06	2.74216e-05
GeneID:107816022	1.24	1.23	1.33	2.15	1.74	1.9	1.02709	0.00267251	0.0150227
GeneID:107767417	6.16	7.6	8.44	14	16.34	16.01	1.4578	6.19836e-16	1.8301e-14
novel.24689	0	0	5.24	37.18	23.24	13.62	4.47592	0.00542187	0.0277244
novel.12518	0	0	0	1.26	7.44	5.19	4.77919	0.00655073	0.0326108
novel.2741	0	1.28	0.54	2.65	4.71	5.5	3.47137	0.00248146	0.014079
novel.12249	0.4	0.51	0.6	1.8	1.67	2.2	2.28282	3.80004e-15	1.03864e-13
GeneID:107774716	2.11	1.79	2.16	4.52	5	6.05	1.72904	6.20085e-16	1.8301e-14
GeneID:107791113	0.34	0.42	0.27	1.33	0.84	2.04	2.40609	2.75456e-06	2.85703e-05
GeneID:107819802	21.61	21.59	29.09	74.03	73.19	76.01	2.04757	1.60835e-52	2.81679e-50
GeneID:107817654	310.98	321.01	378.66	1196.37	1019.87	922.91	2.19761	2.27057e-85	9.38731e-83
novel.5639	1.64	1.32	1.59	2.47	2.47	2.06	1.51959	0.000755845	0.00491037
novel.11096	52.83	50.43	39.45	79.72	100.81	92.47	1.71405	0.000695874	0.0045607
GeneID:107820071	0.19	0.33	0.91	2.15	1.41	1.57	2.23396	4.85955e-05	0.00040811
GeneID:107793977	0.71	2.88	1.42	2.77	4.6	0.83	1.1983	0.000367352	0.0025706
novel.4376	0	0	0	9.5	13.01	15.74	7.62294	1.96013e-09	3.12475e-08
novel.20784	0	0	0	1.87	2.97	4.06	6.21356	9.42423e-06	8.96039e-05
novel.11090	0.21	0.11	0.47	1.27	0.51	1.2	2.31068	0.00875857	0.0418227
novel.16127	0	0	0	1.92	9.31	14.9	5.14167	0.00205825	0.0119397
novel.12084	0.04	0.43	0.55	2.16	2.28	2.31	3.10481	4.81856e-12	1.00514e-10
GeneID:107761443	4.64	5.04	4.83	7.01	7.96	8.21	1.05094	3.40395e-10	5.91632e-09
novel.27799	0.39	0.42	0.27	1.05	1.93	1.38	2.42221	0.000607641	0.00404178
GeneID:107800561	2.13	2.72	2.72	6.9	8.68	8.97	1.58209	4.98974e-09	7.54203e-08
novel.23309	0	0	0	7.54	7.44	1.04	4.86635	0.00494494	0.0255918
novel.8838	1.19	1.07	1.77	1.86	3.21	3.13	1.39528	3.49106e-05	0.000300898
novel.22223	4.07	0	0	8.52	16.17	18.77	4.27265	5.82872e-05	0.000482591
GeneID:107799164	1.39	1.31	1	1.58	2.34	1.9	1.02259	0.00165427	0.00982802
GeneID:107790260	1.94	1.62	1.78	6.57	5.62	4.08	1.64008	1.92208e-10	3.41848e-09
novel.14630	0.76	0.79	0.34	1.65	4.73	4.98	3.17007	0.000788319	0.00509835
novel.10204	10.77	0	7.41	77.38	84.92	120.02	4.69126	3.02335e-20	1.20169e-18
novel.2172	0.69	0.54	1.08	5	2.66	4.35	2.82136	2.84044e-06	2.94066e-05
GeneID:107820145	3.16	3.36	3.01	5.33	4.74	4.93	1.03359	8.56245e-10	1.42724e-08
novel.6605	2.19	1.1	1.98	3.7	3.61	6.07	1.76223	5.41447e-05	0.000450289
GeneID:107820054	0.79	1.67	0.86	4.37	5.09	3.49	2.69721	5.83414e-11	1.10048e-09
novel.26039	0.18	0.57	0.64	4	3.45	3.96	3.49028	5.7758e-07	6.65583e-06
novel.20497	0	0	0.11	1.48	0.88	1.1	5.16486	0.00022033	0.00162331
novel.3659	1.03	0.44	1.85	1.99	4.08	4.52	2.12902	0.000998529	0.00628617
GeneID:107783933	1.03	2.61	3.68	12.1	8.45	9.42	2.43007	1.96675e-09	3.13431e-08
novel.12347	0.27	0.29	0.85	2.55	2.15	3.72	2.98203	7.7012e-06	7.43427e-05
GeneID:107802241	3.05	2.26	2.99	3.74	6.19	6.87	1.41152	7.69189e-06	7.42671e-05
novel.25726	1.33	0.35	2.35	5.31	4.69	3.69	2.27766	0.00108724	0.00676775
novel.8674	0	0	0	4.04	1.47	5.34	5.28164	0.000862149	0.00551992
GeneID:107771906	0.1	0.09	0.11	0.2	0.12	0.31	1.49442	0.0105629	0.0489062
GeneID:107766490	0.34	0.24	0.41	0.56	0.94	1.36	1.91076	0.00234592	0.0134084
novel.12921	7.87	3.92	7.45	82.13	94.02	110.15	4.6975	2.12061e-24	1.07176e-22
novel.24244	0.32	0.56	0.47	2.46	1.03	1.84	2.45791	5.70137e-05	0.000472669
novel.4506	0	0	0	2.47	3.61	2.82	4.96456	0.00256561	0.014501
GeneID:107784848	12.51	14.44	11.85	28.9	29.48	26.2	1.49375	1.10049e-33	9.62006e-32
GeneID:107775655	26.94	27.27	34.78	45.79	42.54	45.64	1.03457	4.31166e-11	8.20663e-10
novel.727	0	5.13	0.33	22.14	36.98	27.66	5.32773	0.000130115	0.00100488
novel.7378	3.32	3.93	3.84	19.23	20.44	18.94	2.88758	7.32232e-85	2.97847e-82
GeneID:107792077	1.64	1.09	2.19	3.39	4.83	5.9	1.91033	6.31144e-08	8.314e-07
novel.9612	0.45	0.51	0.43	1.34	0.93	0.88	1.56205	2.39311e-05	0.000212398
GeneID:107831954	3.47	2.76	3.04	5.22	6.22	5.39	1.23396	4.76507e-06	4.7546e-05
novel.7582	0.39	0.82	0.87	2.31	4.3	4.42	2.8692	1.84144e-05	0.000166393
novel.2746	3.94	4.36	3.6	14.86	12.51	11.8	3.81619	5.42281e-95	2.84918e-92
novel.4395	3.51	0	1.39	4.92	7.31	13.27	3.18152	0.00894597	0.0425805
novel.24742	0.2	0.07	0.12	1.25	0.38	0.82	3.07278	0.000549152	0.0036891
GeneID:107759297	2.52	1.6	2.26	4.15	4.44	5.48	1.58514	0.000354095	0.00248749
GeneID:107771215	0.11	0.06	0.22	0.37	0.18	0.53	1.94819	0.00757408	0.0369396
novel.14320	674.4	683.57	684.1	1313.28	1164.33	1141.54	1.20608	2.87109e-35	2.69173e-33
GeneID:107828307	9.44	12.09	14.14	30.63	47.29	30.91	2.01055	4.1417e-27	2.48399e-25
GeneID:107816131	0.3	0.37	0.41	0.75	0.8	0.93	1.63188	0.00138766	0.00841755
GeneID:107781575	0.19	0.42	0.29	1.46	1.76	1.37	2.73037	2.11847e-10	3.75584e-09
novel.21805	0.24	0.13	0	0.99	0.86	0.87	3.35442	0.0034545	0.0187316
GeneID:107824881	25.91	26.5	28.62	46.74	43.69	46.07	1.16148	3.13127e-20	1.24361e-18
GeneID:107793042	3.56	3.41	4.16	6.38	6.64	7.53	1.18778	2.13104e-08	2.99325e-07
novel.9233	4.18	1.69	2.83	18.13	20.75	12.41	3.23926	2.85434e-07	3.42134e-06
GeneID:107830534	93.05	86.54	82.74	224.25	211.8	213.54	1.68074	2.99818e-64	7.27045e-62
novel.26554	1.72	0	0	7.2	3.03	4.42	3.79009	0.00481578	0.0250047
novel.20612	1.45	3.79	2.73	8.31	4.36	8.82	2.01954	0.00108263	0.00674159
novel.1	0.25	0.69	0.66	2.71	2.99	1.17	2.53539	9.05677e-08	1.16773e-06
GeneID:107794713	0.11	0.25	0.1	0.68	0.42	0.26	1.95231	0.0104096	0.048307
GeneID:107830301	23.09	22.57	25.08	58.58	56.24	57.83	1.59675	2.66783e-65	6.62869e-63
GeneID:107816982	3.53	3.01	4.04	11.1	13.01	12.03	2.15709	1.17227e-26	6.88339e-25
novel.10677	1.93	2.05	1.12	3.13	2.76	3.33	1.28673	0.00759112	0.0370012
novel.9242	1.12	1.58	1.23	5.95	5.58	5.71	2.5168	5.19624e-25	2.74443e-23
novel.7153	0	0	0	4.25	8.11	10.2	6.13741	1.58937e-05	0.000145334
GeneID:107824924	2.92	2.91	2.97	4.37	5.09	6.83	1.24677	3.4231e-15	9.39379e-14
novel.301	0.25	0	0.33	2.63	2.23	2.47	3.98474	3.63282e-17	1.17761e-15
novel.27316	0	0.11	0.36	2.34	1.3	1.64	3.87811	7.57224e-06	7.31398e-05
novel.24558	0.08	0.09	0.35	1.69	1.33	2.37	3.71277	4.72753e-11	8.97111e-10
GeneID:107819044	185.3	187.34	177.09	610.86	595.02	667.62	2.13497	4.42622e-124	4.27774e-121
novel.21182	20.47	19.79	22.79	99.32	87.91	88.03	2.50899	2.20456e-113	1.61154e-110
novel.8180	0.5	0.52	0.44	3.58	2.96	3.86	3.4283	0.00237133	0.0135348
GeneID:107817906	7.18	7.24	7.82	15.8	10.94	14.08	1.26991	6.52174e-12	1.34705e-10
novel.26895	0.31	4.75	0.77	15.28	11.41	12.92	3.16422	0.00221224	0.0127291
novel.15857	2.49	2.65	4.07	3.86	4.89	8.86	1.36996	0.000950315	0.00601795
GeneID:107826239	1.67	2.22	1.75	3.61	4.01	3.98	1.23581	7.89479e-06	7.60369e-05
novel.12933	0.8	0.86	0.93	3.1	3.1	3.25	2.25974	2.73129e-10	4.79011e-09
GeneID:107820974	1.65	0.56	2.43	8.2	7.19	6.34	1.99576	2.25581e-11	4.4221e-10
GeneID:107804598	1.94	2.17	2.22	6.51	6.74	5.5	2.14933	1.54142e-22	6.9729e-21
novel.10723	0.36	0.37	1.15	2.44	2.01	3.21	2.42406	1.01643e-07	1.30221e-06
novel.142	3.96	4.76	5.39	8.02	8.85	7.94	1.36197	9.99376e-07	1.11152e-05
novel.16137	1.49	1.22	3.17	2.6	3.59	3.62	1.13943	0.00467456	0.0243636
GeneID:107763638	47.69	56.95	58.73	219.9	249.8	230.4	2.51371	4.49494e-124	4.27774e-121
novel.8185	8.13	3.22	3.89	62.59	91.61	88.77	4.78576	1.75236e-17	5.86513e-16
GeneID:107807944	6.42	8.6	7.7	21.95	22.34	29.55	2.0771	1.22476e-43	1.58806e-41
novel.10333	0.35	0.34	0.86	2.32	3.7	4.96	3.18075	6.86467e-17	2.19005e-15
novel.23358	0.11	0.23	0	2.32	2.04	1.34	4.54466	5.6923e-06	5.61207e-05
novel.1341	0.37	0.71	0.33	3.16	4.22	5.6	3.6062	8.67889e-15	2.30276e-13
novel.11844	5.1	6.91	9.32	8.76	15.6	12.77	1.3613	0.000989644	0.00623958
novel.15073	3.83	2.23	5.34	17.38	17.1	15.9	2.55852	7.62332e-23	3.52441e-21
GeneID:107786018	1.17	1.76	1.83	7	7.19	6.67	2.18149	2.67432e-20	1.06632e-18
GeneID:107770339	41.21	37.92	57.56	79.24	67.76	78.8	1.14741	1.36326e-15	3.89364e-14
novel.27341	0.14	0.15	0	1.5	1.13	2.07	4.48347	0.000251649	0.00183027
novel.16489	3	4.24	2.74	7.62	13.53	11.87	2.05481	1.66017e-14	4.3119e-13
GeneID:107830070	19.36	17.81	20.67	30.75	34.16	31.87	1.11296	2.03115e-27	1.25244e-25
novel.25347	0.21	0.22	0.19	1.8	2.01	1.61	3.56565	6.12291e-06	6.0096e-05
novel.8968	0.15	0.08	0.34	1.82	1.18	1	3.1969	2.22059e-05	0.000198028
GeneID:107784731	0.3	0.16	0.75	1.21	0.93	1.69	2.04217	0.00177187	0.0104601
GeneID:107794041	1.76	1.73	1.82	3.07	3.37	3.34	1.25184	3.85642e-09	5.91588e-08
GeneID:107820626	3.08	3.22	3.27	7.5	5.32	4.02	1.29846	4.75777e-08	6.37389e-07
GeneID:107781813	0.94	0.86	0.61	1.69	1.21	1.01	1.04134	0.00651938	0.0324643
novel.24796	0	0.31	0.27	1.98	1.08	2.48	3.75508	0.00512766	0.0263993
novel.5169	0.24	0.09	0.04	1.63	0.41	0.48	3.18763	5.07123e-05	0.000424473
novel.8191	0.15	0.32	0.14	0.68	2.39	1.22	3.2708	0.0015986	0.00952754
novel.27084	0	0	0	8.94	13.64	1.7	4.77155	0.00694724	0.0343305
GeneID:107805523	0.57	0.45	0.27	0.73	1.15	0.96	1.51277	0.00202407	0.0117767
GeneID:107830592	0.13	0.12	0.12	0.45	0.38	0.38	2.15857	0.00310786	0.0171151
novel.23742	1.13	1.37	1.6	4.73	5.82	3.75	2.24718	3.38729e-06	3.45924e-05
GeneID:107786806	1.96	2.23	1.94	5.12	4.89	4.1	1.59498	7.60212e-09	1.12315e-07
novel.12274	62.99	71.24	118.72	105.91	104.09	102.66	1.00643	6.99273e-05	0.000569708
GeneID:107763501	5.35	4.83	6.64	15.6	12.7	12.88	1.67258	4.38514e-24	2.18776e-22
GeneID:107786903	5.84	4.26	7.38	7.26	10.77	10.03	1.08487	1.85703e-05	0.000167682
novel.22489	0.72	0.58	0.66	1.71	1.71	1.52	1.72261	0.000197945	0.00147172
GeneID:107778754	1.36	1.57	2.15	2.74	3.74	3.61	1.4071	0.000958502	0.0060637
GeneID:107807185	1.92	1.62	2.5	3.83	3.44	4.16	1.29176	1.84052e-09	2.94618e-08
GeneID:107796591	0.28	0.3	0.32	0.7	0.58	0.6	1.34498	0.00234502	0.0134059
GeneID:107816493	25.27	25.28	28.37	48.79	44.82	38.39	1.11865	5.3538e-18	1.84959e-16
GeneID:107776849	15.24	15.67	28.42	87.22	78.86	116.4	2.68146	4.5477e-45	6.25018e-43
novel.5096	3.17	3.82	1.75	5.04	6.97	5.29	1.40013	4.78122e-05	0.000402068
novel.16880	0	0.35	0.3	2.46	2.79	2.88	4.04381	7.04563e-10	1.18537e-08
GeneID:107801635	0	0	0	1.79	3.96	4.27	5.55252	0.000260469	0.0018887
GeneID:107778137	0.27	0.58	0.33	0.9	2.53	1.2	2.37713	0.000575128	0.00384682
novel.3955	3.98	3.98	4.57	5.93	9.28	6.43	1.17787	1.27255e-06	1.39112e-05
novel.5948	0.79	0.88	0.46	2.11	2.23	2.81	2.14082	8.21766e-11	1.52274e-09
novel.4173	3.72	4.72	5.09	11.01	10.56	12.89	1.74748	7.31647e-16	2.14182e-14
GeneID:107810749	0.23	0.31	0.41	0.74	0.8	1.08	1.8425	5.94218e-05	0.000490938
GeneID:107804699	5.23	4.82	5.17	13.18	10.61	10.29	1.56898	1.39377e-12	3.05521e-11
GeneID:107759107	22.59	21.19	23.05	38.98	46.36	43.98	1.32324	1.71179e-38	1.82539e-36
GeneID:107774295	18.62	18.99	22.48	52.18	44.47	41.79	1.60229	3.064e-31	2.34159e-29
GeneID:107814644	63.32	68.1	79.21	86.39	127.38	171.51	1.20474	2.9796e-13	6.96746e-12
novel.17306	14.83	28.57	10.72	103.28	83.97	107.93	3.21459	8.67897e-10	1.4457e-08
GeneID:107787003	0.16	0.13	0.11	0.25	0.36	0.57	1.9728	0.000772745	0.0050079
GeneID:107814792	5.01	4.49	5.16	6.7	8.3	9.12	1.08556	2.84936e-11	5.51703e-10
novel.13917	9.72	8.66	9.77	13.89	16.43	14.67	1.29711	0.000981164	0.00618844
GeneID:107768031	2.3	1.77	2.4	8.98	8.86	15.01	2.4538	1.09212e-12	2.41181e-11
GeneID:107821162	0.95	0.93	0.83	3.22	2.38	2.63	1.40637	4.6916e-06	4.68686e-05
GeneID:107761524	0.04	0.08	0.03	0.62	0.75	0.36	3.87824	3.6217e-05	0.000311095
novel.22307	0	0	0	1.45	0.68	0.2	6.90285	5.9608e-07	6.85805e-06
novel.9137	0	0	2.35	5.08	6.24	8.67	3.68577	0.00808893	0.0390877
novel.26338	1.07	0.46	1.04	5.13	4.33	3.27	2.69082	1.48468e-11	2.96812e-10
novel.2639	0	0	0	5.25	0.68	1.1	5.19274	0.00176252	0.0104123
GeneID:107783974	0.96	1	1.21	2.65	1.89	2.29	1.49008	2.41146e-06	2.52243e-05
novel.5088	0.2	1.61	1.56	3.06	3.25	4.67	2.15868	0.000487143	0.00331145
novel.3177	0.37	1.58	0.95	2.85	2.47	2.56	1.84343	5.57329e-06	5.50874e-05
novel.17451	0	2.02	0	4.47	9.43	4.15	4.01274	0.000240107	0.00175646
novel.16302	0.23	0.08	0.38	1.77	1.04	1.3	2.92943	3.46446e-08	4.72281e-07
novel.20459	1.65	1.02	2.31	4.33	6.11	8.69	2.31608	7.7299e-13	1.73244e-11
GeneID:107816090	1.55	1.29	2.1	3.6	4.17	4.98	1.76564	8.1395e-07	9.16681e-06
novel.18110	0.17	0.72	0.3	2.66	2.89	2.42	3.2182	3.20773e-05	0.000278189
GeneID:107806727	80.08	86.79	95.64	229.31	228.99	239.15	1.79344	3.81389e-91	1.79784e-88
GeneID:107806073	4.54	5.44	6	24	26.97	23.34	2.5479	1.13016e-38	1.22327e-36
GeneID:107793276	4.24	4.5	3.92	7.62	7.97	7.1	1.1885	1.76922e-09	2.83835e-08
novel.26157	0	0	1.23	3.22	7.35	4.55	4.09321	0.0106163	0.0490991
GeneID:107823160	3.35	2.96	3.15	6.35	4.93	5.37	1.19819	1.13692e-08	1.6488e-07
novel.27085	15.02	14.59	19.81	22.78	27.21	23.8	1.04429	4.92703e-14	1.237e-12
GeneID:107764046	2.09	2.47	3.78	5.38	3.52	6	1.23813	7.80217e-05	0.000630359
novel.20900	0.46	0.68	0.93	1.77	2.11	1.04	1.68329	0.00033803	0.0023856
GeneID:107796165	2.48	2.13	2.74	3.91	3.21	4.3	1.01469	0.00010727	0.00084238
novel.21503	1.83	2.83	2.56	9.69	10.4	8.22	2.51855	4.26332e-30	3.09407e-28
GeneID:107795962	0.31	0.29	0.21	0.66	1.26	1.06	2.23351	3.49688e-05	0.000301297
GeneID:107762226	4.42	7.37	6.09	9.14	9.7	8.97	1.04985	6.02087e-06	5.91866e-05
GeneID:107828739	2941.62	3028.96	2764.86	6456.15	6563.88	6082.68	1.50716	7.75174e-60	1.63594e-57
novel.20197	1.54	1.05	1.34	4.01	3.67	4.28	2.19981	0.0093316	0.0440998
novel.25862	0.78	0.7	0.94	8.88	14.08	13.14	4.31564	2.92881e-24	1.47138e-22
novel.17609	0.52	0	0.9	1.47	6.73	1.44	3.37593	0.00664627	0.0330147
novel.14814	1.18	1.05	1.42	2.11	3.29	1.95	1.39083	0.00281139	0.0157123
novel.4630	1.63	1.36	0.67	2.69	3.08	3.57	1.32928	0.00311778	0.0171641
novel.15328	0.7	1.11	0.31	2.2	2.06	1.8	1.9483	0.00148649	0.00892905
novel.23404	0.27	0.16	0.41	2.16	1.19	2.03	3.04435	1.38752e-10	2.50842e-09
novel.15770	0	0	0.13	1.66	2.43	2.12	5.75642	1.47819e-05	0.000136006
GeneID:107828295	39.93	38.03	56.84	173.57	183.53	167.94	2.4157	8.75834e-72	2.51001e-69
GeneID:107775086	0.62	0.73	3.07	2.81	3.22	3.13	1.44504	0.000956953	0.00605542
novel.22342	0	0.57	0.48	7.13	5.01	3.46	4.46585	0.00030498	0.00217457
GeneID:107819536	0.29	0.2	0.84	1.81	1.63	1.91	2.37232	5.66743e-08	7.50878e-07
GeneID:107828845	2.53	3.13	2.8	5.17	5.33	6.09	1.35132	5.32311e-10	9.08911e-09
GeneID:107777363	0.2	0	0.06	0.4	0.49	0.61	2.91884	0.00721322	0.0354538
GeneID:107781326	0.37	0.29	0.4	1.42	1.85	1.43	2.49728	5.3433e-14	1.33487e-12
GeneID:107806799	3.94	3.79	4	8.32	9.28	7.39	1.46118	8.17434e-22	3.53607e-20
novel.22306	6.92	6.7	7.44	13.77	9.34	10.79	1.0874	1.45424e-07	1.82192e-06
novel.23899	0.41	0	0.72	2.07	4.19	1.18	3.2618	0.00754511	0.0368332
novel.13126	0.8	0.28	0.84	1.9	2.32	2.57	2.24411	0.000404136	0.00279696
GeneID:107772538	0.19	0.25	0.25	1.16	1.22	1.11	2.72346	3.00462e-12	6.39182e-11
GeneID:107791855	5.02	5.78	6.77	31.15	32.05	35.52	2.85963	1.77465e-128	1.98915e-125
GeneID:107770278	839.83	840.16	968.87	3199.34	2943.58	2869.09	2.16083	1.64077e-121	1.45191e-118
GeneID:107794445	1.83	1.68	1.61	9.05	8.92	9.19	2.79397	2.58648e-33	2.20743e-31
novel.23772	0	0	0	1.45	1.41	2.7	5.487	0.000319812	0.00226559
GeneID:107805463	1.23	1.27	1.15	2.58	2.41	2.64	1.44133	1.86087e-14	4.8035e-13
GeneID:107772389	25.17	10.22	22.11	32.32	36.77	30.4	1.44552	2.63714e-05	0.000232219
GeneID:107822188	1.85	0.92	1.03	3.09	4.62	5.27	2.01928	8.50138e-07	9.5544e-06
GeneID:107804681	2.33	1.32	3.72	3.94	4.25	3.96	1.07308	0.0010408	0.00651082
novel.21932	7.99	5.95	7.91	12.73	10.73	10.59	1.03757	3.66542e-08	4.97927e-07
GeneID:107832144	0.17	0.18	0.26	0.65	0.43	0.95	2.11917	0.00504509	0.02603
novel.3271	0	0.61	0	2.97	3.41	2.04	4.392	0.00387536	0.0207285
GeneID:107826749	0	0.05	0.04	0.23	0.36	0.43	3.97377	0.00225527	0.0129531
novel.9873	0.47	0.54	0.75	1.66	1.1	0.63	1.30565	0.00263048	0.0148096
GeneID:107796174	0.72	1.11	1.33	3.48	2.26	2.58	1.7901	1.02046e-05	9.66229e-05
novel.8150	0.92	0.24	1.43	3.05	3.43	2.3	2.23013	0.00212625	0.0122834
GeneID:107794130	0.34	0.15	0.18	0.52	0.64	0.51	1.64896	0.00331652	0.0180865
novel.192	0.26	0	0.23	2.9	2.13	2.61	4.40364	0.000382397	0.00266479
GeneID:107795805	3.81	4.79	4.85	10.52	10.29	10.64	1.58783	1.07025e-37	1.10393e-35
GeneID:107764023	0.47	0.41	0.87	2.37	1.59	1.88	2.74584	5.26611e-15	1.41663e-13
GeneID:107782052	43.96	46.72	47.76	206.32	216.81	200.81	2.48329	6.45949e-164	1.20671e-160
novel.19185	0.67	1	0.49	5.89	6.75	6.86	3.62264	9.31324e-14	2.28589e-12
GeneID:107770349	14.03	16.83	16.13	31.9	38.53	43.05	1.31092	1.01169e-24	5.24448e-23
novel.23907	0	0	0	1.05	1.25	1.3	5.05006	0.001794	0.010571
novel.9966	0.14	0	0	0.62	2.3	0.67	5.05061	0.000501561	0.00340076
GeneID:107760163	11.69	12.13	12.37	26.3	27.58	24.16	1.4826	1.08494e-38	1.17685e-36
GeneID:107818450	127.07	137.31	147.13	296.33	257.2	251.79	1.3525	1.61865e-38	1.73708e-36
novel.21284	0.64	0.34	0.57	2.41	3.35	2.35	2.795	1.09674e-06	1.21206e-05
novel.24271	2.52	2.4	3.83	8.68	7.39	5.91	1.71234	2.04985e-15	5.76646e-14
GeneID:107781177	18.75	20.11	24.41	27.62	28.94	36.3	1.08006	1.59235e-16	4.91933e-15
novel.9367	0	0	0.27	1.72	1.13	1.54	4.3647	2.96292e-05	0.000258693
novel.14285	9.54	9.33	9.99	17.7	11.97	14.42	1.18643	0.00159643	0.0095169
novel.19362	0	0.25	0.21	0.7	2.13	1.29	3.64291	0.00795998	0.038557
novel.14187	3.4	3.78	3.44	5.95	6.93	5.56	1.17385	3.32151e-09	5.12963e-08
novel.4331	0.53	1.13	0.36	2	3.38	4.18	2.68762	8.45311e-06	8.09966e-05
GeneID:107826859	0.16	0.09	0.35	0.6	1.14	0.59	2.45064	0.000309259	0.00220103
novel.22910	0.22	0.12	0.2	0.93	1.53	1.36	3.22212	0.000413042	0.00285155
GeneID:107815856	0	0	0	0.02	0.16	0.12	4.67189	0.00888077	0.0422992
novel.17332	0.23	0.3	0.67	1.1	1.13	0.97	1.79499	0.000749123	0.00487234
novel.558	0	0	0	3.22	6.53	11.82	5.55379	0.000307469	0.00219045
GeneID:107794241	0.21	0.69	0.68	1.68	1.22	1.44	1.85003	0.000243741	0.0017802
novel.24185	1.12	0.2	0.67	11.83	8.32	8.97	4.32347	3.31737e-15	9.1235e-14
novel.2334	1.03	1.59	1.23	2.47	1.67	2.27	1.12123	0.00021262	0.00157179
GeneID:107809196	25.83	28.13	29.96	50.43	44.51	42.21	1.08645	1.00936e-21	4.34766e-20
GeneID:107771291	0.14	0.19	0.12	0.46	0.18	0.32	1.51726	0.00565607	0.0287558
GeneID:107802101	0.23	0.14	0.17	0.46	0.43	0.56	1.77543	0.00863383	0.0413484
novel.10760	0	0	1.44	7.69	17.97	13.73	5.25438	0.000185629	0.00138833
GeneID:107823679	0.21	0.22	1.33	5.05	6.27	6.46	3.75485	1.16701e-08	1.68984e-07
novel.12817	2.93	4.3	6.16	11.03	7.19	7.43	1.3775	3.32813e-05	0.000287888
novel.13166	0	0	0	3.7	15.8	18.77	4.97163	0.00354655	0.0191663
novel.11754	2.72	3.47	5.29	6.3	6.66	6.79	1.17586	2.88921e-06	2.9887e-05
GeneID:107762464	0.11	0.17	0.35	0.63	0.44	0.66	1.81498	6.49046e-05	0.000532053
novel.17555	2.21	1.47	1.64	27.34	24.21	23.35	3.12274	6.20286e-40	7.04653e-38
novel.9534	0.68	0	1.01	3.86	3.23	2.63	2.97337	0.000144967	0.00110821
novel.4588	17.93	21.01	25.77	109.92	109.32	102.47	2.71348	1.99499e-106	1.25202e-103
GeneID:107764823	1.09	0.9	2.01	3.01	2.63	1.39	1.23529	0.00865113	0.0414156
novel.11247	6.22	5.7	7.28	28.15	40.19	48.78	3.03515	1.56142e-45	2.18161e-43
novel.16001	0	0	0.28	3.26	1.36	1.43	4.69185	0.00153418	0.00918593
GeneID:107784058	2.31	2.31	2.85	7.79	7.03	7.73	1.76096	1.64026e-28	1.0829e-26
novel.18413	0.08	0.41	0.28	1.62	1.13	1.08	2.75578	0.000113054	0.0008834
novel.4713	2.59	4.65	3.57	6.48	8.35	4.63	1.28717	0.000365521	0.00255956
novel.12457	0.71	0.91	0.92	2.43	1.63	2.03	1.6472	6.98151e-07	7.94003e-06
GeneID:107760757	0.97	1.03	0.81	2.24	1.63	1.63	1.36395	7.12888e-06	6.91089e-05
novel.21153	0.74	1.03	0.88	3.26	4.01	5.28	2.73701	4.24438e-05	0.000360469
GeneID:107810643	0.61	0.72	0.92	1.09	2.79	1.61	1.67878	0.000121691	0.000944304
GeneID:107830351	94.93	98.8	98.81	191.12	184.88	170.8	1.26628	3.24067e-41	3.86421e-39
novel.16409	0	0.3	0	2.98	1.47	1.31	4.74716	0.00121372	0.00746846
GeneID:107797519	24.63	25.77	29.84	46.73	72.19	79.35	1.68999	2.62624e-28	1.70923e-26
novel.18863	0.21	0.05	0.23	3.3	1.94	2.3	4.30674	1.58582e-15	4.48862e-14
novel.2369	0.89	1.84	0.39	2.55	4.77	9.17	3.005	0.000374367	0.00261497
GeneID:107789083	1.62	1.05	2.41	4.45	5.69	3.96	1.10163	0.000405787	0.00280646
novel.27760	1.39	1.26	2.22	3.21	3.98	3.66	1.52	2.00732e-11	3.96115e-10
GeneID:107813036	7.94	11.38	9.33	13.1	17.49	14.57	1.21191	0.000503848	0.00341443
novel.14699	27.19	22.46	14.58	161.4	114.97	112.76	3.32839	2.2494e-26	1.29518e-24
GeneID:107820457	0.25	0.32	0.44	1.05	1.15	0.92	2.01842	6.53927e-11	1.22706e-09
GeneID:107793116	219.2	206.68	198.44	522.25	460.96	496.98	1.61638	8.40614e-58	1.68253e-55
GeneID:107804864	0.66	0.43	0.73	1.34	1.48	1.2	1.5467	9.7274e-05	0.000769753
novel.7536	1.05	0.9	1.26	2.91	2.53	2.11	1.62759	1.19043e-07	1.50826e-06
GeneID:107777546	0.1	0.1	0.08	0.3	0.19	0.23	1.96386	0.00135115	0.00822084
GeneID:107830799	2.13	3.12	2.94	3.71	6.2	4.77	1.23024	2.05789e-05	0.000184464
GeneID:107786337	1.6	1.69	1.14	29.56	34.71	37.55	2.75942	3.24817e-39	3.57995e-37
novel.7550	0.11	0.09	0.13	1.84	1.61	1.51	4.27399	2.20494e-16	6.7444e-15
novel.11501	0.25	0	0.11	1.04	0.8	0.71	3.22816	0.00636659	0.0318059
GeneID:107818010	1.05	1.05	1.27	1.87	2.27	1.81	1.21476	0.00389813	0.0208304
GeneID:107803455	47.78	41.15	52.22	105.33	99.12	94.63	1.47857	7.11057e-40	8.05955e-38
GeneID:107779542	18.21	18.32	19.88	32.68	36.09	38.07	1.06956	1.7429e-16	5.36365e-15
GeneID:107795914	2.07	1.92	2.1	2.92	4.02	3.87	1.25505	0.00298588	0.0165463
GeneID:107807653	39.85	36.54	41.58	94.91	97.69	74.01	1.578	5.99171e-34	5.29275e-32
GeneID:107779351	0.06	0.02	0.09	0.33	0.24	0.18	2.21119	0.00883906	0.0421353
GeneID:107778566	96.97	99.3	90.92	168.33	158.93	146.31	1.09691	1.09691e-25	6.10001e-24
novel.16538	0	0	0	35.71	51.74	18.16	10.0544	8.12784e-14	2.00078e-12
novel.18140	2.52	4.9	9.52	32.88	41.18	31.79	3.30434	7.43561e-06	7.19441e-05
GeneID:107772038	12.97	13.66	20.02	26.17	31.91	28.82	1.27753	7.71847e-19	2.79678e-17
novel.9975	0.67	0.71	1.09	2.43	1.71	1.63	1.65373	0.00816515	0.0394069
novel.912	3.23	3.45	3.46	8.6	14.1	14.07	2.25657	5.76708e-19	2.11707e-17
novel.25401	1.71	0.96	1.84	3.39	6.4	3.43	1.82532	5.46793e-06	5.41521e-05
novel.958	0.39	0	0.53	0.73	2.11	1.85	2.78215	0.00674747	0.0334679
GeneID:107816072	2.72	3.3	2.16	5.32	8.02	9.62	1.85905	2.11967e-14	5.43816e-13
novel.27780	0.3	1.62	1.46	37.62	56.32	62.65	6.15323	8.21845e-28	5.16227e-26
novel.5665	0.91	1.59	4.05	16	16.59	25.97	3.64774	2.199e-16	6.7303e-15
novel.2511	0.44	0	0.32	2.34	1.95	1.38	3.29194	3.20052e-06	3.28513e-05
novel.27779	0.6	0.47	1	1.65	2.9	2.97	2.21178	4.97001e-14	1.24611e-12
novel.7104	0.48	0	0.25	3.83	4.2	3.69	4.57048	5.04707e-12	1.0515e-10
GeneID:107807812	1.34	1.05	2.6	2.25	3.41	3.01	1.16977	0.000160981	0.00122175
GeneID:107832141	1.85	1.28	1.38	8.02	7.81	10.49	2.96067	4.20889e-26	2.39068e-24
novel.6000	1.86	0.94	1.57	3.25	4.32	10.66	2.75429	0.00671026	0.0332965
novel.13753	5.42	4.86	4.8	7.65	9.98	5.52	1.10693	0.00339403	0.0184553
novel.13562	0.56	0.59	0.7	2.36	1.44	1.91	2.04548	0.000826207	0.00530867
GeneID:107806009	6.44	7.65	9.82	22.83	22.19	22.25	1.87772	9.08813e-37	9.05921e-35
GeneID:107803960	9.44	10.15	10.34	14.97	15.02	15.95	1.00177	1.73197e-12	3.77196e-11
GeneID:107799146	0.7	0.68	0.74	1.28	1.64	1.51	1.45205	0.000387875	0.00269737
GeneID:107782642	0	0	0	0.17	0.37	0.65	4.66801	0.00787673	0.0382039
GeneID:107826683	2.22	1.8	2.17	3.29	3.71	3.03	1.06872	1.46271e-06	1.58137e-05
GeneID:107790065	18.26	18.38	34.3	105.83	87.9	80.64	2.51583	4.49992e-29	3.03844e-27
novel.11974	3.02	1.94	3.73	15.98	15.81	18.13	2.92526	7.17821e-32	5.65722e-30
novel.16202	2.28	2.58	2.5	5.89	5.72	4.82	1.52691	1.06468e-23	5.18354e-22
novel.4349	0.59	1.2	0.51	5.41	2.61	2.41	2.78641	0.0105768	0.0489525
GeneID:107825150	0.31	0	0.09	2.27	3.69	3.81	4.99593	3.02732e-09	4.707e-08
GeneID:107799900	69.79	68.84	60.44	154.7	143.16	144.25	1.37014	4.09815e-37	4.16747e-35
GeneID:107811625	0.27	0.29	0.17	0.9	1.42	0.9	2.55648	0.00144177	0.00869976
novel.18672	9.31	6.46	12.8	32.55	35.6	35.1	2.44635	3.72969e-15	1.02074e-13
GeneID:107830131	0.34	0.54	0.31	2.05	1.2	1.63	2.49472	0.0039209	0.0209363
novel.8635	0.69	0.53	1.1	2.05	2.74	2.73	2.07031	2.94182e-09	4.5797e-08
novel.26960	0.14	0	0	0.11	1.56	2.04	5.05568	0.000760113	0.00493682
GeneID:107776580	0.9	1.33	1.26	4.8	5.02	4.51	2.42143	3.41652e-21	1.42772e-19
novel.22324	0	0	2.82	3.23	5.69	6.15	2.99569	0.00403896	0.0214692
GeneID:107817081	0.24	0.33	0.42	0.75	1.07	0.7	1.71979	0.000302396	0.0021595
GeneID:107805377	6.04	5.76	8.42	12.61	17.18	17.41	1.62952	1.00125e-22	4.58694e-21
novel.25727	1.75	1.46	2.83	4.43	5.11	5.2	1.68094	1.70827e-08	2.42348e-07
GeneID:107784543	18.92	19.04	23.21	59.8	56.99	52.86	1.84592	5.49773e-64	1.30802e-61
novel.25047	2.79	4.37	4.27	8	8.87	9.63	1.58683	1.85376e-19	7.00387e-18
GeneID:107781899	36.81	40.31	44.78	64.06	77.15	79.63	1.25633	5.86169e-27	3.49477e-25
novel.13685	1.86	2.73	4.1	4.59	6.57	6.75	1.45763	3.74042e-05	0.000320419
GeneID:107762318	17.33	18.49	17.61	36.82	44.37	40.27	1.54746	6.42207e-55	1.20867e-52
GeneID:107825090	5.7	6.03	7.09	9.65	10.3	10.94	1.09578	6.01017e-11	1.13284e-09
novel.26042	0.27	0	0.72	3.38	3.76	2.26	3.6956	0.000158694	0.00120511
novel.17458	0	0.63	0.64	4.23	2.38	1.83	3.31603	0.00128935	0.00788188
GeneID:107829247	0.64	0.52	0.82	1.24	2.09	0.96	1.47885	0.000183743	0.00137682
GeneID:107759238	0.41	0.62	0.53	0.94	1.18	1.29	1.51379	0.000259429	0.00188251
novel.15203	1.16	1.02	0.86	2.75	3.98	3.1	2.07818	1.12174e-09	1.84298e-08
GeneID:107771861	88.49	92.22	112.08	314.79	337.23	380.61	2.20202	4.77082e-110	3.29638e-107
novel.17259	0	0.76	0	6.28	3.61	2.94	4.69501	0.00138995	0.00842946
novel.7299	0	0	0	23.35	13.96	30.12	4.54875	0.0106414	0.0492018
novel.5224	2.25	2.12	1.55	8.1	9.82	8.78	2.60326	6.13261e-14	1.52376e-12
novel.18206	0.68	0.73	1.11	3.64	4.25	4.95	2.732	2.08857e-13	4.96209e-12
novel.10113	7.2	4.89	5.15	9.58	11.37	10.66	1.33626	5.22919e-06	5.19051e-05
novel.167	0.12	0.07	0.11	2.05	1.77	1.15	4.41687	2.84354e-08	3.92409e-07
GeneID:107804273	14.13	16.29	19.16	63.08	64.84	68.9	3.74828	4.85484e-219	2.72082e-215
novel.15643	1.01	0.6	0.61	1.87	1.27	2.2	1.68668	0.00552535	0.0281907
novel.4078	0.92	0.47	0.81	3.95	0.92	5.86	2.83669	0.00554084	0.0282497
novel.12779	0.94	1	1.09	2.02	1.92	3.26	1.6766	0.00305152	0.0168582
GeneID:107817402	2.59	0.58	2.29	9.42	10.89	11.23	2.81156	3.29699e-16	9.92226e-15
novel.5526	0	0	0	0.85	0.63	1.09	4.54571	0.0103659	0.0481352
novel.9194	0	4.39	3.18	6.82	21.94	29.26	3.70742	0.00767798	0.0373632
GeneID:107802388	0.36	0.31	0.28	0.41	0.66	0.5	1.10405	0.00858437	0.0411506
GeneID:107813074	5.55	4.42	4.32	9.43	7.47	8.01	1.18477	1.0296e-09	1.69879e-08
GeneID:107819492	6.26	6.05	7.26	13.81	13.02	14.97	1.47007	6.15717e-25	3.22829e-23
novel.2966	0.79	0.63	1.96	6.05	6.49	5.02	2.77737	5.76375e-12	1.19785e-10
GeneID:107816980	1.08	1.21	1.21	2.16	1.81	1.77	1.09812	0.000819376	0.00526881
GeneID:107796636	5.78	6.13	5.57	11.83	11	10.92	1.32338	8.97874e-20	3.44919e-18
novel.20056	0.85	0.96	1.25	2.14	1.34	2.46	1.34321	0.000184678	0.00138266
novel.10813	5.06	5.4	5.07	10.6	14.05	12.84	1.64878	8.30676e-23	3.82984e-21
GeneID:107783684	9.34	9.92	11.76	22.73	26.27	24.88	1.63744	1.97827e-33	1.69986e-31
novel.9446	4.35	3.21	3.01	7.04	7.02	4.96	1.44599	0.00903536	0.0429236
novel.13307	2.74	2.04	2.16	3.63	3.48	3.25	1.00654	0.000835494	0.00536493
novel.19881	0.19	0	0.08	1.13	2.74	2.15	4.85542	9.34942e-07	1.04562e-05
GeneID:107778186	3.76	4.94	3.97	37.21	45	43.28	3.09004	1.43369e-72	4.2043e-70
GeneID:107801573	1.48	2	1.14	4.68	5.8	6.07	2.16004	5.99464e-10	1.01909e-08
GeneID:107759162	28.77	31.15	36.03	64.2	62.91	66.33	1.38571	4.00812e-43	5.11811e-41
GeneID:107817670	21.57	25.8	24.56	52.77	62.24	56.35	1.63974	4.74519e-45	6.50387e-43
GeneID:107830084	2.69	3.1	3	9.35	6.56	6.21	1.75449	1.59787e-08	2.27477e-07
novel.15659	1.56	0.96	1.81	5.5	4.34	5.01	2.19137	4.17487e-08	5.62887e-07
GeneID:107794750	4.54	4.17	4.44	8.48	7.98	6.87	1.25635	1.72381e-05	0.000156521
GeneID:107763782	1.3	1.64	1.65	2.59	2.23	2.67	1.08418	5.43277e-07	6.28264e-06
novel.271	2.06	1.68	1.31	4.04	3.8	3.46	1.58705	0.000201698	0.00149808
novel.23691	0	0	0	0.63	1.28	0.99	5.13553	0.00136946	0.0083182
novel.15095	0.63	0.72	0.89	1.57	2.23	1.57	1.6276	3.30965e-08	4.52399e-07
GeneID:107791351	0.1	0.21	0.09	0.44	1.43	0.64	3.09925	0.0034135	0.0185472
GeneID:107797533	0.62	1.14	0.52	1.81	1.73	1.76	1.60038	7.14457e-05	0.000580859
GeneID:107822724	8.28	6.23	8.61	11.75	11.81	12.49	1.14496	1.72614e-10	3.08303e-09
novel.22564	0.58	0.41	0.7	2.9	1.34	2.14	2.3716	0.0028832	0.0160585
GeneID:107801431	0.13	0	0	0.59	1.25	0.11	4.24915	0.00877617	0.0419028
novel.9112	1.94	2.27	2.09	2.88	3.78	3.13	1.04278	0.00471784	0.0245652
novel.10037	0	0	0.64	4.76	3.64	1.48	4.31728	0.00544765	0.0278499
GeneID:107760750	7.57	7.3	8.22	24.12	24.49	24.9	1.57277	2.52491e-39	2.81135e-37
novel.11494	9.12	10.31	9.13	46.2	49.76	30.69	2.76979	1.51731e-21	6.44749e-20
GeneID:107781027	6.68	5.83	8.45	125.06	151.13	140.35	3.42526	1.25701e-131	1.50958e-128
GeneID:107770424	4.14	2.5	4.28	11.28	12.41	12.47	2.20091	2.73351e-10	4.79234e-09
GeneID:107759417	1.5	1.36	2.55	3.56	4.62	4.07	1.55647	3.9505e-08	5.34207e-07
GeneID:107809323	12.98	13.12	13.84	28.93	25.2	26.24	1.38295	5.23412e-33	4.42217e-31
novel.10628	0.36	0.51	0.54	2.62	2.51	2.16	2.75471	1.52352e-09	2.4614e-08
GeneID:107819707	0.12	0.12	0.1	1.05	1.03	0.19	3.15952	0.00987737	0.0462457
novel.8027	1.14	1.06	2.06	5.17	3.73	3.11	1.92783	7.31789e-05	0.000594088
novel.6254	0.91	0	0	5.7	5.8	5.78	4.90752	0.000588818	0.00392797
novel.1240	0.82	0	0	52.61	47.97	40.32	7.87594	4.29538e-09	6.54743e-08
novel.23033	0.16	0	0	2.34	1.02	1.96	5.38667	9.23383e-05	0.000735309
novel.24257	0.09	0	0.16	1.57	1.27	1.92	4.64861	3.14614e-06	3.23392e-05
novel.16853	0.17	0.18	0.23	2.27	1.82	1.62	3.69558	3.40769e-07	4.04806e-06
GeneID:107825274	2.48	2.54	3.5	9.78	10.98	8.15	2.1751	1.0089e-14	2.6629e-13
novel.39	24.62	23.53	26.03	48.25	39.03	36.95	1.15705	6.98129e-15	1.86115e-13
novel.27242	0.82	0.85	0.73	3.79	3.18	3.3	2.60605	0.000461479	0.00315443
novel.8124	0	0	0.05	4.53	237.31	32.24	12.2053	6.36058e-07	7.28973e-06
GeneID:107803361	9.56	8.53	13.55	15.8	20.91	21.63	1.25732	5.60307e-15	1.50007e-13
GeneID:107812635	0.26	0.41	0.3	0.53	1.07	1.7	2.15367	0.000102903	0.000810611
novel.17804	0	0	0	4.27	8.26	5.78	4.96712	0.00273434	0.0153225
novel.24651	0.21	0.32	0.15	1.68	0.79	1.04	2.77149	1.87419e-06	1.99283e-05
novel.25011	7.27	4.84	7.97	8.82	9.27	13.48	1.2295	0.00341696	0.0185619
GeneID:107771624	4.52	5.13	6.35	20.8	21.27	19.91	2.33963	4.22111e-48	6.29906e-46
novel.23703	0.83	0.8	1.73	1.64	2.8	3.16	1.57063	0.000706163	0.00461854
novel.21960	2.33	1.51	2.33	16.21	29.28	31.76	4.03457	5.93585e-51	9.72073e-49
novel.13911	0.19	1.33	0.69	2.69	2.58	1.42	2.02418	0.000555803	0.00372944
GeneID:107784787	14.35	12.99	18.47	24.27	35.69	37.02	1.44265	7.04159e-25	3.678e-23
GeneID:107799333	0.13	0.05	0.16	0.65	0.64	0.72	2.90725	0.000139697	0.00107199
GeneID:107769757	0.86	0.83	0.89	1.48	1.5	1.74	1.25448	1.03023e-05	9.74933e-05
GeneID:107790665	1.57	1.72	1.84	3.09	3.44	2.22	1.15694	1.48686e-05	0.000136704
GeneID:107776232	3.35	3.16	3.19	4.98	5.04	6.4	1.09473	9.8249e-10	1.62745e-08
GeneID:107820380	10.87	15.37	23.09	29.67	62.13	47.82	1.92565	2.43454e-06	2.54499e-05
GeneID:107822684	407.55	433.33	477.19	2324.94	2890.49	3624.58	3.08495	3.36321e-145	4.98932e-142
GeneID:107761593	0.68	0.77	0.68	3.31	3.34	2.48	1.13828	4.61918e-06	4.62275e-05
GeneID:107761377	16.97	14.87	13.72	40.8	36.46	40.35	1.76596	1.25636e-34	1.14593e-32
GeneID:107759384	0.26	0.3	0.18	0.71	0.41	0.66	1.70505	0.000524805	0.0035417
novel.26495	1.58	1.69	2.55	5.06	4.85	3.53	1.60052	1.03161e-07	1.31964e-06
GeneID:107780524	0.26	0.36	0.34	0.49	1.06	0.83	1.66021	0.00225587	0.012954
GeneID:107797021	1.48	2.9	1.7	4.24	4.81	6.76	1.85288	0.000199963	0.00148584
GeneID:107830138	5.09	3.09	5.24	11.99	11.37	13.02	1.93522	1.12999e-07	1.4353e-06
GeneID:107823641	1.25	1.38	1.42	2.35	1.92	2.09	1.0324	0.000373217	0.00260802
GeneID:107795852	1.27	1.44	2.72	2.97	3.93	4.27	1.4277	2.48666e-05	0.000219981
GeneID:107811957	2.06	2.13	1.54	7.81	7.94	9.23	2.50691	2.7864e-31	2.13592e-29
GeneID:107785007	13.1	14.95	15.4	20.77	23.17	24.35	1.02728	3.06964e-18	1.07297e-16
GeneID:107813875	2.58	3.21	2.99	4.6	4.22	4.96	1.06799	3.56722e-07	4.22562e-06
GeneID:107763816	87.67	90.9	99.02	136.03	178.09	183.23	1.24159	1.5454e-28	1.02294e-26
GeneID:107828135	0.46	0.45	0.41	2.28	2.12	1.67	2.6531	1.9505e-13	4.64502e-12
novel.27209	1.28	1.36	1.98	1.89	2.67	2.82	1.04875	0.000285552	0.00205229
GeneID:107769890	23.88	25.42	32.55	42.5	46.62	48.88	1.08793	7.84532e-24	3.85682e-22
GeneID:107800981	1.44	1.54	1.54	2.46	2.21	2.52	1.07909	0.0101658	0.0473633
GeneID:107775768	2.51	2.5	3.44	28.26	30.89	28.29	3.71461	7.76446e-53	1.37899e-50
GeneID:107820566	0.15	0.39	0.26	0.67	0.78	1.03	2.03587	0.00706622	0.0348468
GeneID:107825754	0.81	1.88	1.45	4.48	3.41	4.77	2.06138	4.06972e-05	0.000346569
GeneID:107796732	3.86	4	5.2	7.14	6.36	7.5	1.06978	1.02801e-07	1.31564e-06
novel.4299	12.07	12.23	17.88	26.96	23.99	23.64	1.21251	3.00259e-15	8.28942e-14
novel.2188	1.51	0.92	1.37	1.7	2.5	2.1	1.11826	0.00758094	0.0369694
GeneID:107812390	0.39	0.42	0.71	1.7	1.11	1.21	1.82372	0.00586891	0.0296853
GeneID:107787203	4.1	5.65	4.46	17.48	19.42	21.56	2.02596	5.20819e-30	3.74744e-28
novel.25414	1.01	1.6	2.31	3.05	2.31	2.1	1.78939	9.84755e-07	1.09671e-05
novel.22115	3.78	3.65	4.9	8.71	9.87	8.75	1.65942	5.25989e-05	0.000438736
GeneID:107784500	0	0.13	0.04	0.45	0.2	0.36	3.07856	0.00393516	0.020996
novel.18323	1.21	1.28	0.9	6.89	4.45	4.1	2.66633	1.56907e-06	1.69107e-05
GeneID:107826438	1.57	1.62	2.29	4.5	4.18	3.29	1.51488	4.15762e-07	4.88597e-06
GeneID:107762623	0.96	1.06	1.41	2.21	2.87	2.32	1.52269	5.90101e-05	0.000488016
novel.11973	8.36	7.95	8.68	8.28	13.79	17.72	1.05246	1.98803e-06	2.10527e-05
novel.22653	0.34	1.49	1.82	3.38	3.68	4.62	2.59877	0.00641422	0.0320095
GeneID:107787091	29.53	30.87	36.39	50.49	65.8	57.4	1.23232	1.31213e-24	6.7533e-23
GeneID:107797518	40.73	41.88	55.53	112.77	125.79	126.1	1.84541	4.9071e-46	6.99178e-44
GeneID:107825292	0.1	0.03	0.15	0.32	0.41	0.3	2.25302	0.00569211	0.0289245
GeneID:107812405	1.86	2	2.77	5.65	5.3	5.95	1.73087	2.59144e-13	6.09369e-12
GeneID:107798653	1.55	1.16	1.73	22.31	22.04	17.16	4.09648	3.10195e-74	9.42527e-72
novel.16439	1.22	1.18	1.26	2.59	1.54	3.01	1.34083	4.87813e-07	5.67978e-06
novel.26602	2.09	2.03	3.09	4.56	3.56	4.6	1.14811	4.17827e-08	5.63195e-07
GeneID:107819690	2.46	1.91	1.91	3.62	4.8	4.97	1.46253	5.11894e-10	8.74937e-09
GeneID:107806027	2277.61	2387.28	2533.07	4821.11	4161.39	3848.11	1.21404	7.08377e-30	5.05372e-28
GeneID:107780326	3.7	2.1	6.55	9.53	8.77	5.22	1.45847	0.00342831	0.0186176
GeneID:107795211	3.16	3.95	4.48	5.98	8.33	9.64	1.57034	0.000593906	0.0039572
GeneID:107770883	9.89	10.1	11.77	16.49	21.05	20.1	1.22848	7.40822e-23	3.4344e-21
novel.25238	0.19	0.2	1.22	8.51	6.23	6.55	4.1342	4.45689e-11	8.47346e-10
GeneID:107813591	0.95	1.02	1.27	1.84	1.77	1.99	1.1702	0.00147271	0.00885889
novel.23071	3	2.13	2.77	6.78	4.98	7.48	1.66999	8.05856e-06	7.74515e-05
novel.17247	11.71	0	0	30.84	56.11	73.29	4.73015	4.27612e-06	4.30162e-05
GeneID:107779758	7.68	7.96	8.04	50.68	45.57	34.42	1.17303	2.95257e-16	8.92835e-15
GeneID:107821466	0.3	0.29	0.25	0.66	0.65	0.44	1.44904	0.00444999	0.0233246
GeneID:107772742	0.55	0.71	0.82	1.28	0.77	1.58	1.18809	0.00150547	0.00903012
novel.5606	6.2	5.96	7.39	15.32	17.41	17.31	1.74568	1.08832e-24	5.63014e-23
novel.19067	0.74	0.95	1.61	1.53	1.41	4.08	1.47283	0.003039	0.0167964
GeneID:107760279	18.45	17.1	22.93	32.47	33.07	27.45	1.05179	1.45946e-14	3.80628e-13
GeneID:107785710	2.2	2.5	2.31	2.88	5.49	4.86	1.28468	1.07865e-06	1.19337e-05
GeneID:107793427	0.09	0.04	0.05	0.34	0.44	0.5	3.2301	6.73338e-07	7.68382e-06
novel.6439	0	0.9	0.51	14.3	11.44	9.74	5.1751	2.83182e-12	6.04137e-11
GeneID:107786122	1	1.12	1.54	2.67	2.28	2.54	1.41481	9.01393e-06	8.59784e-05
GeneID:107769071	0.98	0.82	0.99	3.15	3.12	3.6	2.10682	2.01172e-28	1.31778e-26
novel.8268	0	0.29	0.12	1.76	0.76	1.89	3.86778	0.000408953	0.00282719
GeneID:107823686	7.53	7.52	8.72	14.98	16.38	16.34	1.3775	4.9824e-30	3.60039e-28
novel.21308	58.53	26.16	140.41	390.07	507.66	240.94	2.51455	0.000722944	0.00471728
novel.12626	33.81	34.43	41.63	155.41	162.01	146.33	2.45105	3.29469e-139	4.37318e-136
novel.14816	0.72	0.39	0.58	1.19	1.32	1.42	1.57597	2.72261e-05	0.00023941
novel.3936	0	0.13	0.32	0.54	2	1.35	3.50527	0.000709597	0.0046376
novel.13975	0.68	0.36	0.46	4.34	1.19	2.44	2.86087	0.000192625	0.00143513
novel.12530	0	0	0	13.88	4.75	8.37	6.24029	8.43737e-06	8.09073e-05
GeneID:107804264	2.01	2.51	3.01	6.8	6.81	6.5	1.79764	8.51552e-16	2.48274e-14
GeneID:107793603	2.32	1.95	2.33	3	3.81	3.68	1.03971	2.22847e-05	0.00019866
GeneID:107775425	68.61	61.8	68.21	166.85	143.7	132.84	1.53262	2.13193e-41	2.57254e-39
GeneID:107793599	1.75	2.03	1.52	2.34	3.2	3.26	1.05807	7.31587e-09	1.08276e-07
novel.25975	0	0	0	0.98	2.98	1.84	4.66897	0.0078569	0.0381199
novel.6062	0.08	0.09	0.37	0.41	0.46	0.38	1.56055	0.00859547	0.041196
novel.15831	0.91	0.85	0.71	2.38	2.25	2.51	1.93756	6.58595e-10	1.11174e-08
novel.22327	2.17	3.31	4.64	7.47	7.57	6.24	1.5024	1.19209e-05	0.000111658
novel.15148	2.69	2.29	1.94	3.04	4.17	6.3	1.39142	0.00096445	0.00609674
novel.27347	0	0.19	0.17	1.69	1.55	2.75	4.50577	0.000251397	0.00182904
GeneID:107820345	4.71	4.6	5.98	21.29	23.91	20.76	1.9256	8.72093e-34	7.65e-32
GeneID:107792850	1.91	2.5	1.94	3.23	3.98	4.19	1.21705	4.59653e-07	5.37298e-06
novel.27364	0.25	0.32	0.32	3.2	2.08	2.29	3.47488	5.24506e-13	1.19492e-11
GeneID:107817261	0.09	0.02	0.08	0.79	0.78	0.39	3.66141	4.55979e-08	6.12005e-07
novel.19991	0	0	2.02	10.52	27.75	17.66	5.61385	0.000245595	0.00179192
novel.834	2.02	2.52	2.99	6.94	7.18	7.31	1.87851	3.6256e-32	2.90272e-30
GeneID:107787626	5.09	5.06	3.8	6.12	7.63	7.74	1.01765	3.09979e-05	0.000269616
GeneID:107796920	2.49	2.45	2.64	3.77	5.21	5.21	1.28564	4.80144e-07	5.60083e-06
novel.12207	0	0	0	11.16	6.52	4.82	5.71192	0.000112093	0.000876571
GeneID:107791381	2.48	2.37	2.67	5.53	5.41	6.23	1.10303	4.20904e-08	5.6704e-07
GeneID:107774607	0.73	0.59	0.87	1.61	0.86	1.06	1.02544	0.00377988	0.0202801
novel.18273	0	0	0	6.78	6.71	5.08	6.00574	2.44022e-05	0.000216234
GeneID:107775554	16.95	16.33	22.29	31.95	40.03	41.48	1.42125	1.76545e-23	8.48883e-22
novel.24595	0.39	0	0	1.96	6.95	2.26	5.36423	0.000145109	0.00110913
GeneID:107768831	0.72	0.81	1.01	1.28	1.48	1.75	1.19881	0.000435994	0.00299321
GeneID:107797670	0.58	0.67	1.5	1.3	2.06	1.26	1.12841	0.0069676	0.0344143
GeneID:107769553	1.08	0.94	0.7	19.3	11.18	11.28	4.33633	7.43158e-47	1.08023e-44
GeneID:107816347	3.88	3.99	4.76	7.85	7.83	8.45	1.31711	2.01902e-12	4.35574e-11
novel.10606	0	0	0	7.36	2.76	1.21	5.12042	0.00187816	0.011009
GeneID:107813670	0.21	0.22	0.47	1.22	0.92	1.18	2.24645	0.000119598	0.000929873
GeneID:107822550	6.85	5.67	7.41	11.35	12.02	10.74	1.16646	3.173e-10	5.52825e-09
novel.25755	0.24	0.5	0.43	2.65	1.43	1.66	2.7816	0.00447565	0.0234348
novel.24882	0.08	0	0.21	2.6	1.09	1.1	4.41259	1.7876e-06	1.90785e-05
novel.8173	0.65	1.02	1.25	2.99	3.67	3.86	2.21996	1.23424e-15	3.54116e-14
novel.649	2.12	1.31	1.27	26.68	29.82	29.26	4.64988	1.11886e-42	1.40384e-40
GeneID:107781351	663.76	698.49	681.44	5671.7	6653.23	7870.98	3.6943	3.3516e-277	3.38102e-273
novel.14421	0.41	0.35	0.74	6.01	5.89	5.04	3.87773	1.1197e-18	4.02827e-17
novel.15704	6.89	6.28	11.46	23.25	29.6	29.24	2.12673	8.97557e-32	7.02979e-30
GeneID:107779986	28.28	28.63	32.13	69.57	88.05	97.76	1.78214	2.40889e-53	4.40226e-51
GeneID:107829302	0.69	0.66	0.84	1.86	2.46	1.73	1.86223	2.97096e-08	4.08763e-07
novel.3341	0.93	1.07	0.96	2.13	2.55	1.93	1.5312	1.80271e-07	2.22696e-06
novel.20461	0.55	0.29	0.24	1.6	3.79	2.9	3.46584	0.000491881	0.00334009
novel.13336	0.59	0.52	0.69	1.44	0.83	0.83	1.17064	0.000238243	0.00174434
GeneID:107826059	3.52	4.5	4.81	6.5	10.4	8.78	1.37232	1.76303e-13	4.22048e-12
novel.4240	0.66	0.67	0	7.85	2.84	7.03	4.40789	0.000392775	0.00272656
novel.26821	2.2	2.16	1.7	3.11	18.91	16.18	3.53167	0.00289881	0.0161348
GeneID:107768634	0.88	0.16	0.4	1.55	2.2	2.36	2.51933	0.000719832	0.00470002
GeneID:107764864	22.37	17.75	33.42	33.9	36.49	38.02	1.00789	2.04838e-07	2.51138e-06
novel.7790	3.2	4.1	4.34	14.8	21.44	20.72	2.706	8.65397e-30	6.10486e-28
GeneID:107794683	25.12	23.56	22.06	73.58	72.11	67.58	1.95465	1.50838e-78	5.39582e-76
novel.27488	0.26	0.69	0.47	2.35	2.28	2.73	2.81388	1.93523e-05	0.000174274
GeneID:107764896	3.28	2.68	5.78	10.13	7.81	7.29	1.47038	1.80769e-06	1.92562e-05
GeneID:107818549	14.63	14.43	17.27	33.79	32.64	31.08	1.40506	3.35497e-39	3.68674e-37
novel.16781	1.5	1.17	2.38	3.5	6.5	5.4	1.99959	2.38544e-09	3.7588e-08
novel.26663	0.84	1.49	0.9	4.9	3.7	1.52	2.17761	0.000856833	0.00548867
GeneID:107815408	6.2	7.25	6.4	17.23	20.01	23.89	1.99294	1.31906e-42	1.64683e-40
novel.19912	1.24	1.22	2.34	4.32	5.38	6.12	2.12492	2.15856e-08	3.03021e-07
GeneID:107828539	0.63	0.68	0.78	3.46	3.75	4.66	2.88158	5.90254e-26	3.3414e-24
novel.17212	0.61	0	2.1	5.58	6.88	5.36	3.29155	0.000446517	0.00305962
novel.24805	0.73	1.2	1.72	3.21	3.52	3.24	1.83552	9.32146e-08	1.19971e-06
GeneID:107776495	4.86	4.79	4.83	22.84	27.42	31.68	2.88075	4.71763e-72	1.36754e-69
GeneID:107830635	1.86	1.98	4.08	5.02	4.34	3.3	1.07218	0.000431658	0.00296707
GeneID:107790155	20.7	17.93	26.16	32.08	32.94	36.4	1.04634	2.74226e-13	6.43036e-12
GeneID:107776373	0.19	0.12	0.35	1	1.31	1.03	2.68612	1.54294e-11	3.07605e-10
GeneID:107786748	0.56	0.86	0.82	1.42	1.48	1.51	1.35407	0.000178295	0.00134124
GeneID:107814883	3.39	1.83	3.76	12.59	10.78	8.13	1.96344	4.78175e-08	6.40261e-07
GeneID:107789650	0.51	1.16	0.5	2.98	2.83	3.36	2.51346	3.82208e-13	8.84727e-12
GeneID:107783488	0	0.46	0.16	0.85	0.99	0.78	2.52346	0.00478787	0.0248733
novel.21697	22	21.19	22.75	60.5	62.71	61.31	1.60298	7.64209e-50	1.19337e-47
GeneID:107772944	595.23	673.44	693.17	1245.56	1175.88	1118.29	1.27688	2.17013e-42	2.69604e-40
GeneID:107810026	0.82	0.96	0.96	3.74	3.64	3.39	2.37863	4.87059e-09	7.36856e-08
GeneID:107759139	0.82	1.08	1.08	12.02	12.79	9.96	3.95985	3.63412e-32	2.90493e-30
GeneID:107820349	26.34	27.73	32.22	61.98	95.43	113.21	2.03429	1.3677e-37	1.405e-35
novel.1550	514.13	530.17	659.02	983.81	1099.21	1626.38	1.11989	3.08355e-21	1.29071e-19
novel.26943	0.26	0.28	0.23	1.37	2.28	2.1	3.33173	4.7946e-05	0.000402991
novel.8792	0.71	0.21	0.78	2.74	2.73	3.72	2.79429	2.17321e-14	5.56985e-13
GeneID:107831702	0.88	0.89	0.51	1.25	1.14	1.39	1.10286	0.00147971	0.00889363
GeneID:107770120	1.57	2.08	2.37	4.2	4.6	4.27	1.47852	3.74224e-12	7.8911e-11
novel.21977	0.44	0.47	0.93	2.97	3.72	2.08	2.63854	2.32567e-08	3.25123e-07
novel.12915	0.17	0.19	0.24	1.06	0.86	1.37	2.86165	0.000454858	0.00311255
novel.14353	0.37	0.25	0.44	2.22	1.67	0.8	2.73828	0.000807941	0.00520656
GeneID:107765829	79.02	83.92	89.73	354.47	352.37	330.8	1.16946	2.54147e-41	3.03766e-39
GeneID:107770127	14.12	13.91	13.26	24.45	24.56	25.51	1.25553	2.23171e-15	6.24321e-14
novel.26280	0.7	0.44	0.61	1.8	2.05	1.2	1.90236	1.68761e-06	1.8084e-05
novel.21807	0.11	0.35	0	2.1	0.89	1	3.58561	0.000316605	0.0022454
GeneID:107803104	3.06	3.33	4.2	7	7.25	9.51	1.64359	7.86647e-19	2.84836e-17
GeneID:107802028	1.17	1.52	1.54	2.85	3.04	3.08	1.49259	1.44074e-06	1.55843e-05
novel.14087	1.24	0.68	1.25	2.5	5.32	6.22	2.53734	2.0539e-12	4.42532e-11
GeneID:107800742	0.09	0.13	0.25	0.37	0.39	0.36	1.60479	0.000362724	0.00254138
novel.18385	2.34	3.56	4.65	6.44	6.13	8.34	1.39218	1.92085e-06	2.03755e-05
GeneID:107831930	792.35	847.97	771.35	2492.56	2219.26	1963.05	1.86062	3.41624e-62	7.55752e-60
novel.4559	0	0	0	6.57	1.78	3.27	5.04068	0.00212982	0.0123012
novel.282	6.38	7.05	9.05	18.66	21.81	17.85	1.76466	1.74806e-25	9.62559e-24
novel.5968	0.21	0.68	0.29	1.93	0.86	1.21	2.20592	0.00358544	0.0193496
GeneID:107769699	0.83	0.77	0.58	1.22	1.58	2.08	1.50131	5.1549e-05	0.000430976
novel.26827	0	0.4	0.34	3.57	3.68	0.55	3.9672	0.00344469	0.0186868
novel.23016	6.6	6.41	8.44	10.59	11	11.59	1.01513	2.11473e-09	3.36164e-08
novel.3089	21.31	25.25	37.96	52.98	63.31	70.7	1.51874	1.52687e-18	5.44267e-17
novel.23010	0.19	0.61	0	0.86	1.92	2.73	3.28092	0.00163598	0.00973537
GeneID:107814130	1.79	2.56	2.01	3.45	4.15	3.33	1.18566	0.000703003	0.00460005
novel.17667	0	0	0.55	4.02	4.35	2.99	4.75449	0.00109072	0.00678684
GeneID:107829801	4.09	4.07	8.44	7.67	9.64	10.36	1.14504	3.85625e-05	0.00032967
GeneID:107808812	0.35	0.28	0.21	0.79	1.42	0.93	2.25416	1.41254e-06	1.53121e-05
novel.1864	0	0.6	1.14	1.42	5.59	6.57	3.50183	1.66702e-06	1.78862e-05
novel.10459	0.39	0.9	0.49	3.56	3.78	3.78	3.03588	9.49507e-17	2.99326e-15
novel.1469	0	0	0	1.09	1.57	3.85	5.55188	0.000298247	0.00213319
novel.26562	0.38	0.44	0.51	1.15	1.15	1.25	1.78973	4.40023e-06	4.41942e-05
GeneID:107816732	6.82	6.61	7.91	76.82	72.05	60.69	3.70024	1.6642e-96	8.83586e-94
novel.23064	0	0	0	2.77	5.43	4.43	7.67963	1.4492e-09	2.3481e-08
novel.7546	0	0.68	0.58	4.25	3.31	4.92	3.92008	0.00266247	0.0149713
novel.13249	0.44	0.23	0.89	3.47	6	6.87	3.77549	5.22937e-13	1.19332e-11
GeneID:107813015	0.17	0.39	0.24	0.51	0.75	0.67	1.62332	0.000865511	0.00553582
GeneID:107801046	1.72	1.03	1.07	6.71	7.68	7.62	2.76931	5.1558e-27	3.0812e-25
GeneID:107832158	2.17	2.08	2.47	4.64	4.85	4.25	1.39839	1.90841e-16	5.86225e-15
novel.14308	1.94	1.7	3.12	42.7	74.01	88.52	5.34016	2.27677e-41	2.73424e-39
GeneID:107800339	1.62	0.2	0.34	13.39	8.4	9.3	4.05564	1.04133e-11	2.11617e-10
novel.16369	0.14	0.3	0.1	3.05	1.3	0.92	3.83155	9.42616e-12	1.92099e-10
GeneID:107819288	69.27	62.5	70.15	238.88	204.08	224.19	2.14631	3.5418e-88	1.54004e-85
GeneID:107812218	0.78	0.92	0.9	1.76	1.98	1.92	1.50849	7.88319e-08	1.02585e-06
GeneID:107762743	10	12.32	13.27	23.76	34.9	36.75	1.80131	5.6049e-30	4.02714e-28
novel.3780	1.57	3.1	1.26	107.33	111.14	149.68	6.73257	2.12763e-18	7.48889e-17
GeneID:107792806	7.29	5.67	10.21	50.86	49.15	49.35	3.06972	4.05791e-93	2.04677e-90
GeneID:107796745	0.53	0.57	0.61	2.16	2.89	1.89	1.36944	0.000334846	0.00236511
novel.9670	0.42	0.31	0.49	2.39	1.55	1.27	2.48307	5.11897e-08	6.83057e-07
GeneID:107772008	0.03	0.01	0.01	0.08	0.08	0.13	2.80227	0.00946281	0.0446445
GeneID:107761006	7.22	7.94	10.45	15.82	19.07	19.85	1.44144	8.76988e-26	4.90948e-24
GeneID:107823419	0.51	0.42	1.02	1.89	1.42	2.11	1.90175	0.000229622	0.00168611
GeneID:107789236	1139.38	1075.73	1170.51	1921.62	1646.18	1702.33	1.02004	2.84866e-25	1.54002e-23
novel.11695	0.45	0.63	0.81	3.14	7.89	5.04	3.51973	1.34682e-09	2.19066e-08
GeneID:107816551	0.17	0.34	0.26	1.8	1.9	1.44	3.16134	4.19796e-08	5.65699e-07
GeneID:107810506	0.86	0.66	0.89	3.12	3.4	2.89	2.32484	2.76419e-28	1.79207e-26
GeneID:107821691	0.88	1.04	1.4	12.77	14.85	13.85	4.01104	6.85374e-92	3.26128e-89
novel.19949	4.35	4.68	5.11	10.79	10.8	12.06	1.63281	1.00253e-21	4.32195e-20
GeneID:107774819	2.15	2.02	3.17	5.8	5.28	3.88	1.41283	1.30945e-08	1.88384e-07
novel.21808	0.37	0	0	1.24	1.85	2.18	4.31095	0.000618157	0.00410469
GeneID:107770877	1.16	0.84	0.9	1.29	1.68	2.23	1.19798	0.000447629	0.00306599
novel.8771	2.84	3.65	5.02	34.88	32.56	30.59	3.48703	9.69199e-78	3.32554e-75
GeneID:107828857	899	920.64	940.02	2435.67	2368.39	2489.86	1.77094	4.26027e-107	2.7907e-104
GeneID:107760380	1.83	1.78	1.36	2.41	2.4	3.17	1.08553	0.00603516	0.0303982
novel.26426	0	1.08	2.69	24.84	28.6	12.75	4.75711	6.47556e-08	8.5124e-07
GeneID:107799379	40.66	35.4	40.64	78.78	77.19	73.86	1.34275	3.2474e-44	4.33321e-42
GeneID:107782850	0	0	0	1.45	1.05	1.59	6.71432	4.89259e-07	5.6953e-06
novel.24274	0.2	0.22	0.18	0.91	1.71	1.91	3.38394	0.0031494	0.0173004
novel.15287	0.16	0	0.7	2.82	3.19	3.5	3.84718	1.13094e-06	1.24631e-05
GeneID:107793084	6	6.51	7.03	21.9	23.88	23.66	2.21065	8.6607e-56	1.64844e-53
novel.20604	0.7	0.59	0.59	7.62	6.23	5.53	3.79748	5.25142e-37	5.29752e-35
novel.17602	0.73	0.52	1.1	4.41	3.51	4.06	2.76703	3.5739e-08	4.86805e-07
novel.19033	1.96	2.74	3.18	6.9	12.36	13.19	2.4244	1.0368e-20	4.22076e-19
novel.8662	0	0	2.78	31.45	26.28	39.79	5.46169	6.12464e-05	0.000504608
novel.26566	0	0.82	0	2.28	4.84	4.22	4.46468	0.00324288	0.0177444
novel.20319	1.34	0.7	0.59	4.86	5.19	7.91	3.31388	4.18055e-06	4.21304e-05
GeneID:107795736	6.17	7.3	10.49	24.17	18.73	14.62	1.66189	1.40461e-15	4.0072e-14
novel.10761	0.74	0.76	0	1.86	2.8	2.95	2.93312	0.00602408	0.0303606
novel.27143	1.05	1.3	0.91	3.57	3.57	3.73	2.1085	5.19384e-19	1.9122e-17
GeneID:107776695	1.2	1.17	2.03	3.66	3.66	4.07	1.74249	8.84096e-13	1.97139e-11
GeneID:107828694	2.7	2.19	2.42	3.46	4.45	5.06	1.16105	3.69854e-07	4.36989e-06
novel.12336	0	0.03	0.21	1.25	0.62	1.72	4.30089	0.000457448	0.00312815
GeneID:107781289	177.5	179.94	208.26	399.79	372.17	400.79	1.42787	6.99849e-57	1.34219e-54
novel.21385	0.52	0.27	0.46	0.76	3.23	2.76	2.93182	0.00321435	0.0176093
novel.6403	0.23	0	0.74	5.07	2.59	4.61	4.24006	3.69687e-06	3.75637e-05
GeneID:107814237	0.69	0.61	0.78	1.47	1.14	1.52	1.36736	0.000672105	0.00442043
GeneID:107770163	0.37	0.38	0.42	0.89	1.27	0.82	1.72397	4.49596e-06	4.50839e-05
novel.243	0.22	0.17	0.06	1.41	1.26	0.68	3.27632	1.44096e-08	2.06361e-07
novel.9300	0	0	0	2.49	21.61	7.43	5.1432	0.00235431	0.0134499
GeneID:107816759	7.76	7.18	9.06	12.51	13.36	12	1.05597	6.55973e-09	9.77448e-08
GeneID:107803152	0.62	0.77	1.5	8.33	6.81	6.8	3.32664	3.22316e-17	1.0543e-15
novel.19244	0	0	0.33	0.27	2.32	3.8	4.59539	0.00328907	0.0179618
novel.23344	0.33	0.56	0.16	2.48	0.41	1.25	2.70055	0.00998764	0.0466883
novel.26911	0.47	0.74	2.29	9.48	6.1	5.76	3.07	6.45245e-08	8.48644e-07
GeneID:107768554	29.69	24.49	41.96	86.61	90.21	100.43	1.91674	2.71621e-42	3.35791e-40
novel.10626	0	1.02	0.85	4.96	5.21	5.74	3.75849	0.00474439	0.0246856
novel.1376	2.79	0.73	1.41	16.38	19.71	15	2.6425	0.000279457	0.00201278
GeneID:107814109	2.01	2.11	1.98	5.6	8.71	10	2.36642	6.64346e-23	3.09123e-21
novel.10722	0.47	0.76	0.86	1.39	1.57	2.04	1.64842	0.00174783	0.0103327
novel.6963	0.19	0.41	0.86	7.93	5.65	5.55	4.11151	1.07577e-17	3.64166e-16
novel.9008	0.44	0.65	0.63	3.32	2.08	2.96	2.69199	1.3913e-07	1.74784e-06
GeneID:107793343	9.6	9.63	11.23	24.51	22.19	21.54	1.56459	6.8069e-24	3.35614e-22
GeneID:107763890	20.08	22.54	22.99	77.04	62.17	50.17	1.68739	2.96748e-26	1.69317e-24
GeneID:107800541	5.39	5.15	5.44	11.79	13.03	14.82	1.59657	4.24437e-29	2.87358e-27
GeneID:107800936	27.59	25.76	27.43	64.11	61.18	56.2	1.53961	6.39633e-49	9.77651e-47
novel.3191	0	0.27	0.11	1.64	1.73	1.03	3.97267	0.000199347	0.00148171
novel.5571	0.87	0.36	0.64	4.89	3.21	3.78	3.03703	8.32638e-28	5.22356e-26
GeneID:107829710	5814.58	6252.63	6741.18	11725	11705.8	11166.8	1.25364	7.48628e-50	1.17267e-47
novel.17628	3.11	4.19	3.3	5.3	8.38	5.55	1.22797	3.92711e-09	6.01517e-08
novel.2796	0.89	0	0	5	2.09	3.43	4.16479	0.00796754	0.0385898
novel.3897	6.4	2.89	3.64	7.99	9.54	8.46	1.66855	0.00735303	0.0360527
GeneID:107797814	2.39	2.76	2	8.76	13.64	12.81	1.31703	5.57268e-12	1.15862e-10
novel.14650	0.72	0.63	0.67	2.06	1.63	2.24	1.92833	7.96935e-13	1.78414e-11
novel.19393	0.2	0.21	0.36	1.57	0.99	1.49	2.78308	1.59518e-05	0.000145742
novel.3551	1.46	1.19	2.53	2.03	3.89	4.76	1.40589	8.9678e-06	8.55591e-05
novel.24592	0.42	0.3	0.34	1.58	1.15	0.95	2.18071	3.12185e-05	0.000271441
novel.16726	0.68	0.66	0.56	0.8	1.03	2.07	1.4174	0.00863031	0.0413355
GeneID:107781986	0.72	1.46	0.61	10.1	3.06	6.65	3.44684	0.000569199	0.0038112
novel.131	0	1.77	1.41	26.38	16.74	17.65	4.91747	3.05639e-05	0.000266116
GeneID:107813210	24.05	19.92	20.14	30.72	35.05	35.66	1.06103	2.50298e-16	7.61906e-15
novel.5043	0.45	0.27	0.67	2.18	1.98	1.68	2.444	6.11003e-11	1.1508e-09
novel.14796	0.71	0.56	0.4	4.91	2.84	5.84	3.45423	6.20112e-19	2.26815e-17
novel.16935	5.5	6.03	8.25	18.44	15.15	13.37	1.66674	5.65974e-14	1.41253e-12
novel.13229	0	0.91	0	4.74	1.78	3.77	4.11474	0.00142185	0.00859391
GeneID:107765595	0.64	0.43	0.8	0.98	1.59	1.66	1.56597	0.00616183	0.0309497
novel.22232	0.5	1.06	1.69	4.53	4.2	3.55	2.33926	1.25315e-06	1.37051e-05
GeneID:107802543	0.79	1.35	1.1	4.06	4.29	3.48	2.0624	2.26843e-07	2.75838e-06
novel.10063	1.24	1.15	1.49	4.16	4.32	4.09	2.07855	8.83459e-12	1.80701e-10
GeneID:107807710	2.06	1.44	2.12	3.54	4.48	4.19	1.49695	1.68358e-09	2.70612e-08
GeneID:107816514	1.2	1.24	0.47	2.05	1.77	1.1	1.47857	0.00410791	0.0217852
novel.1841	1.4	1.49	1.75	4.32	5.05	7.76	2.29347	2.56921e-09	4.03076e-08
GeneID:107831462	9.14	9.74	9.25	19.57	24.51	23.4	1.60967	6.88681e-44	8.99906e-42
novel.19253	18.91	23.96	26.43	65.43	64.82	53.23	1.80093	4.11133e-29	2.791e-27
novel.9356	0	0	0.38	1.38	1.34	0.91	3.61838	0.00178808	0.0105423
novel.4159	23.54	25.78	45.25	88.91	97.36	102.45	2.01391	6.61512e-34	5.83322e-32
novel.7383	0	0	0.12	1.18	2.29	0.95	5.4283	8.1435e-05	0.000655312
novel.24569	0.21	0.15	0.13	1.28	0.52	1.4	3.1247	0.000109701	0.000859459
GeneID:107828174	0.69	0.67	0.19	2.69	1.66	1.79	2.40778	6.80316e-06	6.62058e-05
GeneID:107787642	0	0.03	0	0.09	0.09	0.08	3.52283	0.00196444	0.0114588
novel.22598	4.38	4.51	7.28	10	18.48	18.79	1.97436	9.4126e-12	1.91914e-10
novel.19705	0.71	1.44	1.21	7.99	6.5	2.35	2.95295	0.00247595	0.0140525
novel.15272	1.23	1.22	1.84	2.64	2.71	2	1.30151	9.31131e-09	1.36368e-07
GeneID:107829837	1.36	1.53	1.11	3.23	5.27	4.38	2.07656	1.59513e-09	2.56968e-08
novel.23129	0.97	0.62	1.52	3.25	3.55	3.02	2.04391	6.49282e-08	8.53286e-07
GeneID:107762017	1.49	1.54	2.31	16.35	12.48	14.05	3.38144	1.27038e-66	3.28599e-64
GeneID:107829701	0.22	0.14	0.1	0.54	0.3	0.43	2.03195	0.00577959	0.0292952
GeneID:107802837	7.97	8.69	8.85	12.9	15.48	15.54	1.08249	4.2051e-10	7.234e-09
GeneID:107814516	95.16	88.13	116.8	249.41	250.66	220.07	1.67375	5.27498e-51	8.66661e-49
GeneID:107793190	0	0.07	0	1.19	0.45	1.13	5.66663	2.91437e-05	0.000254939
novel.9002	0	0	0	3.96	1.55	1.59	6.62419	1.28147e-06	1.39935e-05
novel.667	0	0	0	4.78	0.67	0.36	4.94183	0.00513058	0.0264089
novel.8860	0.82	1.13	1.12	2.74	3	2.41	1.79961	1.00251e-06	1.11452e-05
novel.23063	0.11	0.45	0.67	4.76	3.97	6.37	4.01239	3.28858e-13	7.6651e-12
GeneID:107792567	0.37	0.29	0.18	0.65	0.68	0.46	1.4442	0.000654785	0.00431778
novel.8045	0.54	0.12	0.39	1.98	2.29	1.61	2.88442	3.3292e-05	0.000287932
novel.25240	2.33	2.39	4.04	6.27	4.13	3.89	1.09214	4.74721e-06	4.73866e-05
novel.19611	0.65	0.54	1.27	1.8	1.84	2.2	1.64373	3.97117e-05	0.000338634
novel.9445	0.22	0.14	0.2	2.46	2.71	2.16	4.10432	7.39526e-16	2.16363e-14
novel.18763	0.16	0.5	0	5.67	2.34	2.77	4.55052	3.46919e-07	4.11529e-06
GeneID:107815786	0.4	0.71	0.47	0.84	1.28	0.86	1.28167	0.00180793	0.0106381
GeneID:107782293	5.92	3.22	5.95	11.71	14.09	21.44	2.07106	1.01761e-12	2.25814e-11
novel.27383	0.41	0.43	0	1.7	2.57	0.98	3.11772	0.00308141	0.0169917
novel.9523	25.93	22.17	26.99	87.43	83.7	84.43	2.14703	2.39278e-92	1.18323e-89
novel.3744	3.1	3.4	3.11	8.22	7.59	6.46	1.61102	3.18995e-11	6.14348e-10
novel.17948	2.51	6.4	8.27	21.27	18.05	18.08	2.35225	3.41488e-07	4.05469e-06
novel.13863	2.33	2.62	4.67	6.25	9.61	8.29	1.75131	2.27298e-07	2.76191e-06
novel.24991	3.55	3.12	4.53	7.5	7.16	7.51	1.36443	1.86021e-12	4.02864e-11
GeneID:107766014	0.56	0.4	0.45	1.62	1.1	1.36	1.92169	0.000371186	0.00259455
novel.7263	0	0.39	0.17	2.22	4	3.81	4.65117	3.03416e-06	3.1271e-05
GeneID:107809702	2.08	1.04	0.85	3.42	3.72	3.28	1.80665	0.000140964	0.00108023
GeneID:107831065	6.86	7.3	7.71	16.24	13.28	11.06	1.27893	2.22061e-13	5.25846e-12
GeneID:107779194	3.22	3.11	3.98	6.09	5.44	6	1.13926	3.18772e-11	6.14154e-10
novel.559	0.11	0.46	0.87	1.62	1.82	1.67	2.24045	0.000971011	0.0061336
GeneID:107789442	3.51	4.15	3.01	8.01	8.77	7.78	1.61451	1.35137e-09	2.19734e-08
GeneID:107830743	23.74	18.9	23.71	38.97	29.76	34.12	1.02403	3.27409e-11	6.30072e-10
GeneID:107826295	0.7	0.85	0.7	2.26	2.81	2.47	2.10306	1.1988e-06	1.31534e-05
novel.14664	0	0	2.88	14.1	9.46	6.34	3.9054	0.00372965	0.0200426
novel.27739	0.21	0.67	0.57	1.73	2.72	1.65	2.55252	0.00325993	0.01783
novel.7488	0.06	0.31	0.41	0.74	0.57	1.19	2.07843	0.00346364	0.0187751
novel.17148	14.02	16.12	18.99	54.09	59.84	52.4	2.1701	1.28658e-53	2.36839e-51
GeneID:107808042	416.12	351.74	445.97	697.29	827.1	845.86	1.33485	4.74023e-43	6.03769e-41
GeneID:107810818	0.63	0.54	0.8	2.54	2.77	2.15	2.31751	6.41916e-08	8.45148e-07
novel.23165	8.1	0	1.33	74.23	85.89	54.51	5.49504	5.68728e-05	0.000471733
GeneID:107825185	0.62	0.58	0.74	2.96	3.16	2.93	2.5577	5.67017e-30	4.06246e-28
GeneID:107787019	2.04	2.06	2.61	5.76	5.73	6.41	1.7571	3.50896e-17	1.14113e-15
novel.22003	0.12	0.25	0.21	1.07	1.05	0.96	2.83009	0.00322842	0.0176729
GeneID:107823561	0.6	0.56	0.58	0.83	1.02	1.49	1.30941	0.00333791	0.0181835
GeneID:107830452	5.57	5.54	5.79	10.22	10.04	8.82	1.09144	9.06172e-18	3.0841e-16
GeneID:107788411	16.84	17.33	18.25	26.56	27.61	30.17	1.09884	5.56876e-16	1.64934e-14
GeneID:107828342	4.82	5.99	11.2	23.28	49.48	39.44	2.79661	5.69576e-23	2.66008e-21
GeneID:107815529	71.61	74.26	81.29	292.28	239.39	231.2	2.13269	1.5116e-76	5.11703e-74
GeneID:107796742	667.44	745.16	724.16	8944.54	9244.24	10776.9	3.4754	1.54819e-285	3.90445e-281
novel.15520	0.8	0.51	1.16	2.17	2.14	6.04	2.49104	9.60505e-05	0.000761385
GeneID:107792776	16.2	18.53	21.05	32.06	35.54	28.59	1.22004	1.40483e-12	3.07812e-11
novel.27199	0.63	0.88	0.97	4.15	4.34	3.73	2.68031	5.76571e-21	2.38374e-19
novel.24183	0.53	0.28	0.47	1.96	2.15	4.86	3.2886	0.000381932	0.00266192
GeneID:107823330	11.7	12.43	14.34	11.22	12.09	12.77	1.14856	3.81737e-08	5.17176e-07
GeneID:107780204	1.6	1.49	1.54	3.54	2.37	2.95	1.31448	1.77371e-07	2.19383e-06
novel.1097	1.8	3.07	1.56	6.37	3.79	6.53	1.98792	0.00883518	0.0421287
novel.26007	138.48	110.14	129.97	259.04	293.84	251.02	1.82905	1.06734e-20	4.33809e-19
GeneID:107792549	2.87	2.81	3.78	3.19	7.97	7.88	1.39956	2.5131e-05	0.000222188
GeneID:107827937	0.1	0	0.09	0.63	2.68	2.29	5.19351	1.45301e-05	0.000133836
novel.2692	2.03	2.41	2.23	4.16	4.25	4.61	1.33369	2.02846e-13	4.82612e-12
novel.8476	0	0	0	3.65	0.27	0.56	4.94156	0.00513429	0.0264227
novel.8224	7.69	7.19	6.06	13.56	20.36	12.93	1.81184	0.000108628	0.000851978
novel.27289	2.42	2.88	3.77	6.67	6.71	9.71	1.73769	1.82084e-11	3.60445e-10
GeneID:107794415	32.63	37.38	37.35	71.12	65.7	62.81	1.27115	9.49624e-33	7.83929e-31
novel.23912	6.11	5.78	6.75	16.32	18.05	17.84	1.85388	3.26014e-53	5.91505e-51
GeneID:107772787	0.22	0.12	0.1	5.23	7.02	6.47	5.83079	1.48998e-13	3.59412e-12
novel.9668	2.39	2.57	0.98	4.38	2.36	1.96	2.50724	3.65309e-12	7.70633e-11
novel.16876	0	0	0.64	3.18	4.55	2.97	4.4614	0.00314599	0.0172858
novel.8273	0.34	0.18	0.88	1.01	1.2	1.11	1.60878	0.00576278	0.0292335
GeneID:107797923	4.11	4.23	2.73	29.87	33.93	33.48	3.48623	7.54926e-73	2.23987e-70
novel.18665	0.79	1.2	3	3.84	7.04	6.79	2.27212	9.6841e-08	1.24384e-06
novel.20619	3.13	2.88	2.99	4.82	4.78	4.69	1.02849	1.53285e-16	4.75203e-15
GeneID:107805171	5.1	5.54	6.72	23.58	22.8	24.85	2.41825	4.4546e-69	1.18881e-66
novel.987	2.5	2.56	3.11	4.27	5.08	5.48	1.27044	0.000124852	0.000966899
GeneID:107808169	1.43	1.95	1.98	4.13	4.01	3.8	1.49112	5.99836e-08	7.92642e-07
novel.20462	0.76	2.32	1.3	4.82	8.73	7	2.91141	0.00100878	0.00633565
GeneID:107801829	0.02	0.02	0.05	0.14	0.24	0.06	2.72144	0.00841345	0.0404158
GeneID:107787159	0.3	0.55	0.66	1.29	1.89	1.71	2.06017	2.05852e-06	2.17581e-05
GeneID:107765378	0.15	0.31	0	1.55	0.46	1.42	3.38727	0.00379483	0.020343
GeneID:107773309	1.91	1.74	1.87	3.56	3.9	4.53	1.48507	1.3669e-12	2.99893e-11
GeneID:107765281	0.13	0.07	0.12	1.45	0.65	0.77	3.56647	6.04701e-05	0.000499109
GeneID:107763950	2.54	2.88	3.54	5.77	6.35	4.98	1.31027	2.36236e-10	4.16627e-09
GeneID:107805958	236.29	214.57	220.79	838.52	901.61	834.59	2.32533	4.78276e-151	7.31023e-148
novel.20919	1.84	1.92	1.79	4.77	4.09	3.79	1.56837	6.13447e-12	1.27175e-10
GeneID:107795088	22.9	23.95	23.23	66.57	60.04	71.44	1.80015	9.4685e-66	2.39991e-63
GeneID:107815169	12.58	11.18	15.9	29.08	27.04	23.35	1.36573	1.26662e-19	4.8253e-18
novel.13188	0.48	0.28	0.15	1.57	1.16	1.14	2.5999	0.00244075	0.013873
novel.26056	4.92	3.44	6.46	6.46	7.36	17.01	1.47667	4.93245e-05	0.000413681
novel.15528	19.3	17.85	22.85	113.57	121.08	131.1	3.01631	5.88523e-142	8.2457e-139
novel.11000	0.66	0.83	1.12	1.76	1.58	2.12	1.42923	1.93646e-10	3.44161e-09
novel.13744	1.55	1.59	2.13	10.76	14.53	14.93	3.29905	3.57671e-63	8.23771e-61
novel.1894	2.95	2.24	4.18	3.18	6.69	6.24	1.20725	0.0025502	0.0144317
novel.7504	4.16	6.69	9.76	14.29	12.78	13.75	1.59088	0.000626792	0.00415601
GeneID:107804149	4.15	5.2	4.88	7.57	7.48	6.98	1.00546	7.6072e-10	1.27475e-08
novel.14003	2.7	2.52	3.05	5.87	4.63	4.69	1.30091	0.000146214	0.00111707
novel.25702	0	0.12	0.73	0.96	1.3	1.69	2.60192	0.00311258	0.0171392
novel.644	0.11	0.2	0.34	5.53	4.29	4.88	4.87627	2.79982e-32	2.25231e-30
GeneID:107816552	0.1	0.2	0.08	0.3	0.34	0.26	1.63367	0.00156718	0.00936686
novel.5365	2.75	1.48	2.56	3.26	6.43	7.13	1.69112	4.66736e-07	5.44821e-06
novel.11261	0.69	2.17	2	9.6	11.88	19.28	2.96619	1.08827e-06	1.20323e-05
novel.17642	0	0	0.18	0.9	0.15	2.05	4.32127	0.00738174	0.0361624
novel.8876	0.41	0.72	0.51	2.67	1.95	1.32	2.31816	0.000903454	0.0057508
GeneID:107791652	272.65	267.16	306.79	527.6	489.27	526.33	1.25014	6.73494e-46	9.56911e-44
novel.20212	1.09	0.98	1.9	5.14	5.75	4.62	2.32922	3.18764e-29	2.18453e-27
novel.22699	0	0	0	27.53	22.76	28.21	8.27413	2.0182e-11	3.97952e-10
novel.15550	0.71	1.14	1.63	2.55	3.08	2.66	1.58537	2.58182e-10	4.53903e-09
novel.23518	0.14	0.06	0.23	1.36	1.09	0.87	3.28741	6.87067e-10	1.15748e-08
GeneID:107815003	66.19	61.08	67.78	311.7	333.76	352.29	2.46714	2.70416e-187	7.5775e-184
novel.21254	0.33	0.7	0	3.88	2.83	1.24	3.52756	0.00203749	0.0118425
novel.9421	1.07	0.52	1.55	3.19	3.93	2.17	1.93917	1.63318e-08	2.32372e-07
novel.11426	0	3.23	4.87	55.67	100.67	58.1	5.41064	2.02376e-08	2.8489e-07
GeneID:107761258	560.18	504.45	609.2	730.48	916.43	980.72	1.01959	6.36384e-24	3.14384e-22
GeneID:107784302	2.11	2.06	2.34	3.9	5.27	5.86	1.57789	1.23735e-11	2.49642e-10
novel.9339	0.57	0.3	0.25	3.19	6.61	5.7	4.22805	9.58048e-11	1.7604e-09
novel.5144	0	0	0	8.28	8.71	0.88	5.28145	0.00126035	0.00772521
GeneID:107790068	6.35	7.75	7.73	19.46	23.23	24.1	1.86963	4.39483e-30	3.18493e-28
GeneID:107805890	0.35	0.23	0.37	1.11	1.37	1.36	2.38807	3.49835e-12	7.40157e-11
GeneID:107767058	4.75	5.08	7.12	9.87	9.58	10.99	1.22135	4.60517e-13	1.06016e-11
novel.18856	0	0.26	0.22	2.33	0.59	1.1	3.49519	0.000717046	0.00468425
novel.23393	3.79	3.14	3.11	5.71	6.5	6.15	1.26044	1.61642e-07	2.01161e-06
novel.14573	1.17	1.4	1.24	3.93	3.19	2.69	1.77073	1.41166e-06	1.53058e-05
novel.6300	2.39	1	2.56	5.11	7.46	6.25	2.14298	2.02808e-05	0.000182083
GeneID:107773282	0.25	0.14	0.27	0.49	0.57	0.64	1.73858	0.00879607	0.04197
novel.4047	0	0.76	0.43	2.12	1.43	4.43	3.24093	0.000674277	0.00443298
novel.12852	0	0	0	3.79	4.41	8.98	5.35846	0.000607827	0.00404248
GeneID:107827145	3.6	4.4	4.06	10.42	10.22	9.6	1.72777	5.08602e-15	1.37037e-13
GeneID:107806602	1.47	1.2	1.46	2.53	2.56	2.55	1.28198	1.40147e-05	0.000129633
novel.2204	1.41	1.22	1.58	3	2.96	3.71	1.57026	2.34131e-11	4.58438e-10
GeneID:107828332	10.29	9.75	15.36	21.75	22.61	24.22	1.33312	4.71997e-19	1.74539e-17
GeneID:107781187	4.29	4.23	5.28	12.31	14.25	12.44	1.9605	3.10559e-25	1.67175e-23
GeneID:107785174	1.05	1.13	1.58	3.76	6.4	6.56	2.62946	2.5256e-30	1.85427e-28
novel.4969	0.9	1.75	2.57	3.66	4.79	3.57	1.52248	6.67525e-07	7.62093e-06
novel.27737	0.64	0.69	1.41	1.43	1.93	2.97	1.58444	0.000208132	0.00154268
novel.12381	8.88	8.38	11.75	12.63	10.94	11.15	1.24979	2.91913e-10	5.10357e-09
novel.20759	0.57	0.48	1.24	1.94	2.41	2.01	1.83926	7.47137e-10	1.25324e-08
GeneID:107761688	0.4	0.42	0.5	0.96	0.94	1.15	1.61753	0.00333401	0.0181701
GeneID:107805374	0.2	0.04	0.14	0.61	0.77	0.63	2.7525	9.87816e-05	0.000780796
GeneID:107766003	0.43	0.46	0.78	10.86	8.1	13.24	4.6854	3.73025e-20	1.47684e-18
GeneID:107782376	0.26	0.26	0.32	0.67	0.67	0.75	1.48973	0.00295162	0.0163871
GeneID:107828113	83.6	82.22	87.04	233.83	208.31	167.94	1.1031	9.0109e-22	3.89127e-20
GeneID:107816434	0.24	0.56	0.64	0.63	0.78	1.25	1.25347	0.00699167	0.0345196
novel.2118	0.92	0.93	1.54	6.42	7.47	8.77	3.40802	0.000593534	0.00395525
novel.15397	0.67	0.6	1.71	2.2	2.07	3.01	1.69792	0.00173213	0.0102471
novel.20575	1.07	1.64	0.92	4.16	5.51	2.21	2.33282	0.00986969	0.046214
GeneID:107808210	1.96	2.57	2.82	5.75	3.65	2.87	1.15962	0.00160315	0.00955015
novel.1191	11.04	7.34	14.09	115.39	75	73.31	3.68625	2.74523e-23	1.30138e-21
GeneID:107766625	1.49	1.98	1.58	7.85	7.08	5.36	1.11992	2.37308e-06	2.48487e-05
novel.9522	25.93	22.17	26.99	87.43	83.7	84.43	2.14703	2.39278e-92	1.18323e-89
GeneID:107774890	0.52	0.86	0.61	1.77	1.45	1.02	1.48589	1.4632e-05	0.000134745
GeneID:107768115	3.03	3.57	2.51	7.37	6.26	6.02	1.50005	1.34055e-13	3.24453e-12
GeneID:107825831	1.16	1.61	1.39	1.93	2.35	2.93	1.10628	0.00900966	0.0428296
GeneID:107772896	2.52	4.86	2.86	7.29	10.03	7.38	1.82294	0.000265497	0.00192157
novel.18899	0.62	0.93	0.63	1.71	0.98	1.46	1.32261	0.000221992	0.00163389
novel.7535	0	0	0	4.6	1.48	1.29	5.80777	9.9951e-05	0.00078945
GeneID:107779394	5.07	4.36	5.78	14.43	14.23	12.61	1.81808	2.43076e-28	1.58589e-26
novel.14048	0.49	0.67	1.7	1.43	1.96	1.97	1.29899	0.00870124	0.0416002
GeneID:107817835	3.27	3.02	3.69	5.15	6.37	5.4	1.00832	2.92023e-07	3.49783e-06
GeneID:107802419	8.42	9.58	11.88	18.02	18.67	17.57	1.25025	1.64341e-16	5.06676e-15
GeneID:107804902	0.78	0.39	0.53	0.98	0.96	0.85	1.12729	0.00204023	0.0118556
GeneID:107829956	0.03	0.09	0.28	0.76	0.41	0.39	2.33298	0.000794807	0.00513439
novel.3491	0	0	0	5.55	1.03	2.26	4.85725	0.00450726	0.0235905
GeneID:107827176	10.97	12.58	10.9	54.14	57.32	56.82	2.67452	6.50945e-116	5.05123e-113
novel.12853	0.45	0.48	0.31	1.38	1.14	1.52	2.09448	7.92965e-05	0.000640249
GeneID:107795597	9.47	9.84	12.28	13.62	19.12	18.44	1.06842	4.85007e-13	1.11348e-11
novel.21047	0	0.59	0.33	1.05	1.73	0.61	2.30022	0.00534961	0.0274161
GeneID:107818739	6.34	5.31	6.12	21.65	29.42	20.52	2.39055	1.68072e-26	9.78913e-25
GeneID:107816490	0.18	0.19	0.2	0.57	0.52	0.56	1.93239	0.00567784	0.0288578
GeneID:107760172	1.47	1.54	2.01	2.79	2.78	2.44	1.04415	8.17335e-09	1.20367e-07
GeneID:107786511	0.81	0.69	0.51	1.24	1.23	1.5	1.35896	0.000936584	0.00594368
novel.26802	1.63	1.65	2.06	3.52	3.34	4.55	1.46282	2.73794e-13	6.42321e-12
GeneID:107819725	0.76	0.7	0.88	1.81	1.72	1.69	1.51	3.13261e-06	3.22067e-05
GeneID:107790211	1.08	1.61	1.46	11.96	15.31	9.47	3.56492	6.15576e-26	3.47694e-24
novel.3940	23.68	25.62	22.76	72.67	77.82	74.04	2.04402	2.49237e-65	6.22339e-63
novel.11851	2.06	1.61	1.34	3.48	3.1	4.53	1.5788	0.000120841	0.000938433
novel.22380	0.38	0.31	0.38	1.6	1.88	2	2.79083	2.63638e-09	4.12586e-08
novel.13603	0	2.2	1.82	11.47	17.87	17.68	4.24636	2.967e-06	3.06163e-05
GeneID:107785366	8.06	6.25	12.33	12.74	16.61	18.87	1.23237	1.72336e-10	3.07915e-09
novel.15562	0	3.57	0	21.61	16.08	7.98	4.39029	0.00404261	0.0214818
GeneID:107765362	3.16	2.55	3.41	6.85	6.75	6.78	1.52823	2.89998e-20	1.15356e-18
novel.18152	0.63	0.72	0.77	4.27	3.39	3.87	2.80038	6.15193e-82	2.2985e-79
GeneID:107759359	0.97	0.72	0.82	1.66	1.12	2.39	1.44937	0.00114865	0.00710271
GeneID:107807991	0.52	0.42	0.84	2.17	3.34	6.46	3.07325	2.53131e-07	3.05446e-06
novel.7428	5.44	8.98	17.08	28.11	28.87	38.1	2.08265	5.59159e-13	1.26928e-11
GeneID:107829635	158.63	157.89	169.51	353.94	361.48	352.36	1.49306	3.29672e-78	1.15474e-75
GeneID:107780742	0.45	0.47	0.91	0.95	1.67	1.11	1.74781	7.46825e-05	0.000605515
novel.26928	0.48	0.39	0.88	1.71	1.2	0.96	1.52428	0.00081856	0.00526423
novel.8970	1.84	2.3	2.97	4.13	5.45	6.05	1.5081	8.86673e-11	1.6364e-09
novel.4823	3.57	4	3.69	6.54	7.09	8.61	1.36392	8.97978e-11	1.65666e-09
GeneID:107822527	217.91	223.06	254.37	407.73	379.38	363.43	1.09354	7.40563e-31	5.56681e-29
GeneID:107785468	3.15	3.47	3.7	6.54	5.7	6.51	1.23126	2.39101e-16	7.28701e-15
GeneID:107806972	19.02	19.08	22.47	36.83	40.17	31.59	1.23219	8.74644e-21	3.58086e-19
novel.13049	0.54	0.7	0.86	1.81	2.16	1.57	1.80072	1.75824e-06	1.87929e-05
GeneID:107781345	1.61	1.87	4.28	3.04	3.97	10.77	1.63164	0.00159787	0.00952434
GeneID:107819470	0.15	0.22	0.24	0.65	0.4	0.42	1.67174	0.0052342	0.026882
GeneID:107809718	0.39	0.41	0.69	0.72	0.94	0.9	1.1421	1.65536e-05	0.000150685
novel.22554	0.07	0.21	0.11	1.76	1.49	1.5	3.96346	4.82606e-17	1.55046e-15
GeneID:107799129	5.3	7.22	6.1	12.9	14.17	10.82	1.64625	0.00052178	0.00352317
novel.10433	5.52	6.87	3.36	11.56	17.15	24.85	2.53489	0.00021646	0.0015969
GeneID:107789268	1.57	1.17	0.73	4.58	3.62	2.72	2.16727	0.00762618	0.0371398
novel.3709	0.78	0	2	2.2	6.57	6.13	3.49824	0.00396428	0.0211123
novel.25058	0.25	0.27	0	2.06	2.44	2.33	4.26098	0.000623704	0.00413771
GeneID:107762122	0.15	0.25	0.4	0.81	0.88	1.02	2.26069	0.00289999	0.0161395
novel.13751	0.41	0.06	0.27	0.99	1.88	1.44	2.89833	3.85805e-06	3.90599e-05
novel.9081	0.16	0	0	3.57	2.56	2.09	6.01744	4.38279e-06	4.40278e-05
novel.13478	6.26	8.43	9.15	16.03	12.91	17.96	1.41026	4.56358e-09	6.92695e-08
GeneID:107810777	1.53	1.41	1.19	2.2	2.86	2.03	1.11091	1.12309e-06	1.2382e-05
novel.20262	0	0	1.3	4.82	5.06	7.5	4.27762	0.000854767	0.00547822
GeneID:107766653	0.43	0.5	1.36	2.7	2.39	1.69	1.28946	0.00741642	0.0363005
novel.22322	7.28	9.56	14.99	58.14	61.2	60.84	2.9615	4.36236e-48	6.49064e-46
GeneID:107790270	258.75	193.42	270.78	417.22	385.3	342.28	1.10801	4.74032e-20	1.86503e-18
novel.14813	2.33	2.4	3	4.84	4.04	2.89	1.02117	0.00343046	0.0186253
novel.27064	0	0	0	1.6	0.45	1.87	5.04475	0.00227046	0.0130239
GeneID:107826219	0.45	0.44	0.61	1.53	2.39	2.32	2.41434	2.53489e-10	4.45807e-09
GeneID:107767668	2.05	2.59	3.27	4.26	3.84	4.23	1.02674	3.95504e-05	0.000337429
GeneID:107808460	1.28	1.58	1.48	2.28	4.32	2.88	1.5227	1.58876e-05	0.000145328
novel.8767	6.31	0	8.33	349.56	307.2	308.04	6.59408	1.03627e-13	2.52871e-12
GeneID:107802044	2.64	3.41	1.38	37.3	30.09	40.61	4.45041	3.72662e-57	7.25741e-55
novel.8722	0.36	0.46	1.06	2.3	3.07	2.86	2.48752	4.39416e-16	1.30837e-14
GeneID:107823994	2.13	2.37	3.78	7	6.61	6.48	1.54262	2.07951e-15	5.84336e-14
novel.1406	0	0	0	3.57	0.56	1.49	5.19688	0.00146211	0.00880252
GeneID:107815713	0.25	0.21	0.28	0.28	0.75	0.59	1.49654	0.0079161	0.0383601
novel.27506	4.84	5.39	7.64	14.9	24.79	25.31	1.71711	1.10971e-15	3.19845e-14
novel.25153	11.97	9.22	11.27	28.45	22.05	26.07	1.71486	1.34231e-10	2.4293e-09
GeneID:107781110	26.03	27.4	29.83	62.72	62.25	67.06	1.57644	3.44483e-65	8.47581e-63
GeneID:107800494	58.48	60.22	53.18	109.6	86.37	73.42	1.02072	6.57231e-13	1.48389e-11
GeneID:107789926	193.68	163.15	174.36	364.76	284.38	264.48	1.17641	3.53011e-19	1.31599e-17
novel.3083	0.83	0.79	0.43	1.41	1.23	1.4	1.35322	0.000108871	0.000853624
GeneID:107814744	3.27	2.37	3.47	10.45	9.46	10.21	2.09744	7.35773e-33	6.18528e-31
GeneID:107785642	0.36	0.27	0.13	0.73	0.76	0.55	1.85315	0.000568614	0.0038078
GeneID:107759092	33.28	35.63	45.18	68.02	82.07	73.49	1.36008	8.51386e-31	6.36193e-29
GeneID:107825677	150.24	142.3	155.5	727.4	766.18	866.53	2.68804	3.49473e-211	1.46892e-207
novel.19310	0.21	0.34	0.29	1.76	1.97	2.17	3.23778	6.22745e-06	6.09915e-05
novel.5920	1.68	0	2.5	6.53	11.52	10.86	3.41518	1.26585e-07	1.59661e-06
GeneID:107815403	22.1	23.23	18.07	35.68	40.44	36.97	1.0592	6.10216e-17	1.95049e-15
novel.110	0.14	0.9	1.41	2.03	1.68	2.4	1.74987	0.00948606	0.0447333
GeneID:107820379	70.9	67.66	99.06	108.12	164.53	123.86	1.16288	2.97765e-14	7.57003e-13
novel.11866	7.6	0	4.87	35.93	54.74	19.91	3.82996	0.00463375	0.0241698
GeneID:107800166	2.03	1.97	2.31	5.3	5.21	5.75	1.69585	5.70933e-35	5.27423e-33
novel.4749	2.09	2.25	1.48	4.75	3.91	5.72	1.66612	2.09235e-19	7.89942e-18
GeneID:107771586	84.29	89.57	84.02	149.66	195.92	235.48	1.53396	3.50635e-36	3.40109e-34
novel.7954	1.98	3.05	2.94	4.3	4.68	5.59	1.26235	7.47819e-06	7.23284e-05
GeneID:107772507	0.72	0.52	0.92	1.3	2.39	2.08	1.7817	3.47517e-06	3.54294e-05
GeneID:107782154	16.56	14.55	33.08	47	57.82	58.34	1.80487	3.43377e-16	1.0297e-14
novel.15771	4.52	1.87	5.84	12.69	12.45	14.92	2.11406	1.31016e-14	3.43469e-13
novel.20035	0	0	1.98	9.28	15.57	11.03	4.46489	0.00334978	0.0182363
GeneID:107830771	0.86	1.02	1.11	1.18	2.06	1.82	1.12667	0.00306318	0.0169103
GeneID:107817037	1.26	1.6	1.5	7.81	12.54	10.17	2.55209	8.67038e-19	3.1372e-17
GeneID:107830006	3.02	2.6	3.43	7.78	7.76	7.03	1.49248	5.13571e-13	1.17371e-11
novel.13064	0	0	0.43	4.23	12.96	9.33	6.31068	1.48151e-06	1.60081e-05
novel.17584	3.19	2.56	4.55	7.85	6.39	6.23	1.39319	4.87459e-07	5.67697e-06
novel.10607	0.17	0	0	2.72	1.03	3.16	5.75065	2.06464e-05	0.00018497
novel.7192	0	0	0	22.86	11.43	11.88	6.76411	3.88668e-07	4.58466e-06
GeneID:107812655	0.09	0.15	0.26	0.58	1.74	1.03	3.09964	4.24832e-06	4.27707e-05
novel.20067	0	0	0	4.14	11.88	7.05	5.72379	0.000138299	0.00106239
novel.27444	0.52	0.81	0.69	2.85	4.37	6.5	3.26174	9.13379e-06	8.70558e-05
novel.3542	2.87	1.68	5.51	8.06	7.05	8.45	1.63547	6.00227e-09	8.98631e-08
novel.6755	19.83	15.1	15.27	110.41	114.71	131.97	3.59805	6.96006e-19	2.53577e-17
GeneID:107793663	1.08	1.26	1.38	1.99	2.13	2.13	1.11694	1.60824e-06	1.72997e-05
GeneID:107793219	0.19	0.3	0.35	0.81	1.21	0.56	1.97484	0.00195248	0.0113996
novel.20237	0	1.52	2.47	8.6	13.88	11.82	3.7947	0.000604386	0.00402278
novel.18214	7.72	6.84	9.18	12.37	13.77	22.46	1.40824	6.849e-13	1.5427e-11
GeneID:107782751	1.54	1.76	2.65	6.83	8.43	9.15	2.40516	1.24078e-31	9.6729e-30
GeneID:107797368	4.7	3.79	4.35	8.16	9.71	7.4	1.39664	6.00626e-07	6.90562e-06
novel.21443	5.75	2.3	1.9	5.61	12.81	11.32	2.35985	0.00394331	0.0210317
GeneID:107766430	64.96	61.12	98.61	225.53	214.33	232.14	1.95619	4.89039e-50	7.7568e-48
novel.21705	0.46	0	0.63	2.42	1.86	1.93	2.87871	1.87762e-06	1.99547e-05
novel.5553	0.46	0.75	0.91	1.18	1.92	1.35	1.4648	0.00684331	0.0338903
GeneID:107815580	4.26	3.07	5.49	25.87	20.21	22.99	2.7853	4.16082e-44	5.49392e-42
novel.6832	3.82	3.91	4.72	10.22	9.07	11.97	1.76227	1.33021e-09	2.16574e-08
GeneID:107800794	0.86	0.51	1.04	3.77	1.64	3.07	2.2273	1.59528e-05	0.000145742
novel.14613	0.13	0.14	0	2.29	1.79	1.07	4.73243	8.49774e-05	0.000681535
novel.14235	1.53	1.62	2.02	4.81	5.07	4.97	1.8963	5.70549e-19	2.09599e-17
GeneID:107770165	0.16	0.09	1.11	3.59	6.68	3.06	3.11267	3.78399e-05	0.000323822
novel.5865	7.8	6	8.25	166.54	263.63	260.44	5.48319	2.40615e-131	2.82241e-128
novel.5341	0	0	0	3.32	1.46	1.36	6.50706	2.31237e-06	2.4228e-05
GeneID:107758990	15.34	13.86	16.45	31.71	24.33	24.68	1.21453	1.12949e-15	3.25172e-14
novel.11784	0	0	0	1.53	3.12	3.34	5.42639	0.000435971	0.00299321
GeneID:107820616	1.21	0.81	1.86	2.03	1.95	2.46	1.12235	0.0095042	0.0448014
novel.18023	14.39	15.38	20.12	28.12	31.09	37.42	1.65566	1.38302e-05	0.00012802
GeneID:107770161	0.35	0.37	0.49	0.58	0.51	1.18	1.31356	0.00875081	0.0418015
GeneID:107796178	0.72	0.82	0.75	1.99	1.41	1.35	1.43661	7.26511e-05	0.000590278
GeneID:107779977	1.04	0.83	1.19	2.86	2.19	2.13	1.61539	1.10638e-07	1.40779e-06
novel.18683	0.44	0	0.77	4.43	5.92	5.97	4.27477	3.71825e-05	0.000318683
novel.6096	0.53	0.55	0	7.19	7.57	8.47	5.09856	1.07245e-05	0.000101109
novel.8524	0.39	0.2	0.69	5.05	2.82	3.5	3.58232	1.79901e-06	1.9184e-05
GeneID:107795118	0.77	0.33	0.26	2.17	1.75	2.46	2.0737	8.69698e-07	9.75682e-06
novel.3817	9.43	8.36	14.38	21.14	20.25	20.52	1.41679	1.70788e-08	2.42348e-07
GeneID:107760264	73.93	68.84	83.24	289.03	296.92	270.81	2.26079	1.02979e-126	1.10514e-123
novel.22531	0.89	0.62	1.75	4.56	3.41	4.91	2.52855	0.000313578	0.00222549
novel.25725	0.73	0.4	0.67	3.49	3.64	3.08	3.07647	1.00268e-05	9.5046e-05
novel.5057	0	2.16	0	12.44	12.23	7.47	4.64407	0.00164963	0.00980276
novel.2972	0	0	0	5.26	4.94	2.7	5.54488	0.000245043	0.00178841
GeneID:107818780	0.7	1.38	0.87	1.18	1.4	2.92	1.26505	0.00155808	0.00931577
novel.25364	1.28	1.26	1.78	4.25	5.2	6.62	2.30158	6.52879e-10	1.10246e-08
novel.796	1.64	2.32	2.85	4.77	6.35	5.05	1.6149	5.36246e-15	1.44024e-13
GeneID:107769353	72	69.11	73.06	143.58	131.2	129.65	1.29145	1.30745e-40	1.51254e-38
novel.24513	1.04	0.99	1.26	6.23	6.26	5.87	2.89927	6.84021e-13	1.54161e-11
novel.5760	1.6	1.42	1.28	2.59	1.74	2.33	1.00838	0.000215706	0.00159181
GeneID:107784006	5.85	6.05	6.36	10.12	12.61	10.82	1.15465	3.55343e-20	1.40905e-18
novel.21613	1.49	1.72	2.12	3.61	4.5	3.92	1.65735	4.60068e-12	9.62878e-11
GeneID:107760687	11.35	11.4	13.12	17.03	20.85	23.14	1.12011	1.80892e-17	6.04639e-16
GeneID:107821152	0.33	0.07	0.3	0.75	1.03	0.55	2.12902	0.00556159	0.0283383
novel.10982	0.53	1.34	1.83	3.97	3.69	4.42	2.10767	0.00094184	0.00597252
GeneID:107794768	0.17	0.18	0.11	0.4	0.29	0.69	1.93272	0.00152497	0.00913626
GeneID:107777571	9.85	8.75	10.37	29.54	26.69	30.28	1.9577	1.56021e-51	2.60581e-49
novel.19573	0	0.57	0	5.15	4.65	7.3	5.49257	5.13701e-05	0.000429623
GeneID:107759714	0	0	0	2.48	9.89	6.32	7.34476	2.53192e-08	3.51714e-07
novel.10963	0	0	0	21.79	37.34	30.87	6.58192	1.40347e-06	1.52236e-05
GeneID:107770048	1.18	1.45	1.75	2.77	3.06	3.4	1.44788	7.02178e-12	1.44501e-10
GeneID:107814989	2.25	1.96	2.64	3.87	3.91	4.08	1.19262	0.00026213	0.00189883
novel.20879	6.15	0	7.28	40.4	56.74	66.32	4.05119	0.00697497	0.0344473
GeneID:107816383	0.7	1.01	0.98	1.37	2.13	1.19	1.184	0.00392128	0.0209363
GeneID:107776548	0.16	0.21	0.19	0.41	0.52	0.46	1.70812	0.000283691	0.00204066
GeneID:107820439	40.76	39.46	43.39	121.18	128.36	115.55	1.955	1.34143e-85	5.63838e-83
GeneID:107804890	0.78	0.8	0.73	1.63	1.31	1.22	1.18223	8.72147e-06	8.3378e-05
GeneID:107821519	0.83	0.79	2.5	2.94	4.22	4.94	1.95167	8.20926e-06	7.88398e-05
novel.19706	0	6.24	0	20.5	39.15	66.64	5.82773	9.98708e-05	0.00078894
GeneID:107825667	1.77	1.89	3.12	5.99	5.66	6.15	1.79458	1.15518e-08	1.67431e-07
novel.6623	1.84	1.35	0.99	3.64	3.31	3.19	1.68815	1.7568e-05	0.000159144
GeneID:107823504	9.43	8.41	9.11	15.6	13.45	11.71	1.03035	7.24301e-06	7.01479e-05
novel.23264	0.37	0.13	1	4.82	3.63	4.71	3.4991	6.02813e-16	1.78121e-14
GeneID:107785685	62.84	57.32	72.21	107.48	106.96	117.46	1.16417	4.52189e-33	3.83973e-31
novel.9889	0	0	0.35	1.29	2.51	3.49	4.76006	0.00011273	0.000881004
GeneID:107801906	0.24	0.25	0.46	0.6	0.83	0.67	1.51137	0.00748775	0.0365999
GeneID:107804155	0.42	0.5	0.28	0.99	1.33	0.98	1.78679	8.32586e-06	7.98988e-05
novel.9713	9.95	9.58	8.69	16.66	18.96	23.31	1.44084	6.50299e-20	2.52894e-18
novel.24779	0.13	0.28	0	1.78	2.2	0.96	4.08096	0.000116365	0.000906463
GeneID:107819375	4.89	6.81	6.19	10.99	12.77	12.98	1.50127	1.21417e-23	5.88862e-22
GeneID:107785436	26.62	29.59	39.7	132.89	155.8	136.74	2.48042	2.30486e-90	1.06656e-87
novel.8641	0	0	0	2.25	1.1	0.92	5.20163	0.00111874	0.00693647
GeneID:107778691	0.31	0.53	0.5	1.04	1.6	1.3	2.03815	0.000211025	0.00156161
GeneID:107803821	20.37	22.02	20.94	40.37	52.59	49.28	1.53519	5.20849e-44	6.84144e-42
GeneID:107824882	5.66	4.51	7.51	12.44	15.06	14.52	1.62568	2.22816e-23	1.06225e-21
novel.19786	0.74	0.44	1.06	4.75	5.2	5.25	3.16244	3.35618e-15	9.21515e-14
novel.3325	1.28	0.55	0.8	1.53	2.27	2.51	1.79323	0.00350213	0.0189573
GeneID:107777964	7.67	8.11	6.92	12.56	12.54	10.89	1.0431	1.5917e-11	3.17202e-10
novel.27250	0.71	0.38	0.64	7.71	13.49	13.81	4.78393	8.40173e-18	2.86528e-16
GeneID:107822271	1.18	0.7	1.96	1.65	1.86	3.07	1.15873	0.0077333	0.037607
novel.8272	1.46	1.28	2.82	3.39	3.17	3.14	1.19299	6.53827e-05	0.000535711
novel.23821	0.96	0.97	0.81	10.12	5.5	2.47	3.32108	0.00473959	0.0246657
GeneID:107811534	0.58	0.5	0.53	0.98	1.31	1.46	1.60671	0.0017811	0.0105085
GeneID:107792592	0.52	0.9	0.97	1.68	1.82	1.71	1.50709	4.38444e-05	0.000371363
novel.20091	40.15	34.68	50.42	89.61	82.3	92.77	1.48728	1.37655e-31	1.06983e-29
novel.18363	1.37	1.45	1.54	3.59	4.26	2.72	1.73181	0.000979253	0.00617715
GeneID:107816440	11.29	10.23	11.6	20.13	18.57	17.53	1.10814	1.25873e-16	3.93122e-15
novel.7828	1.4	1.15	1.54	2.1	4.03	4.48	1.80871	0.000581882	0.00388581
novel.1031	0.16	0.08	0.28	1.72	0.96	0.58	3.04592	0.000278914	0.00200916
GeneID:107813773	6.82	6.36	7.75	9.71	7.69	8.65	1.0041	5.8842e-13	1.3327e-11
novel.17410	3.31	4.54	5.94	10.12	12.34	9.74	1.61763	4.67875e-13	1.0766e-11
novel.10341	56.78	57.09	76.13	178.26	155.36	125.53	1.61971	4.33016e-28	2.78288e-26
GeneID:107776631	2.14	2.58	3.28	4.42	5.48	3.72	1.1113	2.23922e-07	2.72613e-06
GeneID:107817446	83.02	91.05	96.93	163.12	152.06	148.13	1.16437	5.72437e-32	4.53267e-30
GeneID:107815961	1.37	3.31	2.63	6.27	6.89	10.46	2.1547	5.11794e-07	5.94254e-06
novel.3223	0	0	0	0.66	4.29	0.65	5.14135	0.00238293	0.0135934
GeneID:107810375	2.52	2.57	4.12	3.17	3.75	4.22	1.27343	0.000497325	0.003374
novel.1807	0.5	0	0.66	4.02	3.12	2.47	3.50912	8.79649e-05	0.000703259
novel.3731	0.29	0.46	1.42	2.05	3.73	4.95	2.72416	1.02518e-05	9.70329e-05
GeneID:107801784	6.28	7.16	6.64	17.89	23.77	30.02	1.84031	2.5331e-38	2.68418e-36
novel.7732	0.47	0.33	0.71	12.83	7.99	13.3	4.92159	2.54431e-19	9.58419e-18
novel.4634	0	0	0	5.12	3.52	3.14	6.34983	4.01548e-06	4.05885e-05
GeneID:107792595	4.68	4.41	4.44	6.89	9.27	9.47	1.28612	1.42214e-15	4.04803e-14
novel.5145	0.14	0.15	1.3	1.85	1.6	1.86	2.14725	0.00648935	0.0323307
GeneID:107785224	8.93	13.17	22.32	17.21	23.48	29	1.3257	0.00260144	0.0146755
novel.25874	0	0	0	2.25	3.41	0.37	5.04892	0.00282744	0.0157915
GeneID:107812152	0.12	0.17	0.15	0.28	0.3	0.44	1.56941	0.00118674	0.0073158
GeneID:107820082	0.33	0.2	0.24	0.44	0.37	0.54	1.16992	0.0020392	0.011851
novel.24969	0	0	0	6.21	7.13	4.4	5.28472	0.000739088	0.0048108
GeneID:107766856	24.01	26.93	28.13	43.53	46.09	44.41	1.13132	1.27141e-32	1.04274e-30
novel.8300	2.66	6.53	0	59.93	46.39	37.48	4.64739	5.34699e-06	5.2996e-05
GeneID:107806472	75.31	74.52	114.36	126.08	172.61	192.89	1.31303	1.82631e-17	6.10049e-16
GeneID:107782380	0.59	0.53	0.58	1.81	1.06	1.21	1.63707	7.41202e-07	8.38992e-06
novel.14980	4.46	5.82	4.77	5.18	5.77	7.44	1.2269	5.81241e-08	7.68875e-07
GeneID:107764414	2.27	2.14	3.56	6.03	5.84	6.07	1.69388	6.24755e-11	1.17494e-09
novel.2290	3.52	3.67	3.96	6.01	5.15	7.32	1.13235	3.7449e-05	0.000320743
novel.15444	0	0	0	18.56	6.96	7.76	5.95462	3.61732e-05	0.000310858
novel.20484	0.69	1.41	3.57	5.85	7.23	4.15	2.22515	0.00817881	0.0394691
GeneID:107831951	0.04	0.1	0.12	0.41	0.6	0.45	2.85774	0.00121974	0.00750275
GeneID:107823420	3.77	2.68	3.66	8.35	9.82	7.71	1.46452	2.08488e-11	4.10939e-10
GeneID:107777619	12.08	11.56	12.74	22.58	28.26	27.42	1.4654	8.78392e-47	1.27314e-44
novel.11753	1.14	1.53	2.33	2.24	3.2	2.62	1.08021	0.00450638	0.0235883
GeneID:107801365	29.95	27.22	32.38	58.96	53.72	41.09	1.08951	2.62303e-16	7.97007e-15
novel.20954	1.28	0	0.37	29.74	19.6	23.82	6.03219	1.52545e-14	3.9661e-13
novel.128	5.83	8.61	7.62	16.25	14.23	17.22	1.56832	1.68546e-09	2.70828e-08
GeneID:107805903	0.51	0.65	0.5	2.3	1.99	1.74	1.62793	6.12832e-13	1.38675e-11
GeneID:107822122	12.57	10.25	13.41	21.81	37.7	27.01	1.64828	9.49324e-18	3.22444e-16
GeneID:107778759	48.42	41.46	60.26	156.85	137.66	132.46	1.93589	5.33128e-54	9.92266e-52
novel.24694	0.78	1.2	1.64	2.77	3.7	3.87	1.8893	5.1291e-09	7.73182e-08
novel.13812	0	0	1.3	4.82	3.22	3.5	3.67835	0.00784644	0.0380728
GeneID:107805471	37.16	37.62	31.93	55.37	57.51	60	1.05868	1.13288e-23	5.50494e-22
GeneID:107791436	1.79	1.1	1.78	2.99	2.25	3.54	1.31137	0.00118258	0.00729462
novel.17403	0	0.52	0	3.58	5.26	1.4	4.90703	0.000773527	0.00501104
GeneID:107771371	0.48	0.32	0.6	1.47	2.57	2.31	2.53421	4.68802e-15	1.26856e-13
novel.3026	2.86	2.12	2.24	3.76	7.37	8.18	1.83618	1.42567e-06	1.54345e-05
GeneID:107762804	0.73	0.78	0.78	1.81	1.74	1.38	1.48505	3.98068e-07	4.68677e-06
novel.1362	0	0	0	9.71	36.14	13.25	5.14072	0.00189338	0.011084
GeneID:107804889	14.04	11.44	11.89	59.75	61.78	60.73	2.70111	1.635e-126	1.71808e-123
novel.1127	6.7	0	4.38	41.6	102.59	70.34	5.03447	3.16193e-05	0.0002745
GeneID:107811096	2.38	2.4	2.6	6.42	6.82	4.96	1.66798	6.17012e-22	2.68288e-20
novel.23817	0.2	0.42	0.24	1.46	0.71	0.66	2.14112	0.00255614	0.0144585
novel.444	2.2	2.61	3.18	3.9	5.5	4.13	1.1441	2.24797e-05	0.000200328
novel.25432	0.35	0.56	0.95	1.19	4.51	4.2	2.84756	7.55455e-05	0.000611955
novel.11360	6.45	4.55	5.95	8.97	10.53	10.78	1.28969	2.3205e-05	0.000206389
novel.26729	0.64	0.81	0.72	1.69	1.41	1.26	1.37893	4.05319e-05	0.000345277
novel.18008	0.94	0.38	1.04	1.33	0.78	1.69	1.07905	0.00922385	0.0436806
GeneID:107763879	1.39	1.19	1.68	3.31	3.41	4.2	1.76374	6.64361e-06	6.47655e-05
novel.3736	0.34	0	0	0.75	3.13	0.51	4.17702	0.0104364	0.0484182
GeneID:107775346	8.23	9.15	10.52	16.23	16.76	16.3	1.19224	9.08232e-23	4.17216e-21
GeneID:107827401	1.02	1.52	1.68	2.35	2.58	2.73	1.22909	6.44727e-08	8.48184e-07
novel.18201	0.77	0.89	1.24	2.45	1.49	1.62	1.31893	3.28703e-05	0.000284528
novel.22182	0.61	0.66	0.63	1.27	1.8	1.38	1.62669	0.00461283	0.0240855
novel.14871	0.46	2.08	0.93	15.45	15.35	17.89	4.25529	1.66169e-34	1.50204e-32
novel.4296	1.55	1.67	3.16	5.54	9.99	3.73	1.76848	8.61273e-06	8.23541e-05
novel.12975	2.24	2.57	2.63	10.98	14.05	16.62	2.8851	1.17004e-30	8.69154e-29
GeneID:107795802	17.3	18.06	18.58	39.45	33.26	35.07	1.37233	4.93539e-33	4.17678e-31
novel.15196	0.08	0.29	0.43	0.96	0.79	0.86	2.09466	0.000268579	0.0019422
GeneID:107817085	0.37	0.15	0.37	1.41	0.93	0.49	2.05222	0.00018598	0.00139034
GeneID:107822778	25.08	25.01	25.93	53.8	51.74	48.39	1.39373	1.71031e-40	1.9606e-38
GeneID:107821242	8.72	9.39	10.28	28.56	37.52	43.89	1.84606	1.63706e-54	3.06958e-52
novel.7769	2.44	2.36	3.3	5.05	6.33	5.71	1.44533	4.17574e-16	1.24701e-14
novel.5481	0.06	0.06	0.35	0.6	1.17	0.47	2.60973	0.00156077	0.00933077
GeneID:107813837	0.79	0.26	0.31	1.51	1.57	1.67	2.27709	9.74861e-05	0.000771189
GeneID:107818517	0.18	0.41	0.21	0.99	0.7	0.8	2.03358	5.17861e-05	0.000432672
GeneID:107812115	4.99	5.64	5.58	10.26	9.64	12.41	1.10144	5.76225e-10	9.80906e-09
GeneID:107800665	6.44	6.08	4.87	15.22	11.73	11.4	1.41177	4.70343e-17	1.51391e-15
novel.14497	0	0	0	7.76	3.74	3.44	5.34798	0.000577914	0.00386276
GeneID:107772300	4.81	2.97	3.78	10.3	7.61	7.77	1.73207	0.00113675	0.00703691
novel.24889	0	0	0.87	3.65	4.75	6.54	4.52708	0.00255597	0.0144585
novel.15624	0.8	0	0.18	4.76	5.34	4.86	4.40069	2.95026e-08	4.06136e-07
novel.9936	1.79	3.98	0	10.66	11.07	11.1	3.48203	0.000698014	0.00457236
novel.17283	0	0.71	0	3.45	3.87	1.86	4.3211	0.00501859	0.0259145
novel.24077	2.18	1.55	3.08	4.04	5.05	6.73	1.58648	7.97037e-10	1.33251e-08
GeneID:107824956	4.98	3.9	5.84	8.11	7.28	8.12	1.06242	1.72977e-07	2.14421e-06
novel.23929	0.75	0	0.64	6.8	4.96	3.92	4.1194	0.00130385	0.00796187
GeneID:107787634	0.3	0.27	0.24	1.84	4.54	3.45	3.99341	2.49505e-24	1.25722e-22
GeneID:107826380	0.7	0.17	1.97	14.36	15.45	14.9	4.49671	3.61488e-10	6.26567e-09
GeneID:107819784	2.81	2.86	1.94	4.56	3.85	4.48	1.52855	5.94436e-16	1.75852e-14
novel.9664	0	0.53	0.9	1.84	2.69	3.95	3.13629	0.0098454	0.046126
GeneID:107761903	0	0.23	0.19	1.29	0.17	1.14	3.0602	0.00664939	0.0330269
novel.13923	1.06	0.28	0.24	3.89	6.22	5.64	3.84099	7.64252e-07	8.63532e-06
GeneID:107815070	1.59	1.49	1.81	2.32	2.78	2.86	1.07358	4.7022e-05	0.00039595
novel.3247	1.8	2.45	1.85	4.17	2.83	2.92	1.11428	0.00232744	0.0133145
novel.16120	0	0	0.83	2.07	5.65	3.11	4.17616	0.00856793	0.0410836
GeneID:107767883	3.46	3.41	3.26	5.4	6.09	5.98	1.15164	5.60418e-13	1.27157e-11
GeneID:107821640	1.88	2.67	2.58	4.25	3.65	4.36	1.16397	4.54701e-07	5.32109e-06
GeneID:107782173	14.21	12.83	14.71	27.79	25.16	21.31	1.1397	3.63166e-15	9.94988e-14
GeneID:107788775	8.88	9.76	9.74	28.59	26.57	26.78	1.907	2.08427e-57	4.12268e-55
novel.18505	3.24	4.86	8.57	45.31	43.61	35.3	3.4242	9.64496e-28	6.02828e-26
GeneID:107805027	2.22	1.74	2	3.13	3.87	4.31	1.28662	3.90306e-09	5.98014e-08
novel.23818	0.19	0.2	0.17	2.37	1.3	1.33	3.6453	0.000999714	0.00629206
GeneID:107800383	89.56	103.37	102.54	242.02	287.27	307.23	1.89545	1.72611e-76	5.80423e-74
GeneID:107793754	0.77	0.97	0.58	1.49	2.31	3.95	1.50913	0.00239594	0.0136568
GeneID:107824050	3.05	4.1	3.95	7.74	6.69	6.51	1.31082	1.20645e-08	1.74311e-07
novel.7434	0	0.21	0.18	1.1	0.71	1.12	3.35853	0.000884672	0.0056405
GeneID:107804931	19.6	18.82	20.1	41.41	44.95	44.6	1.53671	3.66387e-52	6.35058e-50
novel.7389	0.31	0.17	0.21	2.09	2.91	1.95	3.72172	6.43495e-09	9.5999e-08
novel.12916	26.93	34.61	53.48	57.84	51.87	53.42	1.12547	1.25199e-05	0.000116705
GeneID:107792996	0.37	0.38	0.65	0.89	0.9	1.31	1.50778	6.82535e-05	0.000556881
novel.15708	0.35	0.62	0.42	1.5	1.97	2.85	2.60667	8.09509e-05	0.000651937
novel.84	0	3.01	0	6.71	27.29	10.18	4.76387	0.00159223	0.00949972
GeneID:107812660	0.13	0.32	0.05	1.6	1.17	1.14	3.386	2.17115e-11	4.27276e-10
novel.3472	0.43	0.23	0.1	2.97	1.14	1.34	3.27468	4.76587e-05	0.000401125
GeneID:107831431	2.92	3.16	2.81	7.4	7.51	7.06	1.68594	6.73913e-20	2.61674e-18
novel.2101	0.14	0.58	0.37	6.31	9.59	10.64	5.04723	3.97116e-17	1.28398e-15
novel.17678	1.62	0.62	1.44	3.38	3.36	3.38	1.95981	0.00421429	0.0222511
GeneID:107762874	0	0	0	0.25	0.09	0.03	4.64762	0.0102564	0.0477366
novel.19756	0.1	0.11	0.24	1.48	1.36	2.2	3.83613	1.98648e-09	3.16475e-08
GeneID:107830798	941.07	958.49	1025.55	2111.51	2127.68	1797.33	1.3008	2.064e-46	2.94919e-44
novel.10537	4.17	4.63	3.34	5.77	7.16	8.47	1.25625	4.07293e-05	0.000346784
GeneID:107794627	2.43	2.61	2.13	5.65	4.83	5.03	1.47432	2.12344e-15	5.95686e-14
GeneID:107785164	0.28	0.3	0.34	2.21	2.3	0.46	2.85238	0.000165903	0.00125551
novel.8871	0.27	0	0	0.79	2.56	0.61	4.32743	0.00601318	0.0303208
novel.19014	6.38	3.88	8.97	74.41	73.74	85.83	2.42073	6.04952e-28	3.84297e-26
GeneID:107773884	7.11	7.02	8.07	16.12	15.27	15.91	1.4588	1.231e-39	1.38286e-37
novel.25730	0	0	0	14.98	8.85	13.27	6.6601	6.60029e-07	7.5456e-06
GeneID:107790226	1.76	0.88	1.68	2.35	4.03	3.82	1.64174	0.000184851	0.00138354
novel.20767	289.75	261.21	285.8	607.97	507.24	448.18	1.30085	3.06417e-27	1.85761e-25
GeneID:107818098	24.49	22.2	25.72	53.78	52.41	53.86	1.29918	2.57418e-22	1.14396e-20
novel.19199	0.82	0.95	0.74	1.92	1.75	1.59	1.47434	0.00132073	0.00805126
GeneID:107804673	0.42	0.44	0.7	0.86	1.49	1.22	1.55363	0.00442607	0.0232137
GeneID:107759280	6.16	6.34	7.48	23.5	25.9	26.34	1.7144	2.88707e-40	3.29459e-38
novel.23739	1.58	1.39	1.93	9.47	9.84	8.19	2.94227	1.91606e-21	8.09416e-20
novel.21563	0	0	0	1.46	0.85	4.15	4.77205	0.00619888	0.0311048
novel.5151	0.91	0.98	1.12	1.79	1.5	1.73	1.12283	0.00234293	0.0133983
GeneID:107803884	0.43	0.44	0.39	1.05	0.72	0.47	1.20876	0.00506696	0.0261295
novel.26062	1.04	1.04	1.95	2.6	3.93	3.48	1.69551	5.62408e-06	5.55133e-05
novel.27378	0.69	1.01	0.54	1.17	1.2	1.41	1.15021	0.0108268	0.0499766
novel.8438	0.73	0.64	0.67	1.74	2	2.07	1.89587	3.89e-05	0.000332386
novel.9759	0.35	0.35	0.46	0.74	0.55	0.75	1.1873	0.00116378	0.00718918
GeneID:107799566	2.35	3.16	3.37	6.15	6.67	6.1	1.47103	1.91611e-13	4.56526e-12
GeneID:107785381	6.36	7.11	8.89	16.38	14.64	16.24	1.53323	1.89619e-09	3.03144e-08
GeneID:107815011	0.08	0.04	0.23	0.48	0.39	0.81	2.593	0.00110037	0.00683464
GeneID:107773007	149.24	159.59	167.41	346.47	282.53	230.75	1.27356	4.19073e-21	1.74403e-19
GeneID:107784529	0.07	0	0	0.2	0.25	0.4	3.90561	0.00320125	0.017549
GeneID:107798122	1.98	1.35	0.9	4.74	3.92	4.55	2.05233	1.08139e-07	1.37808e-06
novel.4046	0.19	0.2	0.67	1.11	2.87	2.8	3.1154	0.000445615	0.00305427
GeneID:107783311	2.4	2.53	2.37	2.12	5.29	3.93	1.00532	0.00114759	0.00709787
novel.16484	0.83	0	0	3.46	6.36	4.27	4.7588	0.00114188	0.00706779
GeneID:107811588	2.36	2.29	2.54	4.46	4.77	3.61	1.19139	9.72815e-09	1.42102e-07
GeneID:107827095	5.6	5.95	4.82	11.59	9.16	7.43	1.1706	1.16723e-08	1.68984e-07
novel.15895	0.27	0.09	0.48	2.22	3.56	2.78	3.71745	2.13525e-09	3.39212e-08
novel.7228	10.87	10.84	11.57	20.85	21.5	20.26	1.27242	1.49456e-32	1.21981e-30
GeneID:107811918	1.38	1.86	2.1	3.88	3.67	4.18	1.51075	7.39767e-13	1.66131e-11
GeneID:107807428	281.49	263.48	290.17	637.63	559.25	551.08	1.44263	2.30775e-47	3.3936e-45
novel.16365	1.36	1.71	2.37	2.9	5.62	4.15	1.30946	3.6736e-05	0.000315177
novel.10272	0.76	0.58	0.67	0.6	1.63	1.32	1.20531	0.00363018	0.019558
novel.17655	0	0	0	2.28	1.67	0.85	6.08478	2.04943e-05	0.000183837
GeneID:107821627	2.8	2.67	3.67	6.6	7.02	5.38	1.45515	1.14677e-07	1.45587e-06
novel.23931	5.1	4.58	5.98	45.44	49.9	46.69	3.55877	4.83395e-158	8.40758e-155
GeneID:107816711	15.77	14.67	17.3	26.84	30.06	27.69	1.22116	6.38515e-19	2.33377e-17
GeneID:107826167	3.94	8.07	7.41	20.07	20.52	19.13	1.61898	2.07444e-10	3.67907e-09
novel.15172	0	2.45	0	12.5	12.51	4.2	4.32131	0.00538313	0.0275598
GeneID:107798995	11.62	10.79	16.61	29.26	36.98	31.76	1.71364	4.78831e-30	3.4651e-28
GeneID:107791789	0.65	0.58	0.56	1	1.34	0.89	1.23416	0.000293453	0.00210397
GeneID:107816617	0.73	0.51	0.89	2.3	2.75	2.64	2.22514	2.19736e-10	3.88887e-09
GeneID:107781634	0.06	0.16	0.03	0.49	0.25	0.5	2.76993	0.000547051	0.00367658
novel.5907	0.88	0.6	0.44	1.35	2.12	1.87	1.87046	0.000515496	0.00348541
GeneID:107827507	2.13	3.46	3.48	5.2	5.3	7.55	1.358	6.18981e-07	7.10047e-06
GeneID:107821797	2.34	2.52	2.1	3.55	3.96	3.85	1.1075	6.13041e-05	0.000505
GeneID:107804732	2.56	2.42	2.9	4.36	4.34	5.37	1.15909	2.2303e-07	2.7166e-06
GeneID:107784279	73.32	81.04	84.11	187.65	240.74	251.65	1.70602	2.37747e-60	5.08124e-58
novel.15785	0	7.51	16.66	120.08	52.55	56.51	3.70325	1.7481e-07	2.16374e-06
GeneID:107781600	1.4	1.49	1.62	3.89	3.73	3.07	1.61595	1.08551e-15	3.13227e-14
GeneID:107781985	0.89	1	1.39	2.91	2.58	2.85	1.72056	3.27344e-09	5.06469e-08
GeneID:107827042	0.44	0.54	1.14	2.11	2.93	2.31	2.17857	8.42185e-07	9.46923e-06
GeneID:107819722	0.35	0.28	0.17	0.94	0.59	0.7	1.82628	5.85303e-07	6.73867e-06
GeneID:107776767	220.05	214.53	251.51	1275.52	1117.03	981.89	2.53481	1.60967e-114	1.19397e-111
GeneID:107802168	3.81	4.07	3.99	11.76	12.39	11.51	1.96772	6.62737e-37	6.64569e-35
GeneID:107826009	2.14	2.14	2.17	4.07	5.94	4.54	1.49671	1.66676e-10	2.98226e-09
novel.2618	0	0	0	2.74	6.43	3.17	4.96741	0.0028695	0.0159946
GeneID:107822413	1.86	2.94	2.24	4.82	4.41	4.28	1.35914	6.62827e-07	7.57416e-06
novel.5773	12.72	20.57	11.92	46.87	44.58	22.75	1.45793	5.02356e-31	3.78749e-29
GeneID:107791298	41.09	38.7	47.77	124.73	117.31	107.91	1.73585	1.20461e-52	2.12446e-50
novel.13035	0.2	0.32	0.09	1.2	1.92	0.81	3.14659	0.000245689	0.00179235
GeneID:107765235	0.32	0.58	0.37	0.92	0.88	0.79	1.39694	0.00099536	0.00626857
GeneID:107808980	1.42	2.81	2.01	14.2	11.82	9.47	2.35124	9.3936e-14	2.30449e-12
novel.2150	1.11	0.57	0	1.82	2.18	9.24	3.58943	0.00257844	0.0145637
novel.26685	0.67	0.48	0.71	1.37	1.08	1.32	1.40383	0.00409268	0.0217204
GeneID:107801245	2.27	1.96	2.19	10.24	13.18	11.18	2.82282	2.87759e-30	2.10657e-28
novel.1781	0	0	0.89	2.19	2.67	4.64	3.91243	0.00379853	0.0203585
novel.14342	1.4	1.32	1.04	3.94	4.06	3.61	2.03569	5.70346e-08	7.55058e-07
GeneID:107763489	0.13	0.13	0.25	0.95	0.91	1.18	2.82064	8.14664e-07	9.17207e-06
novel.23816	0.68	0.35	1.21	3.96	1.44	2.76	2.36853	0.00984329	0.0461233
GeneID:107821273	2.97	3.23	2.72	5.67	6.99	8.74	1.6893	2.99812e-08	4.12162e-07
GeneID:107779698	13.09	14.02	16.84	24.64	39.8	47.81	1.68795	1.11359e-21	4.77622e-20
novel.16103	0.57	0.61	1.55	1.94	1.59	1.59	1.29872	0.00619104	0.0310747
novel.11598	6.33	12.42	11.57	22.31	32.14	25.17	2.16197	0.000639835	0.00423248
GeneID:107812239	1.46	1.41	1.68	4.04	2.86	3.61	1.58248	1.15751e-11	2.34472e-10
GeneID:107776131	1.08	0.62	0.79	1.43	1.44	2.17	1.40747	0.00413064	0.0218712
GeneID:107764795	11.46	12.34	14.8	47.63	43.92	37.04	1.34393	1.83551e-22	8.2588e-21
GeneID:107768738	3.93	5.72	4.19	13.03	12.41	10.65	1.82628	1.36333e-10	2.46647e-09
novel.17841	3.55	0.72	4.86	62.39	50.29	55.02	4.79718	2.73594e-25	1.48226e-23
GeneID:107827043	0.68	0.22	0.83	0.98	0.85	0.99	1.09933	0.0020664	0.0119813
GeneID:107772054	4.89	3.16	5.62	6.61	5.91	7.32	1.06011	6.82108e-09	1.014e-07
novel.19820	0.26	0.82	0.23	3.47	3.08	1.4	3.11779	0.00096093	0.00607601
novel.5923	46.12	39.54	43.67	94.86	131.71	154.7	1.93947	7.59151e-45	1.0321e-42
GeneID:107824880	19.37	21.12	24.64	46.87	42.31	42.58	1.4305	2.66659e-24	1.34098e-22
GeneID:107805235	2.73	2.37	3.06	4.42	4.79	4.03	1.07436	1.50264e-07	1.87882e-06
GeneID:107824542	0.63	0.53	0.7	2.05	1.82	2.03	2.05718	3.88076e-09	5.94959e-08
novel.13777	5.53	6.73	4.29	5.96	3.47	3.07	1.1457	0.000280482	0.00201959
novel.23797	27.31	23.56	37.01	74.45	63.86	68.46	1.61849	1.35256e-31	1.05281e-29
GeneID:107807337	0.15	0.47	1	1.07	1.77	2.34	2.05543	0.000512225	0.00346654
GeneID:107792438	0.57	0.87	0.89	1.82	2.07	2.35	1.87199	2.64258e-11	5.14093e-10
novel.6447	0.78	0.73	0.81	2.05	1.75	1.76	1.63171	7.10829e-12	1.46162e-10
novel.6158	0.12	0	0.33	2.9	2.68	3.42	4.65253	7.74154e-08	1.00846e-06
GeneID:107814848	4343.33	4784.7	5104.12	10246.1	10221	10618.2	1.50305	2.9307e-75	9.53688e-73
novel.14153	0.59	1.24	1.06	6.52	5.35	12.05	3.55684	3.24276e-08	4.43617e-07
novel.18630	1.68	2.19	2.37	5.2	4.63	2.73	1.46287	7.82478e-06	7.54058e-05
novel.1518	0.9	1.07	0.79	1.68	2.93	3.4	1.74392	2.90597e-08	4.00476e-07
GeneID:107760139	22.84	24.78	16.74	31	26.23	39.63	1.18356	8.64122e-08	1.11786e-06
GeneID:107828852	8.75	8.59	8.43	28.69	32.15	34.51	2.3895	2.12102e-101	1.22968e-98
GeneID:107803671	5.76	3.92	5.31	22.78	22.1	24.21	2.62715	4.20268e-33	3.57469e-31
novel.17257	2.22	1.38	2.34	5.35	4.35	4.25	1.60824	3.88009e-11	7.41037e-10
novel.1006	0.88	0.75	1.43	4.09	3.03	2.77	2.09455	1.63185e-06	1.75275e-05
novel.19749	0.31	0.5	0.71	4.61	3.79	3.15	3.33333	2.44631e-07	2.95827e-06
GeneID:107760747	0.79	0.46	0.44	1.21	0.96	1.43	1.48245	0.00574535	0.0291597
GeneID:107825177	0.13	0.14	0.12	1.02	1.38	0.96	3.54459	7.92426e-06	7.62916e-05
novel.18279	0.64	0.34	0.22	1.34	2.11	1.53	2.45529	6.45928e-05	0.000529755
GeneID:107764647	0.51	0.55	0.62	0.98	1.55	2.98	2.09969	0.000419786	0.00289398
GeneID:107784351	1.53	2.42	1.54	3.41	3.95	3.75	1.4861	0.00405455	0.0215403
GeneID:107796929	0.8	0.63	1.22	3.32	4.24	4.13	2.55675	3.81418e-10	6.59073e-09
novel.9605	0.6	0.8	0.68	2.04	1.78	1.57	1.8193	0.00831235	0.0399949
GeneID:107764235	0.14	0.3	0.11	0.71	0.38	0.77	2.33389	0.000636304	0.00421077
novel.16421	0	0	0	18.84	6.51	11.42	6.00053	2.78547e-05	0.000244425
GeneID:107761067	21.5	22.1	23.31	170.19	158.6	140.54	2.02736	3.06312e-74	9.36368e-72
GeneID:107808429	3.56	3.55	3.74	5.8	7.21	6.45	1.24214	1.66933e-06	1.79072e-05
GeneID:107823087	1.63	1.08	2.84	4.53	5.84	5.39	1.87607	2.15026e-09	3.41135e-08
novel.5686	0	0	0.59	1.45	3.79	2.28	4.09321	0.0106163	0.0490991
GeneID:107824358	9.19	9.69	11.22	11.25	12.65	12.06	1.74917	3.25233e-30	2.37401e-28
novel.14404	0.84	0.3	1.01	8.64	13.2	12.75	4.41778	5.10739e-22	2.23259e-20
GeneID:107802207	2.44	2.65	3.04	4.2	5.58	6.46	1.3723	1.57029e-08	2.23677e-07
GeneID:107778339	10.64	10.79	10.32	16.92	17.04	15.92	1.0196	3.13677e-19	1.17895e-17
novel.26491	0	0	0	2.45	2.5	1.01	9.07107	1.84223e-13	4.39546e-12
novel.1602	14.14	11.2	12.64	20.03	19.44	14.05	1.14832	7.76984e-12	1.5944e-10
GeneID:107829152	8.54	8.58	7.86	15.67	15.96	18.65	1.39771	8.98346e-18	3.05953e-16
novel.14051	23.54	14.74	45.09	117.98	154.7	176.74	3.02738	9.34439e-07	1.04529e-05
GeneID:107774242	0	0.24	0	1.68	1.26	1.9	4.75255	0.00107613	0.00670527
GeneID:107762746	3.96	3.41	3.45	8.6	9.38	3.31	1.41528	0.000174456	0.00131433
novel.25766	0.56	0.77	1.27	2.09	1.21	1.27	1.20684	0.000781647	0.00505909
novel.21298	19.98	17.33	23.43	56.31	66.63	62.23	2.30065	4.6334e-15	1.25445e-13
novel.14260	8.26	9.4	9.13	30.32	32.28	21.81	2.06507	4.3311e-28	2.78288e-26
GeneID:107823119	0.15	0.32	0.13	1.35	1.14	1.3	2.9996	0.00396225	0.0211059
GeneID:107765981	0.48	0.42	0.83	1.18	1.54	0.78	1.39684	6.71717e-06	6.54553e-05
GeneID:107785058	3.09	3.8	2.82	5.28	5.56	5.45	1.07816	1.09461e-09	1.80075e-08
novel.25723	2.02	2.21	2.68	2.95	4.58	4.54	1.17449	2.19241e-06	2.30814e-05
GeneID:107772042	208.16	224.43	224.6	371.03	369.8	399.35	1.18341	1.52963e-44	2.05741e-42
novel.25202	2.07	1.97	2.69	5.78	4.29	5.48	1.59285	2.39396e-10	4.21757e-09
novel.27044	5.52	4.78	6.37	15.1	15.38	7.35	1.56617	4.23689e-12	8.89324e-11
novel.13763	0.73	0	0	6.13	3.54	2.88	4.69501	0.0013957	0.00845923
novel.10290	4.77	5.22	7.14	18.67	8.61	8	1.6073	0.00101959	0.00639451
novel.10140	35.26	35.79	28.32	43	64.64	60.42	1.15991	3.04051e-13	7.1e-12
novel.7517	2.21	3.33	5.34	10.54	15.79	18.82	2.44854	1.17098e-19	4.46772e-18
novel.15694	2.4	2.85	3.06	9.27	12.18	14.06	2.47048	9.88134e-36	9.38616e-34
GeneID:107789912	5.11	4.65	5.65	16.4	17.06	18.04	1.68269	9.19414e-19	3.32194e-17
GeneID:107787289	238.97	247.8	280.68	601.96	512.79	498.8	1.45891	8.97948e-43	1.13229e-40
novel.16423	0	1.59	1.35	4.78	5.8	9.65	3.33931	7.99635e-05	0.000645015
GeneID:107794783	3.47	5.13	5.86	67.97	48.56	47.81	1.98971	3.60476e-36	3.48315e-34
GeneID:107765037	5.02	5.27	6.13	14.31	15.58	13.95	1.68436	4.65075e-28	2.98067e-26
novel.2109	0.12	0.13	0.22	1.91	2.51	0.1	3.70453	0.000618569	0.00410634
novel.19303	2.58	5.42	1.94	19.9	29.58	27.72	2.74955	9.81338e-09	1.43264e-07
GeneID:107758966	2.14	1.99	3.35	3.39	4.28	4.86	1.21986	1.04262e-05	9.84812e-05
novel.9196	2.19	1.57	3.14	3.73	3.24	5.38	1.22082	3.25176e-05	0.000281766
novel.9583	0.76	1.04	0.76	1.43	1.62	1.51	1.22907	0.0102337	0.0476486
novel.348	0.38	0.4	0	1.65	2.89	1.38	3.54303	0.00962526	0.0452501
GeneID:107765648	5.67	4.66	6.37	22.33	21.02	21.55	2.34336	1.59386e-48	2.4142e-46
GeneID:107820408	5.7	5.69	5.39	18.58	31.84	28.17	2.59342	1.77705e-46	2.55364e-44
GeneID:107783688	0.39	0.56	0.83	1.21	1.55	1.1	1.48296	1.21804e-07	1.54132e-06
novel.19277	4.96	6.95	6.71	44.61	46.99	51.85	3.23116	4.08146e-64	9.75662e-62
GeneID:107779276	2.05	1.48	1.84	4.04	3.84	3.59	1.46378	1.18652e-18	4.25654e-17
GeneID:107794812	5.12	4.62	5.12	7.6	8.43	8.23	1.10355	5.6483e-07	6.51932e-06
novel.17664	0.51	0.55	0.74	1.71	1.75	0.84	1.67519	0.00995535	0.0465633
novel.6281	0.11	0.37	0.41	1.31	1	1.53	2.49326	2.92548e-05	0.000255823
novel.18405	0.25	0	0	1.64	0.55	1.51	4.31625	0.00540615	0.0276581
GeneID:107800514	17.53	18.88	15.78	30.1	30.13	28.84	1.16659	8.7136e-17	2.75725e-15
GeneID:107764027	4.93	5.11	5.21	8.68	8.24	7.99	1.09383	2.72991e-15	7.56145e-14
GeneID:107817068	30.09	30.09	29.33	101.49	85.59	95.16	2.04511	5.44985e-72	1.57077e-69
GeneID:107792239	0.48	0.42	0.42	0.85	0.92	0.89	1.3793	4.48852e-05	0.000379414
GeneID:107800638	1.39	1.32	1.69	2.84	2.65	2.88	1.31645	1.0555e-10	1.92963e-09
novel.24883	0.02	0.02	0.01	0.17	0.11	15.75	9.8636	0.000158191	0.00120202
novel.7103	1	1.54	1.56	3.45	4.16	4.66	1.97655	1.08158e-08	1.57125e-07
novel.24755	0	2.99	2.43	54.85	53.87	33.11	5.39735	4.70003e-11	8.92227e-10
novel.3541	0	0	0	7.12	3.12	6.94	5.20723	0.00102813	0.00644119
novel.13564	0.25	0.12	0.59	1.9	0.88	0.97	2.36327	9.79147e-06	9.29553e-05
novel.1827	0	0	0	4.91	2.61	2.2	6.12465	1.54331e-05	0.000141538
novel.15873	1.28	3.1	5.08	30.89	27.67	20.43	3.62704	3.26868e-17	1.0678e-15
GeneID:107778729	0.59	1.07	0.87	1.92	1.78	0.87	1.24884	0.00203023	0.0118084
GeneID:107798209	3.91	3.77	4.3	6.59	6.76	6.36	1.08148	2.08498e-17	6.93237e-16
GeneID:107824102	0.53	0.69	0.63	1.83	3.64	3.84	2.71094	3.61183e-11	6.92688e-10
GeneID:107774032	2.07	2.2	1.93	10.41	17.24	13.52	3.0611	5.54648e-34	4.91668e-32
novel.14044	3.48	3.89	4.6	12.87	13.63	14.25	2.14833	1.40431e-36	1.38886e-34
GeneID:107795912	20.9	20.94	21.59	65.07	63.56	59.06	1.94584	2.16259e-73	6.49279e-71
GeneID:107785263	0.3	0.39	0.39	0.78	0.39	1.03	1.42138	0.00684338	0.0338903
novel.11421	79.73	75.37	108.66	782.71	876.89	795.82	3.66797	2.17435e-216	1.09672e-212
GeneID:107811621	12.04	11.13	15.01	18.21	19.69	21.66	1.02656	5.23433e-13	1.19356e-11
novel.3813	0.98	2.36	1.22	3.43	2.36	4.49	1.60571	0.000892286	0.00568402
novel.19323	0	0	0	4.07	5.19	4.74	6.00794	2.42532e-05	0.000214954
novel.12116	1.36	1.46	1.94	5.1	3.89	2.65	1.7098	2.97954e-05	0.000260054
novel.5042	0.44	0.47	0.57	1.83	1.53	1.37	2.06642	5.59052e-05	0.000464012
GeneID:107790133	5.86	5.4	4.64	12.52	11.35	10.41	1.49178	1.54508e-16	4.78111e-15
novel.23095	0	0	0	1.72	0.68	0.42	5.34235	0.000764589	0.00496333
GeneID:107811771	0	0.45	0.34	1.22	0.56	1.21	2.41141	0.000614808	0.00408396
novel.2325	0	0	0.91	6.88	2.46	3.4	4.16277	0.00829219	0.039936
GeneID:107808573	1.57	1.17	1.75	3.23	4.56	5.29	1.91482	2.44432e-16	7.44499e-15
GeneID:107772520	0.6	0.28	0.87	2.53	1.73	2.61	2.28449	2.00456e-05	0.0001801
novel.21846	0.76	0.68	0.97	2.54	1.13	1.8	1.6039	0.000544441	0.00366148
GeneID:107766478	1.61	1.84	1.97	4.77	3.3	3.61	1.37251	9.3206e-07	1.04286e-05
GeneID:107814549	1.85	2.39	2.99	3.94	3.55	4.37	1.08582	9.03618e-08	1.16537e-06
GeneID:107780626	1.46	1.49	1.92	2.23	4.49	2.93	1.37439	0.000264905	0.00191755
novel.21845	0	0.26	0.45	2.06	1.82	1.7	3.56432	1.0858e-05	0.00010231
novel.4186	2.46	1.66	3.3	5.78	3.82	7.93	1.53178	0.00103489	0.00647779
novel.24574	0	0	0	5.39	4.23	3.12	4.95975	0.00256507	0.0144995
GeneID:107800312	13.59	12.35	16.87	40.3	42.32	44.05	1.98956	1.05517e-35	1.0004e-33
GeneID:107803364	11.19	11.14	12.81	22.45	18.95	22.34	1.18194	1.77279e-12	3.85422e-11
novel.12284	14.26	13.39	20.64	43.85	50.17	48.23	1.95626	1.35056e-40	1.55883e-38
GeneID:107764349	0.7	0.62	0.61	0.96	1.81	1.49	1.52	0.00103961	0.00650422
GeneID:107818464	0.4	0.38	0.4	1.25	0.89	0.89	1.76033	0.000611995	0.00406866
GeneID:107764035	2.8	2.14	3.79	5.91	10.93	14.41	2.21768	9.55924e-15	2.52704e-13
GeneID:107832186	0.15	0.27	0.21	0.46	0.4	0.47	1.44293	0.00511778	0.0263511
GeneID:107806524	5.75	6.85	5.42	10.58	9.63	9.82	1.1122	2.38418e-12	5.11509e-11
GeneID:107805416	4.26	4.1	6.86	9.81	13.42	12.26	1.5573	4.77007e-19	1.76133e-17
novel.25655	3.17	2.61	4.18	5.28	6.92	7.1	1.29708	9.43161e-15	2.49591e-13
novel.7899	0	0	0	3.94	6.22	2.61	5.60769	0.000203195	0.00150831
novel.21056	0.62	0.79	0.92	2.54	2.35	3.83	2.31097	3.82625e-09	5.87138e-08
novel.27325	0.52	0.77	0.61	1.53	1.24	1.21	1.46437	0.00108067	0.00673019
GeneID:107778874	1396.82	1414.81	1368.85	2801.6	2291.06	2152.01	1.17214	6.16304e-24	3.05361e-22
GeneID:107804024	8.98	8.24	10.48	15.12	15.93	18.48	1.18953	3.18949e-17	1.04396e-15
GeneID:107771390	0.06	0.11	0.19	0.39	0.51	0.48	2.35707	0.000687802	0.00451308
GeneID:107792885	0.02	0.03	0.17	0.24	0.26	0.42	2.40244	0.0029317	0.0162894
novel.5881	1.05	0.96	0.54	6.01	7.21	6.87	3.38149	1.23745e-21	5.29396e-20
GeneID:107779393	0.44	0.49	0.53	0.93	1.38	1.16	1.60672	3.28403e-07	3.91036e-06
novel.8616	0	0	0	2.1	4.51	6.07	5.96781	3.90651e-05	0.000333741
novel.27694	0.23	0	0	0.68	0.35	2.86	4.46336	0.0047315	0.0246287
GeneID:107764393	5.89	5.89	8.54	18.63	19.07	19.91	1.90243	4.95947e-25	2.62212e-23
GeneID:107778071	1.56	1.24	1.4	3.36	3.99	4.18	1.83365	1.66685e-17	5.58262e-16
novel.18025	0.8	0.86	0.84	1.39	1.27	1.68	1.18153	0.00269569	0.0151354
GeneID:107775673	0.28	0.38	0.41	0.7	0.8	0.84	1.49546	0.000453096	0.00310175
novel.23335	3.64	3.73	2.91	5.77	6.04	3.75	1.02413	0.00179045	0.0105525
novel.14309	1.94	1.7	3.12	42.7	74.01	88.52	5.34016	2.27677e-41	2.73424e-39
GeneID:107827622	166.97	167.19	168.63	317.24	273.21	274.34	1.15093	1.33876e-29	9.33964e-28
GeneID:107782197	8.91	9.63	11.1	16	16.3	17.31	1.22342	1.17824e-23	5.71985e-22
novel.24323	0.09	0.08	0.07	0.6	0.19	0.33	2.66999	1.29449e-06	1.41235e-05
novel.22729	6.04	6.72	8.93	22.85	20.41	15.34	1.84522	2.1746e-18	7.64353e-17
novel.665	1.73	0.02	3.74	2.69	4.4	5.95	1.7403	0.00772106	0.0375547
GeneID:107762988	39.85	37.21	40.85	71.99	65.67	70.1	1.08812	5.22443e-28	3.33563e-26
novel.8056	0.17	0.18	0.3	5.7	4.08	6.2	5.00212	7.11342e-17	2.26511e-15
novel.17656	0.47	0	0.41	3.35	3.25	3.3	4.02916	0.00178743	0.0105399
novel.22544	0	0	0	5.49	1.43	3.96	4.65607	0.00793176	0.0384313
GeneID:107780981	5.45	5.72	5.55	23.25	22.92	17.11	1.73748	8.9038e-29	5.94833e-27
novel.12087	0	0	0	3.12	0.96	3.74	5.48165	0.000390952	0.00271652
novel.23579	54.2	42.01	48.69	92.23	100.42	97.48	1.37688	3.43395e-36	3.33728e-34
novel.261	107.06	109	115.18	455.48	473.76	406.07	2.40028	1.62765e-140	2.21884e-137
GeneID:107828937	25.66	26.7	22.51	47.66	32.38	35.19	1.0372	1.80872e-09	2.89804e-08
novel.12659	0.76	0.6	0.88	4.62	5.09	5.11	3.11049	3.0322e-17	9.94415e-16
GeneID:107782641	0.37	0.13	0.28	0.94	1.53	0.67	2.39554	0.0004266	0.00293591
GeneID:107779286	0.96	1.13	1.04	2.25	1.49	2.03	1.29695	0.00210057	0.0121545
GeneID:107803385	0.65	0.61	0.39	0.81	0.88	1.06	1.10336	0.00530252	0.0271996
GeneID:107781555	1.54	2.2	2.03	3.2	3.29	3.59	1.17911	2.82844e-05	0.000247809
novel.16377	0.23	0.36	0.41	1.39	1.09	1.33	2.31872	4.08893e-05	0.000347969
novel.24174	128.9	124.23	136.36	703.49	667.08	580.75	2.74496	8.13386e-155	1.32343e-151
novel.982	6.24	6.57	8.44	27.49	38.42	33.16	2.58432	7.18323e-78	2.49872e-75
GeneID:107786813	0.34	0.24	0.48	0.58	0.59	0.77	1.21692	6.20998e-05	0.000510638
novel.26509	1.33	0.97	1.1	7.1	6.41	5.75	1.73838	1.28033e-07	1.61365e-06
novel.16094	0.3	0.11	1.19	3.31	3.95	4.33	3.22873	3.19078e-09	4.94742e-08
GeneID:107760115	0.71	0.49	0.45	1.13	0.82	1.46	1.40251	1.78524e-05	0.000161604
GeneID:107793447	5.77	8.93	6.66	38.19	46.39	38.72	2.24689	3.51182e-21	1.46512e-19
novel.10954	0.08	0.17	0	1.09	1.05	1.06	4.14282	6.20166e-05	0.00051012
novel.20491	12.43	14.18	15.32	24.54	24.72	30.72	1.29807	1.43904e-24	7.3764e-23
GeneID:107779293	0.6	0.39	0.36	0.84	1.3	1.22	1.67664	0.00011112	0.00086977
novel.14083	0.73	1.2	0.95	12.14	17.27	16.93	4.54158	1.11093e-25	6.15087e-24
novel.6469	0	2.62	0	11.52	9.31	8.94	4.24799	0.00592544	0.0299352
GeneID:107811935	0.71	0.68	0.63	1.59	2.14	1.52	1.77339	3.15624e-07	3.7671e-06
GeneID:107777218	1.36	1.95	1.85	4	4.37	3.05	1.04455	7.23583e-06	7.00918e-05
novel.14251	2.77	2.13	1.25	3.12	4.84	4.19	1.42674	0.00225595	0.012954
GeneID:107809450	0	0	0	1.1	0.14	0.58	4.64991	0.00968065	0.045447
novel.16461	0.73	0	0.97	4.22	1.27	4.8	3.1007	0.0017022	0.0100854
novel.7682	0	0	0.17	1.14	2.34	0.45	4.75666	0.00149563	0.00897963
novel.23977	0.73	0.55	0.75	1.89	3.79	3.75	2.61743	7.05509e-07	8.01829e-06
novel.5174	0.29	0	0.36	0.97	0.88	1.94	2.91919	0.000640201	0.00423434
novel.23021	1.35	1.44	2.1	4.35	5.5	2.89	1.8094	3.53285e-05	0.000304085
novel.23915	0.26	0.55	0.7	2.11	2.88	3.18	2.92911	0.000816769	0.00525472
novel.22575	18.81	21.49	24.66	31.28	34.15	37.46	1.04166	9.35688e-19	3.37832e-17
novel.11246	4.43	5.73	4.56	7.22	6.68	5.58	1.07327	2.22945e-10	3.9429e-09
GeneID:107779384	0.15	0	0.14	0.68	0.62	0.36	2.85788	0.000387767	0.00269699
GeneID:107800106	0.22	0.45	0.4	1.29	0.54	1.21	1.90717	9.56347e-06	9.08593e-05
novel.20915	0.11	0.36	0.1	1.46	1.92	2.96	3.90331	3.52149e-06	3.58539e-05
novel.20527	0	0	0	1.33	1.27	2.95	5.3565	0.000596909	0.00397564
novel.5302	11.93	12.52	12.04	22.81	14.45	18.43	1.13961	8.52039e-05	0.000682918
novel.13297	1.01	0.69	1.2	2.34	1.78	2.61	1.58359	2.43152e-07	2.94109e-06
novel.14084	0.73	1.2	0.95	12.14	17.27	16.93	4.54158	1.11093e-25	6.15087e-24
novel.8803	0	0.37	0.64	2.6	2.01	2.11	3.24391	0.00605837	0.0304938
GeneID:107769807	5.49	4.45	6.01	36.13	39.17	41.76	3.47374	2.01062e-106	1.25202e-103
novel.973	0.24	0.25	0.32	2.08	1.44	0.88	2.85688	0.000613306	0.00407516
novel.6414	4.88	5.32	3.35	8.87	7.55	7.62	1.23868	3.30006e-06	3.38041e-05
novel.38	24.62	23.53	26.03	48.25	39.03	36.95	1.15705	6.98129e-15	1.86115e-13
GeneID:107796977	560.58	560.57	412.48	1720.39	1592.42	1734.63	2.0959	1.25575e-61	2.74193e-59
GeneID:107825625	2.74	3.25	2.55	5.68	6.97	5.82	1.48775	1.47031e-13	3.55008e-12
novel.19798	2.05	1.77	2.43	7.4	5.54	5.84	1.98896	3.83676e-11	7.3304e-10
novel.17411	2.82	1.51	4.38	20.76	20.77	22.81	3.28269	3.25069e-39	3.57995e-37
GeneID:107785335	1.15	1.44	1.41	6	7.69	9.81	2.92269	5.18714e-35	4.81831e-33
novel.17812	0.16	0	0.53	3.97	4.47	3.11	4.38693	0.00231044	0.0132262
GeneID:107821055	2.68	2.55	3	5.25	4.31	3.69	1.09955	5.5867e-07	6.4569e-06
novel.13275	0.62	0.65	0.7	1.68	1.47	1.22	1.52532	1.0542e-07	1.34615e-06
GeneID:107789254	0.42	0.37	0.31	0.85	0.75	1.16	1.7165	0.0094445	0.0445748
novel.1044	0.77	0.72	0.98	2.17	2.9	4.14	2.26812	6.13736e-18	2.11305e-16
GeneID:107820656	0.04	0.04	0.1	0.3	0.18	0.32	2.51247	0.000825289	0.00530345
GeneID:107785572	66.84	66.97	68.17	172.64	151.45	160.91	1.63132	1.19539e-63	2.81748e-61
novel.11491	0.8	1.03	1.27	1.9	1.86	1.62	1.18021	0.000612903	0.00407356
novel.15496	1.2	1.05	1.56	2.12	2.14	2.14	1.12851	0.000252131	0.00183325
GeneID:107772705	333.43	254.96	690.87	1175.99	2630.07	2220.58	2.72075	2.29015e-07	2.78144e-06
GeneID:107764981	0.74	0.16	1.2	5.57	11.91	9.04	4.06337	3.32352e-15	9.1312e-14
GeneID:107781057	34.31	30.11	57.6	85.67	110.03	110.57	1.70591	1.26254e-09	2.05955e-08
novel.18473	0.71	0.75	0.66	1.97	1.26	1.49	1.53533	3.66208e-08	4.97607e-07
novel.22581	0.53	1.08	0.46	6	5.81	8.04	3.88168	2.81812e-05	0.000246991
novel.18432	1	0.64	0.36	5.82	4.28	3.62	3.26286	5.75569e-07	6.63721e-06
novel.2557	0.59	0.25	1.6	12.75	9.49	8.98	4.075	1.92494e-14	4.95873e-13
novel.1676	0.38	0.39	1.32	4.34	5.19	4.92	3.30665	7.57043e-05	0.000613012
novel.4903	0.12	0.25	0.11	2.39	0.47	1.72	3.73056	0.000185197	0.00138572
GeneID:107818548	0.12	0.26	0.27	0.74	0.59	0.54	1.90144	0.000711157	0.00464638
novel.10289	0.75	0.4	0.45	1.88	1.19	1.21	1.86007	0.0100956	0.0471144
novel.26506	0.65	0.78	0.77	3.54	4.35	2.77	2.6585	2.56002e-16	7.78799e-15
GeneID:107807511	0.27	0.4	1.16	1.87	3.7	3.26	2.6447	4.01236e-09	6.13643e-08
GeneID:107805559	7.21	6.81	9.64	70.56	71.35	68.25	1.96486	3.4711e-35	3.23621e-33
novel.9722	0.94	1.06	1.08	14.64	15.83	16.97	4.33256	4.38051e-75	1.41634e-72
GeneID:107796754	15.98	15.5	19.6	30.24	34.42	32.9	1.21243	2.23588e-26	1.28886e-24
GeneID:107800776	0.26	0.18	0.28	0.91	0.63	0.67	2.00025	5.0285e-06	5.00558e-05
novel.11253	0	0.39	0.11	1.47	1.27	2.58	3.87403	4.55968e-05	0.000385042
novel.14021	0.21	0	0.57	2.52	3.22	1.82	3.6966	0.000161073	0.00122226
novel.14387	0.51	0.27	0	2.65	3.03	1.96	3.82441	0.000405236	0.00280303
novel.1897	0	0.3	0.25	2.09	1.24	1.72	3.69441	0.00600279	0.0302744
novel.3	0.96	0.98	0.35	2.6	3.47	1.16	2.06412	3.47557e-06	3.54294e-05
novel.23530	1.61	1.92	1.75	3.47	2.92	3.84	1.33783	1.97034e-08	2.77836e-07
GeneID:107797741	4.32	5.16	3.63	7.95	6.72	6.07	1.04458	1.74147e-07	2.15659e-06
GeneID:107777739	12	13.75	15.5	23.13	27.93	30.32	1.34195	2.06638e-32	1.67297e-30
novel.17065	3.9	0	2.78	5.72	20.65	25.13	3.77968	0.00637067	0.031818
novel.954	0.6	0.79	0.91	1.75	2.74	2.19	1.9191	1.54967e-05	0.000142013
GeneID:107770348	0.15	0.09	0.29	0.38	0.71	0.4	1.8521	0.00341731	0.0185619
novel.4852	0.16	0.52	0.36	0.48	1.64	3.6	3.01348	0.00133903	0.00815498
novel.7288	4.1	3.96	4.92	15.88	12.88	11.34	2.00692	5.52469e-32	4.38145e-30
GeneID:107771932	0.42	0.63	0.84	1.52	1.51	1.37	1.10976	0.0053913	0.0275905
novel.8477	0.59	0.68	0.86	9.74	7.23	7.85	3.93384	2.40445e-41	2.88071e-39
GeneID:107819763	1.36	1.97	1.95	11.1	11.91	10.43	2.17722	2.09053e-24	1.05762e-22
GeneID:107830244	15.08	14.33	18.09	25.53	28.17	29.14	1.1705	6.07787e-28	3.85127e-26
novel.27156	0.26	0.42	0	0.79	0.63	2.33	2.91342	0.00399372	0.0212534
GeneID:107831864	1.96	2.18	2.59	4.65	2.87	4.2	1.20502	0.000293099	0.00210203
GeneID:107761433	2.61	2.96	1.93	4.71	4.46	2.93	1.07847	0.000118458	0.000921772
GeneID:107805519	17.61	15.05	24.2	32.73	29.5	31.12	1.08145	3.70556e-14	9.38277e-13
GeneID:107825910	0	0	0	11.03	10.92	10.51	8.01625	1.16021e-10	2.11111e-09
novel.26878	3.08	1.78	3.33	6.04	8.24	8.19	1.83641	4.03536e-11	7.69235e-10
novel.292	0.49	1.37	0.71	4.67	4.21	5.01	3.71357	2.02809e-33	1.73971e-31
novel.8445	5.74	3.44	10.17	8.88	11.54	13.3	1.20429	1.98751e-05	0.000178601
GeneID:107807700	0.75	0.64	0.49	3.04	3.2	1.82	2.47167	1.02606e-09	1.6935e-08
novel.4746	0	0	0	5.55	6.13	4.28	6.04924	1.98752e-05	0.000178601
novel.20635	0.36	0.44	0.41	1.97	1.56	1.94	2.54536	3.89563e-18	1.35325e-16
novel.19615	1.59	0	2.02	5.56	3.32	7.23	2.77435	0.00610873	0.0307196
novel.12976	1.7	1.29	2.7	13.88	12.73	14.1	3.22181	5.069e-38	5.30447e-36
GeneID:107821039	1.52	1.25	1.7	2.91	3.66	4.18	1.64352	4.15626e-08	5.60529e-07
novel.13642	1.89	1.01	1.71	6.08	6.34	5.8	2.37113	2.46456e-15	6.8528e-14
GeneID:107795781	0	0	0	0.22	0.35	0.14	5.35401	0.000592133	0.00394695
novel.24660	0	0	0	0.64	0.98	2.08	6.21427	1.17414e-05	0.000110099
GeneID:107784165	1.97	1.44	2.23	3.06	3.73	2.8	1.13644	1.77063e-06	1.89173e-05
novel.22258	0.48	0.56	0.62	1.79	2.35	1.39	2.11278	1.26573e-07	1.59661e-06
novel.2606	1.19	1.22	0	8.41	3.76	4.85	3.465	0.000480747	0.00327194
novel.12576	1.93	1.47	1.36	1.53	4.17	3.08	1.25781	0.00126063	0.00772601
GeneID:107817747	1.35	1.35	1.47	3.15	2.58	3.42	1.54387	0.00013992	0.00107321
GeneID:107816127	1.83	0.65	2.3	2.62	4.38	2.76	1.43577	0.0017049	0.0100991
novel.10456	0.71	0.9	0.7	1.45	2.32	2.18	1.72662	1.17892e-07	1.49406e-06
novel.2382	0	1.47	1.19	19.68	8.71	5.29	4.27507	0.000812737	0.00523279
novel.12188	0.43	0.81	1.27	1.96	2.18	1.41	1.56854	0.00727193	0.0357064
GeneID:107782117	0.21	0.18	0.06	0.63	0.38	0.58	2.21065	0.00130678	0.00797881
novel.24565	1.23	1.31	1.03	2.8	3.88	1.74	1.64887	0.000272761	0.00196906
GeneID:107773482	34.14	29.96	35.8	54.9	59.56	39.59	1.01319	3.88975e-12	8.19186e-11
novel.14788	2.21	2.97	3.58	4.54	6.85	6.86	1.49403	6.92679e-05	0.000564518
novel.12584	0.12	0.33	1.1	0.88	1.47	1.53	1.70557	0.00541717	0.0277032
GeneID:107814879	2.48	1.83	2.81	4.31	4.48	4.12	1.25902	5.28557e-05	0.000440587
novel.6231	0.46	0	0.96	3.1	2.89	1.84	2.87378	9.29355e-05	0.000739248
novel.22427	1.9	2.24	2.06	5.17	5.03	4.81	1.66018	4.34508e-09	6.6152e-08
novel.20393	1.34	0.78	0.44	1.47	3.12	1.48	1.67457	0.00765937	0.037287
novel.27135	19	20.49	22	41.42	46.53	41.42	1.41195	9.58162e-33	7.89685e-31
[truncated: 2,325 more rows]

## Sheet: ATG5 VS WT Down
GeneID	WT-1	WT-2	WT-3	ATG5-1	ATG5-2	ATG5-3	log2(FC)	P Value	FDR
GeneID:107794066	12.71	12.97	12.38	3.47	3.56	4.08	-1.41247	1.36506e-21	5.81521e-20
GeneID:107811889	139.86	143.93	133.54	52.06	49.81	54.65	-1.04974	1.01725e-28	6.77797e-27
novel.15601	6.22	4.93	0.27	0.08	0.24	0.33	-3.7637	0.00326909	0.0178723
GeneID:107771652	4.86	5.85	7.55	2.09	1.85	1.8	-1.27689	1.683e-06	1.80422e-05
GeneID:107824015	2.51	2.91	1.89	0.24	0.68	0.52	-1.95055	0.00151845	0.00910258
GeneID:107823604	1.91	1.27	2.38	0	0.38	0.29	-2.63812	0.00208157	0.0120598
novel.8389	24.49	20.21	24.14	6.95	8.25	8.76	-1.12533	8.3383e-11	1.54396e-09
GeneID:107772313	6.46	7.16	4.76	1.78	2.12	3	-1.01525	0.00112318	0.00696057
GeneID:107771792	24.3	24.47	22.08	9.07	8.96	8.53	-1.04598	7.62e-17	2.42184e-15
novel.9961	3.46	4.24	3.6	0.81	0.64	0.98	-1.85445	2.0045e-09	3.19144e-08
GeneID:107817763	149.9	186.06	196.66	56.71	50.7	83.67	-1.00463	8.46659e-10	1.41266e-08
GeneID:107779220	2.63	2.38	3.12	0.76	0.53	0.56	-1.77315	8.52451e-08	1.10418e-06
GeneID:107779431	3.99	4.82	4.87	2.38	1.62	1.03	-1.0294	0.00358051	0.0193276
GeneID:107797586	1.76	2.97	3.79	0.26	0.95	0.42	-1.92737	0.00963434	0.0452759
GeneID:107772834	2	2.48	1.23	0.2	0	0.38	-2.90969	2.27268e-05	0.000202422
GeneID:107829750	43.27	39.11	33.59	11.93	14.21	11.86	-1.19743	3.47808e-12	7.36177e-11
GeneID:107796337	54.91	58.95	67.89	4.47	6.36	14.58	-2.33098	2.03482e-18	7.18226e-17
GeneID:107821091	1.54	1.56	1.06	0.5	0.24	0.47	-1.38991	0.00617408	0.031002
GeneID:107815205	540.42	556.28	548.44	192.2	192.16	209.48	-1.05995	5.47583e-35	5.06781e-33
GeneID:107788495	0.54	0.88	0.37	0.04	0.12	0.06	-2.69861	9.67567e-05	0.000766261
GeneID:107826230	1.26	1.53	1.16	0.4	0.38	0.38	-1.42724	1.46677e-08	2.09938e-07
GeneID:107811966	357.1	359.25	374.36	77.71	83.65	91.81	-1.73227	4.09633e-92	2.00597e-89
GeneID:107784714	5.86	6.14	7.74	1.69	2.26	2.21	-1.2581	3.11737e-06	3.2063e-05
novel.9848	3.7	4.86	2.06	0.68	0.86	0.36	-1.96063	0.0102971	0.0478818
novel.20835	1.69	1.63	2.07	0	0.12	0.25	-3.46196	0.0019076	0.0111595
novel.23143	3.21	2.29	3.58	1.18	1	1.17	-1.03245	0.00703896	0.034726
novel.10001	2.19	0.9	1.71	0.23	0.25	0.42	-1.97225	0.00938714	0.0443248
GeneID:107778257	41.01	39.41	39.02	13.52	15.46	15.67	-1.04982	6.29304e-22	2.73162e-20
GeneID:107791448	43.47	43.19	36.08	5.85	2.6	5.83	-2.62665	1.46727e-18	5.23762e-17
GeneID:107808072	8.35	10.73	7.9	2.7	2.86	3.95	-1.12171	2.73567e-06	2.83918e-05
GeneID:107818419	29.71	33.08	36.11	10.04	12.75	12.95	-1.08082	1.74657e-14	4.52931e-13
GeneID:107813959	521.9	539.27	465.57	102.62	104.02	117.45	-1.86512	1.59005e-75	5.20782e-73
GeneID:107793682	32.51	34.93	28.47	10.03	11.68	12.32	-1.11974	7.26391e-16	2.13014e-14
novel.1296	3.22	1.98	2.42	0.16	0.23	0.8	-2.31481	3.54287e-05	0.000304843
GeneID:107777566	27.86	24.57	21.94	6.6	4.45	4.24	-1.85661	6.31922e-16	1.86395e-14
GeneID:107816280	0.27	0.26	0.33	0.03	0.14	0.07	-1.59708	0.00787724	0.0382039
GeneID:107762859	392.67	367.64	289.85	113.74	106.77	111.83	-1.2488	6.72426e-23	3.12594e-21
GeneID:107821743	12.57	13.93	11.45	4.43	4.95	4.31	-1.05878	1.10895e-06	1.22395e-05
GeneID:107766272	0.59	0.8	1.03	0.03	0.28	0.04	-2.40268	0.00203354	0.011825
GeneID:107803869	15.44	18.6	19.03	6.12	6.77	5.74	-1.07071	1.65769e-05	0.00015087
GeneID:107810052	5.94	4.91	5.89	2.3	1.13	2.15	-1.19743	5.05244e-06	5.02841e-05
novel.5419	2.83	2.68	3.77	0.48	0.33	1.06	-1.89876	0.00012233	0.000948675
GeneID:107823693	7.71	8.27	9.77	3.03	3.18	3.41	-1.03645	1.7049e-07	2.11598e-06
GeneID:107816750	4.89	2.91	3.03	1.21	1.35	1.16	-1.15886	0.00536668	0.0274896
GeneID:107765598	268.96	246.15	234.28	74.07	73.98	93.42	-1.1971	2.71108e-23	1.2864e-21
GeneID:107799219	10.97	10.49	9.62	2.68	3.57	3.57	-1.29888	9.39766e-15	2.48823e-13
novel.16	54.21	47.39	56.59	3.6	6.73	9.36	-2.63233	4.96734e-14	1.24611e-12
GeneID:107808687	1.95	2.48	1.86	0.89	0.63	0.75	-1.07878	0.0017682	0.0104409
GeneID:107821577	3.67	4.77	5.1	1.02	1.37	1.2	-1.53052	4.04741e-07	4.75979e-06
GeneID:107818977	8.06	7.97	8.08	2.7	2.8	3.08	-1.09381	8.69314e-07	9.75469e-06
novel.25841	15.83	20.01	20.52	4.26	5.27	4.37	-1.65166	7.2023e-32	5.66734e-30
GeneID:107771497	106.6	103.56	87.08	26.71	38.56	40.78	-1.02884	2.35049e-11	4.60056e-10
novel.13214	7.91	6.48	6.32	0.52	1.02	0.84	-2.71068	5.11288e-10	8.74199e-09
GeneID:107831913	1816.37	726.89	594.78	0	0	0	-13.8083	1.04766e-22	4.78648e-21
GeneID:107774813	6.73	5.28	3.79	0.14	0.44	0.3	-3.70021	1.89318e-06	2.0099e-05
GeneID:107811192	1.35	1.08	2.82	0.32	0.59	0.28	-1.77789	0.00660058	0.0328265
novel.22812	25.78	19.04	29.91	1.89	3.47	4.14	-2.59881	4.286e-32	3.41519e-30
GeneID:107820924	4.32	4.34	3.43	1.02	1.02	0.77	-1.7384	1.12901e-08	1.63827e-07
GeneID:107829077	11.71	12.1	11.38	2.33	2.49	2.87	-1.72237	1.07867e-10	1.97056e-09
GeneID:107787771	2.64	2.71	2.29	0.82	1.26	0.63	-1.1252	0.000729938	0.00475676
novel.13308	1.5	3.31	3	0.32	0.52	0.18	-2.51426	0.000190899	0.00142334
GeneID:107796783	40.97	36.25	47.23	12	14.27	18.24	-1.12106	8.59715e-18	2.92994e-16
GeneID:107764101	40.07	38.55	39.06	12.93	14.39	13.8	-1.14543	3.20292e-26	1.82338e-24
GeneID:107780472	4.95	5.6	5.27	1.8	2.19	1.44	-1.17224	1.05842e-07	1.35119e-06
GeneID:107765675	17.91	14.34	11.92	3	4.69	5.16	-1.3956	7.31342e-09	1.08272e-07
GeneID:107819600	3.79	4.29	4.05	0.87	0.93	1.03	-1.6815	0.000302261	0.00215885
GeneID:107774312	2.17	1.73	3.77	0.21	1.24	0.75	-1.48155	0.000864464	0.00553123
GeneID:107818812	1101.84	1154.34	845.17	358.11	331.44	307.09	-1.17967	8.64217e-20	3.32243e-18
novel.8881	7.48	8.61	6.01	2.09	2.19	2.04	-1.41788	9.59365e-08	1.23285e-06
GeneID:107812400	21.75	26.6	20.9	1.22	0.71	2.91	-3.36757	1.58132e-16	4.89028e-15
novel.5567	7.5	8.87	8.41	1.69	3.58	3.33	-1.14793	1.42981e-05	0.00013194
GeneID:107761649	2.96	2.46	2.49	0.79	0.76	0.99	-1.26952	2.47063e-07	2.98553e-06
GeneID:107831658	6.02	4.91	5.57	1.74	2.61	2.01	-1.00728	6.1927e-06	6.06748e-05
GeneID:107817947	74.69	72.98	71.46	21.16	20.05	26.69	-1.28756	2.40952e-22	1.07267e-20
novel.27300	22.22	14.33	18.09	3.76	3.53	5.12	-1.71103	2.66863e-10	4.68673e-09
GeneID:107802006	0.36	0.38	0.27	0.14	0.12	0.1	-1.12031	9.00324e-05	0.000718195
GeneID:107767895	2.58	2.94	2.58	0.93	0.71	1.28	-1.08702	0.00312196	0.0171834
GeneID:107793104	4.74	4.89	5.21	1.96	1.46	2.09	-1.03551	0.000404967	0.00280156
GeneID:107814657	1.76	0.68	0.49	0.19	0.21	0.21	-1.91905	0.00625847	0.031329
GeneID:107767589	2.99	2.28	3.18	1.01	1.12	0.77	-1.17955	0.00184057	0.0108138
GeneID:107807842	176.81	194.43	120.76	40.98	50.59	37.58	-1.18652	2.07402e-05	0.000185745
GeneID:107809789	5.74	5.32	5.97	1.34	1.99	2.15	-1.22466	9.65701e-05	0.000764903
GeneID:107762263	2.4	2.22	2.24	0.8	0.44	1.05	-1.20139	0.000301012	0.00215114
GeneID:107777858	16.7	15.16	21.75	5.27	7.16	6	-1.16456	6.17813e-12	1.27975e-10
GeneID:107809975	14.72	16.2	13.5	0.93	2.73	2.86	-2.35464	3.39941e-12	7.20129e-11
GeneID:107809091	1.36	1.02	1.1	0.13	0.19	0.19	-2.42843	1.41302e-07	1.7738e-06
novel.10553	7.73	5.9	5.33	1.98	2.29	2.02	-1.16868	0.00164002	0.00975667
GeneID:107779921	7.68	6.16	7.58	1.64	2.4	2.68	-1.2938	2.94259e-07	3.52293e-06
novel.21022	3.47	2.63	2.24	0.23	0.45	0	-3.07402	0.00941207	0.0444301
GeneID:107762187	1.87	1.83	1.31	0.5	0.44	0.66	-1.2629	0.00353685	0.0191206
GeneID:107787219	23.97	26.27	17.81	2.34	2.98	2.04	-2.80823	1.01228e-45	1.4246e-43
GeneID:107789263	54.85	45.44	44.63	9.38	10.53	12.22	-1.76835	3.90577e-25	2.0869e-23
GeneID:107774827	19.94	18.55	19.11	5.31	5.68	5.69	-1.42453	4.91759e-33	4.16871e-31
novel.8394	10.89	10.15	7.85	3.67	3.6	3.11	-1.10008	5.12773e-07	5.95117e-06
GeneID:107826001	1.26	1.56	1.66	0.25	0.59	0.43	-1.4555	0.00269028	0.0151091
novel.17268	3.42	4.02	4.51	1.17	1.15	1.23	-1.24321	0.00271187	0.0152185
GeneID:107816842	0.77	0.21	0.06	0	0	0	-4.79845	0.00639025	0.0319063
GeneID:107832090	1.57	2.41	2.51	0	0.14	0.14	-4.13051	0.00100345	0.00630773
novel.6789	2.56	1.9	1.79	0.23	0.25	0.77	-1.97865	6.56067e-05	0.000537372
GeneID:107794459	5.09	4.22	4.52	1.1	1.48	1.62	-1.34829	9.01959e-07	1.01075e-05
novel.15779	20.73	20.12	21.18	7.77	6.55	7.24	-1.11174	3.88689e-09	5.95718e-08
GeneID:107778953	5.71	5.99	5.45	0.96	0.34	1.65	-2.12673	1.86077e-06	1.97965e-05
GeneID:107764510	2.35	1.75	4.16	0.39	1.48	0.9	-1.2003	0.00417449	0.0220756
novel.17724	1.37	1.15	2.03	0	0.16	0	-4.44639	0.000293144	0.00210206
GeneID:107765014	14.41	18.22	15.54	6.02	5.48	6.47	-1.04209	1.2872e-09	2.09774e-08
novel.6955	4.13	4.79	2.77	0.42	0.87	0.82	-2.0784	3.74305e-07	4.42144e-06
GeneID:107770879	152.57	144.88	146.31	41.22	50.32	52.04	-1.20813	1.56805e-25	8.65325e-24
GeneID:107825164	0.3	0.33	0.51	0	0	0.04	-4.28714	0.00472746	0.0246102
novel.4135	44.65	42.31	36.05	13.52	12.32	12.67	-1.30053	1.29875e-22	5.90693e-21
GeneID:107799273	1.81	2.23	1.29	0.12	0.4	0.27	-2.38779	2.40746e-05	0.00021341
GeneID:107790627	76.82	85.98	81.07	22.16	23.93	27.89	-1.32885	3.51476e-29	2.39569e-27
GeneID:107775567	1.12	1.13	1.21	0.3	0.36	0.3	-1.52402	0.00199166	0.0116069
novel.16954	9.53	8.49	8.41	1.27	3.08	4.03	-1.25195	0.000297276	0.00212715
GeneID:107798154	19.06	15.7	13.68	1.61	2.67	3.2	-2.30546	5.50579e-18	1.9008e-16
GeneID:107812918	161.42	105.89	137.98	2.92	68.99	73.88	-1.35755	9.86533e-07	1.09821e-05
GeneID:107796761	7.18	5.96	6.04	2.67	2.34	1.88	-1.04871	0.00319419	0.0175217
GeneID:107764257	5.48	5.33	5.94	1.86	1.81	2.46	-1.06694	4.66693e-05	0.000393177
GeneID:107801737	1.04	1.08	0.81	0.08	0.14	0	-3.27078	0.00434237	0.0228341
GeneID:107771893	5.06	3.97	4.55	1.02	1.33	1.54	-1.43243	9.73129e-08	1.24958e-06
GeneID:107799247	19.31	21.28	17	6.14	5.72	5.68	-1.34406	5.87151e-19	2.15071e-17
novel.695	12.33	14.07	14.2	3.35	3.42	4.62	-1.45253	1.42726e-14	3.72423e-13
novel.2296	3.11	4.31	6.41	0.75	0	0.51	-2.9409	0.00213103	0.0123044
GeneID:107759508	1.14	1.16	0.99	0.21	0.27	0.49	-1.40496	0.000168018	0.00127076
GeneID:107763051	1.46	1.31	1.67	0.57	0.36	0.42	-1.32705	0.000184469	0.0013815
GeneID:107808976	2.08	1.88	1.89	0.53	0.36	0.92	-1.35556	0.00153365	0.00918496
GeneID:107796746	8.66	10.02	8.62	2.95	2.24	2.32	-1.45818	3.60022e-08	4.89831e-07
GeneID:107800030	0.39	0.34	0.61	0.05	0.06	0.06	-2.56466	0.00444704	0.023314
GeneID:107766240	2.77	3.12	3.28	0.64	0.91	0.81	-1.56589	8.62559e-05	0.000690691
novel.19562	152.14	156.16	116.91	33.23	39.51	40.74	-1.52215	6.62335e-30	4.73194e-28
GeneID:107821192	39.36	37.91	33.56	15.07	11.74	14.45	-1.05654	7.69475e-14	1.89695e-12
novel.2461	10.83	10.53	6.16	3.11	3.83	3.31	-1.01217	2.50688e-06	2.61682e-05
GeneID:107796635	5.87	6.11	5.54	1.96	2.26	2	-1.09367	0.000301499	0.00215421
GeneID:107827611	0.34	0.35	0.4	0.02	0.05	0.15	-1.87175	0.00965001	0.0453327
GeneID:107826954	101.46	87.78	74.93	19.55	29.59	28.01	-1.32127	2.06559e-13	4.91214e-12
GeneID:107782056	3.64	4.06	3.64	0.96	1.47	1.24	-1.25754	1.91425e-05	0.000172415
novel.7952	5.64	8.91	6.34	0.42	2.3	1.67	-1.80556	0.00011381	0.00088875
GeneID:107783683	2.55	3.38	2.26	0.27	0.24	0.59	-2.63085	3.72676e-08	5.05307e-07
GeneID:107785545	1.18	0.29	0.25	0.04	0.05	0	-3.87501	0.00413931	0.0219056
GeneID:107765645	1.57	0.9	1.63	0.27	0.1	0.1	-2.68419	0.00613831	0.0308407
GeneID:107817836	8.94	8.16	7.41	2.14	3.32	2.69	-1.17564	1.81586e-06	1.93351e-05
novel.12408	16.66	18.3	13.09	2.48	4.05	3.87	-1.81309	3.2025e-13	7.46792e-12
GeneID:107781606	488.51	518.79	491.5	49.79	48.05	47.44	-2.94429	1.74891e-190	5.18901e-187
novel.27671	1.19	1.26	7.8	0.64	0.13	0.54	-2.49267	0.00357016	0.0192821
GeneID:107819131	2.21	1.84	2.02	0.38	0	0.87	-1.97358	0.00375654	0.0201699
GeneID:107806473	7.25	8.15	5.7	2.39	2.64	2.37	-1.14995	7.72109e-07	8.71434e-06
GeneID:107809443	15.88	16.08	14.43	5.23	6.45	5.27	-1.09015	1.44743e-15	4.11306e-14
GeneID:107801389	0.42	0.43	0.43	0.05	0.14	0.12	-1.8503	0.00207819	0.012043
GeneID:107798792	6.17	3.89	5.86	1.16	1.14	1.57	-1.64255	1.80442e-06	1.92295e-05
novel.8208	70.53	72.79	60.23	2.2	6.76	14.65	-2.53226	0.000239217	0.00175096
GeneID:107824172	2.57	2.12	2.96	1.08	0.93	0.71	-1.11596	0.000130977	0.00101107
GeneID:107796671	1.68	1.98	1.6	0.64	0.46	0.86	-1.03072	0.00263633	0.0148375
GeneID:107799151	61.24	55.09	53.86	12.17	20.01	18.42	-1.33221	1.31274e-14	3.43966e-13
GeneID:107790852	1.01	0.97	1.06	0.24	0.34	0.45	-1.19055	0.00480707	0.0249628
novel.23787	11.1	5.38	7.57	0.38	0	0	-5.27323	0.00012466	0.000965557
novel.10669	5.89	4.23	4.81	1.44	1.03	1.57	-1.49655	4.71626e-06	4.71057e-05
GeneID:107768551	6.21	6.55	5.7	1.31	1.13	1.14	-1.95509	2.33244e-08	3.2598e-07
GeneID:107802307	0.31	0.38	0.46	0.05	0.04	0.12	-2.03564	0.0060381	0.0304069
GeneID:107801516	73.61	27.22	26.48	6.18	0.77	0.17	-3.7231	0.00460092	0.0240358
GeneID:107776146	1.89	2.22	1.85	0.43	0.32	0.85	-1.46236	0.00864326	0.0413857
GeneID:107798281	0.25	0.25	0.36	0	0.01	0.02	-4.72957	2.35277e-08	3.28548e-07
GeneID:107807743	1.73	1.68	1.73	0.49	0.53	0.43	-1.47261	9.87796e-07	1.09937e-05
GeneID:107793217	31.23	27.5	30.15	10.56	11.89	11.32	-1.01161	3.81148e-14	9.63163e-13
GeneID:107802430	14.16	10.24	18.23	3.38	2.89	5.14	-1.45703	6.12633e-06	6.01179e-05
GeneID:107796277	33.97	33.58	36.34	11.43	10.65	14.12	-1.11253	2.56828e-12	5.49371e-11
GeneID:107764973	3.95	5.16	3.41	0.11	0.93	0.88	-2.38327	0.000513595	0.00347441
GeneID:107788380	17.33	18.16	15.96	6.14	7.28	6.42	-1.01023	8.30128e-15	2.20489e-13
GeneID:107806126	2.32	1.69	3.64	0.28	0.49	0.99	-1.7059	0.00819482	0.0395312
GeneID:107800347	0.77	0.44	0.43	0.1	0.09	0.04	-2.58239	0.00910806	0.0432075
GeneID:107786986	188.93	193.35	161.49	54.48	61.21	71.86	-1.14214	1.01749e-20	4.1522e-19
GeneID:107823598	3.35	2.92	2.66	1.12	0.58	0.93	-1.35929	0.00123135	0.00756677
GeneID:107823477	22.89	23.77	27	5.44	7.45	8.54	-1.38652	1.83912e-14	4.74978e-13
GeneID:107795073	2.33	1.39	1.31	0.11	0.34	0.12	-2.70792	0.00555832	0.0283245
GeneID:107825162	2.49	2.01	1.98	0.71	0.94	0.75	-1.06585	0.000780452	0.00505266
GeneID:107794005	677.58	694.43	653.75	222.26	216.17	197.37	-1.27529	1.15649e-39	1.30497e-37
GeneID:107808319	125.81	117.41	122.77	37.68	40.84	52.33	-1.10884	3.26408e-22	1.44419e-20
GeneID:107784032	1.27	1.14	3.43	0.15	0.33	0.4	-2.34705	0.00158772	0.00947614
GeneID:107822032	273.66	269.54	242.77	91.01	90.59	95.96	-1.12596	1.77174e-30	1.3065e-28
GeneID:107800453	12.59	13.09	14.88	3.59	3.92	3.97	-1.40468	1.07029e-08	1.55575e-07
GeneID:107817512	6965.9	6785.02	6072.58	1344.18	1457.41	1603.28	-1.75829	1.2537e-70	3.51309e-68
novel.15175	21.93	14.68	18.5	6.1	7.41	4.57	-1.18704	9.85776e-07	1.09761e-05
GeneID:107815871	1.63	1.82	1.7	0.49	0.77	0.75	-1.00815	0.0089603	0.0426326
novel.2551	3.44	5.56	3.57	1.3	1.78	0.64	-1.05854	0.000246135	0.00179482
novel.21465	22.9	21.68	19.05	2.99	3.57	3.45	-2.16542	9.29967e-33	7.70224e-31
GeneID:107787906	2.79	3.67	2.27	1.09	1.13	0.95	-1.08284	0.000944313	0.0059867
GeneID:107771251	4.6	5.97	3.72	1.49	0.88	1.37	-1.521	0.000223746	0.00164584
GeneID:107832558	4.72	6.27	2.71	1.66	1.49	0.94	-1.32307	0.00430236	0.0226497
GeneID:107770281	3.36	3.34	3.32	1.25	1.1	1.23	-1.08376	0.00496078	0.0256633
novel.6015	6.38	5.13	5.34	1.31	1.27	1.14	-1.79256	1.91358e-10	3.40456e-09
GeneID:107791745	0.94	0.91	0.78	0.2	0.43	0.14	-1.56219	0.00213112	0.0123044
GeneID:107765961	1.92	3.13	2.01	0.77	0.66	0.5	-1.4566	0.00996836	0.0466154
GeneID:107816142	3.48	3.73	2.46	1.28	0.54	0.92	-1.41855	0.000635747	0.0042082
novel.25827	1.75	1.33	2.01	0.35	0.52	0.43	-1.5792	0.00102901	0.00644588
GeneID:107788939	0.44	0.48	0.49	0.15	0.19	0.18	-1.14248	0.00333457	0.0181712
GeneID:107824465	3.11	2.32	2.26	0.43	0.59	0.45	-2.01357	9.4177e-09	1.37767e-07
GeneID:107783796	117.23	115.44	121.38	45.56	44.41	44.14	-1.00677	6.22012e-25	3.25791e-23
GeneID:107790060	0.95	1.22	1.25	0.16	0.37	0.36	-1.58505	0.00781462	0.037933
GeneID:107765685	247.59	243.74	238.43	87.74	89.28	87.93	-1.06347	8.75835e-31	6.53494e-29
GeneID:107828802	33.96	28.75	32.53	5.13	5.69	6.06	-2.07604	3.18524e-24	1.59702e-22
GeneID:107773400	945.11	1009.88	986.95	299.6	319.34	369.98	-1.14026	9.08174e-33	7.53411e-31
GeneID:107770124	2.52	2.58	2.58	1.08	0.44	0.27	-1.65744	0.00598978	0.0302239
GeneID:107795004	12.85	13.98	20.43	1.95	3.23	3.72	-1.9579	5.09914e-09	7.68896e-08
GeneID:107807278	2.41	1.9	1.85	0.52	0.53	0.51	-1.63544	4.01482e-05	0.000342125
novel.10542	5.02	3.57	5.3	0.48	0.72	0.64	-2.53667	3.03442e-14	7.71049e-13
novel.11422	2.95	2.8	3.63	0.25	0.94	1.63	-1.35099	0.00644259	0.0321295
GeneID:107828834	133.31	125.12	117.28	39.56	36.22	41.78	-1.26966	2.6896e-27	1.63841e-25
GeneID:107804645	33.94	34.26	33.11	6.81	6.77	8.85	-1.77301	7.58132e-26	4.26303e-24
GeneID:107829790	2.43	2.02	2.37	0.51	0.61	0.31	-1.86344	8.88767e-05	0.000709873
GeneID:107803550	22.03	26.88	26.24	8.28	9.9	9.68	-1.04766	9.13936e-13	2.03523e-11
GeneID:107814425	5.33	5.26	5.39	1.02	1.2	1.72	-1.59063	0.000169473	0.00128118
GeneID:107829124	3.18	4.17	3.01	0.93	1.62	1.28	-1.07043	0.000267423	0.00193468
GeneID:107821699	4.02	5.5	5.02	1.22	1.21	1.37	-1.64929	4.48207e-07	5.25014e-06
GeneID:107808307	3.7	4.02	3.43	1.24	0.9	0.8	-1.25755	0.00187482	0.0109945
GeneID:107793365	0.36	0.36	0.18	0.08	0.04	0.02	-2.3125	7.04723e-05	0.0005735
GeneID:107817803	13.57	18.19	21.06	5.79	6.35	7.38	-1.01366	1.14233e-05	0.000107356
GeneID:107808981	0.86	0.87	0.83	0.16	0.09	0.26	-1.98335	0.00537726	0.0275328
GeneID:107820787	14.48	18.88	16.72	1.65	3.43	3.1	-2.20261	6.11099e-15	1.63432e-13
novel.1843	9.52	8.88	9.83	2.97	3.26	3.44	-1.15882	1.11074e-08	1.61315e-07
GeneID:107828756	11.28	10.29	12.57	2.41	3.22	4.12	-1.41029	3.25336e-07	3.8766e-06
GeneID:107791191	2.75	1.54	2.7	0.7	0.34	0.72	-1.59481	0.00056034	0.00375588
GeneID:107805188	24.6	22.51	29.62	7.47	8.47	11.21	-1.10846	2.06948e-10	3.67156e-09
GeneID:107806546	8.73	10.04	7.57	2.64	2.43	2.24	-1.46703	1.76729e-11	3.50395e-10
GeneID:107814985	3.29	3.09	2.99	0.58	0.49	0.84	-1.90472	2.27286e-06	2.38488e-05
GeneID:107792118	156.58	154.23	124.05	50.49	48.15	51.88	-1.16376	3.22906e-23	1.52501e-21
novel.23464	35.19	30.79	29.58	6.83	6.61	7.85	-1.76498	1.67944e-24	8.5825e-23
novel.25345	29.73	33.52	25.36	8.97	4.52	12.22	-1.14565	0.00094699	0.00600141
GeneID:107811436	17.34	15.87	17.91	5.85	5.95	5.32	-1.19279	1.17659e-12	2.59039e-11
GeneID:107770757	4.96	4.17	7.54	2.23	2.4	1.1	-1.12534	0.0023369	0.0133656
GeneID:107808693	15.99	13	12.74	0.93	3.18	3.8	-1.87025	6.7307e-05	0.000550048
GeneID:107782102	126.31	110.94	149.97	26.14	37.4	44.57	-1.39626	1.22662e-17	4.14118e-16
GeneID:107799881	1.07	1.44	0.59	0.21	0.15	0.38	-1.71648	0.00536884	0.0274979
GeneID:107787185	175.34	188.43	204.32	42.23	49.48	52.35	-1.60072	1.96168e-63	4.53877e-61
GeneID:107802892	2.46	1.77	2.02	0.87	0.97	0.4	-1.09359	0.00870484	0.0416134
GeneID:107774534	1.5	2.07	2.91	0.51	0.6	0.63	-1.52575	0.00127367	0.00779738
novel.3988	5.53	6.11	7.64	0	0	0	-7.73677	6.60123e-10	1.11358e-08
GeneID:107785940	5.3	5.31	9.67	1.28	2.83	3.18	-1.10335	0.00014101	0.00108042
GeneID:107759202	31.16	30.87	27.79	8.11	9.5	9.57	-1.35167	1.60022e-28	1.05784e-26
GeneID:107775639	4.75	5.06	4.93	0.72	0.67	0.39	-2.62451	2.41508e-07	2.92261e-06
GeneID:107830986	0.94	0.95	0.96	0.25	0.45	0.4	-1.04835	0.00169341	0.0100393
GeneID:107827620	3.28	3.57	2.58	0.56	0.41	0.87	-1.97771	3.51643e-07	4.16938e-06
GeneID:107829166	4.32	3.8	5.16	1.19	1.95	1.14	-1.26505	1.38331e-06	1.50211e-05
GeneID:107815064	1.64	1.67	1.72	0.46	0.57	0.14	-1.68784	0.00892292	0.0424828
GeneID:107780145	9.73	10.9	7.98	2.17	2.16	2.53	-1.68816	1.41425e-15	4.03012e-14
GeneID:107817350	3.94	6.94	4.77	1.7	1.1	0.69	-1.55768	0.00733768	0.0359849
GeneID:107831321	9.41	10.46	6.04	2.94	1.88	2.87	-1.35792	2.8517e-06	2.95111e-05
GeneID:107824906	0.98	1.3	1.99	0.06	0.19	0.38	-2.39653	0.00142845	0.00862559
GeneID:107788498	0.69	0.69	0.51	0.2	0.13	0.22	-1.47449	0.00693091	0.0342666
GeneID:107820613	14.81	14.72	10.31	3.36	4.18	4.25	-1.35565	4.74252e-07	5.53466e-06
GeneID:107773014	26.5	26.94	25.59	8.45	8.48	12.13	-1.05112	7.14245e-10	1.20006e-08
novel.15838	3.53	3.47	2.21	0.84	1.38	1.28	-1.02107	0.00720371	0.035414
GeneID:107771528	2.52	2.27	2.06	0.76	1	0.53	-1.21451	2.73914e-05	0.000240612
GeneID:107815642	54.58	51.98	58.27	14.51	14.08	16.62	-1.46453	4.16014e-29	2.82034e-27
GeneID:107777365	1.96	1.87	2.71	0.47	0.25	0.76	-1.72725	0.00546146	0.0279042
GeneID:107780051	10.53	10.16	10.32	3.82	3.48	4.16	-1.06038	2.51201e-10	4.41937e-09
GeneID:107787047	6.99	7	6.88	1.12	1.71	1.12	-2.02898	8.99276e-16	2.61106e-14
GeneID:107832203	0.33	0.41	0.35	0.08	0.09	0.09	-1.6357	0.00749623	0.0366343
novel.6203	3.07	0.92	2.06	0	0	0	-4.72633	0.00502781	0.0259595
GeneID:107784026	3.09	3.31	3.12	0.7	0.41	0.94	-1.8244	2.83916e-05	0.000248705
GeneID:107802237	3.4	2.36	2.17	0.8	1.06	0.96	-1.13221	0.000114151	0.000891282
GeneID:107787655	5.71	3.8	5.65	0.93	1.37	2.01	-1.52005	0.000329456	0.00233063
GeneID:107831145	125.09	120.88	125.01	38.01	37.11	46.61	-1.2346	8.13218e-33	6.79105e-31
novel.8104	33.14	37.55	24.46	7.31	7.95	11.7	-1.43566	7.08619e-13	1.59491e-11
GeneID:107775933	202.72	177.44	176.21	67.68	70.17	72.79	-1.02718	4.88734e-25	2.5867e-23
GeneID:107821727	173.26	165.48	166.78	47.56	42.75	47.32	-1.49504	5.51351e-50	8.71774e-48
GeneID:107781944	26.62	23.48	24.67	7.13	8.73	8.88	-1.08039	0.000128666	0.000994452
GeneID:107760988	17.62	20.09	16.16	5.05	5.67	6.79	-1.23095	1.2403e-09	2.02918e-08
GeneID:107786188	16.98	14.23	17.93	4.79	4.22	4.26	-1.47286	8.67984e-11	1.60426e-09
GeneID:107800940	9.55	8.95	9.91	1.79	1.5	2.25	-1.99834	4.16685e-23	1.95508e-21
novel.9617	12.75	14.26	15.79	4.54	6	5.63	-1.0114	1.39247e-07	1.74887e-06
GeneID:107810645	1.04	1.5	1.64	0.18	0.23	0.1	-2.66496	1.80099e-06	1.9197e-05
GeneID:107761870	17.94	18.56	19.33	5.24	3.88	7.04	-1.25825	0.00123258	0.00757155
GeneID:107825850	275.69	268.17	283.03	99.57	95.9	98.17	-1.07798	4.72573e-32	3.75964e-30
GeneID:107773505	56.65	56.18	58.86	13.19	20.42	19.06	-1.2927	1.62048e-16	4.99911e-15
GeneID:107787830	10.93	11.01	21.33	3.8	6.51	5.95	-1.03633	5.47111e-06	5.4173e-05
GeneID:107783951	27.68	26.44	27.38	12.49	12	10.8	-1.00055	1.8415e-16	5.66017e-15
GeneID:107790956	0.99	0.62	0.22	0.06	0	0	-4.29205	0.005611	0.028567
GeneID:107814111	5.3	6.1	5.13	1.92	2.25	2.03	-1.04358	1.57916e-07	1.96913e-06
GeneID:107790763	1.31	1.52	0.81	0.31	0.33	0.35	-1.51462	5.16013e-05	0.00043127
GeneID:107776250	2.22	2.38	2.02	0.22	0.83	0.36	-1.8506	0.000672951	0.00442542
GeneID:107767550	0.45	0.87	0.73	0.21	0.07	0.25	-1.59993	0.00570987	0.029006
GeneID:107807891	2.03	2.62	1.6	0.36	0.34	0.28	-2.26944	5.2327e-05	0.000436757
GeneID:107766126	9.17	10.68	8.85	3.18	3.34	3.14	-1.24583	2.16e-22	9.65853e-21
novel.12924	16.47	12.96	21.03	5.61	5.95	5.53	-1.17105	6.61684e-10	1.11584e-08
GeneID:107799623	363.23	331.26	280.09	87.95	75.51	71.74	-1.51385	7.40464e-27	4.38875e-25
GeneID:107811137	0.9	0.97	0.89	0.13	0.38	0.54	-1.08506	0.00879369	0.0419626
GeneID:107820314	0.56	0.13	0.2	0	0.05	0.03	-3.16914	0.00903118	0.0429129
GeneID:107831940	0.64	0.39	0.15	0.09	0	0	-3.22047	0.00920037	0.0435816
GeneID:107815055	8.14	7.46	6.16	2.69	3.01	2.49	-1.04058	8.14016e-07	9.16681e-06
novel.11289	1.2	1.78	1.23	0.61	0.32	0.06	-1.68228	0.00989957	0.0463324
GeneID:107764804	67.63	68	52.92	16.93	13.69	15.87	-1.6101	5.65202e-26	3.20317e-24
GeneID:107799689	1.52	1.49	0.91	0.38	0.2	0	-2.44793	0.00410102	0.0217555
GeneID:107820312	1.66	1.53	1.97	0.39	0.62	0.43	-1.44956	0.00307894	0.0169827
GeneID:107792694	25.91	24.2	27.23	7.57	11.53	9.98	-1.03017	7.24331e-11	1.35063e-09
GeneID:107787082	0.25	0.19	0.11	0	0	0	-5.1782	0.00102518	0.00642429
GeneID:107823657	4.93	4.78	4.54	1.08	2.25	1.86	-1.07296	0.000958678	0.00606405
GeneID:107766866	37.86	44.42	38.5	7.61	8.57	6.53	-1.89862	2.15768e-13	5.11186e-12
GeneID:107804171	4.79	3.73	4.59	0.37	0.41	0.56	-2.91948	2.27958e-16	6.96003e-15
novel.25947	22.57	24.87	19.39	6.78	9.58	9.4	-1.01533	2.57315e-11	5.01301e-10
GeneID:107788853	1.06	1.21	0.54	0.25	0.39	0.2	-1.3656	0.0106886	0.0494066
GeneID:107778929	14.42	13.19	15.83	4.19	5.45	5.06	-1.15962	5.76096e-08	7.62269e-07
GeneID:107802816	7.75	5.75	7.1	2.56	2.69	2.26	-1.04673	0.00050403	0.0034152
GeneID:107790790	4.43	4.81	4.97	1.62	1.44	2.1	-1.08479	6.32833e-06	6.18834e-05
GeneID:107812756	0.48	0.39	0.22	0	0	0	-4.94974	0.00232379	0.0132966
GeneID:107792696	2.88	2.61	2.01	0.55	0.56	0.79	-1.60155	0.000141085	0.00108083
GeneID:107812253	2.13	1.81	1.21	0.34	0.36	0.15	-2.1883	0.0017431	0.0103084
novel.6186	5.65	3.86	5.87	0.65	1.03	0.89	-2.21606	6.58964e-10	1.11199e-08
novel.2956	8.69	8.23	7.79	2.48	2.67	2.77	-1.23675	9.05328e-06	8.63211e-05
GeneID:107766056	63.46	60.75	56.77	11.66	11.79	13.36	-2.07437	2.56817e-49	3.96135e-47
GeneID:107808709	15.17	14.26	11.66	2.26	2.53	3.72	-1.90394	4.47736e-20	1.76433e-18
GeneID:107772853	18.76	23.77	17.18	2.23	3.36	3.02	-2.25995	3.7125e-08	5.03644e-07
GeneID:107774109	2.28	2.31	1.82	0.57	0.74	0.42	-1.51902	0.00143009	0.00863449
GeneID:107777632	0.61	0.41	0.12	0	0.06	0	-4.09051	0.0105133	0.0487171
novel.3638	1.69	1.26	0.84	0.19	0.14	0.35	-2.08444	0.00736516	0.0360952
GeneID:107784324	0.61	0.83	0.97	0.33	0.33	0.2	-1.14331	0.00110133	0.00683861
GeneID:107807928	13.5	16.07	19.54	3.95	7.32	5.64	-1.11562	1.48143e-05	0.000136279
GeneID:107798752	3465.07	3580.07	3098.59	1084.9	1074.08	1057.39	-1.28495	1.70358e-39	1.90525e-37
novel.15299	1.34	2.15	1.31	0	0.09	0.18	-3.75185	0.000523879	0.0035364
GeneID:107825669	18.09	19.23	18.39	6.83	6.01	5.59	-1.22023	1.01938e-18	3.67261e-17
GeneID:107773228	1.09	1.18	1.16	0.3	0.33	0.39	-1.37804	0.00290554	0.0161651
GeneID:107774203	5.17	3.55	6.3	1.14	1.56	1.46	-1.41181	0.00286521	0.0159759
GeneID:107829908	17.41	18.38	16.74	5.47	3.83	3.66	-1.58733	1.62617e-15	4.59767e-14
GeneID:107809169	3.59	3.33	2.61	0.79	0.65	0.66	-1.75835	0.00106636	0.0066526
GeneID:107768614	6.7	4.92	12.66	0.9	1.2	0.96	-2.5303	6.23216e-07	7.14743e-06
GeneID:107772441	3.47	3.42	2.74	1.09	0.95	0.96	-1.29231	0.000296747	0.00212488
GeneID:107773771	12.59	13.42	12.64	3.46	2.84	3.61	-1.58759	1.23382e-20	5.01069e-19
GeneID:107831506	24.83	29.59	27.82	8.3	7.65	7.08	-1.3622	6.65237e-18	2.28258e-16
GeneID:107791458	14.5	13.34	18.4	2.26	2.5	3.44	-2.07837	1.75652e-14	4.55278e-13
GeneID:107803491	0.83	1.28	0.67	0.21	0.31	0.13	-1.72826	0.000475139	0.00323596
novel.6282	7.8	8.25	13.16	2.25	4.22	3.35	-1.18661	3.9973e-06	4.04209e-05
GeneID:107760880	0.95	0.78	0.99	0.03	0.23	0.38	-1.72039	0.0101866	0.0474468
GeneID:107824241	1.77	1.63	1.73	0.22	0.67	0.4	-1.63009	5.90664e-05	0.000488297
novel.20779	2.43	1.98	3	0.81	0.64	0.72	-1.3548	0.00973017	0.0456455
novel.15824	6.05	3.67	0.62	0	0	0	-6.51546	5.12403e-06	5.09564e-05
GeneID:107807744	14.69	14.97	20.81	4.15	5.69	6.41	-1.26262	2.31773e-13	5.48073e-12
GeneID:107783027	14.34	17.71	17.06	7.42	5.39	4.23	-1.12838	1.12293e-07	1.42761e-06
GeneID:107759348	64.21	60.98	61.78	10	12.51	13.81	-1.98453	8.11258e-54	1.50438e-51
novel.8884	2.97	2.51	2.19	0.65	0.77	0.78	-1.40108	0.0026641	0.0149787
GeneID:107804759	2.29	2.47	2.32	0.6	0.69	0.83	-1.37829	1.89217e-07	2.33291e-06
novel.10866	7.58	4.54	11.55	0	1.58	2.67	-1.97151	0.00259154	0.0146278
GeneID:107828571	6.49	8.11	7.15	2.56	2.27	1.61	-1.36513	5.31582e-07	6.15812e-06
GeneID:107799992	2.34	2.49	3.03	0.33	0.69	0.48	-1.96051	0.00410291	0.0217632
GeneID:107769180	30.71	30.97	27.78	6.56	7.15	8.61	-1.59108	4.97111e-18	1.7221e-16
GeneID:107762222	77.85	73.64	73.38	20.14	16.9	20.85	-1.5499	1.63633e-31	1.26587e-29
novel.10379	3.68	7.48	5.66	0	0.45	0.48	-3.48121	0.0105265	0.0487598
novel.17956	2.69	2.32	2.99	0.55	0.25	0.85	-1.86481	0.00124895	0.00765924
GeneID:107774816	10.55	10.77	9.01	1.39	2.59	1.78	-1.98341	1.92989e-09	3.08142e-08
GeneID:107807298	99.51	88.05	81.99	23.34	21.54	27.26	-1.39838	1.62776e-15	4.59957e-14
GeneID:107801774	0.49	0.19	0.24	0	0	0	-5.14793	0.00115792	0.00715566
novel.14626	5.89	9.87	7.25	1.75	3.16	2.11	-1.27232	0.00141186	0.0085428
GeneID:107807034	2.55	3.24	3.65	0.97	1	1.18	-1.18553	0.00185557	0.0108893
GeneID:107792354	1.62	2.22	2.53	0.14	0.81	0.56	-1.72359	0.00498617	0.0257761
GeneID:107830420	3.43	3.55	3.12	1.12	1.41	1.09	-1.11917	0.000151828	0.00115856
GeneID:107763666	59.84	60.4	56.18	17.15	17.25	18.2	-1.37605	9.4316e-40	1.06664e-37
GeneID:107816619	2.06	1.71	2.28	0.29	0.69	0.44	-1.69458	0.00204639	0.0118873
GeneID:107830568	4.75	4.47	4.8	0.9	0.29	1.22	-2.16115	1.16705e-06	1.28385e-05
GeneID:107822543	7.29	6.76	7.32	1.67	2.42	2.93	-1.24222	1.28012e-08	1.84375e-07
GeneID:107812569	5.53	5.03	5.37	1.51	1.74	1.74	-1.29982	5.56477e-08	7.38052e-07
novel.11924	10.39	11.71	10.48	2.78	4.49	4.1	-1.15271	1.64325e-09	2.64466e-08
GeneID:107759759	21.77	22.32	20.44	6.62	6.42	6.93	-1.30602	2.06789e-15	5.81394e-14
GeneID:107777338	1.34	0.69	0.58	0.15	0.03	0	-3.3976	2.45166e-05	0.000217137
GeneID:107775438	5.12	6.81	4.47	1.73	1.94	2.19	-1.11169	1.21918e-05	0.000113922
novel.2484	68.67	74.74	70.7	10.22	11.9	16.45	-2.10168	5.11585e-52	8.83693e-50
GeneID:107817755	2.59	1.66	2.8	1.27	0.46	0.65	-1.1586	0.00915171	0.0433837
GeneID:107778311	8.32	6.97	5.54	1.95	2.17	2.2	-1.28988	0.000647204	0.00427393
GeneID:107801142	1.01	1.41	0.99	0.18	0.13	0.19	-2.36799	0.00335566	0.0182644
GeneID:107779998	1.82	0.5	0.43	0	0	0	-6.33114	8.12327e-06	7.80289e-05
GeneID:107815588	2.1	1.63	3.09	0.5	0.48	0.91	-1.4623	0.00360897	0.0194584
GeneID:107821124	4.58	3.65	4.03	1.17	1.67	1.74	-1.03361	0.00218211	0.0125744
GeneID:107780376	2.02	2.23	2.61	0.84	0.71	0.72	-1.1946	0.00464103	0.0242027
GeneID:107831558	3.19	2.75	2.3	0.34	0.59	0.74	-2.08639	0.000153597	0.00117117
GeneID:107816169	7.33	3.46	7.27	1.09	1.16	2.25	-1.5882	0.00027643	0.00199355
GeneID:107815217	3.44	3.46	1.72	0.6	0.68	0.95	-1.59636	3.12723e-07	3.73425e-06
GeneID:107788717	387.78	335.81	355.93	124.27	117.95	122.07	-1.12864	3.95749e-29	2.69019e-27
GeneID:107805110	2.32	2.68	2.37	0.46	0.68	0.64	-1.69089	4.00808e-07	4.71573e-06
GeneID:107820990	5.81	6.42	6.03	2.7	1.76	2.01	-1.11225	8.64871e-05	0.000692432
GeneID:107811924	1.74	2.12	2	0.39	0.88	0.53	-1.36409	0.000620448	0.00411803
GeneID:107828695	43.62	53.41	38.71	13.02	18.99	18.56	-1.02822	2.29677e-09	3.62475e-08
GeneID:107790111	7.87	7.78	7.03	2.14	2.12	2	-1.47238	7.56356e-09	1.11844e-07
GeneID:107792131	14.08	16.05	7.96	4.13	3.25	4.65	-1.0931	0.00348386	0.0188644
novel.24025	8.33	6.74	4.67	0.65	1.23	1.24	-2.28571	2.36871e-10	4.17454e-09
GeneID:107825659	24.61	26.11	20.33	5.7	5.23	6.98	-1.4222	7.4237e-14	1.83192e-12
GeneID:107815809	2.21	3.22	3.52	0.27	0.87	0.81	-1.81033	0.000456327	0.00312091
GeneID:107820282	2.48	2.83	2.11	0.51	0.56	0.88	-1.57303	0.000131111	0.00101187
novel.13701	5.32	3.72	11.32	2.35	2.49	1.73	-1.21674	0.000872222	0.00557309
GeneID:107767598	6.24	8.46	8.4	3.46	3.19	2.06	-1.00196	0.000212276	0.0015695
novel.14475	1.19	1.33	1.16	0.35	0.24	0.38	-1.53361	0.0020957	0.0121305
GeneID:107827590	161.32	147.05	139.57	31.04	33.31	32.24	-1.81098	3.74615e-56	7.15728e-54
GeneID:107827956	7.2	7.45	7.23	2.17	2.55	3.1	-1.11897	1.21624e-09	1.99175e-08
novel.13966	2.01	2.03	1.91	0.32	0.17	0.35	-2.40849	0.00078927	0.00510254
GeneID:107787145	17.9	15.34	17.5	3.6	7.18	7.73	-1.02009	0.000432765	0.00297387
GeneID:107770786	7.09	6.63	7.41	2.47	2.98	2.34	-1.03869	1.67162e-06	1.79279e-05
GeneID:107774647	28.17	31.19	25.99	9.88	9.24	11.3	-1.10791	1.11917e-14	2.9447e-13
GeneID:107793048	133.24	126.31	115.39	37.07	37.45	44.06	-1.29004	2.6571e-32	2.14092e-30
GeneID:107807693	9.22	6.64	13.16	2.17	4.19	3.95	-1.07008	0.001472	0.00885573
GeneID:107786847	1.67	1.02	1.24	0.18	0.45	0.52	-1.43099	0.00333881	0.0181864
GeneID:107769424	1.22	1.92	1.11	0.14	0.33	0.33	-2.05308	2.80946e-06	2.90978e-05
GeneID:107780186	11.71	10.89	10.85	2.39	2.93	3.76	-1.52534	9.73866e-23	4.46959e-21
novel.14061	69.4	72.97	62.28	10.35	11.35	11.12	-1.87414	0.000815502	0.00524724
GeneID:107824273	22.86	25.49	22.75	7.98	8.38	8.68	-1.1331	7.32386e-19	2.66528e-17
GeneID:107797215	0.66	0.77	0.33	0.15	0.25	0.1	-1.52874	0.00225404	0.0129489
GeneID:107824867	0.39	0.68	0.53	0.12	0.09	0.13	-1.90132	0.000281962	0.00202996
GeneID:107822990	2.79	3.96	3.12	1.02	0.67	0.93	-1.50022	0.000482396	0.00328228
GeneID:107812548	10.31	11.58	12.39	1.58	1.34	1.16	-2.84397	1.47394e-63	3.44186e-61
GeneID:107815363	29.15	28.04	29.54	8.61	9.29	8.55	-1.27827	3.98338e-11	7.59613e-10
novel.950	25.92	26.67	20.18	4.82	8.38	7.86	-1.10989	1.24981e-08	1.80369e-07
GeneID:107801242	5.49	5.34	6.06	1.45	1.61	2.18	-1.32003	3.0371e-09	4.72075e-08
GeneID:107806554	1.33	1.55	1.07	0.44	0.26	0.19	-1.75675	0.000447275	0.00306399
GeneID:107763030	373.51	386.6	360.07	88.27	89.97	106.51	-1.601	1.07935e-60	2.32656e-58
GeneID:107790002	1.94	0.92	0.63	0	0	0.13	-4.40839	0.000462203	0.00315895
novel.1917	11.01	9.71	12.56	2.57	3.66	3.68	-1.35449	9.71073e-09	1.41889e-07
novel.17689	3039.48	2730.88	2250.79	954.08	930.83	1019.98	-1.07323	8.17385e-20	3.15924e-18
GeneID:107771057	2.76	3.64	2.25	0.2	0.63	0.32	-2.49603	0.000311008	0.0022113
GeneID:107784354	1.99	2.55	2.07	0.83	0.4	0.49	-1.51156	0.0093798	0.0442982
GeneID:107816290	1935.48	1671.61	1278.28	185.22	217.2	246.62	-2.38804	2.34702e-58	4.75428e-56
GeneID:107811946	11.08	8.49	11.2	2.19	3.41	3.56	-1.27933	5.25693e-06	5.21649e-05
GeneID:107812271	0.74	0.95	0.93	0.11	0.08	0.39	-1.81464	0.00860344	0.0412225
novel.22627	1.95	2.85	4.17	0.83	0.98	0.2	-1.72359	0.00485129	0.0251691
novel.22238	3.1	4.77	1.59	0.32	0	0	-4.42718	0.0034816	0.0188542
GeneID:107785653	4.62	5.46	5.16	0.82	1.17	0.67	-2.12442	2.18715e-09	3.46148e-08
GeneID:107819951	18.17	18.42	15.54	5.97	5.52	5.38	-1.25625	5.26643e-18	1.82065e-16
novel.15925	1.8	2.21	1.06	0.07	0.66	0.3	-1.91934	0.00794623	0.0384977
GeneID:107781243	34.68	36	31.86	10.84	11.75	12.28	-1.18265	6.21952e-22	2.70204e-20
GeneID:107800058	1.42	1.35	1.2	0.25	0.57	0.42	-1.34578	0.000388511	0.00270105
GeneID:107759091	26.94	25.73	22.99	8.26	7.44	11.23	-1.09479	2.18127e-09	3.45435e-08
GeneID:107786400	0.85	0.8	0.63	0.34	0.17	0.25	-1.18912	0.00987893	0.0462487
novel.18849	2.14	2.57	2.74	0.2	0.58	1.11	-1.59082	0.00445861	0.0233572
GeneID:107820730	0.46	0.53	0.53	0.03	0.08	0.17	-2.09055	0.00714202	0.0351656
GeneID:107807583	15.21	12.67	9.8	1.2	1.1	1.41	-2.83117	2.75425e-11	5.3452e-10
GeneID:107762664	0.57	0.67	0.41	0.09	0	0.05	-3.19325	0.0061839	0.031048
GeneID:107829067	0.9	0.58	0.9	0.07	0.08	0.3	-2.04458	0.00536135	0.0274679
GeneID:107825812	3.73	3.98	3.62	1.34	1.34	1.47	-1.08367	0.000333199	0.0023548
GeneID:107791087	323.99	329.69	297.58	100.28	95.42	99.72	-1.31308	1.03425e-41	1.26618e-39
GeneID:107814872	27.5	31.27	22.48	7.27	8.21	9.03	-1.17823	3.38569e-05	0.000292416
GeneID:107784866	8.08	8	9.71	2.45	3.19	3.63	-1.11177	9.93861e-10	1.6452e-08
novel.22436	1.76	1.95	1.8	0.55	0.45	0.8	-1.2505	0.000181733	0.00136385
GeneID:107774251	0.75	0.13	0.11	0	0	0	-4.78087	0.00621352	0.0311751
GeneID:107802630	185.28	180.66	201.02	65.34	62.67	83.14	-1.05103	1.17671e-22	5.36152e-21
GeneID:107813331	12.07	11.78	11.72	3.14	1.89	2.57	-1.77909	1.49522e-07	1.87e-06
GeneID:107831882	3.91	2.9	3.38	1.25	0.83	1.02	-1.35085	3.13003e-05	0.000271934
GeneID:107770005	1.11	1.08	0.67	0.29	0.36	0.25	-1.31257	0.0039231	0.0209416
GeneID:107832707	6.12	4.33	6.83	0.47	0.69	1.6	-2.22398	3.74975e-06	3.80398e-05
GeneID:107790449	22.28	19.34	22.59	6.91	7.62	8.47	-1.09509	5.22913e-11	9.89318e-10
GeneID:107763258	3.21	2.05	3.14	0.59	0.9	1.12	-1.35102	0.000209739	0.00155323
novel.17278	4.29	5.1	5.43	0.57	1	1.19	-1.04577	0.00124428	0.00763601
GeneID:107783567	4547.55	4590.05	3843.91	1281.11	1253.91	1318.78	-1.33904	4.13045e-39	4.50943e-37
GeneID:107764229	12.71	12.17	14.92	3.8	3.95	4.42	-1.32446	3.84339e-13	8.89251e-12
GeneID:107803064	2.88	3.65	3.03	1.13	0.86	0.86	-1.34937	0.000426695	0.00293616
GeneID:107763332	0.7	0.12	0.1	0	0	0	-5.42562	0.00068916	0.00452022
GeneID:107802995	20.75	20.19	23.36	0.62	2.54	2.32	-3.16833	2.13103e-15	5.97482e-14
GeneID:107819488	52.66	48.44	41.57	14.27	13.8	15.61	-1.27235	4.84755e-20	1.90573e-18
GeneID:107770019	1.07	1.49	1.4	0.3	0.27	0.33	-1.80938	0.000244608	0.00178575
GeneID:107778492	286.67	264.12	240.34	47.37	59.05	51.86	-1.88718	6.38976e-52	1.09252e-49
GeneID:107796094	9.08	9.48	9.94	2.21	1.74	0.45	-2.17135	9.25779e-05	0.000736868
GeneID:107775540	1.43	0.55	0.35	0	0	0	-4.95097	0.00276779	0.0154995
GeneID:107784792	22.39	23.97	19.17	8.16	6.64	9.7	-1.00615	1.54094e-06	1.66183e-05
GeneID:107785510	63.36	63.3	56.91	22.71	24.03	23.62	-1.0017	1.57587e-18	5.60545e-17
GeneID:107767001	0.86	0.79	0.81	0.28	0.23	0.1	-1.59254	0.00342441	0.0185985
GeneID:107780560	0.26	0.2	0.27	0	0	0	-5.061	0.00141786	0.00857086
GeneID:107778550	3.46	3.66	3.69	0.94	1.03	1.63	-1.20644	0.000188221	0.00140543
GeneID:107784679	0.37	0.44	0.34	0.04	0.11	0.14	-1.85333	0.00910854	0.0432075
GeneID:107798258	40.47	39.67	36.4	14.32	14.54	15.57	-1.01988	5.10245e-19	1.87993e-17
GeneID:107795150	3.65	3.14	2.46	1.26	1.01	0.89	-1.14956	0.00444335	0.0232971
GeneID:107760531	3.06	4.25	3.6	0.1	0.85	0.97	-2.09692	0.000569346	0.00381168
GeneID:107790582	8.54	8.28	11.09	2.93	2.91	2.14	-1.51616	9.42452e-07	1.05309e-05
GeneID:107777703	17.25	19.62	10.67	4.51	3.39	3.21	-1.65701	2.26984e-07	2.75942e-06
GeneID:107775038	29.18	28.35	30.35	8.41	10.67	12.5	-1.10604	3.115e-16	9.38575e-15
GeneID:107823313	9.14	6.78	6.79	0.96	1.62	1.07	-2.27464	1.04455e-10	1.9103e-09
novel.13930	9.53	8.34	5.99	0.41	1.51	1.02	-2.64342	1.78941e-12	3.88533e-11
novel.9272	13.02	13.91	19.4	2.37	4.01	4.19	-1.74637	1.24262e-14	3.26439e-13
GeneID:107814617	2.41	2.75	2.39	0.52	1.06	1.09	-1.14479	0.000527365	0.00355732
GeneID:107770125	52.19	51.37	45.4	15.27	16.28	16.58	-1.22445	1.04668e-17	3.54794e-16
GeneID:107782754	2.37	2.87	2.53	1.03	0.52	0.85	-1.2996	0.000162494	0.00123286
GeneID:107766700	3.08	2.51	1.86	0.45	0.06	0.73	-2.19279	0.000152226	0.00116142
novel.22266	3.11	2.15	3.37	0.31	0.4	0.39	-2.78228	0.00136616	0.00830311
GeneID:107779281	2.21	2.71	2.58	0.65	1.01	1.02	-1.14258	5.06707e-09	7.64975e-08
GeneID:107784617	36.43	32.71	39.79	8.11	11.72	15.25	-1.22665	1.34146e-10	2.42865e-09
GeneID:107767927	1.05	1.62	0.74	0	0.09	0.19	-3.19593	0.00639609	0.0319323
GeneID:107767559	3.76	4	3.25	0.59	0.8	1.04	-1.76021	0.000395607	0.00274358
GeneID:107800119	1.04	1.38	1.06	0.31	0.41	0.5	-1.15481	0.00101861	0.00639087
GeneID:107788020	7.84	8.33	8.41	1.02	2.14	0.6	-2.26527	3.34779e-07	3.98065e-06
GeneID:107804820	1100.45	1072.93	1047.05	369.53	361.46	402.72	-1.1284	9.44943e-38	9.807e-36
GeneID:107792403	12.09	11.54	8.63	1.77	2.42	2.53	-1.88655	2.12306e-14	5.44407e-13
GeneID:107769132	1.62	1.06	1.72	0.41	0.48	0.46	-1.34637	4.57256e-05	0.000386065
GeneID:107761645	2.09	3.14	3.44	0.46	0.79	0.5	-1.88169	0.00164816	0.0097963
GeneID:107824711	2.11	0.82	0.7	0.22	0	0	-3.5866	0.00205161	0.0119105
GeneID:107771555	3.1	4.01	3.28	1.11	1.12	1.72	-1.02731	0.00423567	0.0223453
GeneID:107822560	18.51	20.16	17.06	6.86	7.6	6.89	-1.01317	3.61135e-13	8.37869e-12
GeneID:107786105	16.05	17.24	15.44	5.03	6.27	7.15	-1.01723	6.92124e-07	7.88215e-06
GeneID:107800547	3.66	2.43	4.16	1.16	1.02	1.17	-1.244	0.000490822	0.00333422
GeneID:107799387	466.11	490.91	422.3	130.03	130.33	133.4	-1.51586	6.00649e-53	1.082e-50
GeneID:107803053	2.01	2.08	1.51	0.55	0.71	0.45	-1.36469	7.61963e-05	0.000616599
GeneID:107771217	1.45	1.56	1.05	0.5	0.43	0.61	-1.08579	0.000324687	0.00229786
novel.22846	4.55	4.37	5.98	1.74	1.69	1.83	-1.10297	0.00071822	0.00469131
GeneID:107827515	1.13	1.73	1.18	0.24	0.36	0.55	-1.46621	0.00127935	0.00782928
GeneID:107770388	1.91	1.64	1.58	0.41	0.69	0.69	-1.15942	0.00100008	0.0062936
GeneID:107803932	42.44	42.06	44.91	11.48	13.12	12.94	-1.12787	5.12922e-15	1.38128e-13
GeneID:107770728	138.91	151.93	130.67	50.55	44.44	42.31	-1.02856	2.63005e-20	1.0495e-18
GeneID:107809910	6.63	6.66	5.64	2.03	1.53	2.15	-1.32576	1.98121e-05	0.000178193
GeneID:107810257	2.3	1.39	1.63	0.27	0.24	0.24	-2.42244	0.000143818	0.00110043
novel.1586	3.71	4.15	3.44	0.68	1.15	1.15	-1.55078	1.32973e-06	1.44766e-05
GeneID:107764271	9.46	7.64	6.1	1.08	1.41	1.74	-2.06641	1.72853e-06	1.85028e-05
GeneID:107760664	4.55	4.31	3.79	1.37	1.23	1.42	-1.27445	9.10213e-09	1.33499e-07
GeneID:107802556	35.16	39.73	37.83	8.88	12.52	13.67	-1.28989	1.35027e-15	3.85872e-14
GeneID:107805666	1.85	1.72	2.19	0.17	0.47	0.38	-2.0915	0.00396286	0.021107
GeneID:107782018	3.15	2.83	2.39	1.04	0.7	0.78	-1.32483	0.00440939	0.0231418
GeneID:107822152	20.81	23.92	17.27	7.15	5.72	5.5	-1.33611	4.07144e-09	6.22301e-08
novel.25192	9.03	5.62	11.28	2.99	0.77	4.32	-1.27583	0.00326361	0.0178462
GeneID:107768365	22.84	21.68	18.88	3.51	5	5.4	-1.82432	1.58738e-29	1.10436e-27
GeneID:107777397	15.6	12.62	15.46	4.09	5.19	5.26	-1.22106	1.16826e-15	3.3576e-14
GeneID:107774255	23.42	19.05	23.38	4.42	8.13	6.27	-1.41364	5.99224e-12	1.24329e-10
GeneID:107780081	112.07	107.94	63.93	4.94	7.04	6.13	-3.2987	3.14963e-19	1.18291e-17
GeneID:107781565	4.95	3.71	4.48	1.96	0.89	1.47	-1.18749	0.00377833	0.020274
GeneID:107823519	41.73	31.38	30.31	5.9	7.57	10.35	-1.29879	9.73213e-07	1.08529e-05
GeneID:107787153	8.98	9.02	10.46	2.57	3.45	3.64	-1.18307	2.58774e-09	4.05855e-08
GeneID:107759737	297.51	325.26	313.52	106.21	114.15	121.46	-1.0834	2.3238e-36	2.27592e-34
GeneID:107793109	68.93	62	68.56	14.11	20.62	20.29	-1.46228	4.10474e-25	2.18857e-23
GeneID:107821611	22.93	23.4	23.48	6.56	10.3	8.72	-1.05137	7.22733e-09	1.07029e-07
GeneID:107761062	390.58	352.28	362.65	93.15	94.97	110.27	-1.49877	1.03369e-52	1.82941e-50
GeneID:107760899	7.08	8.48	6.66	1.64	2.16	2.75	-1.40806	7.19525e-11	1.34216e-09
novel.17277	22.48	23.42	20.82	1.84	1.65	2.71	-2.46454	7.88211e-17	2.50199e-15
GeneID:107771227	17.83	13.12	14.1	3.39	3.78	4.37	-1.49769	5.06215e-06	5.03609e-05
GeneID:107807218	3.99	4.33	5.05	1.24	1.42	2.11	-1.11764	6.85617e-07	7.81334e-06
GeneID:107812551	5.86	8.02	6.61	1.82	3.39	2.32	-1.07907	4.02561e-06	4.06828e-05
GeneID:107787868	12.11	13.18	11.2	3.52	4.13	3.99	-1.28309	5.55286e-17	1.77942e-15
GeneID:107817046	133.97	142.54	118.12	50.28	49.25	49.15	-1.03638	3.43237e-21	1.43315e-19
novel.25941	7	5.48	5.89	2.31	1.66	2.47	-1.23244	0.000426164	0.00293331
GeneID:107792008	3.73	4.62	2.82	1.42	1.12	1.54	-1.04302	0.0070963	0.0349644
GeneID:107825986	9.11	8.84	8.33	1.21	1.92	2.06	-1.91644	1.6144e-07	2.01009e-06
novel.362	56.58	60.42	44.13	15.43	14.13	15.43	-1.44614	1.05282e-20	4.28252e-19
GeneID:107809847	3.81	3.83	2.62	1	1.16	0.96	-1.34991	2.13247e-06	2.24869e-05
novel.24152	1.12	2.97	0.9	0	0	0.63	-2.59312	0.00844207	0.0405417
novel.8576	2.16	2.45	0.55	0	0	0.37	-3.40721	0.0045659	0.0238702
GeneID:107763178	1.43	1.32	0.98	0.37	0.46	0.38	-1.25876	0.00234342	0.0133983
GeneID:107760100	16.8	15.71	18.17	5.08	4.97	6.79	-1.19157	1.5494e-09	2.49921e-08
GeneID:107775210	53.59	50.51	96.68	3.99	16.02	18.04	-1.94874	0.00256654	0.0145046
GeneID:107769260	543.93	521.59	436.18	82.53	76.92	81.94	-2.21124	2.60883e-79	9.39907e-77
GeneID:107816497	4.91	3.92	4.38	1.2	1.58	1.54	-1.23772	4.72559e-06	4.71895e-05
GeneID:107827535	21.46	21.94	27.36	7.78	8.55	5.84	-1.1698	4.46298e-05	0.000377381
GeneID:107818642	4294.43	4111.09	3887.1	1215.46	1307.57	1346.47	-1.27069	1.31289e-46	1.89745e-44
novel.19298	7.14	6.06	11.06	2.1	2.47	2.96	-1.31218	9.54392e-09	1.39532e-07
GeneID:107814659	6.65	6.98	6.81	1.51	2.15	2	-1.4392	3.14688e-05	0.000273287
GeneID:107766087	14.01	11.83	13.24	2.33	2.23	3.47	-1.8801	9.51252e-14	2.33253e-12
GeneID:107827879	10.82	9.01	9.71	2.52	3.84	2.81	-1.23363	0.000537066	0.0036167
novel.6018	1.68	2.15	1.53	0	0	0	-8.24167	2.43899e-11	4.76637e-10
GeneID:107830529	6.94	5.53	5.92	1.56	1.96	2.17	-1.36632	5.39573e-05	0.000449027
GeneID:107830866	0.79	0.96	0.85	0.33	0.25	0.36	-1.08225	0.00869918	0.0415943
GeneID:107810812	1.54	0.91	1.28	0	0	0	-7.24917	1.69071e-08	2.40126e-07
GeneID:107765567	2.94	2.71	2.51	0.78	0.9	0.81	-1.35225	2.26879e-06	2.3811e-05
novel.12838	2.49	4.48	2.84	0.86	0.4	0.4	-2.14671	2.20831e-05	0.000197099
GeneID:107800287	118.79	116.5	100.29	32.22	31.19	35.69	-1.38373	2.13615e-33	1.82929e-31
GeneID:107825322	176.04	189.19	167.36	62.63	69.06	73.54	-1.00976	1.95465e-25	1.07047e-23
GeneID:107804476	2.81	3.78	3.59	0.77	0.54	1.14	-1.60281	9.08175e-05	0.000724114
novel.25844	39.95	42.48	41.46	9.53	10.7	14.49	-1.40365	3.31842e-14	8.4194e-13
GeneID:107776628	14.33	11.11	14.59	4.6	4.46	5.5	-1.0942	1.76369e-14	4.56901e-13
GeneID:107781513	1.18	0.86	1.15	0.2	0.39	0.29	-1.52077	3.12317e-05	0.000271509
GeneID:107788525	1.5	0.98	1.69	0.25	0.47	0.44	-1.47674	0.000656737	0.00432895
GeneID:107766401	6.7	6.05	8.68	2.16	2.95	2.3	-1.16728	6.70156e-09	9.96815e-08
GeneID:107828173	73.32	72.97	68.1	23.97	24.92	25.81	-1.15383	6.85802e-32	5.41333e-30
GeneID:107805007	0.37	0.47	0.2	0	0	0	-4.59672	0.00778971	0.0378303
novel.18061	2.14	1.85	4.46	0.5	0.21	1.19	-1.71968	0.0105733	0.0489451
novel.6147	658.17	90.51	54.58	0	0	0	-12.4796	1.53532e-09	2.47809e-08
GeneID:107818744	2.06	1.52	2.19	0.11	0.24	0.59	-2.24983	0.000269542	0.00194777
GeneID:107807539	39.64	37.27	34.62	12.08	13.31	14.67	-1.11434	1.19685e-22	5.44836e-21
GeneID:107824085	651.15	648.36	566.9	90.55	99.12	110.51	-2.07508	2.1015e-81	7.79395e-79
novel.19543	4.84	4.92	4.33	1.39	1.64	2.41	-1.01594	4.91519e-06	4.89955e-05
GeneID:107822599	150.4	149.25	130.63	33.55	24.56	43.71	-1.68626	2.59225e-26	1.49088e-24
novel.5595	6.03	7.79	5.73	1.11	1.33	1.45	-1.93779	1.80742e-09	2.89778e-08
GeneID:107822287	3.22	3.83	3.19	1.29	0.95	1.08	-1.24856	5.07923e-07	5.90031e-06
GeneID:107783258	41.02	44.77	42.66	13.78	13.51	15.39	-1.21397	1.08245e-26	6.38569e-25
GeneID:107808170	2.31	1.69	1.43	0	0.27	0.28	-2.85396	0.00739691	0.0362191
GeneID:107773687	578.9	621.36	572.45	166.04	174.82	183.82	-1.37464	2.05723e-54	3.84313e-52
GeneID:107800181	5.91	6.07	3.41	1.24	1.12	1.45	-1.64467	7.04187e-07	8.00507e-06
GeneID:107769796	1.37	1.43	1.33	0.51	0.56	0.49	-1.04007	3.34227e-05	0.000289012
GeneID:107815303	2.26	1.88	1.92	0.91	0.56	0.61	-1.14909	0.00619687	0.0311009
GeneID:107771183	0.58	1.08	0.7	0.11	0.24	0.12	-1.93722	0.00781705	0.0379411
GeneID:107788629	22.26	22.64	16.68	6.25	5.89	8	-1.24077	9.87372e-13	2.19296e-11
novel.12900	12.64	8.98	6.64	1.08	2.51	1.86	-1.92688	1.22247e-05	0.000114185
GeneID:107818662	1.12	0.74	0.39	0.33	0.15	0.05	-1.6969	0.00823914	0.0397108
GeneID:107828681	0.46	0.33	0.77	0.06	0	0	-4.14096	0.00773805	0.0376265
GeneID:107759448	4.49	3.85	3.78	0.87	1.03	1.4	-1.446	0.00427057	0.0225082
novel.19398	341.6	109.98	38.77	0	0	0	-9.79631	3.5701e-08	4.86419e-07
GeneID:107778527	5.92	7.46	7.82	1.25	1.37	1.82	-1.87806	2.83221e-14	7.20394e-13
GeneID:107821770	5.81	7.36	6.18	1.88	2.82	2.14	-1.10585	1.27498e-06	1.39317e-05
GeneID:107814429	106.42	104.81	103.02	30.86	32.88	38.17	-1.18151	1.31219e-34	1.19253e-32
GeneID:107803055	3.47	1.17	4.26	0.12	0.37	0.76	-2.40449	0.00212878	0.0122965
novel.15134	3.72	4.48	3.95	0.38	0.66	1.61	-1.76125	0.00344406	0.0186868
GeneID:107761040	6.14	7.26	5.13	1.76	1.8	1.75	-1.40379	2.90872e-06	3.00765e-05
GeneID:107798833	1.92	1.34	1.76	0.56	0.45	0.48	-1.36689	0.000170145	0.00128588
GeneID:107813017	4.1	2.88	4.32	1.1	0.93	1.48	-1.31473	9.18271e-07	1.02812e-05
GeneID:107767052	1670.45	1668.81	1378.5	471.11	434.67	418.96	-1.1908	5.46743e-25	2.88163e-23
novel.21622	48.93	55.35	44.58	15.44	15.08	17.43	-1.25908	2.3533e-22	1.05043e-20
GeneID:107831473	1.66	1.41	1.21	0.33	0.59	0.78	-1.00578	0.00100305	0.00630773
GeneID:107822084	2.13	1.14	1.92	0.61	0.48	0.6	-1.23565	0.000639108	0.00422878
GeneID:107776978	14.62	15.12	12.66	2.67	5.58	5.01	-1.25209	5.83828e-06	5.74589e-05
GeneID:107791580	14.44	14.88	16.7	3.91	4.61	4.99	-1.36383	2.18669e-09	3.46148e-08
GeneID:107763909	7.36	9.24	4.61	2.87	2.39	2.03	-1.108	0.002774	0.0155257
novel.11868	2.83	2.68	1.94	0.98	0.55	0.14	-1.7875	0.0015675	0.00936765
GeneID:107765264	0.61	0.63	0.71	0.28	0.27	0.17	-1.07513	0.00636018	0.0317782
novel.23601	4.21	3.93	6.51	1.62	1.77	2.16	-1.01823	0.000314386	0.00223028
novel.20023	1.05	1.21	1.09	0.06	0.06	0.19	-3.06513	0.000796316	0.00514282
GeneID:107777843	2.39	3.57	2.39	0.75	0.68	0.58	-1.68579	1.3239e-06	1.44225e-05
novel.13143	2.72	3.91	3.36	0.31	0.34	0.49	-2.75444	9.07647e-10	1.50942e-08
GeneID:107831889	1.14	0.61	0.88	0	0.07	0.07	-3.92626	0.002287	0.0131069
GeneID:107788996	2.05	2.45	1.6	0.58	0.2	0.59	-1.75836	0.000559022	0.00374904
GeneID:107797963	2.77	2.45	2.71	0.54	1.14	0.46	-1.51204	0.00027883	0.00200899
GeneID:107765532	1.88	0.95	1.36	0.47	0.25	0.47	-1.40312	0.000769285	0.00498997
GeneID:107795543	7.39	6.43	5.59	2.59	1.84	2.24	-1.10815	1.47165e-07	1.8419e-06
GeneID:107766512	11.22	10.32	10.86	1.74	3.33	3.47	-1.53814	3.26904e-09	5.05943e-08
novel.4647	4.06	4.02	3.28	0.44	0.58	1	-2.16031	2.19489e-09	3.47265e-08
novel.19109	17.46	22.14	23.35	6.01	7.41	8.43	-1.10906	1.71509e-07	2.12654e-06
novel.4687	0.54	0.73	1.11	0	0	0	-4.80538	0.00400662	0.0213175
GeneID:107768003	4.93	5.17	7.55	1.66	2.5	2.04	-1.12066	2.48683e-05	0.000219981
GeneID:107761850	3.43	3.73	3.33	1.27	1	1.62	-1.06436	8.45012e-06	8.09966e-05
GeneID:107773699	68.06	63.66	71.12	20.31	22.48	24.44	-1.22233	7.39672e-34	6.49971e-32
GeneID:107762821	0.67	0.84	0.76	0.32	0.19	0.14	-1.39966	0.00777566	0.0377875
novel.1026	26.03	25.76	21.34	6.23	9.23	8.99	-1.17538	5.58093e-09	8.37787e-08
novel.26853	77.93	84.46	57.72	32.08	28.53	20.85	-1.03538	5.20345e-09	7.83687e-08
novel.22313	6.54	6.92	5.71	1.72	1.37	2.52	-1.32539	0.00286221	0.015961
GeneID:107770769	6.29	5.47	5.6	1.06	1.81	1.53	-1.62829	7.79123e-17	2.4747e-15
GeneID:107779992	4.46	4.52	3.82	1.42	1.7	1.39	-1.11615	0.000472503	0.00321932
GeneID:107810774	7.53	19.27	5.82	2.99	3.32	1.52	-1.68627	0.00940165	0.044385
GeneID:107771894	1.24	1.21	1.12	0.33	0.18	0.18	-1.96692	0.00151927	0.00910642
novel.10254	120.65	126.22	129.83	23.19	28.81	40.59	-1.63728	3.13567e-29	2.15184e-27
novel.25544	2.24	1.86	1.24	0.19	0.2	0.1	-3.01954	0.00109609	0.00681361
GeneID:107776162	0.46	0.72	0.39	0.04	0.21	0.12	-1.76592	0.00629764	0.0315001
GeneID:107777430	70.49	64.71	40.71	3.11	3.34	4.98	-3.16711	3.19819e-06	3.2834e-05
GeneID:107822566	2.01	1.51	3.52	0.27	0.48	0.87	-1.71526	0.00948481	0.0447316
GeneID:107793461	7.67	6.94	5.67	1.06	1.59	0.66	-2.19386	1.60612e-07	2.00126e-06
GeneID:107797738	20.42	15.76	17.64	2.18	3.23	5.09	-1.88245	7.08482e-08	9.26982e-07
GeneID:107771985	54.33	48.74	39.87	9.12	5.37	10.89	-2.03011	7.25069e-17	2.30737e-15
GeneID:107809053	54.19	54.62	43.69	14.46	7.5	11.16	-1.69234	2.56182e-15	7.1154e-14
novel.14344	639.11	670.06	589.09	226.68	244.5	161.02	-1.053	3.40471e-13	7.92845e-12
novel.2245	3.15	3.28	2.85	0.25	0.75	0.48	-2.25724	1.08661e-05	0.000102368
GeneID:107766567	23.19	21.51	19.27	7.16	8.47	7.19	-1.0804	2.49924e-08	3.47545e-07
GeneID:107825744	44.9	38.44	61.29	4.85	6.9	7.68	-2.47256	8.1774e-33	6.81752e-31
GeneID:107827606	4.35	4.23	3.81	0.77	1.53	1.24	-1.38108	0.00350571	0.0189746
GeneID:107806460	27.26	31.73	26.9	9.9	10.21	12.4	-1.01428	4.15752e-12	8.73027e-11
GeneID:107830577	156.34	169.21	155.8	31.48	44.55	41.15	-1.62362	1.50575e-36	1.48627e-34
GeneID:107776510	0.72	0.19	0.11	0	0	0	-4.87413	0.00429029	0.0225963
GeneID:107810129	3.1	2.96	3.18	0.95	1.11	1.29	-1.09382	8.67623e-05	0.000694415
GeneID:107768770	10.19	12.88	11.06	2.61	3.46	5.38	-1.17978	1.04999e-05	9.91211e-05
GeneID:107782707	7.62	7.8	10.47	2.17	2.34	3.61	-1.27253	6.96219e-06	6.76229e-05
GeneID:107787858	38.86	41.39	37.26	8.4	7.9	8.48	-1.84004	7.42027e-31	5.56951e-29
GeneID:107816379	12.8	12.44	13.17	3.86	3.89	5.27	-1.22042	1.13067e-15	3.25327e-14
GeneID:107829256	2.62	3.21	3.22	1.07	0.92	0.39	-1.50821	0.00239687	0.0136605
GeneID:107770399	1.45	1.14	1.05	0	0.24	0.24	-2.55723	0.00565538	0.0287552
GeneID:107784332	4.74	5.17	5.88	1.14	1.37	2	-1.41005	5.01252e-05	0.000419838
novel.5507	9.35	15.18	18.29	0	0	0	-6.05312	1.70414e-05	0.00015479
GeneID:107784426	0.56	0.99	0.17	0	0	0	-4.99008	0.00256192	0.0144866
novel.4670	15.57	12.11	10.34	2.69	3.93	4.38	-1.38709	3.32527e-07	3.95574e-06
GeneID:107798911	1.96	2.48	2.14	0.75	0.61	0.63	-1.34181	9.1886e-06	8.75617e-05
GeneID:107793273	2.46	2.28	2.45	0.64	0.58	0.64	-1.56959	5.81046e-06	5.72074e-05
GeneID:107778497	10.78	9.86	12.02	2.95	2.66	4.34	-1.32297	1.2922e-08	1.86009e-07
novel.16214	2.25	1.75	1.57	0.16	0.17	0.25	-2.87511	0.000301528	0.00215421
GeneID:107811604	93.48	93.35	97.66	28.44	37.17	40.39	-1.04809	5.13273e-20	2.01471e-18
GeneID:107822819	0.47	0.8	0.76	0.09	0.13	0.32	-1.53578	0.00462255	0.0241214
novel.16319	242.85	270.62	219.45	26.08	38.69	52.46	-2.27322	9.43108e-16	2.73193e-14
GeneID:107775609	4.16	4.44	5.4	0.24	1.99	1.57	-1.47968	0.00244102	0.013873
GeneID:107771681	0.79	0.62	0.19	0.12	0	0	-3.27479	0.00745547	0.0364775
GeneID:107774703	129.71	134.09	123.26	39.2	39.8	46.4	-1.24413	2.42029e-32	1.95636e-30
GeneID:107787555	0.36	0.08	0.06	0	0	0	-4.9571	0.00337903	0.0183777
GeneID:107796152	3.78	1.01	1.1	0.2	0	0	-4.37717	0.000675855	0.00444278
novel.17162	1.38	2.11	0.55	0	0.12	0	-4.54523	0.00241256	0.0137391
GeneID:107792542	1.68	2.27	1.63	0.72	0.57	0.48	-1.29472	0.000560231	0.00375565
GeneID:107798415	2.4	1.98	1.98	0.13	0.07	1.02	-2.01877	0.0028695	0.0159946
GeneID:107781398	0.94	1.36	1.58	0.33	0.34	0.4	-1.51967	0.00102336	0.00641397
GeneID:107761978	52.11	48.81	55.13	17.37	18.66	19.12	-1.09947	1.40055e-18	5.01011e-17
GeneID:107821562	3.9	4.32	3.7	1.13	1.24	1.49	-1.26812	1.61463e-05	0.000147376
GeneID:107827684	6.59	8.34	6.26	1.82	2	2.91	-1.27839	3.17957e-07	3.79315e-06
GeneID:107791922	25.88	24.18	26.22	2.22	6.23	5.62	-1.97624	6.59707e-11	1.23699e-09
GeneID:107827613	1.77	1.91	2.33	0.57	0.63	0.57	-1.3777	0.00011311	0.000883594
GeneID:107769978	3.12	2.58	3.02	0.43	0.65	0.89	-1.76411	8.32758e-05	0.000669058
GeneID:107810159	47.84	47.66	43.49	14.41	15.31	16.59	-1.21594	1.75244e-27	1.08456e-25
GeneID:107823471	1.74	2.15	3.56	0.63	0.6	0.44	-1.79658	0.00143447	0.0086578
GeneID:107786396	16.1	14.05	11.79	4.31	3.95	4.63	-1.32237	3.3206e-12	7.04025e-11
GeneID:107818126	0.39	0.12	0.34	0	0	0	-5.76699	8.78461e-05	0.000702421
novel.5560	4.47	6.02	5.67	1.12	1.34	1.81	-1.55525	9.16998e-12	1.87485e-10
GeneID:107787493	36.88	34.15	33.74	7.02	11.21	11.9	-1.36528	5.48257e-11	1.03571e-09
GeneID:107792558	0.34	0.2	0.14	0	0	0	-5.23319	0.000801999	0.00517554
GeneID:107779843	19.02	16.62	17.31	4.82	4.81	5.15	-1.43931	1.04429e-22	4.77542e-21
novel.18951	0.54	1.17	1.28	0.06	0.27	0.47	-1.59651	0.00314839	0.0172968
GeneID:107803515	1.95	1.57	1.5	0.65	0.65	0.62	-1.01235	0.00837016	0.040227
GeneID:107769336	105.12	99.29	120.71	20.13	28.13	33.69	-1.54853	1.88039e-22	8.43817e-21
novel.27645	2.52	1.96	1.96	0	0	0.13	-5.07804	0.000256189	0.00186168
novel.23116	24.15	23.88	24.15	6.48	7.66	7.97	-1.31023	5.47279e-15	1.46831e-13
GeneID:107778400	2.36	2.25	1.23	0.09	0.6	0.41	-2.01065	0.00900294	0.0428032
GeneID:107789429	5.38	6.05	9.63	1.51	2.59	3.15	-1.16347	0.000126176	0.000976252
GeneID:107781240	1.54	1.24	1.69	0.29	0.43	0.16	-1.94293	0.00143047	0.0086357
GeneID:107793469	0.38	0.19	0.24	0.06	0.12	0.08	-1.38156	0.00259977	0.0146677
GeneID:107760584	67.74	68.51	66.78	23.6	23.61	21.41	-1.17354	8.01901e-24	3.93837e-22
GeneID:107803259	1.28	0.82	0.99	0.15	0.11	0.16	-2.5066	0.00151827	0.00910258
GeneID:107811126	1.86	1.46	0.62	0	0	0	-4.8776	0.00320081	0.0175485
novel.8880	2.8	3	2.46	0.67	0.79	0.66	-1.55773	0.000791906	0.00511761
GeneID:107770378	29.15	27.47	22.91	8.28	7.76	8.6	-1.30876	2.87455e-17	9.45171e-16
GeneID:107781117	10.53	9.87	8.35	2.29	1.62	2.04	-1.87364	2.31103e-12	4.96447e-11
GeneID:107789111	2.28	2.92	1.63	0.59	0.74	0.37	-1.56809	0.00239042	0.0136284
GeneID:107810151	1.01	0.7	0.52	0.17	0	0	-3.29077	0.00549414	0.0280485
GeneID:107794893	33.58	25.16	30.62	5.81	5.67	8.74	-1.68314	2.01755e-11	3.97952e-10
GeneID:107803137	0.22	0.29	0.2	0.01	0.04	0.06	-2.31885	0.00308778	0.0170231
GeneID:107760728	497.68	463.99	403.47	154.68	156.02	150.76	-1.19469	8.84868e-29	5.91934e-27
GeneID:107771734	3.72	4.32	4.01	0.95	1.73	1.48	-1.14263	0.00184733	0.010846
GeneID:107759229	3.66	5.05	8.32	2.05	1.94	1.97	-1.07646	0.0105144	0.0487171
novel.9187	65.5	68.72	77.61	22.48	27.92	26.66	-1.08898	2.56746e-27	1.5659e-25
novel.842	7.97	9.62	6.83	2.2	2.43	3.23	-1.2094	0.000471111	0.0032107
GeneID:107765596	56.02	63.41	55.68	23.16	21.77	21.94	-1.01144	5.80359e-19	2.12892e-17
GeneID:107785533	1.37	1.65	1.94	0.33	0.21	0.35	-2.06555	0.0020518	0.0119105
GeneID:107761445	10.9	9.69	9.33	1.46	3.29	2.78	-1.56595	6.24617e-06	6.1163e-05
GeneID:107774489	2.19	2.94	2.15	0.55	0.83	1.33	-1.07594	0.00167691	0.0099496
GeneID:107820428	19.86	20.81	19.21	5.68	7.05	7.45	-1.16239	4.417e-09	6.72063e-08
GeneID:107802270	4.95	4.62	4.3	1.17	1.89	1.65	-1.19638	1.09303e-07	1.39151e-06
GeneID:107784841	123.89	121.84	108.2	40.74	43.49	48.26	-1.01275	2.11917e-18	7.46431e-17
GeneID:107772947	10.56	13.18	12.98	4.85	3.31	3.08	-1.24395	1.12032e-08	1.62659e-07
GeneID:107789508	4.63	3.92	3.96	1.45	1.43	1.59	-1.09123	0.000411544	0.00284315
GeneID:107820886	8.26	5.43	3.97	1.83	0.74	1.97	-1.60083	0.0108321	0.0499916
GeneID:107814129	231.83	229.01	231.92	61.39	68.2	76	-1.3759	5.52481e-49	8.49592e-47
GeneID:107780801	18.16	19.42	15.98	5.75	4.46	5.2	-1.39731	1.24356e-18	4.45481e-17
GeneID:107807697	14.14	14.35	12.55	4.7	5.09	4.86	-1.11896	2.36365e-15	6.57949e-14
GeneID:107763133	1.51	1.55	2.71	0.35	0.85	0.7	-1.25728	0.00195613	0.0114156
GeneID:107820117	15.47	16.11	14.09	5.48	5.3	5.82	-1.05741	1.96015e-07	2.41082e-06
GeneID:107814057	19.53	14.51	28.16	3.64	7.18	7.32	-1.33953	3.70701e-06	3.76516e-05
GeneID:107828384	2.49	2.54	3.28	0.63	1.04	0.8	-1.36536	0.000550638	0.00369772
GeneID:107808119	24.18	22.13	26.77	7.7	9.95	8.67	-1.09044	1.0667e-13	2.6017e-12
novel.17263	9.22	10.8	8.33	0.81	1.18	0.82	-2.84864	1.46729e-19	5.56875e-18
GeneID:107794064	2.94	2.75	2.02	0.62	1.09	1.21	-1.05176	0.00520716	0.0267567
novel.7287	14.74	14.85	11.21	2.58	2.45	2.01	-1.97738	7.0004e-05	0.000570057
GeneID:107813708	244.2	246.72	225.35	67.37	68.74	72.68	-1.38722	2.85114e-45	3.93996e-43
GeneID:107801946	1.59	1.82	2.3	0.49	1.03	0.6	-1.07881	0.005885	0.0297578
GeneID:107779532	14.7	17.74	17.76	4.37	5.57	6.22	-1.2579	4.3113e-14	1.0862e-12
novel.1916	7	6.29	6.26	1.39	1.57	1.92	-1.62238	3.73538e-10	6.459e-09
GeneID:107798994	0.69	0.5	0.73	0.22	0.06	0.09	-1.95298	0.000718545	0.00469222
novel.8351	2.79	2.59	2.38	0.56	0.7	0.67	-1.63677	5.13464e-07	5.95781e-06
GeneID:107824481	5.09	4.32	4.13	0.9	0.73	0.86	-2.05827	2.63976e-10	4.63837e-09
GeneID:107827412	3.83	3.72	2.92	0.6	0.6	0.21	-2.38484	0.00576631	0.0292397
novel.15433	3.76	2.19	2.04	0.2	0.6	0.44	-2.30809	1.00564e-05	9.52995e-05
novel.19958	11.11	13.56	8.11	1.24	0	2.3	-2.72596	5.87655e-05	0.000486153
GeneID:107829106	4.51	6.55	3.08	0.43	0.43	0.26	-3.27786	1.97461e-12	4.26358e-11
GeneID:107817741	165.84	152.11	164.74	19.92	37.74	40.52	-1.86641	1.11016e-25	6.15087e-24
novel.5841	7.84	6.63	5.16	1.64	1.63	1.7	-1.61205	4.00891e-08	5.41815e-07
novel.11144	10.49	11.77	11.71	1.37	2.64	3.21	-1.0696	1.55685e-05	0.000142593
GeneID:107814213	2.21	2.25	1.31	0.84	0.39	0.74	-1.17854	0.000365593	0.00255971
GeneID:107771520	6.24	4.63	5.88	0.66	0.8	1.4	-2.12248	1.57648e-05	0.000144234
GeneID:107814150	11.4	11.84	12.36	4.09	3.02	2.85	-1.39892	2.26008e-06	2.37361e-05
GeneID:107783324	490.41	484.41	369.27	61.83	70.74	72.67	-2.20067	7.62239e-53	1.35854e-50
GeneID:107819003	25.38	26.87	25.49	8.43	10.61	9.55	-1.00227	3.29683e-07	3.92376e-06
GeneID:107799324	3.56	3.21	3.13	0.98	1.04	1.77	-1.01789	0.000853586	0.00547183
GeneID:107771953	3.34	3.49	2.82	1.05	1.13	1.04	-1.21492	1.54545e-05	0.000141677
GeneID:107814400	142.48	141.09	128.72	39.6	43.34	48.27	-1.28574	1.18334e-36	1.17262e-34
GeneID:107795368	3.9	3.61	3.33	0.99	1.27	1.02	-1.32943	0.000572468	0.00383055
GeneID:107801678	64.17	70.48	77.3	6.56	35.54	34.32	-1.47325	2.26082e-15	6.31415e-14
GeneID:107806326	53.7	51.18	50.01	17.6	17.28	19.16	-1.136	1.44906e-22	6.5787e-21
GeneID:107815824	5.35	5.83	4.92	1.35	1.75	2.01	-1.2953	1.59671e-11	3.1795e-10
GeneID:107797479	104.43	107.56	90.48	23.89	25.54	28.38	-1.55463	3.87175e-39	4.24537e-37
GeneID:107829843	1.99	1.52	2.11	0.22	0.52	0.99	-1.36263	0.00345449	0.0187316
GeneID:107777903	3.13	3.71	4.12	0.66	0.81	0.88	-1.84371	2.56922e-09	4.03076e-08
novel.19021	407.66	412.47	362.7	135.58	125.5	126.66	-1.23343	6.71153e-33	5.65147e-31
novel.1284	1.82	2.18	1.59	0.16	0.41	0.76	-1.70066	0.00310574	0.0171075
GeneID:107781357	0.4	0.06	0.05	0	0.01	0.06	-2.79257	0.00778269	0.037809
GeneID:107773497	0.77	1.8	0.92	0.03	0.09	0.03	-4.22839	2.32285e-07	2.81776e-06
GeneID:107781430	9.44	3.49	3.04	0.51	0.11	0.18	-3.98194	3.69965e-06	3.75844e-05
GeneID:107772238	79.23	81.1	75.06	19.2	20.1	23	-1.52452	5.81835e-41	6.84084e-39
GeneID:107764602	5.83	3.39	5.86	1.25	1.78	1.71	-1.24656	0.00216534	0.0124834
GeneID:107787772	7.61	8.37	8.42	2.24	4.03	2.04	-1.13431	0.000579369	0.00387057
GeneID:107816373	424.69	401.19	437.11	68.45	76.82	89.95	-1.99122	9.45062e-78	3.26493e-75
GeneID:107792079	1.8	1.77	2.36	0.8	0.46	0.67	-1.21533	0.00404262	0.0214818
novel.2586	3.35	4.13	3.64	0	0	0	-7.82123	3.72102e-10	6.43768e-09
GeneID:107823780	2.54	2.09	1.88	0.52	0	0.19	-2.74242	0.000624961	0.00414496
GeneID:107780242	75.64	65.98	67.09	21.73	23.52	29.96	-1.05696	3.44525e-13	8.01544e-12
GeneID:107787116	17.82	16.17	18.22	1.26	3.23	7.32	-1.72274	2.12621e-05	0.00019025
GeneID:107803151	0.53	0.47	0.44	0	0.15	0.04	-2.61412	0.0096592	0.0453652
GeneID:107802253	90.28	85.39	148.02	19.78	90.91	77.04	-1.02912	0.00884643	0.0421624
GeneID:107764000	0.39	0.24	0.16	0	0	0	-4.94504	0.00243331	0.0138412
GeneID:107768650	10.55	10.07	8.89	2.49	2.51	4.25	-1.30372	1.62142e-08	2.30764e-07
GeneID:107782448	1.02	1.92	1.66	0.6	0.26	0.54	-1.285	0.00776525	0.0377442
GeneID:107791991	11.47	12.83	11.79	2.22	2.82	3.19	-1.73493	4.59134e-12	9.61323e-11
novel.7451	2.99	3.47	3.67	0.31	0.54	0.99	-2.04547	0.000671944	0.00441995
GeneID:107814282	24.56	25.37	24.39	8.76	7.72	9.74	-1.12021	4.86182e-15	1.31347e-13
novel.19526	5.87	4.68	3.34	1.49	1.56	2.01	-1.06732	0.00237707	0.0135646
novel.1620	1.18	0	0	0	0	0	-21.8253	2.3571e-08	3.29062e-07
GeneID:107812925	3.87	5.15	4.65	1.46	1.4	1.95	-1.30027	1.3017e-08	1.87322e-07
GeneID:107775109	2.53	1.03	0.52	0.14	0	0	-4.21704	0.00730916	0.0358625
GeneID:107777450	7.81	5.58	6.53	1.69	2.06	2.33	-1.34094	6.89701e-09	1.02438e-07
GeneID:107817937	749.07	693.16	716.48	114.25	147.83	176.53	-1.73941	9.74699e-45	1.31804e-42
GeneID:107802702	45.65	40.49	36.08	10.6	12.06	9.33	-1.48792	9.58225e-14	2.34735e-12
novel.15534	5.72	5.48	5.61	0.93	1.24	1.41	-1.77556	0.000383507	0.00267178
GeneID:107770869	1.99	1.86	0.96	0.51	0.11	0.33	-1.92978	0.00241471	0.0137498
GeneID:107770629	20.25	24.15	23.45	5.21	4.71	8.07	-1.51523	2.80659e-13	6.57508e-12
novel.880	7.48	3.84	4.8	0.53	0.45	1.36	-2.39624	4.44763e-08	5.97745e-07
GeneID:107767896	2.88	2.48	2.92	0.48	0.76	0.88	-1.58222	0.000337145	0.00238002
novel.19284	1.97	3.09	1.84	0.9	0.6	0.6	-1.30986	0.00490266	0.0254043
GeneID:107772799	3.53	5.5	2.8	0	0.74	0	-3.4204	0.00314606	0.0172858
GeneID:107807664	1.46	2	2.75	0.73	0.93	0.51	-1.12129	0.00822181	0.0396387
GeneID:107802198	2.2	1.53	2.05	0.29	0.91	0.73	-1.23474	0.00778562	0.0378177
GeneID:107803518	6.94	7.91	6.17	1.53	1.49	3.45	-1.46553	0.00184524	0.0108374
GeneID:107820480	2.67	2.26	3.61	0.98	0.8	1.46	-1.01408	0.00223852	0.0128637
GeneID:107781715	6.62	7.93	8.71	3.05	2.09	3.55	-1.03493	5.2058e-06	5.16982e-05
GeneID:107770162	1.7	0.76	1.35	0	0	0	-6.195	8.389e-06	8.04741e-05
GeneID:107763511	2.24	2.92	3.27	0.9	0.49	1.24	-1.28329	0.00167256	0.00992729
GeneID:107815847	64.06	56.22	56.92	14.91	13.83	16.42	-1.5939	9.84212e-39	1.06989e-36
GeneID:107811619	5.74	3.72	4.33	1.87	2.33	0.81	-1.06809	0.00220125	0.0126731
GeneID:107816417	38.11	32.31	46.02	2.25	5.65	9.96	-2.24825	4.76604e-05	0.000401125
GeneID:107771723	3.07	1.82	1.39	0.45	0.77	0.49	-1.47573	0.00977498	0.0458267
GeneID:107759925	24.24	24.16	24.1	9.41	9.1	8.86	-1.0302	3.14617e-17	1.03045e-15
novel.385	272.46	189.9	236.15	0	0	0	-6.53245	1.16165e-06	1.27848e-05
GeneID:107802660	28.24	24.46	25.51	8.34	8.56	9.98	-1.16986	3.53268e-19	1.31599e-17
GeneID:107780380	5.7	4.62	6.17	1.47	1.38	2.33	-1.25733	0.0011423	0.00706952
novel.11716	17.56	18.23	26.21	4.61	6.91	6.25	-1.3172	1.1917e-05	0.000111649
GeneID:107816705	0.82	1.29	0.82	0.17	0.16	0.35	-1.73648	0.00230019	0.0131735
GeneID:107813294	3.29	2.77	4.33	0.85	1.32	1.13	-1.27303	5.98192e-05	0.000493979
GeneID:107816630	7.79	7.19	10.18	2.65	2.82	3.51	-1.10976	6.72681e-08	8.82887e-07
GeneID:107784232	1.29	1.46	1.85	0.35	0.55	0.41	-1.44275	0.000291249	0.00208996
GeneID:107832263	35.83	32.08	23.35	3.21	4.79	6.01	-2.20493	6.5035e-12	1.34439e-10
novel.25710	21.12	40.88	11.11	2.06	2.49	1.78	-3.00327	0.000721839	0.00471177
GeneID:107805311	1.86	2.12	1.6	0.49	0.67	0.81	-1.12576	0.0102347	0.0476488
GeneID:107805861	5.49	5.12	5.14	1.89	1.57	2.45	-1.0245	0.000179293	0.00134754
GeneID:107808430	15.73	15.28	14.46	5.49	6.11	5.33	-1.05464	6.65777e-14	1.64856e-12
novel.15947	2.2	1.89	1.73	0.17	0.3	0.37	-2.41192	8.16258e-05	0.000656744
novel.25292	2.49	1.53	1.86	0.15	0.31	0	-3.16366	0.00680546	0.0337357
GeneID:107819243	773.53	699.77	669.98	207	240.98	275.54	-1.08357	3.18274e-20	1.26306e-18
GeneID:107829157	0.4	0.57	0.24	0.05	0.17	0.12	-1.53972	0.00379123	0.0203259
GeneID:107780915	89.13	87.37	89.11	18.98	21.02	23.73	-1.63686	1.58815e-35	1.50009e-33
GeneID:107813907	9.35	5.61	7.03	0.96	1.53	1.64	-2.00791	9.83195e-08	1.26187e-06
novel.7467	5.62	0.98	1.66	0.23	0	0	-4.55395	0.00282226	0.0157661
GeneID:107796652	1.02	1.58	1.44	0.46	0.42	0.54	-1.12463	0.00962289	0.0452474
GeneID:107765939	1.37	1.87	1.58	0.28	0.8	0.74	-1.0508	0.0089871	0.04274
GeneID:107785519	14.95	14.78	13.94	4.75	5.71	5.7	-1.06537	3.52146e-13	8.1852e-12
GeneID:107831502	0.35	0.08	0.11	0	0	0	-4.57246	0.00981546	0.0460071
GeneID:107793006	4.04	4.61	3.02	1.47	1.3	1.24	-1.13538	0.00418607	0.0221299
GeneID:107799364	4.32	3.04	2.64	0.65	0.46	0.51	-2.02874	7.76489e-06	7.48716e-05
GeneID:107807245	15.24	16.05	10.91	2.85	3.73	3.84	-1.65761	4.0084e-19	1.4899e-17
GeneID:107816819	7.74	8.04	7.3	2.31	2.8	2.44	-1.23117	3.27726e-09	5.06905e-08
GeneID:107779616	1.24	0.13	0.44	0.03	0.03	0	-4.41672	0.000700982	0.00459001
GeneID:107832459	0.49	0.84	0.35	0.11	0.08	0.04	-2.43526	0.00965962	0.0453652
GeneID:107791809	1.77	1.61	1.48	0.28	0.47	0.31	-1.8296	9.91034e-07	1.10273e-05
novel.25889	44.22	42.46	43.1	9.91	11.43	14.01	-1.4829	4.64149e-24	2.31108e-22
GeneID:107807417	70.16	68.6	70.21	12.06	14.2	19.39	-1.77256	1.07098e-27	6.68556e-26
GeneID:107823550	1.61	1.46	1.66	0.37	0.72	0.43	-1.30068	0.000578134	0.00386334
novel.21021	6.18	7.76	4.3	0.55	0.37	0.96	-2.88575	1.56034e-10	2.80177e-09
GeneID:107801718	5.66	5.32	4.86	1.98	1.98	1.28	-1.19418	0.000146074	0.00111617
GeneID:107826963	2.93	2.17	2.49	0.44	0.89	0.59	-1.54665	0.00116643	0.00720292
GeneID:107827945	3.58	4.11	3.08	0.6	0.36	1.08	-2.00233	3.15814e-05	0.000274219
GeneID:107810302	146.83	161.56	121.78	39.75	44.12	38.31	-1.4079	2.17741e-25	1.18731e-23
novel.2703	1.59	2.36	3.04	0.47	0.94	0.58	-1.40417	0.00895257	0.0426039
GeneID:107823460	2.37	2.44	2.8	0.22	0.2	0.32	-2.9863	4.45653e-10	7.64828e-09
GeneID:107775918	12.09	6.94	5.43	0.75	0.26	0.13	-3.94679	1.24322e-09	2.03304e-08
novel.27434	5.36	5.71	2.92	0.47	0.3	0.41	-3.14827	2.27164e-07	2.76095e-06
GeneID:107832768	2.48	1.64	1.99	0.56	0.73	0.3	-1.54515	0.00361527	0.0194903
GeneID:107798391	5.07	4.14	3.5	1.33	0.91	1.37	-1.40946	0.000537417	0.0036181
GeneID:107798076	65.19	55.06	41.64	21.81	16.51	17.14	-1.14271	2.20554e-09	3.4873e-08
GeneID:107815714	43.33	41.68	34.35	15.37	12.44	14.13	-1.12191	1.21877e-13	2.95974e-12
novel.11689	2.41	1.53	3.17	0.36	0.25	0.51	-2.21676	0.00515011	0.0264933
GeneID:107773050	8.56	10.12	5.37	0.63	0.55	0.88	-3.02068	0.00012706	0.000982794
GeneID:107782770	323.88	291.91	337.95	72.93	133.92	125.06	-1.06046	1.02423e-10	1.87586e-09
GeneID:107790661	0.2	0.23	0.17	0.05	0.09	0.07	-1.16197	0.00740151	0.0362381
GeneID:107821244	0.67	0.28	0.28	0	0	0	-5.34894	0.000524225	0.00353826
GeneID:107764708	14.27	13.84	16.27	3.92	2.99	5.13	-1.42314	2.10276e-07	2.57243e-06
GeneID:107798525	1.09	0.88	1.1	0.27	0.38	0.46	-1.1054	0.00606281	0.0305131
GeneID:107764361	0.7	0.5	0.42	0	0	0	-4.57113	0.00813588	0.039292
GeneID:107779373	31.36	28.17	25.9	4.23	5.89	6.59	-1.93165	4.91435e-16	1.46153e-14
GeneID:107803115	8365.29	7966.79	6376.98	2025.95	2000.69	2090.42	-1.48199	1.49491e-38	1.61115e-36
GeneID:107770144	1.63	2.28	2.23	0.49	0.63	0.65	-1.44006	9.71195e-05	0.000768892
GeneID:107805466	4.11	4.96	4.21	1.2	1.58	1.83	-1.14049	0.00139973	0.00847751
GeneID:107801631	164.2	158.96	168.46	36.91	46.74	52.67	-1.43795	4.16386e-32	3.32312e-30
GeneID:107821754	17.62	17.33	18.71	5.46	5.63	7.57	-1.10715	4.65771e-07	5.43819e-06
GeneID:107760805	25.01	28.71	23.54	7.04	7.81	8.25	-1.36922	1.58125e-22	7.14028e-21
GeneID:107790462	58.66	63.51	56.05	11.56	13.17	14.27	-1.75404	8.06252e-26	4.52857e-24
GeneID:107772013	19.43	18.17	17.37	5.92	6.22	6.5	-1.12963	9.10139e-08	1.17288e-06
GeneID:107761890	1.08	0.93	1.13	0.37	0.5	0.34	-1.02727	0.00856646	0.0410804
GeneID:107769747	26.76	28.66	24.24	7.61	7.57	9.25	-1.03703	3.1808e-09	4.93346e-08
novel.10986	2.38	2.53	2.61	0.6	0.63	0.61	-1.67144	1.69579e-12	3.69477e-11
GeneID:107814059	7.42	8.46	7.86	2.52	2.56	2.77	-1.2225	3.0007e-11	5.7945e-10
GeneID:107773592	4.92	5.19	3.61	0.78	1.42	1.75	-1.41234	0.000200764	0.00149136
GeneID:107763022	1.26	0.76	0.48	0	0	0	-4.5846	0.00824211	0.0397176
GeneID:107764072	27.34	38.81	25.94	8.23	9.1	11.16	-1.29822	2.83501e-11	5.49348e-10
GeneID:107824609	0.98	0.71	0.77	0.08	0.11	0.09	-2.74763	4.64555e-06	4.64454e-05
novel.17457	4.65	5.3	3.56	1.33	1.51	1.64	-1.20156	0.000472208	0.00321774
novel.20878	28.79	35.76	25.35	10.38	10.06	10.16	-1.06441	1.55951e-09	2.5139e-08
GeneID:107776317	1.28	1.95	1.98	0.35	0.3	0.6	-1.657	0.00963255	0.0452717
GeneID:107826301	2.61	2.16	1.98	1.18	0.77	0.84	-1.08897	5.70715e-06	5.62561e-05
novel.14784	35.34	26.65	29.07	7.47	11.95	9.56	-1.14766	1.73115e-05	0.00015713
GeneID:107801023	37.25	36.95	32	8.82	9.37	10	-1.53028	1.02581e-26	6.05862e-25
GeneID:107764790	2.53	3.83	2.28	0.78	0.93	0.66	-1.44242	0.00807101	0.0390198
GeneID:107832234	17.13	17.72	15.42	6.67	5.95	6.34	-1.04036	4.12148e-15	1.12127e-13
GeneID:107766834	5.31	5.28	4.11	1.53	2.32	1.62	-1.04795	0.00181231	0.0106602
GeneID:107766930	6.11	7.46	6.33	2.28	1.46	1.5	-1.45971	0.00147941	0.00889288
GeneID:107779199	3.66	3.73	4.06	0.84	1.06	1.75	-1.30907	1.0426e-05	9.84812e-05
GeneID:107807223	0.77	1.57	11.85	0	0	0	-5.02097	0.00378636	0.0203084
GeneID:107820691	5.66	5.45	6.07	1.59	2.11	1.71	-1.21441	3.36773e-06	3.44065e-05
novel.3147	341.84	311.18	314.62	129.97	114.01	114.2	-1.01079	1.39678e-21	5.94532e-20
GeneID:107791441	0.33	13.26	0.52	0.04	0.08	0.04	-2.94581	0.00476455	0.0247726
GeneID:107816557	1.31	1.58	0.96	0.38	0.32	0.68	-1.11555	0.00213241	0.0123105
GeneID:107759189	32.09	29.49	33.33	4.35	6.45	6.91	-2.01274	8.08219e-24	3.96554e-22
GeneID:107759706	55.13	39.82	42.58	12.2	15.95	16.42	-1.24093	3.60738e-15	9.88874e-14
GeneID:107791454	8.74	8.63	9.26	1.65	1.71	2.84	-1.72115	8.2356e-12	1.68723e-10
novel.8591	1.96	2.38	3.4	0.11	0.55	0.11	-2.89201	0.000410781	0.00283905
GeneID:107815946	33.48	31.99	28.75	9.75	11.65	11.88	-1.12286	8.57675e-16	2.49771e-14
GeneID:107780492	5.46	5.33	4.79	0.33	1.16	2.73	-1.46396	0.00593051	0.0299579
GeneID:107779504	20.94	22.34	18.05	5.5	5.61	6.62	-1.4201	5.17032e-20	2.02788e-18
GeneID:107788918	0.34	0.79	0.4	0.09	0.1	0.19	-1.62564	0.0105407	0.0488124
novel.10784	1.15	1.41	0.97	0.06	0.14	0.07	-3.33481	0.000665218	0.00438257
novel.20322	6.13	7.64	8.96	2.67	3.18	2.84	-1.00769	1.14295e-06	1.25899e-05
novel.10599	8.23	5.79	2.89	1.89	1.77	1.69	-1.23165	0.00756309	0.0368931
GeneID:107827982	4.91	3.01	4.15	1.19	1.36	1.37	-1.21275	0.00427295	0.022516
GeneID:107780748	1.44	1.36	1.72	0.55	0.31	0.57	-1.27115	0.00580301	0.0294021
GeneID:107810392	26.03	27.15	20.44	7.73	8.8	8.76	-1.18189	1.39433e-16	4.34933e-15
GeneID:107792692	1.4	1.5	2.63	0	0.33	0.74	-1.98429	0.00910712	0.0432075
GeneID:107794052	85.64	98.46	84.33	30.13	27.56	26.11	-1.25064	1.57673e-19	5.97961e-18
GeneID:107763473	28.62	32.55	23.99	8.3	8.34	11.72	-1.18935	3.72178e-10	6.43768e-09
GeneID:107810300	66.8	71.49	75.17	19.76	19.04	19.56	-1.4885	1.79892e-46	2.57772e-44
GeneID:107800059	7.25	7.5	7.93	3.49	2.33	2.49	-1.03565	0.000234403	0.00171822
GeneID:107768874	13.87	14.11	18.95	3.48	6.89	5.72	-1.1307	9.94362e-06	9.42933e-05
GeneID:107782425	7.92	7.65	8.1	2.45	1.89	2.67	-1.46057	4.04077e-13	9.33207e-12
GeneID:107759655	1.04	0.95	0.42	0.2	0.26	0.15	-1.6493	0.00762606	0.0371398
GeneID:107806029	0.99	0.12	0.53	0	0	0.1	-3.72985	0.00752137	0.0367393
GeneID:107785307	1.02	1.4	0.92	0	0.12	0	-4.33075	0.00406736	0.0215974
GeneID:107819024	21.19	24.29	25.01	6.46	7.84	6.4	-1.32514	5.05272e-09	7.63036e-08
GeneID:107761297	6.73	6.16	7.11	1.51	2.81	2.07	-1.23649	0.000276622	0.00199465
GeneID:107770745	6.07	5.54	6.88	1.09	1.07	0.9	-2.1725	8.35108e-08	1.08339e-06
novel.15412	254.65	249.32	399.61	0	0	4.23	-7.01964	6.13291e-11	1.15468e-09
GeneID:107807016	3.46	3.06	2.59	0.76	0.8	0.58	-1.65516	0.0056617	0.0287815
GeneID:107824381	3.41	3.04	2.66	0.86	0.82	0.78	-1.50239	1.87537e-05	0.000169246
GeneID:107808470	2	1.87	2.39	0.58	1.05	0.72	-1.03931	0.00621535	0.0311798
GeneID:107824491	0.69	0.54	0.4	0.1	0.11	0.13	-1.90939	0.00596299	0.0301068
GeneID:107772411	452.2	488.37	425.5	132.36	158.5	141.7	-1.26832	3.05954e-35	2.86309e-33
GeneID:107793535	10.03	10.01	11.02	3	3.06	3.98	-1.26382	2.03984e-14	5.24135e-13
novel.519	4.66	2.35	6.62	1.95	1.2	1.06	-1.27303	0.00344125	0.0186758
GeneID:107802670	11.17	10.85	6.57	0.68	1.27	1.3	-2.68673	2.26323e-08	3.16921e-07
GeneID:107779493	1.88	1.22	1.48	0.46	0.39	0.55	-1.33849	0.00039202	0.00272169
GeneID:107773808	1.34	0.67	0.53	0.05	0	0	-5.09312	0.000300385	0.00214757
GeneID:107814166	11.13	14.16	10.66	3.12	4.04	3.09	-1.39362	6.11969e-08	8.07194e-07
GeneID:107820370	75.17	75.15	74.97	26.5	27.16	31.77	-1.00968	9.48128e-20	3.6367e-18
GeneID:107763171	4.04	3.6	4.46	1.69	1.01	1.33	-1.18191	0.00122531	0.00753241
GeneID:107791982	2.47	3.72	3.69	0.92	1.39	1.34	-1.04063	0.00538542	0.0275688
novel.10392	7.66	10.31	7.05	0.8	1.4	1.87	-2.12362	0.000115123	0.000897756
GeneID:107782946	3.78	4.6	3.63	1.39	1.71	1.06	-1.15972	1.3132e-05	0.000121937
novel.10177	7.56	8.75	6.04	0	0.58	0.2	-4.35059	7.52203e-07	8.50681e-06
novel.26675	1.53	1.14	0.82	0.32	0.18	0.04	-2.26258	0.00109937	0.00683067
GeneID:107764642	10.57	8.71	7.19	3.29	2.16	1.93	-1.31953	0.00010976	0.000859791
GeneID:107770357	5.97	6.18	7.13	1.61	1.88	1.43	-1.58668	5.06544e-11	9.59428e-10
GeneID:107807090	1.74	1.66	2.36	0.38	0.47	0.99	-1.27247	0.0100769	0.0470532
GeneID:107829640	91.14	96.3	81.72	12.19	15.86	16.39	-2.19236	4.20779e-50	6.73767e-48
GeneID:107769118	13.53	11.67	11.47	3.83	4.08	2.43	-1.43377	1.10114e-09	1.8109e-08
GeneID:107831908	14.37	10.57	16.71	3.54	3.68	4.57	-1.37047	9.42991e-06	8.9641e-05
GeneID:107795213	0.99	0.91	0.86	0.31	0.35	0.39	-1.05053	0.00163926	0.00975379
GeneID:107831534	1.95	1.3	1.61	0.43	0.73	0.7	-1.0277	0.0061174	0.0307571
GeneID:107790971	3.36	0.97	1.24	0	0	0	-5.97085	3.69892e-05	0.000317188
GeneID:107785678	748.04	772.12	724.2	203.08	216.68	224.37	-1.42699	1.641e-62	3.66241e-60
GeneID:107809974	2346.29	2101.85	2004.04	745.72	563.56	670.06	-1.22772	7.39141e-28	4.67187e-26
novel.24188	1.38	0.86	1.78	0.44	0.24	0.18	-1.79411	0.00830999	0.0399886
novel.19437	2.6	2.18	2.71	0.21	0.65	0.33	-2.22913	0.00181058	0.0106525
GeneID:107794222	3.16	3.42	3.49	0.58	1.16	1.09	-1.38997	7.92715e-06	7.63048e-05
GeneID:107788053	2.69	2.3	2.25	0.79	0.39	0.71	-1.55039	9.45205e-05	0.000750436
novel.1413	3.58	3.74	2.5	0.34	0.59	0.56	-2.26443	0.00576044	0.0292246
GeneID:107803315	3.06	2.78	2.67	0.6	0.47	0.75	-1.83338	0.000501981	0.00340288
GeneID:107781976	0.57	0.81	0.6	0.04	0.04	0.21	-2.56257	0.00510526	0.0263028
GeneID:107821131	1.09	0.81	0.64	0.1	0	0.08	-3.44587	5.60707e-06	5.53584e-05
GeneID:107775705	2.76	2.73	3.98	0.7	0.88	1.06	-1.44672	0.000430507	0.00296038
GeneID:107781596	84.7	79.57	73.29	18.31	20.93	22.6	-1.51342	2.84051e-25	1.53726e-23
GeneID:107818755	0.32	0.7	0.18	0	0	0	-4.97941	0.00240864	0.013723
GeneID:107804601	0.39	0.18	0.09	0	0	0	-5.10858	0.00157468	0.00940726
GeneID:107763113	7.63	8.75	10.19	2.33	3.12	3.16	-1.2069	6.90576e-05	0.000562986
GeneID:107831582	30.31	28.53	36.48	8.29	12.66	11.74	-1.17954	4.70613e-18	1.63142e-16
GeneID:107814983	48.93	50.07	41.26	10.44	11.76	13.65	-1.5972	1.57245e-32	1.28131e-30
GeneID:107763814	47.74	45.49	46.2	10.38	17.41	12.03	-1.33899	2.1325e-10	3.77937e-09
GeneID:107780585	10.92	13.73	7.92	1.51	2.44	3	-1.80618	6.85897e-10	1.1559e-08
GeneID:107789107	61.82	52.86	48.08	13.02	14.18	17.63	-1.45128	7.50206e-19	2.7262e-17
GeneID:107769903	79.38	78.53	73.49	30.37	29.08	27.2	-1.03112	9.82962e-20	3.76427e-18
GeneID:107829317	2.79	3.97	4.12	0.82	0.87	1.23	-1.54708	5.58782e-07	6.4569e-06
GeneID:107811130	3.69	4.13	3.64	0.61	0.86	1	-1.81857	1.28547e-05	0.000119605
GeneID:107826371	0.4	0.51	0.52	0.05	0.06	0.14	-2.10632	0.00866257	0.0414428
GeneID:107776229	1.91	1.18	0.93	0.11	0.06	0.06	-3.69395	0.000100079	0.000789964
GeneID:107831847	1.62	1.51	1.33	0.38	0.37	0.52	-1.5299	3.79359e-06	3.84613e-05
novel.22161	1.8	2.95	0.9	0.15	0	0	-4.64753	0.00164045	0.00975739
novel.12269	1.94	1.47	1.52	0.59	0.5	0.73	-1.07726	0.000652612	0.00430624
GeneID:107830768	0.63	0.65	0.49	0.23	0.22	0.18	-1.16414	0.00362745	0.0195476
GeneID:107775519	14.28	17.82	11.67	2.08	2.09	3.55	-2.06973	3.58648e-10	6.22501e-09
novel.17980	17.61	28.31	18.24	3.01	1.69	3.57	-2.26236	0.0038518	0.0206156
GeneID:107784323	4.43	5.35	4.14	1.35	1.14	1.72	-1.35965	7.38347e-07	8.36324e-06
GeneID:107829764	1.98	1.97	1.41	0.26	0.29	0.17	-1.6051	0.00226679	0.0130074
novel.4131	2.54	3.05	2.1	0.48	0.43	0.43	-2.09996	0.000501169	0.00339856
GeneID:107788723	285.29	286.4	271.78	87.23	89.58	99.41	-1.2356	1.81877e-42	2.2651e-40
novel.11178	0.66	2.41	1.46	0	0	0	-4.57637	0.00890127	0.0423877
GeneID:107814973	8.94	9.39	7.63	1.93	1.12	1.78	-2.01562	7.25946e-08	9.48847e-07
GeneID:107793260	0.2	0.27	0.23	0	0	0	-4.56385	0.00816328	0.0394017
GeneID:107818687	2.71	2.05	2.38	0.4	0.79	0.51	-1.6779	0.00179773	0.0105873
GeneID:107798315	13.58	18.74	19	4.44	3.13	5	-1.52211	2.96209e-05	0.000258665
novel.18068	1063.19	371.26	572.45	33.23	138.83	81.7	-2.64088	0.000110213	0.000863066
novel.25140	2.62	2.56	2.91	0.97	0.86	1.19	-1.04023	0.00234616	0.0134084
GeneID:107818437	84.22	59.48	39.69	6.79	6.38	6.66	-2.68723	5.43022e-19	1.99632e-17
GeneID:107759896	2.51	3.28	4.1	0.57	1.32	1.36	-1.19559	0.0100524	0.0469651
GeneID:107815886	0.38	0.33	0.19	0	0	0	-5.47978	0.000267522	0.00193511
GeneID:107786661	18.22	13.17	18.43	3.67	3.42	4.6	-1.65892	1.20431e-09	1.97285e-08
GeneID:107772435	31.55	32.98	32.61	9.91	11.51	6.41	-1.34066	8.62056e-09	1.26841e-07
GeneID:107802077	79.18	64.11	40.38	3.65	4.59	8.37	-2.78267	1.42707e-10	2.57532e-09
novel.951	6.39	4.19	3.56	0	0.78	1.01	-2.485	0.00168511	0.00999356
GeneID:107764831	2.02	2.5	1.63	1.12	0.59	0.79	-1.1447	0.00150423	0.00902376
GeneID:107802594	8.49	11.1	8.66	3.28	3.9	3.4	-1.0479	1.04727e-09	1.72681e-08
GeneID:107774391	64.8	63.1	73.73	17.68	22.8	27.32	-1.16151	3.859e-15	1.05327e-13
GeneID:107764502	0.47	0.45	0.6	0	0.04	0.08	-3.33438	0.00332023	0.0181047
GeneID:107767318	78.44	65.65	59.55	22.5	22.65	22.76	-1.12012	9.452e-11	1.73869e-09
GeneID:107783674	1.78	1.77	2.1	0.7	0.65	0.81	-1.04131	1.68956e-05	0.000153614
GeneID:107806558	6.53	6.76	7.41	1.86	2.61	2.32	-1.24099	5.89424e-07	6.78456e-06
GeneID:107772864	7.68	9.41	7.45	1.44	1.05	1.31	-2.25202	6.42637e-08	8.45876e-07
GeneID:107782206	1.21	0.65	0.75	0.17	0	0	-3.49078	0.000558206	0.00374456
GeneID:107788267	135.28	117.49	133.86	48.08	42.52	47.32	-1.0956	1.5191e-24	7.77889e-23
GeneID:107785226	11.07	11.88	10.95	4.14	2.47	3.26	-1.34045	4.03373e-05	0.000343678
GeneID:107823730	0.63	0.26	0.09	0	0	0	-5.11837	0.00177573	0.0104804
novel.15026	2.6	3.3	4.45	1.1	1.42	0.56	-1.33358	0.00452712	0.0236846
GeneID:107796888	12.18	11.97	11.84	2.54	3.77	4.1	-1.39025	2.32515e-08	3.25123e-07
GeneID:107793474	13.41	15.29	18.99	1.75	4.02	3.32	-1.96299	1.2368e-10	2.24722e-09
novel.16590	2.68	3.24	1.39	0.22	0.52	0.77	-1.91964	2.26286e-05	0.000201583
GeneID:107790519	2.68	4.86	2.68	0.68	0	0.36	-2.79924	0.00206359	0.011968
GeneID:107796897	40.61	42.05	36.94	11.84	11.05	11.72	-1.42112	5.53938e-34	4.91668e-32
GeneID:107791557	13.36	14.84	16.09	2.63	3.19	5.65	-1.5766	2.36968e-13	5.59833e-12
GeneID:107810803	11.84	11.06	11.83	3.53	4.09	5	-1.09019	5.37551e-11	1.01625e-09
GeneID:107824376	3.13	2.02	2.15	0.48	0.3	0.59	-2.05438	0.00237261	0.0135406
GeneID:107831394	1.04	0.49	0.29	0.03	0.04	0	-4.24734	0.000869062	0.00555523
GeneID:107796788	3.36	2.91	2.28	0.8	0.89	1.23	-1.18883	0.000419819	0.00289398
GeneID:107807815	64.29	60.65	63.77	15.59	14.82	14.32	-1.61808	1.48861e-22	6.74608e-21
GeneID:107824942	54.39	57.07	43.46	17.38	16.71	20.43	-1.13006	1.05813e-15	3.05675e-14
GeneID:107810466	1.51	2.21	1.26	0.26	0.09	0.38	-2.34508	0.00460999	0.0240757
GeneID:107787477	116.8	117.96	91.6	27.35	29.15	31.67	-1.51874	5.32538e-34	4.7457e-32
GeneID:107773315	502.92	538.34	417.7	32.84	46.44	104.4	-2.30636	1.04008e-05	9.82959e-05
GeneID:107790767	13.2	13.23	12.07	3.94	4.02	4.6	-1.23993	3.56619e-15	9.78114e-14
GeneID:107791466	11.63	10.92	13.38	3.49	2.48	3.64	-1.50296	4.454e-11	8.47116e-10
GeneID:107763558	0.82	1.05	1.86	0.06	0.07	0.07	-3.82664	0.000353299	0.00248224
novel.4663	1170.48	1160.54	1111.66	400.74	424.29	468.91	-1.02553	8.3949e-31	6.28235e-29
GeneID:107796747	0.84	0.6	0.65	0.15	0.14	0.14	-1.92242	0.00504505	0.02603
GeneID:107779810	2.55	1.96	2.39	0.72	0.74	0.71	-1.31179	6.15935e-05	0.000507053
novel.1372	11.66	12.72	16.65	2.62	4.48	4.69	-1.41549	1.87962e-10	3.3465e-09
GeneID:107779835	3.74	4.58	1.73	0.28	0.52	0.6	-2.45383	1.59389e-05	0.000145694
GeneID:107832085	2.91	3.15	2.69	0.79	0.98	0.87	-1.33836	1.92931e-07	2.37463e-06
GeneID:107759523	171.99	186.17	225.38	59.81	65.28	73.6	-1.14838	7.04405e-25	3.678e-23
GeneID:107793863	1.17	1.37	1.37	0.09	0.19	0.19	-2.61546	0.00708542	0.034921
GeneID:107815772	71.34	88.66	90.69	9.64	17.19	18.93	-1.96344	4.26099e-20	1.68169e-18
novel.7127	16.73	16.5	13.15	2.98	3.98	4.39	-1.66477	5.61503e-20	2.19548e-18
novel.9882	14.11	14.68	19.38	3.59	3.53	1.64	-2.06501	1.69213e-19	6.40761e-18
GeneID:107797547	1.31	0.62	1.08	0.09	0.1	0.28	-2.29788	0.000436573	0.00299678
GeneID:107821573	23.19	20.15	19.62	7.23	6.33	5.28	-1.35457	3.32379e-15	9.1312e-14
GeneID:107763451	34.69	33.82	31.84	12.12	10.95	12.37	-1.11824	2.07408e-17	6.90069e-16
GeneID:107825774	86.33	84.68	82.48	29.19	30.79	39.21	-1.00905	3.2446e-19	1.21586e-17
GeneID:107771267	53.67	50.61	56.25	15.27	17.76	20.03	-1.22827	1.6564e-29	1.1492e-27
novel.14144	10.68	11.06	5.91	0.57	2.71	1.71	-1.89629	0.00278943	0.0155965
novel.23112	1.66	7.28	2.54	0.3	0.28	0	-3.74938	0.00572962	0.0290946
GeneID:107826164	0.21	0.27	0.15	0.01	0.03	0.09	-1.94226	0.0104783	0.0485822
GeneID:107791781	6.05	6.58	7.35	0.99	1.99	3.41	-1.22668	0.00267977	0.0150518
GeneID:107829859	35.98	31.98	37.75	12.89	12.21	14.07	-1.05288	7.38363e-18	2.52661e-16
GeneID:107794735	6.95	7.81	10.91	2.12	1.61	1.29	-1.86251	0.000130026	0.00100435
GeneID:107762167	1082.76	1093.34	978.49	328.76	335.1	327.64	-1.27065	1.88037e-41	2.27991e-39
GeneID:107768760	32.12	31.2	33.6	7.46	7.1	6.47	-1.59755	6.94932e-06	6.75239e-05
GeneID:107781631	1.91	2.16	1.54	0.8	0.37	0.71	-1.19143	0.0012145	0.00747232
GeneID:107761395	3	3.33	2.51	0.73	0.65	0.61	-1.80768	4.13068e-12	8.68113e-11
novel.696	578.26	546.42	430.37	91.36	114.07	124.58	-1.84029	2.28608e-43	2.94152e-41
novel.12709	9.83	10.2	7.06	1.23	0.5	1.7	-2.59891	3.59265e-09	5.53143e-08
GeneID:107811362	33.61	33.94	33.52	10.59	11.54	10.66	-1.26357	2.31631e-31	1.7837e-29
GeneID:107812074	0.89	0.69	0.31	0.15	0	0	-3.18973	0.003131	0.0172256
GeneID:107775239	4.28	5.07	4.07	1.74	1.05	1.62	-1.15313	0.00199354	0.0116151
GeneID:107781452	3.32	4.29	2.9	1.47	0.85	1.38	-1.0548	0.000280341	0.00201886
GeneID:107766620	11.29	11.26	13.03	3.45	3.53	4.84	-1.20998	4.83808e-10	8.28337e-09
novel.7697	594.99	557.4	377.76	123.94	132.41	144.81	-1.5349	2.59877e-25	1.40946e-23
GeneID:107821339	5.38	5.13	5.74	1.05	1.77	2.81	-1.18314	1.15863e-05	0.000108746
GeneID:107804656	23.75	21.99	22.05	8.35	8.6	8.05	-1.06574	3.7535e-16	1.12358e-14
GeneID:107797391	2.89	2.75	3.84	0.65	1	1.32	-1.31948	2.3978e-07	2.90309e-06
GeneID:107788247	0.65	1.02	0.81	0.1	0.26	0.18	-1.82451	0.00582075	0.0294772
GeneID:107776928	38.12	37.62	32.58	10.18	10.51	10.67	-1.4034	2.26777e-25	1.23525e-23
GeneID:107805427	7.87	11.47	5.51	2.08	2.19	2.54	-1.51467	6.71173e-11	1.25802e-09
GeneID:107815569	1.87	2.07	2.02	0.58	0.62	0.91	-1.12831	0.00931778	0.0440592
GeneID:107826915	3.15	3.42	2.76	0.83	1.44	0.88	-1.19485	4.83272e-05	0.000405924
GeneID:107801254	0.73	0.53	0.61	0.16	0.18	0.33	-1.11648	0.00899212	0.0427598
GeneID:107827354	0.86	0.43	0.72	0.04	0.1	0.1	-2.72489	0.00481613	0.0250047
GeneID:107774941	1.1	0.63	0.62	0.18	0.15	0.12	-2.01225	0.00137099	0.00832645
GeneID:107767384	0.26	0.4	0.26	0	0.04	0	-4.26558	0.00504769	0.0260407
GeneID:107828541	2.95	3.51	2.21	0.53	0.64	1.23	-1.461	0.0011621	0.00717973
GeneID:107824309	2.38	2.7	2.78	0.77	0.81	1.06	-1.23754	5.59065e-07	6.4587e-06
GeneID:107763459	2.19	3.02	2.15	0.79	0.93	0.81	-1.17533	6.10587e-05	0.000503226
GeneID:107760226	3.38	3.13	3.12	0.47	0.91	1.11	-1.58465	7.78493e-06	7.50505e-05
GeneID:107813411	0.78	0.84	1.14	0.13	0.27	0.47	-1.30174	0.00913845	0.0433288
GeneID:107800002	27.48	25.33	27.92	3.4	3.98	6.86	-2.01316	6.30444e-11	1.18476e-09
GeneID:107760974	80.04	72.08	126.22	15.33	32.37	33.49	-1.40081	0.000150761	0.00115094
GeneID:107831677	294.06	287.56	281.15	97.45	103.12	110.88	-1.102	1.02137e-36	1.01412e-34
GeneID:107792330	17.07	16.24	22.89	1.57	6.75	5.06	-1.65375	4.15712e-07	4.88597e-06
GeneID:107778476	10.2	7.73	8.96	2.95	2.52	3.62	-1.1782	3.23941e-07	3.86179e-06
novel.21695	15.92	14.84	14.92	3.69	3.02	3.45	-1.76472	7.88924e-16	2.30281e-14
novel.19287	37.56	35.58	33.22	8.59	9.61	10.86	-1.57802	4.01699e-15	1.0952e-13
GeneID:107786891	26.51	27.24	25.47	10.16	9.59	10.94	-1.02224	2.75696e-17	9.08877e-16
GeneID:107764360	6.09	6.11	5.92	0.99	1.54	1.44	-1.74599	0.000163853	0.00124186
GeneID:107793291	19.83	18.43	22.48	5.93	7.89	7.36	-1.13891	1.24632e-16	3.89969e-15
GeneID:107802106	1.75	2.57	2.3	0.42	0.88	0.55	-1.47652	5.86382e-06	5.76878e-05
novel.1890	11.78	9.91	9.18	3.37	3.38	4.74	-1.0054	0.000572747	0.00383191
GeneID:107784644	7.77	6.35	7.77	2.09	2.32	3.32	-1.10113	0.000241031	0.0017627
GeneID:107827662	286.09	288.5	263.11	87.01	84.59	103.36	-1.21514	5.17072e-30	3.73113e-28
GeneID:107813833	2.42	2.46	2.5	0.52	0.46	0.66	-1.74463	0.00362151	0.0195218
GeneID:107763041	9.75	9.35	8.66	2.98	3.66	2.8	-1.17808	3.61705e-09	5.5673e-08
GeneID:107823220	4.27	3.85	3.59	1.45	1.45	1.52	-1.04099	5.38185e-07	6.22746e-06
GeneID:107759712	3.4	3.07	3.59	1.01	0.92	1.12	-1.32379	0.00010301	0.000811318
GeneID:107815581	1.69	1.65	1.89	0.22	0.74	0.57	-1.40094	0.00291268	0.016203
novel.15591	5.87	6.12	3.36	0.88	0.91	1.44	-1.94252	0.00301341	0.0166733
GeneID:107801674	3.35	3.21	4.15	0.54	1.45	1.17	-1.37074	0.001792	0.0105604
GeneID:107768768	5.63	5.28	6.77	2.56	2.51	1.35	-1.05086	0.000171246	0.00129323
GeneID:107783605	1.08	1.02	1.1	0.16	0.41	0.35	-1.4279	0.00430719	0.0226656
GeneID:107775626	2.28	2.63	2.39	0.48	0.67	0.9	-1.42658	0.00585045	0.0296127
GeneID:107820828	8.09	6.87	10.35	2.08	2.05	1.73	-1.72672	7.5117e-15	2.00134e-13
GeneID:107778414	5.29	6.7	4.63	1.95	1.88	2.33	-1.02789	0.00196349	0.0114559
GeneID:107798135	9.31	10.76	9.6	2.4	2.75	2.89	-1.50472	1.4874e-14	3.87515e-13
GeneID:107781475	1.71	1.84	1.72	0.57	0.46	0.24	-1.65897	6.55933e-05	0.00053735
novel.25748	164.28	162.7	176.48	23	30.84	35.78	-2.12018	1.28092e-69	3.49235e-67
novel.6354	4.34	4.21	6.46	1.87	1.42	2.31	-1.01685	0.00302046	0.0167031
novel.21072	3.14	7.04	3.24	0	0	0	-5.24423	0.000776361	0.00502811
GeneID:107820207	47.99	47.17	40.4	14.67	14.07	12.79	-1.40152	2.02864e-24	1.02733e-22
GeneID:107803262	6.57	5.6	6.22	1.23	0.7	2.02	-1.76928	0.000409145	0.00282813
novel.17677	2.81	3.56	1.16	0.06	0.42	0.56	-2.47233	0.00018543	0.00138726
GeneID:107791429	166.45	157.39	128.81	36.43	35.16	42.26	-1.61641	7.25344e-38	7.54343e-36
GeneID:107765126	2.06	0.81	1.06	0.16	0.11	0.17	-2.7552	0.000455132	0.003114
GeneID:107830924	9.99	8.18	7.74	0.66	0.83	0.69	-3.09265	5.37986e-08	7.14656e-07
GeneID:107822936	2.68	2.41	2.57	0.9	0.78	0.62	-1.36146	1.35779e-06	1.47726e-05
novel.22797	26.46	24.76	21.04	3.84	2.48	2.96	-2.54804	2.30009e-28	1.50278e-26
GeneID:107821070	2.87	3.41	3.09	1.06	1.61	0.42	-1.22768	0.00110518	0.00686167
novel.4400	12.73	13.24	10.54	2.9	1.74	2.4	-1.97608	1.56328e-15	4.42729e-14
GeneID:107825366	1.51	1.82	1.51	0.14	0.5	0.5	-1.75118	0.000682471	0.00448218
novel.8435	5.16	5.88	3.57	0	0	0	-8.25097	2.64544e-11	5.14393e-10
novel.10432	2.07	2.87	1.68	0.32	0.43	0.16	-2.49287	3.62891e-07	4.29366e-06
novel.18060	5.04	4.46	7.05	1.09	1.29	1.89	-1.56901	5.10494e-07	5.92881e-06
GeneID:107767963	38.49	33.51	37.67	6.8	8.53	11.22	-1.68824	3.30546e-34	2.96136e-32
GeneID:107823919	18.01	21.38	19.34	3.7	3.88	3.22	-1.94153	1.34242e-08	1.92907e-07
GeneID:107803642	0.17	0.13	0.26	0.02	0.04	0	-3.08171	0.00950494	0.0448014
novel.24865	1.86	2.87	1.62	0	0	0	-4.58339	0.00788032	0.0382151
GeneID:107829752	1.87	2.41	1.87	0.57	0.7	1.01	-1.00384	0.0105345	0.0487926
GeneID:107771689	6.52	7.17	6.45	1.72	2.18	2.56	-1.27691	9.39742e-09	1.3751e-07
novel.27179	2.19	2.55	2.28	0.78	0.95	0.92	-1.03792	0.000874703	0.00558612
GeneID:107789491	1.19	1.59	0.72	0.23	0.24	0	-2.47519	0.00948102	0.0447179
GeneID:107791758	1.25	1.57	1.23	0.28	0.13	0	-2.87334	4.64934e-05	0.000391892
GeneID:107814030	2.89	3.19	2.62	1.35	0.61	0.38	-1.46373	0.00494134	0.0255811
novel.27111	1.2	1.51	4.33	0.17	0.09	0.36	-3.10651	0.000182045	0.00136558
GeneID:107768856	2.94	1.71	1.45	0.32	0.21	0.42	-2.29145	0.000390255	0.00271205
GeneID:107776643	201.04	205.69	211.2	78.18	78.83	76.99	-1.02458	1.57608e-33	1.36591e-31
GeneID:107802477	16.1	18.11	14.96	4.86	6.13	5	-1.21038	1.47095e-09	2.38105e-08
GeneID:107812859	5.69	5.9	5.17	1.43	1.7	2.44	-1.21573	4.91369e-06	4.89902e-05
novel.25362	38.08	45.59	45.35	7.23	13	12.12	-1.60367	1.00496e-19	3.843e-18
GeneID:107780276	0.72	1.37	2.18	0.24	0.33	0.2	-2.05417	0.00480608	0.0249602
GeneID:107786779	7.05	8.74	6.56	1.58	2.49	2.44	-1.39746	1.80935e-07	2.23462e-06
GeneID:107822911	2.4	2.22	1.31	0.74	0.62	0.79	-1.22163	1.6704e-05	0.000151972
GeneID:107827618	2.18	2.95	2.77	0.85	1.24	0.91	-1.01809	0.00874706	0.0417885
GeneID:107777622	40.03	32.34	35.33	0	0	0	-9.24924	1.81306e-14	4.68729e-13
novel.19764	6.11	4.89	3.96	1.41	1.44	1.15	-1.43208	0.00912502	0.0432776
GeneID:107806763	8.4	11.51	13.52	2.65	3.02	2.13	-1.62319	3.42394e-05	0.000295568
GeneID:107832007	125.18	134.51	130.51	43.97	49.8	52.12	-1.04534	3.19626e-29	2.18746e-27
GeneID:107827822	2.54	2.59	2.97	0.13	0.58	0.72	-2.08132	0.000235154	0.00172322
novel.4271	9.31	10.21	9.61	2.64	2.88	2.81	-1.36535	4.1905e-05	0.000356373
novel.625	3.68	3.93	6.94	1.36	1.79	1.03	-1.37651	0.00110662	0.00686806
GeneID:107787142	31.04	33.08	33.26	10.18	8.51	7.97	-1.46827	3.40929e-21	1.42588e-19
GeneID:107761640	193.27	195.48	205.66	54.99	58.35	66.99	-1.32723	9.0293e-43	1.13573e-40
GeneID:107794311	11.05	11.73	12.92	2.61	2.1	4.42	-1.52885	5.2102e-06	5.17317e-05
GeneID:107821019	0.54	0.69	0.64	0.15	0.15	0.14	-1.71315	0.00360244	0.0194273
GeneID:107819466	6.72	14.44	10.02	2.06	1.85	2.31	-1.37228	3.80813e-06	3.85855e-05
GeneID:107804016	3.56	1.22	2.06	0.62	0.07	0.07	-2.7485	0.0103595	0.0481119
GeneID:107810981	79	80.77	56.6	19.85	21.28	18.55	-1.43905	1.60662e-17	5.39524e-16
GeneID:107774519	8.54	8.85	9.89	3.73	3.28	3.48	-1.00018	1.82275e-09	2.91958e-08
GeneID:107830894	13.01	12.66	17.64	4.04	5.52	5.98	-1.08642	2.71616e-07	3.26425e-06
GeneID:107796429	0.49	0.64	0.33	0.14	0.09	0.09	-1.82531	0.00634088	0.0316975
GeneID:107799603	2.55	2.67	4.36	1.29	0.8	1.3	-1.2191	0.0103686	0.0481433
GeneID:107804942	232.28	208.41	242.94	30.39	39.45	44.52	-2.16631	3.36438e-68	8.83833e-66
novel.3640	3.16	4.71	4.44	0.03	0.03	0	-7.74914	1.53839e-13	3.70205e-12
GeneID:107763068	4.92	3.98	4.52	1.38	1.16	1.31	-1.40996	5.99057e-06	5.89002e-05
GeneID:107827110	7.56	7.92	6.66	2.17	2.77	2.67	-1.18271	5.88716e-12	1.22299e-10
GeneID:107787568	36.41	42.22	50.38	16.6	14.94	12.25	-1.06432	9.98586e-07	1.11089e-05
GeneID:107768301	6.48	6.17	6.44	2.47	1.55	3.05	-1.02637	0.0013526	0.00822725
GeneID:107826302	31.5	30.69	31.34	8.91	10.19	10.49	-1.28368	3.48015e-28	2.24757e-26
GeneID:107786220	5120.68	4294.14	3313.94	1311.8	1541.01	1447.79	-1.10306	1.55744e-15	4.41325e-14
GeneID:107790951	273.26	267.3	247.56	37.37	47.71	46.08	-1.93173	1.79863e-26	1.04638e-24
novel.8583	51.71	14.08	10	0	2.91	0.35	-4.00029	0.005018	0.0259141
novel.16392	2.67	2.4	2.29	0.44	1.08	0.78	-1.29422	0.00528412	0.0271162
GeneID:107825945	46.92	43.96	56.89	15.17	14.5	19.75	-1.18367	2.12279e-16	6.50099e-15
GeneID:107779072	1.02	1.28	0.74	0.39	0.37	0.31	-1.13918	0.000156408	0.00119026
novel.5011	7.53	7.27	9.41	3.11	0.88	3.48	-1.28278	0.00133405	0.00812754
GeneID:107819647	2.55	1.67	2.22	0.07	0.24	0.32	-2.94856	7.56972e-05	0.000613012
novel.3055	21.02	19.43	36.43	1.56	6.46	5.72	-2.07635	0.000537386	0.0036181
GeneID:107787250	5	2.51	5.53	1.55	1.29	1.62	-1.14276	0.00263307	0.0148208
GeneID:107772612	5.47	6.04	3.42	0.23	1.6	0.48	-2.1463	0.00700419	0.034568
novel.8826	12.97	9.82	5.9	3.28	1.31	1.88	-1.7	8.86587e-05	0.000708469
GeneID:107813610	3.21	3.09	3.94	1.12	1.18	1.47	-1.05472	0.00139125	0.00843532
GeneID:107792266	0.56	0.51	1.01	0	0	0.08	-4.27496	0.00507361	0.0261584
GeneID:107801297	12.75	12.43	12.02	4.03	4.12	3.9	-1.20681	1.63007e-06	1.75158e-05
novel.6443	2.15	2.6	2.15	0.73	0.35	0.62	-1.62616	0.000169945	0.00128456
GeneID:107799773	14.16	18.6	13.23	3.88	5.53	4.63	-1.27115	1.0069e-05	9.5393e-05
GeneID:107766287	1.42	1.66	1.4	0.64	0.39	0.25	-1.4118	0.00271806	0.0152499
GeneID:107808539	23.08	22.9	18.25	3.45	3.84	5.16	-1.89385	9.61586e-10	1.59544e-08
GeneID:107825864	105.81	105.23	126.1	25.06	27.63	36.43	-1.51386	8.43349e-30	5.96676e-28
novel.10400	1.94	1.68	2.01	0.56	0.61	0.58	-1.30784	0.000475524	0.00323815
GeneID:107797219	31.94	25.72	30.14	3.93	5.54	5.33	-2.05873	8.06097e-12	1.65212e-10
GeneID:107760252	12.57	12.89	13.54	2.03	2.52	3.97	-1.77838	8.19468e-10	1.3691e-08
GeneID:107813253	5.93	6.51	5.48	2.18	2.24	2.52	-1.00687	2.18653e-10	3.87106e-09
novel.20688	5.17	4.65	4.88	1.25	1.47	2.09	-1.24111	9.10288e-07	1.01963e-05
GeneID:107773952	1.09	1.22	1.43	0.07	0.15	0.11	-3.13635	3.41345e-06	3.48383e-05
GeneID:107796333	16.57	14.29	18.99	0.51	1.48	3.36	-2.68267	1.56357e-07	1.95113e-06
GeneID:107789014	0.36	0.1	0.17	0	0	0	-4.55881	0.00960617	0.0451898
novel.24705	9.33	7.83	8.3	3.95	2.7	3.51	-1.03124	0.000221007	0.00162759
GeneID:107770853	0.84	1.11	0.84	0.31	0.19	0.35	-1.34436	0.00375067	0.0201427
GeneID:107795436	1691.11	1619.63	1431.01	578.8	502.32	532.13	-1.17565	6.96887e-27	4.13533e-25
GeneID:107803555	2.17	2.34	1.79	0.37	0.34	0.61	-1.87769	5.32781e-06	5.28163e-05
GeneID:107807631	15.13	13.94	15.67	4.27	3.65	2.67	-1.66203	9.41328e-12	1.91914e-10
GeneID:107784768	17.46	17.3	13.5	3.14	4.7	4.51	-1.59655	9.79333e-17	3.08531e-15
GeneID:107794752	1.8	1.97	2.11	0.54	0.73	0.75	-1.17416	6.48133e-05	0.000531391
GeneID:107792300	1.43	1.63	1.36	0.18	0.39	0.66	-1.50043	0.000374827	0.00261746
GeneID:107789113	19.77	15.44	18.82	5.44	5.27	5.69	-1.33759	6.49319e-16	1.91191e-14
GeneID:107831969	1.04	0.88	1.43	0.2	0.39	0.25	-1.71602	0.0105405	0.0488124
GeneID:107788119	473.41	455.6	488.31	109.26	203.16	190.39	-1.04424	8.50886e-05	0.000682101
GeneID:107829064	5.62	7.81	5.99	1.31	1.36	2.92	-1.35079	0.00332057	0.0181047
GeneID:107819521	349.4	328.84	300.11	99.92	89.77	97.65	-1.38747	6.1038e-39	6.64946e-37
GeneID:107776791	5.18	3.98	5.58	1.72	1.88	1.45	-1.17779	1.82051e-08	2.57646e-07
GeneID:107794809	0.9	0.91	0.73	0.47	0.25	0.17	-1.24941	0.00594862	0.0300403
GeneID:107773316	15.93	14.06	12.54	2.31	3.09	4.04	-1.74392	6.0807e-09	9.09293e-08
GeneID:107788709	12.42	11.2	10.71	3.16	5.47	3.6	-1.07403	0.000109521	0.000858187
novel.7525	8.79	7.66	5.22	0.94	2.09	2.26	-1.60188	0.000269368	0.00194679
GeneID:107776286	1.25	1.49	1.6	0.36	0.71	0.58	-1.03924	0.00344455	0.0186868
GeneID:107817630	3904.67	3860.78	2874.65	1111.98	1066.83	1108.27	-1.29778	8.853e-26	4.95051e-24
GeneID:107807372	1.25	1.64	1.43	0.36	0.47	0.43	-1.40616	0.00319832	0.0175386
GeneID:107811163	40.61	42.96	32.57	5.19	11.54	15.35	-1.13304	5.82435e-06	5.7333e-05
GeneID:107821737	25.29	25.73	28.47	5.17	4.93	6.95	-1.74754	4.65725e-11	8.84439e-10
GeneID:107784158	2.01	1.91	1.69	0.26	0.64	0.26	-1.9074	1.39731e-05	0.000129272
GeneID:107811220	5.19	4.97	3.93	1.56	1.31	1.49	-1.32116	1.45522e-08	2.08345e-07
GeneID:107811832	0.44	0.62	0.62	0.08	0.25	0.09	-1.65996	0.00759529	0.037018
novel.11218	4.94	5.13	3.12	0.76	1.68	0.29	-1.87942	3.75744e-05	0.000321659
GeneID:107798677	7.77	6.24	6.82	1.74	2.95	2.91	-1.07312	5.96852e-05	0.000492953
GeneID:107792716	0.74	0.62	0.05	0.04	0	0	-4.56212	0.00340182	0.0184917
novel.2041	8.6	9.71	7.86	1.91	3.29	3.57	-1.18769	1.57466e-05	0.000144093
novel.3696	2.75	3.01	2.12	1.28	0.59	1.14	-1.01396	0.00951333	0.0448284
GeneID:107826207	1.53	0.53	0.25	0	0.05	0	-5.2207	0.000273251	0.00197231
GeneID:107789771	454.95	444.58	358.59	135.99	128.57	138.07	-1.2447	2.16689e-26	1.25053e-24
GeneID:107830179	218.38	216.18	220.75	75.62	79.78	88.78	-1.02895	2.6604e-28	1.72922e-26
GeneID:107768890	6.76	5.88	8.06	2.16	2.37	3.04	-1.068	1.00001e-05	9.48114e-05
GeneID:107758965	8.86	9.22	9.12	2.16	2.81	2.97	-1.41858	1.50577e-16	4.67381e-15
GeneID:107831207	4.09	5.85	5.19	0.58	1.74	2.18	-1.33728	0.00383687	0.0205422
GeneID:107828438	0.92	1.3	1.05	0.45	0.16	0.42	-1.29269	0.00375038	0.0201427
GeneID:107815849	0.86	0.67	0.8	0.22	0.17	0.27	-1.44913	0.000896774	0.00571044
GeneID:107813615	248.73	251.08	238.41	78.23	93.44	100.76	-1.06311	2.78464e-26	1.59607e-24
GeneID:107827206	0.86	0.82	1.43	0.31	0.21	0.21	-1.67425	0.00720336	0.035414
GeneID:107788879	53.45	19.47	21.92	6.52	1.01	0.51	-3.12475	0.00467608	0.0243674
GeneID:107796858	33.92	35.79	50.94	5.4	6.41	7.37	-2.22907	6.52005e-28	4.12628e-26
GeneID:107759885	1.43	1.19	1.41	0.56	0.24	0.48	-1.25833	0.00288063	0.0160459
GeneID:107800836	2.04	1.56	1.53	0.38	0.5	0.38	-1.64293	0.000313526	0.00222543
GeneID:107795948	152.06	149.14	146.97	51.8	49.76	51.74	-1.17206	1.67635e-36	1.65143e-34
GeneID:107781073	16.48	17.44	19.14	5.18	5.8	6.67	-1.18386	2.37026e-09	3.73606e-08
GeneID:107819871	20.39	27.03	23.18	6.5	8.28	9.33	-1.15119	1.22432e-09	2.00434e-08
GeneID:107792855	2.71	2.3	2.5	0.58	0.68	0.52	-1.68974	1.27777e-05	0.000118954
novel.13274	4.01	4.13	4.29	0.32	0	0.32	-3.75061	0.00412721	0.0218621
novel.27578	4.24	4.64	3.54	0.8	0.43	1.48	-1.7884	0.000215573	0.00159105
GeneID:107776208	0.76	1.13	0.76	0.18	0.25	0.32	-1.44565	0.0039529	0.0210695
GeneID:107795421	6.1	6.14	6.33	2.73	1.45	1.58	-1.42521	2.92112e-08	4.02454e-07
GeneID:107816580	7.72	8.96	7.07	2.7	2.65	3.34	-1.05129	9.5185e-05	0.000755355
GeneID:107760915	1.8	1.78	2.83	0.53	0.69	0.58	-1.43819	0.00326166	0.0178374
GeneID:107807808	186.95	193.86	189.09	54.97	54.85	62.1	-1.35805	8.40222e-51	1.37152e-48
GeneID:107823057	5.06	6.36	5.5	1.86	1.35	2.63	-1.10945	0.00553262	0.0282164
GeneID:107785411	86.33	87.94	81.11	24.66	27.3	29.8	-1.236	1.99627e-23	9.5531e-22
GeneID:107762828	1.78	1.43	1.65	0.37	0.37	0.38	-1.66523	0.00110042	0.00683464
GeneID:107819267	1.49	2.6	2.02	0.84	0.35	0.51	-1.45452	7.89595e-05	0.00063763
GeneID:107782428	0.01	0.09	0.24	0	0	0	-5.42105	0.000771639	0.00500202
GeneID:107789804	1.5	0.77	1.39	0.23	0.38	0.28	-1.66954	0.000284635	0.00204599
GeneID:107776943	29	31.96	27.94	5.9	5.83	6.49	-1.90792	1.64171e-38	1.75809e-36
novel.19349	1.21	1.45	2.72	0.23	0.12	0.24	-2.74377	0.00470636	0.024513
GeneID:107807691	1.71	1.74	1.71	0.95	0.54	0.38	-1.07509	0.00232445	0.0132989
GeneID:107807401	1.16	2.49	1.66	0.28	0.26	0.77	-1.64798	0.00353861	0.0191271
GeneID:107823532	6.72	7.74	6.6	1.63	2.82	2.83	-1.15183	1.19178e-05	0.000111649
GeneID:107767677	2.65	3.95	3.52	1.19	1.19	1.24	-1.09005	0.00246204	0.0139799
GeneID:107766988	15.51	16.09	15.73	3.86	4.18	4.68	-1.49888	3.32585e-25	1.7865e-23
GeneID:107801926	7.66	6.39	6.86	1.42	1.67	2.08	-1.6603	3.8229e-15	1.04398e-13
GeneID:107811413	0.85	0.99	1.1	0.2	0.35	0.36	-1.3174	0.00687735	0.0340267
GeneID:107782949	251.42	247.57	246.92	90.89	91.42	89	-1.08044	8.175e-35	7.52443e-33
GeneID:107763864	23.37	24.8	27.26	9	7.76	8.49	-1.17602	4.73415e-13	1.08836e-11
GeneID:107781561	12.72	13.33	11.28	3.86	4.48	4.73	-1.0952	1.70192e-05	0.000154617
GeneID:107768506	0.9	0.75	1.09	0.24	0.33	0.29	-1.32164	0.00292275	0.0162501
GeneID:107770113	11.09	10.7	10.38	2.42	2.56	3.4	-1.57084	3.69688e-18	1.28598e-16
GeneID:107785911	3.26	2.85	2.49	0.65	0.96	0.45	-1.67064	0.000329721	0.00233219
GeneID:107804497	3.55	2.41	2.17	0.96	0.34	0.34	-1.8608	0.00607384	0.0305625
GeneID:107818867	3.5	4.58	1.33	0.53	0.99	0.94	-1.56084	0.00144638	0.00872031
GeneID:107807187	14.1	13.24	18.3	4.34	6.53	6.17	-1.00819	1.85199e-05	0.000167256
GeneID:107765797	1.41	1.96	1.34	0.55	0.44	0.79	-1.05456	0.000515894	0.00348716
novel.6218	35.55	33.56	26.94	7.27	7.98	7.9	-1.67373	4.20814e-25	2.24134e-23
GeneID:107829499	111.43	115.64	105.77	35.86	36.01	38.69	-1.2178	1.96903e-35	1.85638e-33
GeneID:107782851	1.07	1.12	0.88	0.32	0.46	0.44	-1.00006	0.00381911	0.0204601
GeneID:107800003	22.67	21.56	18.08	6.45	8.11	7.32	-1.14167	3.31768e-14	8.4194e-13
GeneID:107772591	37.46	23.97	9.62	0.24	0	0	-7.55477	1.92429e-09	3.07442e-08
GeneID:107830058	1.41	1.6	1.53	0.31	0.62	0.66	-1.16899	0.00139081	0.00843366
GeneID:107819934	566.8	554.11	545.11	202.13	182.12	187.4	-1.1441	1.40219e-33	1.21939e-31
GeneID:107817860	361.61	363.55	303.12	103.11	95.79	107.54	-1.37698	8.0034e-36	7.64552e-34
GeneID:107803843	2.92	0.86	0.44	0.32	0.06	0.09	-2.77469	7.74661e-05	0.000626071
GeneID:107800467	6.07	6.3	9.1	1.1	2	1.57	-1.79493	1.54384e-07	1.92747e-06
GeneID:107786097	21.55	21.86	21.37	6.88	9.19	7.09	-1.08459	1.50743e-09	2.43853e-08
GeneID:107804650	1.53	1.3	1.19	0.44	0.49	0.53	-1.10902	0.0068401	0.0338808
GeneID:107808401	2.72	2.48	3.08	0.69	0.84	1.44	-1.03261	0.00510663	0.0263048
novel.20702	4.45	4.12	3.59	0.62	1.51	0.76	-1.65789	0.000701872	0.00459368
GeneID:107794424	0.66	0.41	0.23	0.12	0	0.02	-2.80018	0.00169702	0.0100583
GeneID:107770298	0.39	0.12	0.26	0	0	0	-4.54513	0.00964397	0.0453085
GeneID:107807053	26.22	27.11	27.36	9.63	9.41	10.71	-1.03683	4.96755e-11	9.41948e-10
novel.13600	8.39	8.07	6.82	2.13	3.03	3.01	-1.16127	5.9822e-13	1.35429e-11
GeneID:107808763	1.81	1.78	2	0.57	0.72	0.69	-1.12849	0.000838508	0.00538291
GeneID:107827548	5.63	5.87	6.97	1.63	2.39	2.81	-1.07435	3.5964e-07	4.25819e-06
GeneID:107781594	2.68	2.59	1.71	0.46	1.25	0.81	-1.12143	0.00055957	0.00375221
GeneID:107832727	4.31	4.54	4.42	0.91	1.21	1.58	-1.48081	6.64689e-09	9.89267e-08
GeneID:107811343	3.13	2.87	4.42	0.58	1.19	0.96	-1.55746	3.22823e-05	0.000279871
GeneID:107817420	380.62	423.54	386.87	117.43	126.68	133.23	-1.27777	3.31685e-44	4.41421e-42
GeneID:107810189	280.86	281.92	262.28	75.93	93.75	101.22	-1.2158	5.5151e-29	3.71893e-27
GeneID:107764326	7.53	8.76	8.45	2.93	2.5	3.26	-1.11622	2.71348e-06	2.8179e-05
GeneID:107770947	9.32	10.19	8.8	3.16	3.13	3.55	-1.14786	4.38126e-10	7.52935e-09
GeneID:107827527	14.68	15.68	15.63	3.93	4.17	3.8	-1.55656	9.17992e-16	2.6626e-14
GeneID:107807313	30.29	32.01	45.35	10.69	14.34	16.31	-1.00132	3.04727e-10	5.32022e-09
GeneID:107781844	1.92	2.19	1.94	0.66	0.4	0.81	-1.33451	0.000404499	0.00279908
GeneID:107831858	186.51	176.92	189.36	45.33	82.42	68.27	-1.59269	3.80054e-50	6.10495e-48
novel.6878	18.16	14.14	17.34	4.02	6.27	5.81	-1.23492	2.16388e-09	3.43112e-08
GeneID:107822350	132.05	109.78	144.56	32.49	33.52	39.5	-1.40178	1.03222e-22	4.72454e-21
GeneID:107785229	38.44	41.12	22.54	10.03	10.42	9.75	-1.35753	2.71431e-10	4.76205e-09
GeneID:107800536	99.67	102.53	106.9	31.94	39.34	41.9	-1.06195	3.22285e-22	1.4272e-20
GeneID:107815644	7.61	7.02	7.87	2.17	2.86	2.83	-1.15629	8.34966e-13	1.86514e-11
GeneID:107793690	23.6	23.19	19.76	7.61	7.68	8.68	-1.10936	3.4521e-17	1.12408e-15
GeneID:107792678	12.11	12.68	11.62	2.68	4.19	3.51	-1.37565	2.12908e-06	2.24569e-05
novel.19215	9.96	9.9	13.47	3.92	3.29	1.84	-1.40808	0.000186253	0.00139197
GeneID:107819142	28.81	26.4	25.77	7.74	8.42	8.33	-1.30724	6.98081e-12	1.43716e-10
novel.15942	4.5	3.8	4.61	1.62	1.13	1.46	-1.22046	0.000188831	0.00140936
GeneID:107824961	4.99	3.96	4.26	1.45	0.92	1.64	-1.33768	3.32063e-05	0.000287288
GeneID:107796356	2.06	2.14	1.93	0.38	0.55	0.42	-1.80797	3.90252e-08	5.28143e-07
GeneID:107792671	10	9.46	8.09	1.54	1.8	3.16	-1.70343	8.65534e-09	1.27279e-07
novel.9498	5.97	7.89	8.4	0.99	1.25	2.72	-1.75256	9.86357e-06	9.3587e-05
GeneID:107783840	0.87	0.87	0.72	0.26	0.13	0.11	-1.87044	0.00123336	0.00757542
novel.10047	178.11	177.34	203.77	22.05	42.67	63.99	-1.68036	4.63386e-05	0.000390717
GeneID:107785898	35.31	33.35	42.6	12.16	14.09	14.91	-1.06107	4.25322e-19	1.57857e-17
GeneID:107832524	73.93	70.93	82.92	26.03	25.91	31.05	-1.07761	6.02002e-25	3.15966e-23
GeneID:107769127	2.75	2.47	2.62	0.39	0.21	0.54	-2.38752	1.58309e-06	1.70436e-05
GeneID:107779548	3.14	2.54	4.6	0.66	0.88	0.71	-1.77872	0.000515862	0.00348716
GeneID:107809318	3.1	3.45	2.65	0.93	0.24	0.62	-1.90989	0.00384052	0.0205595
GeneID:107763907	7.19	9.31	10.04	1.38	0.81	0.88	-2.39982	0.00507032	0.0261441
GeneID:107796739	107.68	114.43	114.06	37.33	36.78	41.85	-1.13708	3.1388e-27	1.90058e-25
novel.1310	6.26	4.73	8.86	1.05	1.59	1.54	-1.86753	2.69149e-07	3.23691e-06
GeneID:107773794	69.43	65.83	52.14	11.46	11.24	12.1	-2.05967	1.63168e-52	2.84776e-50
GeneID:107780244	392.7	388.33	343.68	137.05	132.42	141.79	-1.06612	4.26184e-26	2.41803e-24
novel.8252	3.45	3.36	3.24	0.43	0.8	1.16	-1.64948	0.00434188	0.0228339
GeneID:107803169	3.84	2.81	3.89	0.83	1.23	1.12	-1.3417	0.00024688	0.00179948
GeneID:107786522	1.31	1.1	1.11	0.31	0.46	0.55	-1.08157	0.000383773	0.00267327
GeneID:107808410	1.8	1.99	2	0.68	0.76	0.53	-1.22249	0.000685258	0.00449814
GeneID:107772621	12.4	26.45	7.98	3.43	7.61	3.28	-1.25658	0.00318668	0.0174843
GeneID:107784262	2.25	2.13	1.86	0.66	0.5	0.72	-1.34185	0.00443027	0.0232333
GeneID:107792414	13.8	17.35	16.49	4.98	4.98	6.16	-1.13877	2.28848e-06	2.40026e-05
GeneID:107783032	3	3.39	3.07	0.32	0.65	0.83	-1.92583	0.00988718	0.0462787
GeneID:107771601	0.99	1.23	1.25	0.42	0.26	0.56	-1.11677	0.00898006	0.0427146
GeneID:107799062	21.31	16.66	19.04	1.64	3.3	3.12	-2.37978	3.79707e-23	1.7849e-21
GeneID:107791757	36.08	39.16	38.29	10.38	11.76	13.17	-1.30436	8.41746e-30	5.96676e-28
GeneID:107771019	33.69	33.34	27.36	7.55	9.3	10.01	-1.42825	4.75724e-19	1.75788e-17
GeneID:107800454	7.49	5.4	5.5	1.78	1.92	2.93	-1.07276	0.00142294	0.00859848
GeneID:107773419	3.67	5.45	3.32	0.14	0.88	0.44	-2.70735	3.54035e-07	4.19675e-06
GeneID:107799015	1.21	1.45	1.28	0.45	0.31	0.47	-1.29394	0.00205148	0.0119105
novel.3550	218.89	40.08	52.7	2.34	19.02	4.22	-3.29121	0.00258666	0.0146036
GeneID:107827339	8.63	3.7	2.36	0.54	0.21	0.13	-3.67765	1.05376e-05	9.94211e-05
GeneID:107772596	67.6	71.61	53.55	24.21	22.7	25.71	-1.03343	1.52498e-14	3.9661e-13
GeneID:107805498	4.04	4.74	5.17	1.07	1.56	1.48	-1.37765	2.38298e-06	2.4942e-05
GeneID:107770060	6.1	5.87	4.31	0.56	0.56	1.36	-2.22878	0.000793637	0.00512748
GeneID:107811153	10.13	8.64	10.5	2.31	3.98	4.18	-1.04687	0.00167131	0.00992104
GeneID:107774955	6.28	7.29	6.05	1.62	1.6	2.52	-1.38567	1.13028e-06	1.24585e-05
GeneID:107773464	9.56	8.34	5.93	0.86	3.14	1.62	-1.59339	0.00200491	0.0116733
GeneID:107779518	676.86	674.08	551.67	161.35	169.63	168.64	-1.53143	3.61675e-44	4.78806e-42
GeneID:107797865	12.12	11.68	13.84	3.57	3.8	1.96	-1.53467	2.76105e-05	0.000242368
GeneID:107772363	13.26	16.84	9.78	3.33	3.92	3.82	-1.46179	2.82833e-09	4.41393e-08
GeneID:107822270	34.78	33.7	34.47	13.97	12.17	12.01	-1.01795	1.60841e-10	2.88092e-09
GeneID:107805943	2.06	2.27	2.25	0.75	0.61	1.13	-1.02088	0.00988454	0.0462707
novel.22242	28.77	29.5	34.38	4.62	10	9.94	-1.52598	3.57572e-13	8.29984e-12
GeneID:107766751	2.15	2.3	2.26	0.68	0.91	0.83	-1.10717	2.95198e-05	0.000257871
novel.11107	7.49	9.04	6.08	2.85	2.27	1.9	-1.27242	7.51462e-05	0.000608981
GeneID:107759039	56.77	57.11	52.82	21.74	20.78	18.27	-1.08507	2.20296e-21	9.27506e-20
GeneID:107791488	6.8	4.51	6.56	1.07	3.15	2.22	-1.08983	0.00126614	0.00775691
novel.15021	2.91	2.12	1.75	0.76	0.53	0.27	-1.73314	8.56352e-05	0.000686048
GeneID:107762315	8.54	9.71	7.17	1.76	2.33	2.72	-1.50046	4.85925e-07	5.66302e-06
GeneID:107812926	61.43	56.72	58.23	15.7	20.61	22.55	-1.1317	3.63957e-18	1.26701e-16
GeneID:107773627	2.13	2.12	1.86	0.42	0.2	0.46	-2.0995	0.000375688	0.00262238
GeneID:107781534	10.42	10.46	10.35	2.61	3.5	3.41	-1.34645	2.29923e-15	6.41431e-14
GeneID:107773755	37.02	34.26	37.52	12.44	10.58	13.95	-1.15509	1.95041e-14	5.01923e-13
GeneID:107803837	0.58	0.55	0.27	0.1	0.11	0.16	-1.55364	0.0103449	0.0480644
GeneID:107827379	20.35	15.87	16.86	3.34	5.43	3.16	-1.49314	0.00462846	0.0241497
GeneID:107766657	131.39	141.31	109.07	25.12	32.24	35.9	-1.63456	1.17002e-29	8.18508e-28
GeneID:107763513	4.86	5.19	4.09	1.37	1.24	1.21	-1.50402	6.90422e-08	9.0523e-07
GeneID:107789068	0.72	0.96	0.66	0.05	0.06	0.29	-2.18632	0.00134647	0.0081973
GeneID:107805628	3.24	2.22	1.9	0.1	0.11	0.34	-3.31056	0.000206219	0.00152963
GeneID:107804620	2.67	2.32	3.43	0.99	0.78	1.04	-1.20803	2.54196e-05	0.000224386
GeneID:107786718	0.9	1.69	2.59	0.17	0.25	0.06	-3.00955	8.35818e-05	0.000671196
GeneID:107819171	0.67	0.8	0.85	0.42	0.22	0.22	-1.0471	0.00623363	0.0312419
GeneID:107817881	8.32	7.62	6.77	2.23	2.6	2.43	-1.25342	2.20253e-06	2.31782e-05
novel.630	69.73	61.21	82.18	0	0	4.43	-5.08981	0.0098581	0.0461726
GeneID:107825752	59.24	53.16	64.09	7.31	11.67	13.5	-2.01569	4.06045e-27	2.44106e-25
novel.5082	5.71	4.78	5.26	0.93	1.36	1.92	-1.49371	0.000240078	0.00175646
GeneID:107768319	3.33	4.21	3.68	1.07	1.07	1.94	-1.08628	0.000431144	0.00296394
GeneID:107817960	9.71	9.8	8.9	3	1.93	1.72	-1.64885	0.000121996	0.000946502
GeneID:107829087	13.7	11.56	14.23	2.94	3.37	5.82	-1.17215	1.62689e-07	2.02314e-06
GeneID:107819250	0.66	1.04	0.88	0	0	0.11	-4.18447	0.00648299	0.0323054
GeneID:107793454	14.5	17.62	12.91	4.16	6.16	4.8	-1.23472	8.44467e-06	8.09619e-05
GeneID:107762468	177.56	173.81	190.9	59.93	68.04	73.76	-1.05057	8.0838e-31	6.05852e-29
GeneID:107795565	47.54	47.46	48.11	13.97	19.66	21.33	-1.01265	5.40219e-15	1.45014e-13
GeneID:107772240	4	3.52	3.64	0.95	0.98	1.25	-1.4389	9.53158e-08	1.22519e-06
novel.18547	3.79	3.5	3.98	0.23	0.58	1.6	-1.83126	0.00057407	0.00384025
GeneID:107806078	21.01	18.85	18.89	5.02	4.91	5.34	-1.54492	4.92249e-16	1.46308e-14
GeneID:107823768	151.86	146.83	124.97	48.23	50	59.76	-1.05055	4.37585e-19	1.62289e-17
GeneID:107820991	1.92	2.24	1.91	0.3	0.38	0.68	-1.81066	0.000385921	0.00268675
novel.18931	7.17	7.77	7.39	0.93	1.11	2.33	-1.87688	2.95753e-08	4.07026e-07
novel.5828	26.87	26	19.84	1.84	0.84	0.49	-4.05745	4.32197e-27	2.58903e-25
GeneID:107820832	102.96	92.53	70.2	33.97	29.56	31.24	-1.07696	6.16906e-12	1.27839e-10
novel.14738	1.79	2.63	3.44	0.17	0.63	0.91	-1.78926	0.00414693	0.0219437
GeneID:107820838	105.61	114.25	91.16	28.77	27.1	35.85	-1.38995	5.96403e-27	3.5474e-25
GeneID:107820233	22.54	16.82	20.25	4.85	5.31	7.73	-1.28969	1.35954e-06	1.47852e-05
GeneID:107800767	1.51	0.54	0.45	0.1	0	0	-4.13257	0.00884412	0.0421554
GeneID:107781100	1.4	1.84	1.33	0.35	0.36	0.36	-1.75487	2.30619e-05	0.000205226
GeneID:107777359	18.27	16.67	11.15	0.27	0.65	0.85	-3.7764	5.96263e-18	2.0557e-16
GeneID:107819092	1.91	2.22	1.44	0.28	0.49	0.31	-1.99975	3.51295e-06	3.57742e-05
novel.27370	54	42.6	53.46	8.98	6.94	7.99	-2.01288	7.71046e-09	1.13782e-07
GeneID:107799580	3.49	3.32	3.77	0.89	1.11	1.32	-1.2922	5.40834e-05	0.000449928
GeneID:107775805	2.87	2.53	3.29	0.66	0.87	1.11	-1.34724	1.14999e-06	1.26648e-05
GeneID:107800910	208.09	209.82	190.99	82.82	76.11	71.54	-1.0248	1.11593e-21	4.78218e-20
GeneID:107810567	1.06	0.73	0.56	0.14	0.18	0.37	-1.45986	0.00624058	0.0312623
GeneID:107779117	3.44	0.42	1.19	0.1	0	0	-5.07485	0.00051253	0.00346814
GeneID:107789540	111.88	96.93	91.52	17.94	20.73	29.47	-1.74907	1.61097e-29	1.11922e-27
novel.25825	1.7	1.5	2.26	0.76	0.58	0.71	-1.02785	0.00262082	0.0147667
GeneID:107822257	133.01	127.73	124.64	48.01	44.39	47.95	-1.05033	3.37176e-22	1.48791e-20
GeneID:107792428	25.95	30.67	17.45	1.22	2.93	3.55	-2.63807	4.21495e-07	4.94864e-06
GeneID:107802214	128.49	129.34	110.69	43.53	44.13	47.84	-1.07214	2.01197e-23	9.61e-22
GeneID:107812112	3.96	4.88	3.82	0.64	1.46	2.1	-1.20623	0.00316132	0.0173622
GeneID:107806253	1.31	2.07	2.71	0.76	0.47	0.42	-1.47543	0.00323204	0.0176908
GeneID:107770117	14.33	12.13	14.03	4.28	4.83	4.94	-1.1265	9.8397e-08	1.26254e-06
GeneID:107814930	372.76	330.56	283.71	116.35	121.94	127.23	-1.02532	4.99039e-18	1.72759e-16
GeneID:107817901	0.97	1.11	0.94	0.24	0.35	0.26	-1.43478	0.000805243	0.00519182
GeneID:107782341	6.91	5.85	11.06	0.85	2.12	3.75	-1.3978	0.00133487	0.0081316
novel.2704	3.5	4.66	2.08	0.86	0.17	0.18	-2.58841	0.00307944	0.0169827
GeneID:107767727	30.91	35.96	53.28	7.89	11.86	11.7	-1.55012	1.71437e-18	6.07242e-17
novel.14249	7.97	8.14	8.17	2.38	2.7	3.29	-1.16019	1.81879e-08	2.57546e-07
GeneID:107797523	123.71	127.74	126.01	43.9	40.13	45.88	-1.16524	1.61259e-33	1.39516e-31
GeneID:107810556	2.17	2.1	2.99	0.64	0.61	1.41	-1.0703	0.0105685	0.0489274
GeneID:107824840	3.57	5.24	3.87	1.36	1.41	1.62	-1.13231	0.00157535	0.00941015
GeneID:107832708	26.32	26.6	25.52	8.24	7.97	9.91	-1.21066	1.54032e-21	6.53973e-20
GeneID:107794965	0.26	0.28	0.23	0.02	0.03	0.03	-3.48192	0.00994399	0.046523
GeneID:107818091	11.46	11.35	11.84	2.37	3.29	3.31	-1.5876	6.17793e-18	2.12557e-16
GeneID:107779815	40.43	34.06	32.4	10.29	11.79	11.57	-1.25935	2.25091e-13	5.32522e-12
novel.9699	2.18	1.68	1.66	0.74	0.54	0.57	-1.20662	3.9998e-07	4.7071e-06
novel.14037	13.81	19.22	20.18	0.96	0	0.83	-4.2773	0.000553875	0.00371748
GeneID:107781099	7.7	7.43	8.58	2.07	2.3	2.87	-1.30616	8.43284e-06	8.08793e-05
GeneID:107779383	1.87	2.3	1.93	0.85	0.63	0.85	-1.0353	0.00520006	0.0267229
GeneID:107776034	2.74	2.99	2.46	0.81	0.89	1.16	-1.14187	0.000163718	0.00124121
GeneID:107814673	7.59	6.54	6.89	2.07	1.36	2.72	-1.39684	2.6182e-08	3.628e-07
GeneID:107765821	10.87	11.08	12.75	0.46	1.07	1.66	-3.05218	6.47964e-18	2.22482e-16
GeneID:107762023	63.54	62.08	74.73	17.28	19.18	20.59	-1.41535	4.61743e-31	3.49697e-29
novel.19241	19.99	17.93	15.11	2.99	3.37	4.51	-1.90899	2.37488e-21	9.9822e-20
GeneID:107802386	16.41	19.13	20.3	4.83	3.13	5.12	-1.53776	0.000173983	0.00131174
GeneID:107791382	43.42	44.64	44.22	17.4	15.24	16.15	-1.04915	3.2288e-17	1.05546e-15
novel.14417	102.25	85.9	93.27	30.96	34.06	38.75	-1.05279	8.23695e-20	3.17876e-18
GeneID:107798288	1.8	1.93	1.57	0.37	0.63	0.35	-1.58288	0.00373908	0.020089
GeneID:107771022	28.92	31.87	25.95	8.85	9.84	9.95	-1.23283	5.0212e-23	2.34939e-21
GeneID:107777673	10.06	8.57	9.45	3.25	3.01	3.39	-1.1775	2.38381e-15	6.63192e-14
GeneID:107805622	11.48	9.99	15.66	2.41	2.05	4.05	-1.58441	0.00106684	0.00665475
novel.24137	12.39	7.26	15.82	3.09	3.41	3.3	-1.45088	1.01344e-07	1.29936e-06
novel.18116	1.85	1.92	0.84	0.58	0.39	0.29	-1.4823	0.00850993	0.0408481
GeneID:107770940	0.37	0.4	0.11	0	0	0	-5.19544	0.00105135	0.00656788
GeneID:107798073	294.61	321.21	312.61	100.85	113.75	125.32	-1.04495	3.89515e-27	2.34728e-25
novel.7155	2.79	1.72	1.55	0.41	0	0.09	-3.16148	0.000277296	0.00199893
GeneID:107817555	4.19	4.87	3.43	1.36	1.29	1.14	-1.43737	0.000925971	0.00588595
novel.20762	0.61	0.26	0.62	0	0.05	0	-5.04238	0.00171462	0.0101495
GeneID:107770659	83.8	91.58	57.97	21.74	24.22	23.19	-1.39537	7.28616e-21	2.99029e-19
GeneID:107765506	15.08	11.58	16.73	4.07	5.96	4.25	-1.20686	4.56582e-08	6.12651e-07
GeneID:107800711	13.82	13.95	10.64	4.09	3.65	5.8	-1.18308	7.5878e-08	9.89455e-07
novel.22493	3.49	3.61	3.34	0.39	0	0	-4.26822	1.24712e-07	1.57416e-06
GeneID:107798304	9.13	11.83	10.74	2.73	3.38	2.45	-1.46353	1.08077e-06	1.19546e-05
novel.18561	28.42	23.19	25	4.34	13.34	8.33	-1.20711	0.00460925	0.0240743
GeneID:107824112	21.85	23.27	18.86	4.66	4.5	5.06	-1.76315	2.76399e-17	9.10524e-16
GeneID:107802883	4.41	1.74	1.79	0.77	0	0.39	-2.41798	0.000556843	0.00373591
GeneID:107785540	2.3	2.1	2.69	1.01	0.89	0.61	-1.10159	0.00721631	0.0354656
GeneID:107802832	1.69	1.74	1.56	0.75	0.33	0.17	-1.57873	0.0025073	0.0142112
GeneID:107803548	3.44	3.77	4.71	0.81	1.16	0.29	-1.98874	2.18085e-05	0.000194897
GeneID:107781478	0.47	0.48	0.61	0.13	0.16	0.22	-1.29414	0.00165132	0.00981164
novel.27666	1.17	1.75	1.58	0.12	0.26	0.56	-1.90609	0.000803534	0.00518279
GeneID:107782344	134.28	129.86	131.53	33.99	38.05	37.22	-1.47002	8.33908e-52	1.421e-49
GeneID:107790347	37.54	43.6	44.29	13.69	16.7	14.72	-1.10868	1.12731e-23	5.48315e-22
novel.15665	1.58	2.91	1.43	0.33	0.5	0.44	-1.81767	0.00329442	0.0179835
GeneID:107802249	5.01	4.35	5.38	1.9	1.7	1.46	-1.12518	0.00266441	0.0149789
novel.21776	3.01	3.71	2.32	0.83	0.3	0.38	-2.15709	9.28352e-05	0.000738683
GeneID:107759904	5.24	5.69	5	1.43	1.81	1.7	-1.32702	3.68878e-09	5.67251e-08
novel.15671	4.23	3.27	4.16	0.58	1.74	1.14	-1.33197	0.0077517	0.0376856
novel.8782	2.93	3.23	2.46	1.09	0.75	0.75	-1.32725	0.00229695	0.013158
novel.13207	34.13	27.86	47.58	13.14	7.39	5.87	-1.44751	0.000131668	0.00101548
GeneID:107802629	0.17	0.18	0.08	0	0	0	-4.69652	0.00570446	0.0289814
GeneID:107781404	4.11	4.03	2.96	1.14	1.33	1.21	-1.24052	4.34722e-10	7.4734e-09
novel.13409	6.09	6.7	5.23	2.49	1.75	1.31	-1.27338	0.000604049	0.00402107
GeneID:107778511	2.75	3.37	3.22	1.27	1.35	0.98	-1.00025	0.000271072	0.0019577
GeneID:107778164	7.55	5.77	4.44	1.01	1.05	1.87	-1.79427	3.19211e-07	3.80721e-06
GeneID:107778614	8.11	8.55	7.62	0.96	1.71	1.64	-2.08801	2.73246e-09	4.26828e-08
GeneID:107794502	1.98	4.13	1.9	0.42	0.11	0.51	-2.6071	6.27109e-06	6.13712e-05
novel.17059	18.19	5.91	28.88	3.41	0	2.49	-2.70775	0.00103148	0.00645973
GeneID:107778599	8.79	9.86	9.19	3.68	4.02	4.72	-1.11046	2.16654e-09	3.43427e-08
GeneID:107795726	3.05	1.83	3.51	0.38	0.63	0.85	-1.8435	6.37135e-05	0.000523054
GeneID:107830130	231.5	209.36	251.95	79.03	91.16	80.88	-1.05538	1.39123e-25	7.68589e-24
GeneID:107772427	0.35	0.19	0.26	0	0	0	-4.55146	0.00874726	0.0417885
novel.27066	7.07	6.23	6.3	0.91	1.22	2.13	-1.84044	8.94529e-10	1.48859e-08
GeneID:107786115	3.68	2.51	3.53	1.11	1.05	1.09	-1.19353	0.000407828	0.0028198
GeneID:107781799	0.47	0.6	0.51	0.16	0.19	0.06	-1.56844	0.00730185	0.0358301
GeneID:107812155	5.24	5.88	3.97	1.46	2.13	1.77	-1.12543	1.0847e-05	0.000102226
novel.9186	65.5	68.72	77.61	22.48	27.92	26.66	-1.08898	2.56746e-27	1.5659e-25
GeneID:107817468	3.03	2.77	3.25	0.65	1.35	1.07	-1.20811	2.49141e-05	0.000220348
GeneID:107818750	4.74	3.25	2.35	0.77	1	0.37	-1.85222	0.000796208	0.00514277
novel.4901	1.87	1.49	0.97	0	0	0.17	-4.94974	0.00232379	0.0132966
GeneID:107825033	29.49	31.05	36.47	6.14	7.01	12.05	-1.54847	2.53426e-14	6.46489e-13
novel.12780	30.09	26.93	34.85	5.71	7.86	9.11	-1.64784	6.06693e-28	3.84918e-26
GeneID:107782490	19.28	22.64	16.98	6.5	5.38	8.87	-1.10556	1.06616e-08	1.55064e-07
GeneID:107777309	17.16	17.53	19.29	4.77	6.97	6.47	-1.12515	8.93027e-06	8.5261e-05
GeneID:107761554	3.59	4.86	4.53	1.88	1.22	1.45	-1.10868	0.000881852	0.00562521
GeneID:107821180	6.74	6.66	5.34	0.55	1.07	1.87	-2.00638	5.47443e-06	5.41952e-05
GeneID:107776006	1.3	2.61	1.91	0.5	0.73	0.77	-1.16354	0.010097	0.0471166
GeneID:107805365	2.97	3.8	2.89	0.81	0.76	0.58	-1.73903	0.0012547	0.00769243
GeneID:107760609	1.92	1.03	0.65	0	0	0	-6.68585	7.4449e-07	8.42336e-06
GeneID:107830203	39.19	41.25	37.06	13.02	14.87	14.47	-1.11347	1.10523e-28	7.34473e-27
GeneID:107813398	31.77	34.6	33.13	11.91	9.6	12.78	-1.15394	8.15212e-17	2.58444e-15
GeneID:107799308	0.38	0.24	0.7	0.1	0	0	-3.17426	0.00937478	0.0442831
novel.24461	2.61	2.49	2.57	0.5	0.54	0.91	-1.58805	0.000668721	0.00440277
GeneID:107786839	3844.18	3745.24	2871.47	720.08	695.11	856.62	-1.76941	8.06529e-45	1.09356e-42
GeneID:107808374	13.34	12.39	14.1	4.26	4.39	4.01	-1.27298	4.30621e-14	1.08546e-12
GeneID:107760213	8.58	8.9	7.03	2.48	3.18	3.09	-1.12363	2.95439e-09	4.59786e-08
GeneID:107808089	14.7	10.31	16.59	4.07	4.52	5.18	-1.17074	1.04959e-05	9.91016e-05
GeneID:107801759	1.44	1.92	1.48	0.66	0.39	0.52	-1.18874	0.00574047	0.0291409
GeneID:107776261	6.62	5.84	9.49	1.01	0.63	1.33	-2.31373	0.00276808	0.0154995
GeneID:107822971	1.43	0.9	1.05	0.37	0.45	0.47	-1.06431	0.00898402	0.0427294
novel.24161	4.51	3.93	3.25	1.21	1.44	0.97	-1.28877	0.00109084	0.00678684
novel.24921	1.42	1.14	1.48	0.22	0.35	0.41	-1.6516	0.00896367	0.0426447
GeneID:107765110	33.67	33.4	29.38	7.28	8.57	7.54	-1.60612	6.61061e-15	1.76419e-13
GeneID:107806706	2.55	2.37	1.88	0.58	0.8	1.18	-1.0594	0.0081574	0.0393813
GeneID:107761776	22.18	20.87	19.16	6.6	7.61	9.11	-1.03949	1.81592e-11	3.59612e-10
GeneID:107787598	4.22	4.25	4.05	1.04	1.38	1.19	-1.4233	9.52751e-08	1.22498e-06
GeneID:107771715	33.37	32.71	32.51	5.97	9.25	14.95	-1.31918	1.97551e-15	5.56042e-14
GeneID:107830824	10.92	8.67	9.05	2.4	2.75	3.38	-1.3513	6.07598e-06	5.96702e-05
novel.18902	16.16	16.36	4.59	0	1.43	0	-3.94514	0.00312469	0.0171947
GeneID:107775007	2.19	2.69	1.43	0.65	0.5	0.61	-1.45645	0.000533636	0.003596
GeneID:107814370	106.29	97.4	98.37	30.34	27.41	32.14	-1.33141	2.50808e-27	1.53525e-25
GeneID:107767924	12.39	11.54	10.36	3.28	4.08	4.09	-1.19765	6.11417e-09	9.14027e-08
GeneID:107786877	1045.59	1059.97	880.25	296.12	304.06	323.9	-1.31451	2.67596e-36	2.61575e-34
GeneID:107803162	1.13	1.22	1.5	0.19	0.59	0.27	-1.50961	0.000993885	0.00626319
GeneID:107797998	17.38	14.97	12.22	2.89	6.43	6.22	-1.10317	0.000163814	0.00124175
GeneID:107801123	3.71	4.73	3.64	0.8	1.73	0.53	-1.50347	0.000274219	0.00197873
GeneID:107809758	2.6	3.08	2.74	0.43	0.47	0.56	-1.8823	0.00137179	0.00833031
GeneID:107763425	1.73	1.46	2.19	0.57	0.52	0.52	-1.34805	0.000311651	0.00221493
GeneID:107794654	70.34	75.37	83.83	22.43	22.76	22.43	-1.37296	6.64857e-37	6.65372e-35
GeneID:107813138	18.08	17.53	22.3	4.45	5.58	5.75	-1.50411	6.80475e-19	2.48354e-17
GeneID:107797660	28.1	27.64	19.85	2.25	3.2	5.59	-2.17488	3.04999e-15	8.41108e-14
GeneID:107764729	143.43	148.32	151.3	35.7	40.48	45.78	-1.47855	1.85545e-48	2.79365e-46
GeneID:107817968	15.55	15.3	15.85	2.18	1.46	2.65	-2.40454	1.55638e-09	2.50966e-08
GeneID:107760448	2.12	1.07	0.3	0	0	0	-5.75519	0.000134556	0.00103632
GeneID:107823996	16.69	18.87	14.01	4.89	6.55	6.4	-1.1085	3.62596e-11	6.94871e-10
GeneID:107773903	5.98	6.48	6.4	1.67	2.08	1.73	-1.41478	1.46902e-11	2.93915e-10
GeneID:107782225	77.69	70.43	53.9	10.5	8	12.18	-2.31702	2.92938e-36	2.85793e-34
GeneID:107798789	0.88	1.46	0.51	0.12	0.07	0.07	-3.0699	0.00318824	0.0174909
GeneID:107805884	2.35	2.84	3.04	1.03	1.18	0.89	-1.01492	0.00625019	0.0313
GeneID:107778283	20.7	21.78	21.63	2.95	7.47	7.38	-1.43143	8.85155e-08	1.14302e-06
novel.21032	6.33	6.43	8.26	2.05	2.28	2.9	-1.12961	0.000416621	0.00287429
GeneID:107825712	0.17	0.23	0.08	0	0	0	-4.61633	0.00805313	0.0389446
GeneID:107787291	0.79	1.16	0.78	0.26	0.43	0.26	-1.1547	0.00218954	0.0126114
novel.3826	25.96	56.7	38.07	0	0	0	-4.83841	0.00352194	0.0190461
GeneID:107813330	5.26	5.32	5.59	0.82	1.62	1.32	-1.735	3.65651e-10	6.33348e-09
GeneID:107806542	12.12	11.63	11.17	2.61	5.05	4.18	-1.18738	5.29518e-07	6.13703e-06
GeneID:107808555	16.12	17.22	15.49	5.52	6.45	6.54	-1.03441	1.30275e-15	3.72924e-14
novel.16979	2.76	2.52	2.49	0.6	0.94	0.11	-1.80229	0.00725044	0.035616
GeneID:107830909	1.31	1.06	0.99	0.44	0.38	0.38	-1.1161	0.00378519	0.0203043
GeneID:107820432	17.19	18.31	17.08	5.27	5.06	5.34	-1.36821	1.25399e-16	3.91884e-15
GeneID:107801122	40.71	39.29	40.56	11.11	15.09	16.58	-1.07609	2.40713e-10	4.23929e-09
GeneID:107787681	1.21	1.62	1.1	0.27	0.39	0.19	-1.82617	0.00250922	0.0142189
GeneID:107761411	3.33	3.74	5.25	0.67	1.7	1.65	-1.22686	0.00208395	0.0120722
novel.26046	4.47	3.86	3.08	0.89	1.9	0.61	-1.33684	0.00555411	0.0283059
GeneID:107824852	21.26	19.6	18.28	4.13	5.87	3.94	-1.65218	1.42187e-11	2.85047e-10
novel.7677	5.32	2.73	3.17	1.13	0.6	0.7	-1.78368	0.000453944	0.00310672
GeneID:107828257	0.81	1.24	0.89	0.09	0.1	0.39	-1.99001	0.0072646	0.0356751
GeneID:107795774	10.95	8.91	6.07	1.88	3.35	2.74	-1.31113	2.59309e-05	0.000228619
novel.24531	8.62	8.95	8.51	2.27	2.09	3.2	-1.34541	1.16234e-06	1.27896e-05
GeneID:107791045	7.64	8.15	7.01	2.64	2.46	3.05	-1.11611	6.00674e-09	8.99032e-08
GeneID:107832258	85.87	90.56	82.58	21.29	24.22	27.2	-1.34346	5.62911e-27	3.36008e-25
GeneID:107777564	16.05	18.39	17.04	4.81	6.75	7.12	-1.08452	4.14145e-10	7.12937e-09
GeneID:107778409	593.33	632.53	497.14	166.95	155.79	147.62	-1.50831	1.18224e-37	1.21696e-35
GeneID:107795834	21.21	16.04	18.66	3.5	5.78	6.29	-1.40422	3.656e-07	4.32267e-06
GeneID:107780675	6.7	6.44	10.1	2.4	2.25	3.87	-1.02546	0.00287194	0.0160064
GeneID:107790104	8.52	9.51	6.2	1.69	3.44	3.87	-1.07474	0.00299201	0.0165748
GeneID:107827108	1.26	2.42	1.47	0.03	0.15	0.08	-3.9371	2.938e-08	4.04559e-07
GeneID:107825507	14.75	14.05	14.02	2.82	4.73	4.99	-1.37485	2.52294e-11	4.92471e-10
GeneID:107830332	6.7	7.07	7.46	1.66	2.01	1.43	-1.58656	0.000579462	0.00387067
GeneID:107812036	3.42	3.28	3.06	1.41	1.26	1.07	-1.02519	0.000123083	0.000954077
GeneID:107825901	1.82	1.67	2.08	0.62	0.69	0.74	-1.0732	0.000108179	0.000848987
GeneID:107794250	1.38	1.37	1.59	0.48	0.37	0.28	-1.55932	0.000388992	0.00270402
GeneID:107827125	172.4	162.68	136.76	48.61	42.07	45.67	-1.4176	4.03625e-31	3.06603e-29
GeneID:107795850	14.02	13.84	13.9	2.9	2.98	3.15	-1.83603	7.17498e-31	5.40147e-29
GeneID:107792544	6.89	7.17	7.02	1.54	2.43	1.78	-1.49934	9.99953e-14	2.44364e-12
novel.25903	2.25	2.52	3.1	0.49	0.7	1.06	-1.40668	0.009737	0.0456733
GeneID:107832401	0.3	0.1	0.2	0	0	0	-4.54513	0.00964397	0.0453085
GeneID:107781547	0.96	1.53	0.92	0.19	0.3	0.13	-2.07288	0.00120394	0.00741376
GeneID:107783125	2.77	3.61	3.78	0.84	1.55	0.99	-1.00062	0.0013414	0.0081684
GeneID:107786130	53.9	49.22	53	16.39	14.65	17.77	-1.28202	7.46936e-23	3.45957e-21
GeneID:107762442	3.39	2.17	5.2	0.45	0.92	0.98	-1.80787	3.08722e-05	0.000268662
GeneID:107816447	25.08	25.45	28.68	6.85	8.85	10.8	-1.22302	1.19272e-18	4.27575e-17
GeneID:107768063	12.55	12.69	10.04	3.9	3.93	5.43	-1.05171	1.62627e-10	2.91188e-09
GeneID:107827764	2.06	2.05	1.57	0.64	0.45	0.12	-1.9281	0.000614873	0.00408396
GeneID:107807243	16.1	7.55	3.74	0.31	0.06	0.06	-5.6012	2.55965e-08	3.5537e-07
novel.13354	3.6	8.1	6.74	0	0	0.35	-5.53807	1.15202e-06	1.26843e-05
GeneID:107809307	1.53	0.8	1.42	0.3	0.56	0.43	-1.19484	0.00510701	0.0263048
GeneID:107776790	3.28	3.23	2.73	1.11	0.79	1.64	-1.00022	0.00553723	0.0282342
GeneID:107772653	29.79	31.61	31.06	8.87	7.76	8.46	-1.44677	7.39549e-13	1.66131e-11
GeneID:107832171	231.58	211.89	186.13	19.14	36.63	35.88	-2.34537	5.56064e-15	1.48998e-13
GeneID:107829149	9.79	7.97	10.67	1.72	2.85	2.73	-1.56631	2.81291e-08	3.88713e-07
GeneID:107783358	0.38	0.46	0.26	0.07	0.08	0.16	-1.60261	0.00565377	0.0287499
novel.2348	4.85	4.27	4.16	1.12	1.49	2.01	-1.12576	0.00225515	0.0129531
GeneID:107775858	9.66	10.93	10.35	2.48	1.44	0.64	-2.2994	1.18903e-05	0.000111434
GeneID:107803414	34.04	42.27	28.83	11.28	9.59	12.16	-1.30212	3.33988e-17	1.08965e-15
GeneID:107804268	36.82	36.85	33.15	8.01	10.74	8.27	-1.59723	1.10021e-25	6.1116e-24
novel.19497	28.39	27.68	19.86	7.44	8.55	5.98	-1.31461	1.42252e-06	1.5407e-05
GeneID:107776942	99.61	107.62	90.67	31.95	31.17	40.88	-1.15236	1.43503e-21	6.103e-20
GeneID:107795717	87.36	79.2	72.16	14.12	16.59	19.41	-1.81425	1.24178e-28	8.2305e-27
GeneID:107777326	2.28	2.01	2.4	0.8	0.92	0.77	-1.03923	0.00398955	0.0212334
GeneID:107777751	1542.87	1397.55	1200.5	365.07	431.69	443.46	-1.24889	4.53644e-25	2.40603e-23
GeneID:107821962	10.53	10.31	11.03	3.42	3.67	4.94	-1.03975	9.05485e-11	1.66929e-09
GeneID:107778766	2.5	1.97	2.11	0.19	0.51	0.46	-2.13434	3.16278e-05	0.000274527
novel.24011	6.35	9.09	4.89	0.18	1.02	1.14	-2.82345	3.36365e-07	3.99762e-06
GeneID:107778109	0.42	0.49	0.34	0.06	0.03	0	-3.3726	0.00293659	0.0163126
GeneID:107767110	12.92	13.58	10.41	4.21	4.92	4.81	-1.16204	0.0001172	0.000912398
GeneID:107773595	3.35	3.2	3.63	1.3	1.22	1.37	-1.00886	0.00018325	0.0013736
GeneID:107766655	22.74	22.99	30.17	8.99	10.46	9.52	-1.00879	7.83257e-13	1.75429e-11
GeneID:107798434	3.09	2.71	2.71	0.64	0.84	1.24	-1.24628	0.00901019	0.0428296
GeneID:107781648	0.97	0.57	0.62	0	0.12	0.16	-2.57587	0.00299096	0.0165708
GeneID:107806379	4.53	4.86	5.28	1.97	1.74	0.72	-1.32443	0.000106482	0.00083645
GeneID:107810217	5.11	5.15	5.7	1.32	1.54	1.65	-1.43438	9.68953e-07	1.08078e-05
GeneID:107800180	11.83	11.58	13.24	2.22	4.92	4.18	-1.28631	5.0549e-06	5.02987e-05
novel.26992	5.68	4.7	3.64	0.75	0.69	0.95	-2.16196	6.94725e-08	9.10398e-07
GeneID:107785753	306.44	293.66	263.82	77.37	76.14	83.59	-1.49445	7.72012e-49	1.17642e-46
GeneID:107760559	18.67	17.05	16.93	6.35	5.73	5.34	-1.20874	6.55303e-14	1.62419e-12
novel.98	20.43	20.66	19.1	3.58	3.74	4.37	-1.96404	2.35772e-22	1.05054e-20
GeneID:107806770	4.18	2.81	2.9	0.28	0.73	0.15	-2.62338	0.000939937	0.00596196
novel.11919	3.22	2.75	2.43	0.49	0.87	0.35	-1.88203	0.0010221	0.00640837
GeneID:107782331	538.41	627.84	442.31	159.14	155.51	154.45	-1.33757	3.97244e-25	2.12027e-23
GeneID:107782158	88.94	92.97	92.61	45.32	34.92	30.97	-1.43344	4.33508e-38	4.56487e-36
novel.17069	1.6	1.6	1.69	0.14	0.08	0.39	-2.61711	0.00087738	0.0056018
GeneID:107773377	2.82	2.82	3.08	0.15	0.37	0.27	-3.08812	6.17229e-09	9.21895e-08
novel.25342	2.84	2.85	2.74	0.74	0.91	0.96	-1.30575	0.000688695	0.00451835
novel.5138	6.12	5.47	7.02	0.67	0.85	1.45	-2.30368	3.69114e-08	5.01151e-07
GeneID:107801744	23.84	27.62	12.98	0.56	1.68	3.52	-2.78013	2.60719e-05	0.000229741
GeneID:107794544	2.93	2.98	2.37	0.98	0.89	1.01	-1.15982	1.38423e-06	1.50278e-05
GeneID:107810247	14.25	10.42	7.83	2.38	2.98	1.77	-1.74647	3.46268e-06	3.53194e-05
GeneID:107822344	446.92	417.57	438.18	141.14	123.49	130.3	-1.27665	1.1862e-39	1.33551e-37
GeneID:107781403	114.98	116.65	112.56	41.1	39.99	39.95	-1.14211	7.04161e-36	6.7395e-34
novel.22588	93.49	107.87	78.61	36.04	33.53	33.96	-1.06154	3.87206e-16	1.15769e-14
GeneID:107808530	1.27	1.27	1.39	0.32	0.43	0.48	-1.31997	0.000855802	0.00548346
GeneID:107826314	18.86	20.85	16.84	6.99	4.92	6.58	-1.10367	5.89515e-12	1.22415e-10
GeneID:107818788	8.79	7.91	9.78	0.32	0.65	0.33	-3.87118	2.63624e-09	4.12586e-08
novel.23324	3.73	3.61	3.19	0.71	0.3	0.78	-2.1575	1.41998e-06	1.53861e-05
GeneID:107819927	1.35	1.19	1.51	0.18	0.39	0.33	-1.77314	0.00913926	0.0433288
GeneID:107780568	2.49	2.72	2.7	1.01	0.8	1.13	-1.05983	8.35587e-05	0.000671117
GeneID:107784687	1.14	1.48	2.19	0.24	0.8	0.6	-1.184	0.00932112	0.0440646
GeneID:107797755	16.47	21.97	17.39	2.04	2.79	2.83	-2.17505	2.67825e-10	4.70199e-09
GeneID:107773448	50.64	50.18	50.07	15.96	19.1	17.99	-1.13787	7.95844e-28	5.02398e-26
GeneID:107766679	1.53	1.09	1.66	0.19	0.58	0.46	-1.43849	0.000464527	0.00317269
GeneID:107758961	5.98	5.4	5.84	2.09	1.63	2.35	-1.13376	1.79512e-06	1.91465e-05
GeneID:107788261	46.09	41.13	37.63	8.11	11.46	9.54	-1.69109	8.18943e-22	3.53956e-20
GeneID:107806944	8.43	10.32	10.6	1.91	2.85	2.51	-1.63893	1.1326e-11	2.29796e-10
GeneID:107800917	11.97	12.87	10.28	3.2	3.89	4.06	-1.29871	2.25184e-20	9.03585e-19
GeneID:107810581	2.19	2.69	2.33	0.93	0.75	0.86	-1.10452	0.00808039	0.0390539
GeneID:107791888	5.6	6.19	5.02	2.1	1.32	1.74	-1.26044	1.22591e-06	1.34275e-05
novel.24287	783.33	768.18	703.29	135.19	163.53	187	-1.74629	1.06985e-58	2.22066e-56
novel.2263	1.29	1.44	1.77	0.37	0.7	0.51	-1.34032	0.00270271	0.0151705
GeneID:107800790	9.8	8.86	9.64	3.16	2.82	3.4	-1.21072	8.36858e-10	1.39769e-08
GeneID:107829143	1.44	1.62	1.22	0.58	0.58	0.48	-1.02315	0.000164064	0.00124327
GeneID:107808039	81.14	77.7	85.48	25.3	25.91	31.42	-1.16564	2.32929e-23	1.10942e-21
GeneID:107761591	0.66	0.88	0.74	0	0	0	-4.56385	0.00816328	0.0394017
GeneID:107800697	2.86	2.93	3	0.53	0.74	0.32	-2.06695	3.71984e-06	3.77667e-05
GeneID:107778149	33.2	38.34	32.9	10.01	12.11	12.88	-1.16936	2.0323e-12	4.38064e-11
GeneID:107800217	0.81	0.24	0.15	0.1	0	0	-3.1496	0.00581431	0.0294505
GeneID:107821126	9.39	8.81	7.46	2.52	2.34	2.92	-1.35304	2.33369e-14	5.966e-13
GeneID:107801449	9.71	9.43	9.25	3.16	3.77	3.92	-1.07304	3.35736e-10	5.83737e-09
GeneID:107773960	3.68	3.48	4.61	0.34	0.67	0.8	-2.31812	1.08714e-07	1.38506e-06
GeneID:107784538	28.2	28.05	24.2	6.39	7.25	8.17	-1.48394	1.67406e-16	5.1581e-15
GeneID:107823031	3.71	3.89	2.91	1.21	1.5	1.27	-1.05234	6.72313e-11	1.25969e-09
GeneID:107804443	1.95	1.38	2.92	0.37	0.25	0.39	-2.1823	0.00947625	0.0446996
GeneID:107784170	1.84	1.63	2.05	0.71	0.62	0.66	-1.08749	0.00664523	0.0330147
novel.18635	5.4	4.71	7.51	1.6	1.87	2.06	-1.26128	0.000356761	0.00250433
GeneID:107815080	8.4	9.16	9.65	1.66	1.69	2.1	-1.92865	1.188e-13	2.88918e-12
GeneID:107774518	36.93	25.02	34.64	9.03	11.92	11.78	-1.10046	1.06727e-06	1.18157e-05
GeneID:107808768	26.17	27.38	21.58	9.11	6.72	8.68	-1.22971	6.77266e-13	1.52776e-11
GeneID:107809723	9.87	12.5	10.09	3.06	3.01	2.47	-1.41049	0.00142751	0.00862196
novel.3011	2.19	2.36	2	1.06	0.61	0.7	-1.09864	1.90337e-05	0.000171558
GeneID:107779254	30.57	26.36	30.33	5.46	7.4	7.28	-1.86173	3.59734e-42	4.43634e-40
novel.7512	2.17	1.59	3.58	0.12	0.65	0.27	-2.34368	0.00528882	0.0271349
GeneID:107795323	80.71	83.53	69.31	8.26	15.77	14.31	-2.17884	5.54012e-29	3.72584e-27
novel.1377	7.29	4.62	11.59	1.37	1.54	2.88	-1.56153	0.00267368	0.0150248
GeneID:107771865	3.02	2.56	2.73	0.54	1.02	0.81	-1.4152	0.00325894	0.0178264
GeneID:107780464	0.92	1.2	1.19	0.25	0.16	0.05	-2.39667	0.00188648	0.0110513
GeneID:107810969	16.78	15.96	16.76	3.97	5.22	5.51	-1.32842	5.19414e-08	6.92172e-07
GeneID:107804179	24.04	20.56	28.93	6.1	10.51	9.9	-1.0854	7.07161e-09	1.04846e-07
GeneID:107831188	3.33	2.11	2.64	1.17	0.65	0.45	-1.43735	0.000420769	0.00289961
novel.26323	3.42	7.51	2.25	0	0.29	0.31	-3.89594	0.00309227	0.0170423
GeneID:107810655	2.35	2.35	1.88	0.68	1.03	0.86	-1.01175	6.88846e-06	6.69842e-05
GeneID:107760551	0.88	1.18	0.76	0.28	0.34	0.21	-1.3892	0.000103025	0.000811318
GeneID:107799407	4.11	5.53	3.82	0.82	1.63	1.66	-1.28627	0.00653469	0.0325341
GeneID:107787113	24.35	23.69	18.3	5.59	6.47	7.26	-1.29855	2.12335e-09	3.37427e-08
GeneID:107775280	3.47	2.53	3.69	0.27	0.35	0.74	-2.46116	5.29312e-08	7.04061e-07
GeneID:107761938	3.17	1.86	2.69	0.4	0.56	0.14	-2.37576	0.00374688	0.0201288
GeneID:107792258	5.19	6.18	4.77	2.13	1.55	1.83	-1.1694	9.43114e-07	1.05336e-05
novel.16857	355.17	385.22	390.99	86.79	132.14	207.12	-1.02	0.00262841	0.0148012
GeneID:107769423	3.65	3.21	2.92	0.85	0.93	1.77	-1.08803	0.00259597	0.0146512
GeneID:107794458	26.72	21.13	23.73	6.56	8.6	10.73	-1.02604	1.26215e-05	0.000117609
GeneID:107762254	2882.15	3177.12	2507.32	851.05	862.73	855.53	-1.28931	7.9229e-33	6.62725e-31
GeneID:107769143	4.24	6.5	5.11	1.57	1.23	2.14	-1.26785	0.00124898	0.00765924
GeneID:107767971	2.68	3.87	2.8	0.58	1.09	0.78	-1.56472	3.59726e-06	3.66032e-05
GeneID:107760046	10.37	11.09	9.6	2.47	3.87	3.32	-1.2926	3.62821e-07	4.29366e-06
GeneID:107769964	2.36	3.09	2.79	0.67	1.07	0.74	-1.34887	0.000213012	0.00157423
novel.12863	84.94	83.44	71.06	22.69	25.08	25.03	-1.2756	1.74068e-22	7.83912e-21
GeneID:107829691	2.27	0.24	0.34	0.06	0	0	-5.06228	0.000728147	0.0047457
novel.15301	13.79	14.35	14.94	3.81	5.17	5.07	-1.22029	4.55946e-09	6.92286e-08
novel.10551	6.08	7.8	6.18	0.36	1.38	2.17	-1.9314	0.000100027	0.0007898
novel.7285	6.95	7.98	4.8	1.91	1.51	1.8	-1.5253	1.94928e-07	2.39863e-06
GeneID:107776097	338.2	328.65	404.54	86.37	129.76	127.82	-1.26177	1.98642e-24	1.00798e-22
novel.11341	898.39	348.04	573.43	80.05	247.79	152.96	-1.50801	0.00952394	0.0448658
GeneID:107793154	0.75	0.7	0.52	0.13	0.17	0.1	-2.06003	0.00039942	0.00276622
novel.6049	55.42	58.31	48.32	17.86	20.19	19.68	-1.09548	4.3098e-16	1.28476e-14
GeneID:107822028	23.77	22.88	27.75	5.31	4.19	5.03	-1.90864	3.23733e-15	8.91309e-14
GeneID:107797854	27.88	25.49	28.66	9.59	8.59	11.17	-1.07553	2.18515e-10	3.86997e-09
GeneID:107807080	18.12	19.56	14.04	3.36	3.5	2.78	-1.9754	1.102e-10	2.00881e-09
novel.27790	1.53	1.19	2.21	0.43	0.29	0.58	-1.53183	0.00746195	0.0364986
GeneID:107801615	2.76	2.7	2.83	0.71	1.2	0.9	-1.19291	8.99229e-05	0.000717548
GeneID:107815510	51.81	53.67	49.94	17.05	20.64	19.46	-1.05418	4.04932e-19	1.504e-17
GeneID:107818053	14.61	11.57	13.67	3.88	4.54	6.01	-1.08383	6.30843e-07	7.23325e-06
GeneID:107773846	2.47	4.34	3.64	0.77	1.18	1.67	-1.11528	0.00735898	0.0360719
GeneID:107773108	4.8	5.65	5.01	1.59	1.9	2.01	-1.12785	1.1468e-10	2.08822e-09
GeneID:107773620	3.38	3.53	3.98	0.97	1.67	1.33	-1.05962	0.00679832	0.0337102
GeneID:107810267	3.34	5.14	3.29	0.76	0.66	0.78	-2.04129	2.47066e-08	3.43963e-07
GeneID:107777155	227.88	239.07	199.36	57.72	56.93	60.45	-1.55239	1.12612e-47	1.66571e-45
GeneID:107792476	0.42	0.44	0.16	0	0.02	0.01	-4.88259	0.00312634	0.0172019
GeneID:107832272	4.99	3.99	5.11	1.51	1.65	2.19	-1.01133	0.000534178	0.00359917
GeneID:107821458	4.32	4.43	3.57	0.22	0.37	0.34	-3.39381	8.69935e-07	9.75732e-06
GeneID:107807268	3372.72	2928.91	2232.8	590.96	742.17	817.72	-1.34253	1.84613e-17	6.1626e-16
novel.13594	2.88	3.91	2.61	0.08	0.09	1.09	-2.50869	0.000291849	0.00209337
novel.16740	2.93	2.44	1.97	0.47	0.72	0.55	-1.70186	4.20315e-05	0.000357389
GeneID:107766233	7.36	7.51	7.34	2.29	1.85	3.04	-1.23435	2.92608e-06	3.02311e-05
novel.7670	46.02	48.68	42	11.78	11.62	12.1	-1.54014	1.91719e-24	9.74811e-23
GeneID:107825354	2.25	2.42	2.16	0.84	0.43	0.59	-1.47299	0.00145054	0.00874122
GeneID:107832143	15.29	14.92	15.25	3.68	5.22	3.61	-1.35865	0.000125787	0.000973392
GeneID:107825186	3.9	4.27	4.13	1.19	1.37	1.34	-1.28135	1.68029e-07	2.08647e-06
GeneID:107780691	75.77	69.77	71.66	26.63	23.74	27.26	-1.11462	1.13669e-26	6.68221e-25
GeneID:107823918	22.85	22.08	25.34	4.27	7.1	6.83	-1.53797	5.87556e-13	1.33134e-11
GeneID:107818551	143.29	163.36	162.7	21.69	32.14	49.89	-1.57917	7.55234e-12	1.5504e-10
GeneID:107808242	2.92	2.58	2.84	0.68	0.94	1.14	-1.24468	2.4375e-06	2.54756e-05
GeneID:107784152	0.37	0.6	0.13	0	0	0	-5.33727	0.000645108	0.00426177
GeneID:107827954	49.77	45.73	46.53	15.38	16.35	20.09	-1.03588	2.18029e-15	6.10954e-14
GeneID:107784918	2.19	4.15	6.04	0	0.16	0	-5.87019	1.80228e-07	2.22696e-06
GeneID:107789851	32.26	26.33	30.96	8.29	9.02	8.31	-1.38712	2.69503e-14	6.86192e-13
GeneID:107762747	70.27	54.23	70.92	13.74	26.95	27.91	-1.07397	1.9189e-07	2.36355e-06
GeneID:107807023	1.8	2.31	2.5	0.39	1.19	0.91	-1.0363	0.00521996	0.026817
novel.3549	218.89	40.08	52.7	2.34	19.02	4.22	-3.29121	0.00258666	0.0146036
GeneID:107794490	6.59	5.6	7.38	1.65	1.5	3.3	-1.17042	0.00420943	0.0222347
GeneID:107802244	2.34	2.61	2.64	0.8	1.12	0.53	-1.24782	0.000362203	0.00253844
GeneID:107761088	74.61	64.33	64.37	20.42	27.09	24.35	-1.08863	2.30733e-14	5.9046e-13
GeneID:107821971	18.84	21.12	19.98	4.98	5.24	5.12	-1.58717	1.14299e-24	5.89483e-23
GeneID:107822786	322.21	353.11	305.83	101.87	100.75	98.48	-1.31732	3.98167e-39	4.35643e-37
GeneID:107798324	23.15	21.94	22.94	5.85	7.15	7.72	-1.33758	8.52929e-20	3.28404e-18
GeneID:107798722	46.73	45.9	36.82	9.49	12.88	13.13	-1.46039	1.36988e-16	4.2757e-15
GeneID:107807125	2.93	3.27	1.32	0.76	0.8	0.17	-1.70221	0.00821067	0.0395925
GeneID:107783281	2.32	2.21	2.29	0.56	1.03	0.74	-1.19462	1.21984e-06	1.33698e-05
novel.17928	1.79	1.61	2.05	0.5	0.54	0.16	-1.76703	0.00683011	0.0338413
GeneID:107775146	1.86	2.45	1.88	1.04	0.36	0.24	-1.49798	0.00755305	0.0368584
GeneID:107803192	1.43	1.81	1.18	0.32	0.39	0.45	-1.56608	0.000297182	0.00212684
GeneID:107762848	0.33	0.4	0.38	0	0.08	0.03	-3.09601	0.00260776	0.0147079
novel.10381	11.72	9.86	12.26	2.48	2.76	4.17	-1.46535	6.98454e-11	1.30382e-09
GeneID:107818999	303.19	318.07	304.07	94.83	105.2	108.97	-1.20097	7.99017e-42	9.82967e-40
GeneID:107823752	2.3	1.91	2.7	0.32	1.03	0.96	-1.22161	0.00141292	0.00854718
novel.11509	3.74	3.3	2.46	0.29	0	1.23	-2.20027	0.00725142	0.0356173
GeneID:107830403	1.96	1.76	1.77	0.78	0.39	0.2	-1.591	0.00746658	0.0365136
GeneID:107820245	3.23	3.27	2.87	0.86	1.34	0.96	-1.2127	1.20765e-05	0.00011299
GeneID:107768967	4.01	3.8	3.8	1.22	1.92	1.23	-1.11656	0.000577737	0.00386222
novel.27496	9.2	10.75	8.6	1.1	1.71	1.49	-2.34234	1.04357e-16	3.27953e-15
novel.1945	10.07	9.74	7.98	1.24	2.49	1.81	-1.89332	8.20034e-07	9.2284e-06
GeneID:107798539	5.69	8.88	6.13	2.03	1.62	3.2	-1.14195	0.00263189	0.0148158
GeneID:107775221	2.27	2.84	2.18	0.81	1.04	0.62	-1.20522	5.61658e-05	0.000466098
novel.13733	8.91	7.06	9.78	2.36	3.01	2.72	-1.25992	1.68578e-05	0.000153316
novel.17860	26.79	26.21	26.4	7.03	8	9.58	-1.31258	2.49603e-20	9.97602e-19
GeneID:107768406	8.22	6.89	7.54	2.97	1.28	0.66	-1.72542	0.000735939	0.00479216
novel.18734	8.76	7.62	5.99	1.93	2.9	2.09	-1.28372	9.40763e-05	0.000747144
GeneID:107818510	25.04	23.1	26.49	7.09	10.71	9.79	-1.04964	1.20682e-10	2.19433e-09
GeneID:107778877	2.92	1.55	2.61	1.03	0.7	1	-1.07551	3.86082e-05	0.000330005
GeneID:107796649	470.46	452.45	406.78	119.43	113.06	131.11	-1.49465	5.79784e-47	8.47644e-45
GeneID:107814137	2.11	2.26	2.31	0.83	0.42	0.73	-1.33167	0.00602095	0.0303509
GeneID:107801011	10.48	7.28	16.28	0.85	1.32	3.68	-2.13588	8.53177e-08	1.10484e-06
GeneID:107767497	6.18	6.55	6.17	1.78	1.84	2.24	-1.31926	7.37267e-11	1.37374e-09
novel.26660	2.14	2.84	2.63	0.39	1.05	0.5	-1.57465	0.0026179	0.0147535
GeneID:107778694	14.64	12.17	13.12	3.92	3.29	4.14	-1.35194	3.08951e-05	0.000268768
GeneID:107787912	384.73	342.95	414.6	62.06	70.15	82.78	-2.00632	1.21087e-76	4.12671e-74
GeneID:107830554	36.21	34.75	38.62	10.89	10.46	11.74	-1.35235	1.3379e-32	1.09549e-30
GeneID:107780549	21.27	20.8	19.82	5	7.12	7.03	-1.29401	3.06674e-11	5.91297e-10
GeneID:107814152	27.53	27.7	25.68	7.64	7.78	8.83	-1.3589	3.3532e-22	1.48102e-20
novel.12520	6.36	7.01	5.87	1.58	1.99	2.12	-1.39708	1.63795e-11	3.25903e-10
GeneID:107782517	4.32	3.98	3.83	1.28	1.45	1.54	-1.1282	0.000136032	0.00104657
GeneID:107824254	7.49	7.62	6.1	1.69	2.05	2.54	-1.38275	6.75285e-09	1.00415e-07
GeneID:107778365	8.66	10.56	9.33	2.95	3.1	4.51	-1.06469	5.27224e-08	7.01467e-07
GeneID:107759208	1.45	1.26	3.11	0.21	0.59	0.37	-1.90741	0.0039854	0.0212135
GeneID:107816572	1.12	0.98	0.91	0.27	0.42	0.26	-1.30494	0.00143746	0.00867483
novel.21757	3.82	9.68	7.36	0.85	1.02	0.75	-2.52397	7.1159e-06	6.90095e-05
GeneID:107763633	982.8	904.72	860.57	328.64	249.45	331.14	-1.0998	1.5422e-21	6.54221e-20
GeneID:107771021	0.88	0.86	0.31	0.1	0.27	0.18	-1.57487	0.00801658	0.0387938
GeneID:107795870	11.89	11.69	16.22	2.62	2.82	2.69	-1.87911	5.54545e-13	1.25937e-11
GeneID:107820182	10.36	11.95	9.36	3.74	3.47	3.87	-1.10932	3.51965e-12	7.44351e-11
novel.19542	14.7	10.82	13.92	2.13	4.76	3.58	-1.50856	5.23627e-14	1.31008e-12
GeneID:107764785	2.38	2.82	1.89	0.11	0.15	0	-4.58517	0.000137998	0.00106057
GeneID:107759519	16.07	16.76	16.41	3.21	5.75	4.17	-1.56552	1.51145e-18	5.39151e-17
GeneID:107788480	1.76	2.28	2.79	0.73	0.55	0.73	-1.36271	0.004543	0.0237603
GeneID:107764147	17.68	19.03	19.95	4.46	5.54	5.45	-1.49599	4.56808e-28	2.93142e-26
novel.4601	851.44	170.69	159.43	3.84	71.78	17.97	-3.31624	0.00955835	0.0449901
GeneID:107829216	0.3	0.1	0.03	0	0	0	-4.60612	0.0105842	0.0489774
GeneID:107815479	34.08	33.2	39.29	7.4	7.39	10.18	-1.68361	3.17973e-22	1.40934e-20
GeneID:107830533	16.52	12.87	13.58	3.15	2.74	3.23	-1.82747	5.92639e-12	1.23013e-10
novel.7027	4.87	4.25	2.17	0.2	0.4	0.41	-2.99298	0.0013952	0.00845723
GeneID:107807267	5.2	5.25	5.87	0.82	1.62	1.83	-1.58898	6.9719e-07	7.93267e-06
GeneID:107819225	52.62	51.65	46.75	16.87	15.41	17.9	-1.20963	8.92398e-23	4.10864e-21
GeneID:107787268	0.65	0.51	1.12	0.14	0.26	0.26	-1.45273	0.00494624	0.0255959
GeneID:107828755	5.6	12.01	10.51	2.03	0.98	3.86	-1.512	0.00807421	0.0390315
GeneID:107764607	4.78	4.5	5.69	1.3	0.93	1.16	-1.62008	0.00836918	0.0402261
GeneID:107798013	16.22	18.52	16.22	3.95	4.6	5.01	-1.51527	4.21722e-14	1.06356e-12
GeneID:107814772	16.33	16.43	15.25	5.28	6.8	5.54	-1.07946	4.35539e-15	1.18299e-13
GeneID:107831563	9.53	10.55	8.99	3.12	2.5	3.2	-1.33024	6.37357e-10	1.0795e-08
novel.13800	38.52	37.89	46.93	5.24	6.63	6.18	-2.35836	1.61377e-39	1.80882e-37
GeneID:107786549	17.68	18.31	20.43	5.99	7.52	7.21	-1.03496	5.01847e-07	5.8351e-06
GeneID:107816879	35.28	34.65	28.61	10.44	13.3	12.18	-1.06143	2.64288e-11	5.14093e-10
GeneID:107774282	0.59	0.86	0.65	0.18	0.18	0.25	-1.42183	0.000686022	0.0045025
GeneID:107826980	5.85	5.15	9.68	0.58	1.21	2.22	-1.73099	0.000387472	0.00269531
GeneID:107828686	7.72	8.01	9.31	1.49	1.49	2.13	-1.87635	6.42722e-07	7.35943e-06
GeneID:107782540	20.92	25.45	21.85	6.34	5.23	4.85	-1.65108	1.99239e-17	6.63764e-16
GeneID:107811395	10.22	11.49	10.85	2.29	3.84	3.91	-1.26119	9.65449e-05	0.000764823
GeneID:107762031	8.61	11.61	9.6	3.15	2.59	3.16	-1.33852	2.60844e-07	3.14303e-06
GeneID:107822720	4.66	5.6	3.15	1.39	1.54	2.03	-1.06827	0.00015715	0.00119519
novel.6456	3.43	2.51	3.25	0.77	0.97	1.17	-1.26703	0.00262539	0.0147875
novel.19768	22.23	23.69	18.8	7.46	7.33	8.9	-1.05659	6.57522e-09	9.79178e-08
GeneID:107827512	0.92	1.1	0.79	0.25	0.33	0.26	-1.36544	0.00913683	0.0433254
novel.15471	439.17	387.18	328.12	91.37	81.72	74.98	-1.81678	1.38235e-43	1.78781e-41
GeneID:107780674	3.44	3.24	2.93	0.74	1.08	0.54	-1.63559	1.31385e-05	0.000121975
GeneID:107814891	193.42	213.38	199.4	2.92	0.86	3.61	-5.7139	6.02645e-82	2.26842e-79
GeneID:107774615	138.9	134.93	144.13	49.14	52.15	47.68	-1.0581	3.8034e-22	1.67399e-20
novel.8432	2.25	1.86	1.79	0.52	0.57	0.41	-1.60451	0.000222187	0.00163508
GeneID:107762794	0.31	0.33	0.42	0	0	0.04	-4.16747	0.00670683	0.0332828
novel.2274	13.14	16.57	12.71	4.22	3.57	4.06	-1.4374	2.33344e-10	4.11814e-09
novel.15504	2.56	1.49	1.64	0.21	0.52	0.35	-2.02097	0.000512014	0.00346591
novel.16213	1.94	5.73	19.74	0	0	0	-4.74551	0.00719854	0.0353955
novel.3584	15.49	17.72	11.42	0	0.84	0.22	-4.86618	1.37834e-10	2.49272e-09
GeneID:107780285	65.49	65.98	60.4	18.87	18.71	22.93	-1.27816	7.68191e-25	3.99452e-23
GeneID:107831766	31.29	31.02	25.62	8.03	11.69	10.77	-1.15799	5.19361e-14	1.30005e-12
GeneID:107761410	7.68	8.66	6	2.12	3.37	2.65	-1.06364	0.000286116	0.00205605
GeneID:107763072	66.81	68.56	59.07	16.14	15.7	17.49	-1.57815	3.14569e-31	2.40038e-29
GeneID:107824130	2.81	1.14	0.7	0.14	0	0.03	-4.3919	3.75305e-08	5.08734e-07
GeneID:107787770	19.9	16.91	23.13	7.1	7.13	7.61	-1.04287	1.20713e-07	1.52788e-06
novel.22470	1.99	2.53	1.24	0.52	0.26	0.68	-1.5919	0.00272756	0.0152929
GeneID:107825762	3.35	3.47	3.63	1.48	1.04	1.38	-1.02883	0.0028747	0.0160183
GeneID:107818290	8.47	7.81	2.46	0.31	0.64	0.99	-2.81378	3.72286e-05	0.000319023
GeneID:107771427	3.04	2.03	2.15	1.01	0.47	0.39	-1.52504	0.00700277	0.0345643
GeneID:107812133	1.32	2.06	1.6	0.07	0.35	0.29	-2.56094	0.000652693	0.00430624
GeneID:107777033	1.41	1.25	1.5	0.13	0.46	0.14	-2.16143	8.55488e-05	0.000685464
GeneID:107760859	6.17	6.43	5.45	2.17	2.13	2.32	-1.07769	7.39946e-09	1.09481e-07
GeneID:107795668	4.29	4.3	4.65	1.35	1.36	1.98	-1.12142	6.41791e-05	0.00052662
GeneID:107813982	7.98	8.01	7.06	2.97	2.49	3.27	-1.01663	3.6659e-06	3.72791e-05
GeneID:107819710	47.8	46.29	48.38	12.58	14.89	18.56	-1.2216	2.57918e-15	7.15968e-14
GeneID:107815372	3.16	3.07	3.34	0.41	1.31	0.78	-1.51098	0.0086133	0.0412658
GeneID:107818544	3.96	4.73	4.73	1.69	1.6	1.81	-1.08488	0.00331251	0.0180706
novel.18345	5.99	8.28	3.62	1.45	1.6	2.4	-1.34472	2.47273e-05	0.000218887
GeneID:107773552	1.37	1.12	0.85	0.08	0.42	0	-2.37669	0.00206935	0.0119958
novel.12376	67.96	70.33	63.9	12.78	19.95	19.49	-1.56089	4.66276e-25	2.47043e-23
GeneID:107764496	1.69	1.97	1.78	0.65	0.63	0.78	-1.02653	0.00302522	0.0167258
GeneID:107786602	2.23	2.78	2.03	0.61	0.7	0.78	-1.39113	1.54337e-05	0.000141538
novel.21377	3.64	4.33	4.92	1.39	0.71	0.99	-1.68216	0.000239663	0.00175397
GeneID:107779419	3.55	3.05	4.63	0.75	1.04	0.57	-1.83669	0.000104141	0.000819462
novel.15137	79.35	81.03	115.86	19.56	41.03	38.19	-1.08748	0.00070925	0.00463632
GeneID:107829680	2.28	2.43	2.51	0.29	0.51	0.82	-1.74532	0.0069865	0.0344975
novel.19694	3.35	2.8	3.05	0.41	0.53	0.42	-2.40695	1.28887e-11	2.59726e-10
GeneID:107803355	120.9	129.54	121.1	20.38	32.39	46.86	-1.43769	8.73948e-13	1.94963e-11
GeneID:107769985	11.38	9.09	10.23	3.85	3.81	4.02	-1.00641	1.06219e-06	1.1762e-05
novel.18393	3.54	3.75	4.85	0.7	1	0.15	-2.24457	0.000869096	0.00555523
GeneID:107777358	0.41	0.49	0.34	0	0	0	-5.67494	0.000100062	0.000789958
GeneID:107765545	21.12	25.44	19.46	5.16	5.23	7.63	-1.24021	3.15287e-10	5.49698e-09
GeneID:107793153	25.97	25.48	29.6	9.51	10.33	10.98	-1.02992	7.10028e-23	3.29467e-21
GeneID:107824350	2.06	2.05	2.15	0.9	0.53	0.72	-1.15495	0.00141683	0.00856671
GeneID:107785428	21.5	19.55	20.99	3.89	5.04	5.25	-1.73274	7.91247e-18	2.70208e-16
GeneID:107780225	7.31	6.54	7.6	2.84	2.81	2.21	-1.11611	2.85187e-08	3.9345e-07
GeneID:107789985	3.28	3.82	3.65	1.09	0.62	1.67	-1.26104	0.00296549	0.016446
novel.121	2.65	3.2	1.49	0	0.19	0.42	-3.31647	3.6337e-08	4.94149e-07
GeneID:107803258	82.08	70.08	79.77	22.39	24.11	27.42	-1.21141	2.93259e-17	9.6363e-16
novel.26874	9.79	10.44	7.61	3.1	3.53	2.97	-1.12719	2.47218e-06	2.58273e-05
novel.13830	14.43	12.19	11.48	2.02	1.46	1.66	-2.48554	8.15645e-20	3.15493e-18
GeneID:107759005	5.17	6.47	4.8	0.61	1	0.57	-2.53075	3.4674e-13	8.06327e-12
novel.8036	2.23	2.4	2.93	0.1	0.52	1.04	-1.828	0.000494587	0.00335753
GeneID:107807630	13.17	13.41	15.67	4.23	4.63	5.12	-1.20821	3.08912e-11	5.95384e-10
GeneID:107790029	1.69	2.22	1.51	0.71	0.58	0.63	-1.12229	0.00132339	0.00806555
GeneID:107791499	4.84	4.05	4.98	1.56	1.56	1.84	-1.08281	0.00147634	0.00887861
GeneID:107803217	7.74	7.44	9.77	1.77	2.46	2.57	-1.22517	5.62923e-11	1.06262e-09
GeneID:107813836	1.73	1.47	1.77	0.3	0.85	0.6	-1.15403	0.00874642	0.0417885
GeneID:107808648	2.91	2.99	3.61	1.04	1.02	1.06	-1.23456	7.13778e-07	8.10132e-06
GeneID:107829589	3.13	2.74	3.47	0.88	1.27	0.84	-1.08586	0.000203991	0.00151377
GeneID:107763927	15.44	15.2	13.56	3.24	4.17	5	-1.40644	2.03139e-07	2.49177e-06
GeneID:107802904	21.66	23.37	28.7	8.38	8.3	10.23	-1.14413	1.5394e-10	2.76516e-09
GeneID:107803463	12.92	12.49	9.03	4.41	2.48	3.83	-1.27498	3.84758e-06	3.89617e-05
GeneID:107760194	1.08	0.39	0.33	0.09	0.05	0	-3.24151	0.00671714	0.0333274
novel.15867	3.68	4.75	4.05	1.32	1.54	1.43	-1.18132	6.99446e-09	1.03824e-07
novel.12730	4.77	4.49	5.07	1.25	1.08	1.91	-1.35511	0.000156093	0.0011884
GeneID:107788335	0.7	0.77	0.55	0.17	0.22	0.22	-1.39307	0.00577792	0.0292897
GeneID:107832523	8.57	7.95	8.51	1.54	3.23	2.4	-1.41637	3.28754e-07	3.91362e-06
GeneID:107796081	3.09	2.7	2.67	0.93	1.1	1.08	-1.08593	7.1208e-07	8.08387e-06
GeneID:107790802	4.56	4.69	3.7	1.03	0.96	1.59	-1.42285	0.0047686	0.0247911
novel.6428	8.18	4.05	1.14	0.21	0.11	0	-4.9178	2.29208e-06	2.40304e-05
GeneID:107807860	5.99	6.73	5.7	2.23	2.47	1.72	-1.1013	0.00125375	0.00768758
GeneID:107770457	6.62	6.83	6.42	1.8	2.32	2.26	-1.27916	1.92325e-12	4.15803e-11
GeneID:107818556	14.69	11.57	16.29	5.05	5.41	5.72	-1.00467	2.00578e-07	2.46334e-06
novel.14	21.42	18.33	22.97	1.77	6.17	4.36	-2.0006	4.65506e-05	0.000392308
novel.1866	1.63	1.62	0.95	0	0.09	0.38	-2.76141	0.00553679	0.0282342
GeneID:107780795	19.53	19.56	19.94	6.45	6.83	8.51	-1.0598	1.52071e-12	3.32335e-11
GeneID:107786155	96.61	96.06	107.42	33.42	36.68	43.05	-1.02339	4.7222e-22	2.07116e-20
GeneID:107819595	14.7	14.05	16.71	3.52	3.71	4.59	-1.34789	1.17348e-18	4.21276e-17
GeneID:107777413	0.77	0.95	0.95	0.4	0.22	0.24	-1.24236	0.00172608	0.0102125
GeneID:107821172	5.36	4.54	3.84	0.86	1.87	1.55	-1.30366	0.000174612	0.0013151
GeneID:107795180	6.67	6.46	7.14	1.24	2.14	0.73	-1.83674	0.000173048	0.00130547
GeneID:107765859	25.74	27.56	23.74	4.31	4.76	5.76	-2.00404	3.59676e-36	3.48209e-34
novel.12611	18.74	3.53	4.92	0	0.18	1.03	-4.54968	0.000386092	0.00268682
GeneID:107810135	16.3	15.47	19.41	7.08	6.2	5.82	-1.03492	3.60939e-11	6.92484e-10
novel.10531	10.81	8.98	4.2	1.02	1.68	1.32	-2.18463	0.00108505	0.00675583
GeneID:107785969	7.07	6.94	5.67	1.87	1.88	2.14	-1.36832	1.52211e-08	2.17305e-07
GeneID:107811984	11.03	11.46	14.37	1.27	2.95	3.17	-1.91622	3.26339e-10	5.67985e-09
novel.10980	8	6.57	7.32	1.32	2	1.35	-1.82496	1.53553e-07	1.91757e-06
novel.13113	5.39	5.67	4.65	1.44	1.68	1.35	-1.45588	6.82232e-11	1.27638e-09
GeneID:107781330	2.13	2.67	1.73	0	0	0.18	-4.86641	3.81291e-05	0.000326075
GeneID:107804067	236.64	242.41	289.4	77.29	97.3	100.92	-1.10328	8.17123e-27	4.83742e-25
GeneID:107791273	8.42	6.39	8.39	1.58	2.6	1.81	-1.51311	9.87935e-05	0.000780796
GeneID:107774339	0.64	0.72	1	0.1	0.29	0.2	-1.66921	0.00139761	0.00846846
novel.615	2.35	3.48	4.13	0.39	1.04	0.85	-1.70084	0.00292691	0.0162673
novel.12521	5.58	4.64	5.7	0.78	2.27	2.21	-1.19731	0.00262029	0.0147654
novel.5994	8.51	7.31	6.4	0.98	1.43	1.25	-2.18503	2.33728e-08	3.26566e-07
GeneID:107784549	0.82	0.88	0.66	0.07	0.16	0.24	-1.93282	0.00747226	0.0365349
GeneID:107773119	4.31	2.86	2.6	0.86	0.71	1.08	-1.45162	0.00755186	0.0368561
GeneID:107800934	22.47	18.02	25.04	3.65	7.13	7.88	-1.35868	1.607e-06	1.729e-05
GeneID:107808785	0.77	1.14	0.9	0.09	0.12	0.27	-2.4011	0.0108089	0.0499075
GeneID:107774439	2.85	2.37	2.29	0.99	0.77	1.09	-1.006	0.00751694	0.0367248
GeneID:107797192	33.96	32.58	36.93	12.02	12.4	13.32	-1.01875	6.90797e-09	1.0257e-07
novel.24775	10.5	9.48	5.97	0.31	0.39	0.44	-4.14339	2.14376e-25	1.1715e-23
GeneID:107782998	72.11	92.33	84.03	27.24	28.18	34.55	-1.04193	2.44435e-13	5.76932e-12
novel.4270	6.29	6.45	5.78	1.89	2.11	0.95	-1.49182	2.0602e-05	0.000184639
GeneID:107764530	1.26	2.24	1.81	0.32	0.43	0.43	-1.76224	0.0101454	0.0472854
GeneID:107776763	67.97	67.42	60.83	22.47	18.03	23.37	-1.2336	5.05212e-21	2.09387e-19
GeneID:107800510	7.99	6.51	7.06	1.64	1.42	1.79	-1.77026	1.33843e-09	2.17841e-08
GeneID:107762783	1.65	1.07	1.19	0	0	0.18	-4.04216	0.00985415	0.0461584
GeneID:107766486	5.78	4.21	8.81	1.37	2.35	2.36	-1.23931	0.000131546	0.00101469
GeneID:107772897	2.04	2.16	2.59	0.25	0.4	0.54	-2.06824	0.00966864	0.045399
GeneID:107765258	1.81	2.47	1.5	0.86	0.72	0.61	-1.04014	8.39557e-05	0.000673795
GeneID:107828527	5.23	4.91	4.69	1.59	0.74	0.61	-1.86471	0.00123249	0.00757155
GeneID:107831493	3.13	2.76	4.06	0	0.81	0.55	-2.42771	0.00131801	0.00803764
GeneID:107832677	2.1	1.86	2.23	0.47	1	0.81	-1.07331	0.00412858	0.0218649
novel.2171	2.16	3	3.23	0.92	1.48	0.64	-1.06763	0.00935424	0.0441943
GeneID:107771678	48.43	38.41	48.49	5.73	7.16	9.86	-2.16245	3.08973e-30	2.25859e-28
novel.726	4.01	5.73	5.8	0.91	1.75	1.88	-1.38821	4.42772e-05	0.000374715
GeneID:107774020	2.27	2.17	2.21	0.15	0.14	0.57	-2.58599	1.33328e-08	1.91648e-07
GeneID:107814521	6.87	7.04	8.25	2.04	2	3.26	-1.22681	5.68372e-08	7.52839e-07
GeneID:107771747	302.6	309.91	326.9	116.41	118.6	124.35	-1.01422	4.07997e-37	4.15736e-35
GeneID:107791569	0.54	0.66	1.19	0.06	0	0.19	-2.85596	0.00853011	0.0409294
GeneID:107773635	1	1.21	0.85	0.1	0.42	0	-2.19792	0.00716627	0.0352678
GeneID:107818200	62.76	79.45	74.76	10.41	13.79	17.49	-1.96624	4.51451e-31	3.42417e-29
GeneID:107803114	5.24	3.18	5.26	1.27	1.77	2.18	-1.05353	0.00107855	0.00671786
GeneID:107802751	0.94	0.78	0.44	0.12	0.09	0	-3.24847	0.000417881	0.0028822
GeneID:107822431	1.21	1.93	0.98	0.37	0.29	0.39	-1.63877	4.3091e-06	4.33306e-05
GeneID:107831477	2.08	1.86	2.01	0.75	0.62	0.87	-1.02508	0.000181141	0.00135981
GeneID:107800169	99.41	100.37	92.98	37.85	30.59	33.7	-1.12483	2.43477e-20	9.73888e-19
GeneID:107832207	96.32	93.73	92.88	34.89	33.35	34.95	-1.06191	9.60629e-24	4.69053e-22
novel.21633	1.84	1.9	2.21	0.84	0.49	0.31	-1.4402	0.00710153	0.0349867
novel.19162	5.06	5.96	5.58	0.72	0.3	1.83	-2.08867	0.000412478	0.00284822
GeneID:107761389	1.89	1.82	1.68	0.55	0.5	0.65	-1.30615	0.000576027	0.00385181
GeneID:107796013	2.78	4	3.48	1.09	1.17	1.61	-1.05138	9.21449e-06	8.77918e-05
GeneID:107828213	208.12	219.49	199.16	67.92	73.3	86.83	-1.0663	6.46502e-23	3.01098e-21
novel.14479	775.01	739.69	679.14	219.18	205.84	221.12	-1.23696	9.86914e-33	8.12055e-31
GeneID:107803037	3.06	3.36	1.37	0.89	0.49	0.53	-1.62662	0.00708033	0.0349027
GeneID:107822013	3.83	3.45	3.17	1.09	1.12	1.5	-1.1264	1.45129e-05	0.000133702
novel.21	6.73	6.12	5.43	0.63	0.67	0.79	-2.69657	7.49507e-08	9.78121e-07
GeneID:107794829	37.35	40.45	59.65	4.47	14.07	10.89	-1.80182	0.000148726	0.00113574
GeneID:107822814	1.87	2.22	1.63	0.48	0.57	0.4	-1.58095	0.00249257	0.0141354
GeneID:107760854	5.22	3.34	4.71	0.35	0.19	0.47	-3.29434	5.88554e-08	7.77937e-07
GeneID:107802058	6.9	8.74	5.02	1.77	0.7	1.18	-2.06217	9.48942e-06	9.01897e-05
novel.16806	19.71	16.93	18.42	7.18	5.73	7.58	-1.02672	3.59703e-08	4.89559e-07
novel.11727	19.84	17.93	17.68	4.17	4.17	5.43	-1.39921	7.28994e-16	2.13529e-14
GeneID:107768173	2.8	1.99	2.17	0.71	0.32	0.54	-1.71813	0.0105079	0.0487007
GeneID:107762412	2.22	2.9	4.04	1.23	0.64	1.29	-1.13465	0.00623903	0.0312596
novel.19576	3.39	2.23	3.19	0	0.25	0.26	-3.6849	9.51849e-05	0.000755355
GeneID:107767340	5.56	4.75	3.66	1.61	1.48	0.91	-1.38476	0.000800906	0.00516915
GeneID:107795944	44.58	44.24	43.33	8.33	9.21	12.12	-1.75806	3.52849e-29	2.4018e-27
GeneID:107813352	0.99	0.61	0.58	0.16	0	0	-3.28195	0.00560954	0.0285625
GeneID:107825536	9.85	12.61	7.11	2.33	2.4	3.01	-1.60557	9.36059e-13	2.08266e-11
GeneID:107769639	0.75	0.2	0.12	0.04	0	0	-4.2576	0.0013617	0.008279
GeneID:107787167	210.59	212.08	176.07	61.24	65.55	66.86	-1.23629	8.05486e-28	5.07215e-26
GeneID:107809960	0.86	1.11	1.15	0.22	0.24	0.15	-1.97002	0.00378998	0.0203235
GeneID:107831389	7.3	8.57	5.37	0.34	1.2	2.43	-1.99212	0.000709968	0.00463921
GeneID:107794791	4.18	4.44	5.23	0.91	1.15	1.47	-1.61102	4.21641e-16	1.25767e-14
GeneID:107806352	2.18	2.38	2.03	0.43	0.51	0.56	-1.79274	2.41803e-06	2.52825e-05
GeneID:107824831	19.45	18.04	14.36	5.86	7.55	5.98	-1.02851	2.41708e-07	2.92432e-06
novel.11123	2.6	3.21	3.66	0.85	0.87	0.71	-1.57014	7.95332e-05	0.000641954
GeneID:107759047	2.57	2.69	2.62	0.71	0.76	0.99	-1.30843	2.03181e-05	0.000182386
GeneID:107805468	9.88	11.81	11.61	3.43	4.13	4.3	-1.11983	8.93955e-13	1.9925e-11
novel.26971	9.67	8.68	8.98	2.48	3.34	3.07	-1.25779	7.73155e-13	1.73244e-11
GeneID:107815724	1.46	1.39	1.55	0.44	0.35	0.66	-1.21013	0.00285979	0.0159523
GeneID:107768312	9.07	8.84	8.13	3.59	3.08	3.41	-1.00097	4.56347e-11	8.66956e-10
GeneID:107765399	2.94	1.77	1.13	0	0.16	0.16	-3.72264	0.0051109	0.0263211
GeneID:107797742	2.91	3.36	4.27	1.31	1.2	1.49	-1.01161	5.14019e-06	5.11071e-05
novel.8423	2.03	2.6	1.69	0.93	0.77	0.69	-1.01587	0.00709503	0.0349644
GeneID:107799777	24.17	25.66	32.1	7.18	10.04	10.16	-1.08107	1.60898e-07	2.00433e-06
GeneID:107762350	10.01	12.23	10.82	2.32	2.76	3.13	-1.64137	6.57044e-21	2.70978e-19
GeneID:107815651	6.09	3.62	5.02	0.8	0	0.54	-2.97969	0.000586616	0.00391431
[truncated: 201 more rows]
