# Supplementary material for: Integrated Multi-Omics Analyses Reveal That Autophagy-Mediated Cellular Metabolism Is Required for the Initiation of Pollen Germination
Source: Int J Mol Sci. 2023 Oct 9;24(19):15014. doi: 10.3390/ijms241915014 (PMC10573924; doi:10.3390/ijms241915014)
Supplement: Supplementary file 1 [file ijms-24-15014-s001.zip › Supplementary Data S2.xlsx]

## Sheet: Sheet1
GeneID
GeneID:107823622
GeneID:107779006
GeneID:107796081
GeneID:107823370
GeneID:107761504
GeneID:107787405
GeneID:107812668
GeneID:107801015
GeneID:107827566
GeneID:107781744
GeneID:107800221
GeneID:107770782
GeneID:107763720
GeneID:107781205
GeneID:107806458
GeneID:107796036
GeneID:107774496
GeneID:107815122
GeneID:107807406
GeneID:107808575
GeneID:107773835
GeneID:107797139
GeneID:107771913
GeneID:107783697
GeneID:107807406
GeneID:107796671
GeneID:107801625
GeneID:107762300
GeneID:107809738
GeneID:107825870
GeneID:107810019
GeneID:107784648
GeneID:107808171
GeneID:107805981
GeneID:107779762
GeneID:107823406
GeneID:107809382
GeneID:107807317
GeneID:107768356
GeneID:107774459
GeneID:107793074
GeneID:107791867
GeneID:107793760
GeneID:107829551
GeneID:107816838
GeneID:107814653
GeneID:107764341
GeneID:107799563
GeneID:107780681
GeneID:107826429
GeneID:107789243
GeneID:107787836
GeneID:107780879
GeneID:107812265
GeneID:107792633
GeneID:107779634
GeneID:107830966
GeneID:107820613
GeneID:107803631
GeneID:107812776
GeneID:107829484
GeneID:107795679
GeneID:107822162
GeneID:107795914
GeneID:107799945
GeneID:107759096
GeneID:107789715
GeneID:107788138
GeneID:107801082
GeneID:107813034
GeneID:107828210
GeneID:107773228
GeneID:107805335
GeneID:107790195
GeneID:107800968
GeneID:107829658
GeneID:107773073
GeneID:107764759
GeneID:107776807
GeneID:107804760
GeneID:107809225
GeneID:107799743
GeneID:107803526
GeneID:107774558
GeneID:107763880
GeneID:107824673
GeneID:107803362
GeneID:107774813
GeneID:107808768
GeneID:107815249
GeneID:107796630
GeneID:107804656
GeneID:107793913
GeneID:107791726
GeneID:107828022
GeneID:107828022
GeneID:107795692
GeneID:107802309
GeneID:107800420
GeneID:107809369
GeneID:107818926
GeneID:107812709
GeneID:107797291
GeneID:107832824
GeneID:107783266
GeneID:107789098
GeneID:107831427
GeneID:107779497
GeneID:107816191
GeneID:107775778
GeneID:107812654
GeneID:107778772
GeneID:107766191
GeneID:107820741
GeneID:107788240
GeneID:107761715
GeneID:107795851
GeneID:107791227
GeneID:107771406
GeneID:107812910
GeneID:107785174
GeneID:107773252
GeneID:107765045
GeneID:107802825
GeneID:107773997
GeneID:107806824
GeneID:107792264
GeneID:107762248
GeneID:107771192
GeneID:107761962
GeneID:107818565
GeneID:107764902
GeneID:107798041
GeneID:107790889
GeneID:107828249
GeneID:107760530
GeneID:107763453
GeneID:107826769
GeneID:107830021
GeneID:107805414
GeneID:107790852
GeneID:107796299
GeneID:107763593
GeneID:107784703
GeneID:107809208
GeneID:107832232
GeneID:107829850
GeneID:107762394
GeneID:107763219
GeneID:107785395
GeneID:107775096
GeneID:107780439
GeneID:107795273
GeneID:107795629
GeneID:107769873
GeneID:107803127
GeneID:107822419
GeneID:107811220
GeneID:107821508
GeneID:107791354
GeneID:107819849
GeneID:107759700
GeneID:107797717
GeneID:107821230
GeneID:107788167
GeneID:107814079
GeneID:107806544
GeneID:107802013
GeneID:107799898
GeneID:107792416
GeneID:107789536
GeneID:107777356
GeneID:107782199
GeneID:107801636
GeneID:107823398
GeneID:107768358
GeneID:107799536
GeneID:107822797
GeneID:107812461
GeneID:107771362
GeneID:107826788
GeneID:107802154
GeneID:107809671
GeneID:107812440
GeneID:107807162
GeneID:107777832
GeneID:107814831
GeneID:107810619
GeneID:107830935
GeneID:107792530
GeneID:107811995
GeneID:107824893
GeneID:107790816
GeneID:107802495
GeneID:107828283
GeneID:107796996
GeneID:107759526
GeneID:107762617
GeneID:107779561
GeneID:107807257
GeneID:107783455
GeneID:107832342
GeneID:107761793
GeneID:107818824
GeneID:107796991
GeneID:107794051
GeneID:107831468
GeneID:107830809
GeneID:107780228
GeneID:107780169
GeneID:107787357
GeneID:107795941
GeneID:107758982
GeneID:107765845
GeneID:107790734
GeneID:107789585
GeneID:107832317
GeneID:107762268
GeneID:107784720
GeneID:107826685
GeneID:107810992
GeneID:107820464
GeneID:107781666
GeneID:107759474
GeneID:107807431
GeneID:107826345
GeneID:107783417
GeneID:107767589
GeneID:107800376
GeneID:107825894
GeneID:107826862
GeneID:107760012
GeneID:107809795
GeneID:107816889
GeneID:107798632
GeneID:107788337
GeneID:107827548
GeneID:107759123
GeneID:107783652
GeneID:107791368
GeneID:107769508
GeneID:107796395
GeneID:107790119
GeneID:107831473
GeneID:107807683
GeneID:107777978
GeneID:107798809
GeneID:107795664
GeneID:107786018
GeneID:107832467
GeneID:107809305
GeneID:107773089
GeneID:107761067
GeneID:107790933
GeneID:107832731
GeneID:107761354
GeneID:107815976
GeneID:107813275
GeneID:107787736
GeneID:107763964
GeneID:107805518
GeneID:107822036
GeneID:107785290
GeneID:107785026
GeneID:107821720
GeneID:107792530
GeneID:107798023
GeneID:107807398
GeneID:107770372
GeneID:107791639
GeneID:107795691
GeneID:107802933
GeneID:107826795
GeneID:107770150
GeneID:107807691
GeneID:107792320
GeneID:107791996
GeneID:107788967
GeneID:107760595
GeneID:107798778
GeneID:107830264
GeneID:107815976
GeneID:107792906
GeneID:107773091
GeneID:107814946
GeneID:107759856
GeneID:107759307
GeneID:107782212
GeneID:107773402
GeneID:107766911
GeneID:107792811
GeneID:107767977
GeneID:107789320
GeneID:107821126
GeneID:107797476
GeneID:107830632
GeneID:107810364
GeneID:107790000
GeneID:107790528
GeneID:107770546
GeneID:107789087
GeneID:107760944
GeneID:107818983
GeneID:107793546
GeneID:107796717
GeneID:107817083
GeneID:107818630
GeneID:107792660
GeneID:107762347
GeneID:107807360
GeneID:107789889
GeneID:107824775
GeneID:107787778
GeneID:107824904
GeneID:107766522
GeneID:107805698
GeneID:107818930
GeneID:107795320
GeneID:107803356
GeneID:107769916
GeneID:107814068
GeneID:107787842
GeneID:107829423
GeneID:107766836
GeneID:107784108
GeneID:107814323
GeneID:107825185
GeneID:107824297
GeneID:107825185
GeneID:107817672
GeneID:107805578
GeneID:107782276
GeneID:107817672
GeneID:107802006
GeneID:107808054
GeneID:107801917
GeneID:107795064
GeneID:107780308
GeneID:107811481
GeneID:107794880
GeneID:107822078
GeneID:107832610
GeneID:107769748
GeneID:107800078
GeneID:107799667
GeneID:107775122
GeneID:107826220
GeneID:107781613
GeneID:107790563
GeneID:107820748
GeneID:107779761
GeneID:107830599
GeneID:107762247
GeneID:107778766
GeneID:107801123
GeneID:107813001
GeneID:107802486
GeneID:107810804
GeneID:107802270
GeneID:107823125
GeneID:107811250
GeneID:107794309
GeneID:107767668
GeneID:107766087
GeneID:107807979
GeneID:107791219
GeneID:107825941
GeneID:107781603
GeneID:107763212
GeneID:107764786
GeneID:107793804
GeneID:107812562
GeneID:107765506
GeneID:107807722
GeneID:107823752
GeneID:107779673
GeneID:107761161
GeneID:107762618
GeneID:107789343
GeneID:107785435
GeneID:107820822
GeneID:107784000
GeneID:107806002
GeneID:107770183
GeneID:107805719
GeneID:107770355
GeneID:107763612
GeneID:107782341
GeneID:107765582
GeneID:107763703
GeneID:107799921
GeneID:107796557
GeneID:107772620
GeneID:107821431
GeneID:107773063
GeneID:107790192
GeneID:107832546
GeneID:107777961
GeneID:107808066
GeneID:107823619
GeneID:107792424
GeneID:107794807
GeneID:107795649
GeneID:107782025
GeneID:107785996
GeneID:107778371
GeneID:107831796
GeneID:107808467
GeneID:107817448
GeneID:107832261
GeneID:107759965
GeneID:107790521
GeneID:107813907
GeneID:107822248
GeneID:107789531
GeneID:107786727
GeneID:107823766
GeneID:107808266
GeneID:107819477
GeneID:107829594
GeneID:107777179
GeneID:107776498
GeneID:107807224
GeneID:107795565
GeneID:107787901
GeneID:107822257
GeneID:107772431
GeneID:107772649
GeneID:107768308
GeneID:107831509
GeneID:107814057
GeneID:107767851
GeneID:107802493
GeneID:107798004
GeneID:107793296
GeneID:107769068
GeneID:107775389
GeneID:107776701
GeneID:107782638
GeneID:107769069
GeneID:107814985
GeneID:107808872
GeneID:107765413
GeneID:107804171
GeneID:107822302
GeneID:107777792
GeneID:107778572
GeneID:107803309
GeneID:107785845
GeneID:107784659
GeneID:107783753
GeneID:107759642
GeneID:107828686
GeneID:107825900
GeneID:107768526
GeneID:107761013
GeneID:107783308
GeneID:107817974
GeneID:107771424
GeneID:107808661
GeneID:107787460
GeneID:107829461
GeneID:107777927
GeneID:107789130
GeneID:107813255
GeneID:107810774
GeneID:107822074
GeneID:107821604
GeneID:107808620
GeneID:107761682
GeneID:107795649
GeneID:107808929
GeneID:107816915
GeneID:107826729
GeneID:107821185
GeneID:107832090
GeneID:107792541
GeneID:107831700
GeneID:107777747
GeneID:107766270
GeneID:107775616
GeneID:107776131
GeneID:107788940
GeneID:107775369
GeneID:107780667
GeneID:107780733
GeneID:107769059
GeneID:107776552
GeneID:107768421
GeneID:107762647
GeneID:107819082
GeneID:107815223
GeneID:107818291
GeneID:107813362
GeneID:107830006
GeneID:107768942
GeneID:107828282
GeneID:107793525
GeneID:107814026
GeneID:107825989
GeneID:107762478
GeneID:107778760
GeneID:107790800
GeneID:107765589
GeneID:107793682
GeneID:107801550
GeneID:107780283
GeneID:107794750
GeneID:107824491
GeneID:107798306
GeneID:107777326
GeneID:107781150
GeneID:107770879
GeneID:107826327
GeneID:107792921
GeneID:107823175
GeneID:107778200
GeneID:107796484
GeneID:107799324
GeneID:107764159
GeneID:107827878
GeneID:107817967
GeneID:107804014
GeneID:107769803
GeneID:107811655
GeneID:107774635
GeneID:107799313
GeneID:107796013
GeneID:107805660
GeneID:107780804
GeneID:107775010
GeneID:107830854
GeneID:107760706
GeneID:107826056
GeneID:107818555
GeneID:107785730
GeneID:107816248
GeneID:107779794
GeneID:107763033
GeneID:107829807
GeneID:107817609
GeneID:107798258
GeneID:107760750
GeneID:107815179
GeneID:107794513
GeneID:107796557
GeneID:107818354
GeneID:107808191
GeneID:107783292
GeneID:107782454
GeneID:107762117
GeneID:107815983
GeneID:107786765
GeneID:107804123
GeneID:107805176
GeneID:107788403
GeneID:107822354
GeneID:107793304
GeneID:107787429
GeneID:107801136
GeneID:107786502
GeneID:107788132
GeneID:107778409
GeneID:107818687
GeneID:107832668
GeneID:107771400
GeneID:107760572
GeneID:107784382
GeneID:107803985
GeneID:107771374
GeneID:107823225
GeneID:107827369
GeneID:107814713
GeneID:107803633
GeneID:107832272
GeneID:107825027
GeneID:107787956
GeneID:107798381
GeneID:107823535
GeneID:107817791
GeneID:107814471
GeneID:107795202
GeneID:107823445
GeneID:107797500
GeneID:107772423
GeneID:107787978
GeneID:107783493
GeneID:107769399
GeneID:107827611
GeneID:107758921
GeneID:107799034
GeneID:107776243
GeneID:107817313
GeneID:107759812
GeneID:107808242
GeneID:107830674
GeneID:107809014
GeneID:107799175
GeneID:107791261
GeneID:107783365
GeneID:107801695
GeneID:107780186
GeneID:107815304
GeneID:107768344
GeneID:107769285
GeneID:107814317
GeneID:107813982
GeneID:107768802
GeneID:107793048
GeneID:107786214
GeneID:107806617
GeneID:107777163
GeneID:107827065
GeneID:107779723
GeneID:107780567
GeneID:107794736
GeneID:107775584
GeneID:107814765
GeneID:107804064
GeneID:107791500
GeneID:107789600
GeneID:107760178
GeneID:107761395
GeneID:107823686
GeneID:107832506
GeneID:107774295
GeneID:107832698
GeneID:107814809
GeneID:107818533
GeneID:107788171
GeneID:107807356
GeneID:107792010
GeneID:107781984
GeneID:107762692
GeneID:107798219
GeneID:107768359
GeneID:107789868
GeneID:107763405
GeneID:107815049
GeneID:107828469
GeneID:107803603
GeneID:107805433
GeneID:107813369
GeneID:107802662
GeneID:107765021
GeneID:107803672
GeneID:107802794
GeneID:107798312
GeneID:107794544
GeneID:107785275
GeneID:107789429
GeneID:107783485
GeneID:107806586
GeneID:107825752
GeneID:107822317
GeneID:107767148
GeneID:107794990
GeneID:107761369
GeneID:107799110
GeneID:107826239
GeneID:107830263
GeneID:107769674
GeneID:107768744
GeneID:107798826
GeneID:107766184
GeneID:107771129
GeneID:107828723
GeneID:107795386
GeneID:107813122
GeneID:107764440
GeneID:107799707
GeneID:107828116
GeneID:107768126
GeneID:107803195
GeneID:107781932
GeneID:107819712
GeneID:107759723
GeneID:107825941
GeneID:107780205
GeneID:107771177
GeneID:107759179
GeneID:107774252
GeneID:107788307
GeneID:107760891
GeneID:107801268
GeneID:107818690
GeneID:107810577
GeneID:107767738
GeneID:107789537
GeneID:107774287
GeneID:107811096
GeneID:107799106
GeneID:107773445
GeneID:107771956
GeneID:107830983
GeneID:107798500
GeneID:107765408
GeneID:107793215
GeneID:107780374
GeneID:107807082
GeneID:107775639
GeneID:107829024
GeneID:107770689
GeneID:107778737
GeneID:107787047
GeneID:107781581
GeneID:107805117
GeneID:107823852
GeneID:107827015
GeneID:107787598
GeneID:107811858
GeneID:107814193
GeneID:107803357
GeneID:107784262
GeneID:107770537
GeneID:107811058
GeneID:107820562
GeneID:107802594
GeneID:107783944
GeneID:107814237
GeneID:107788365
GeneID:107761590
GeneID:107794457
GeneID:107798858
GeneID:107830922
GeneID:107825292
GeneID:107800303
GeneID:107810881
GeneID:107786410
GeneID:107815824
GeneID:107779663
GeneID:107823789
GeneID:107803984
GeneID:107797877
GeneID:107790926
GeneID:107829841
GeneID:107789522
GeneID:107772124
GeneID:107826284
GeneID:107793207
GeneID:107809702
GeneID:107790845
GeneID:107830655
GeneID:107773505
GeneID:107796523
GeneID:107821966
GeneID:107821559
GeneID:107785586
GeneID:107766603
GeneID:107776272
GeneID:107793492
GeneID:107781068
GeneID:107814461
GeneID:107774327
GeneID:107774692
GeneID:107814357
GeneID:107830802
GeneID:107789426
GeneID:107800462
GeneID:107822067
GeneID:107822499
GeneID:107829077
GeneID:107769285
GeneID:107782840
GeneID:107805958
GeneID:107796715
GeneID:107806446
GeneID:107827312
GeneID:107764258
GeneID:107827773
GeneID:107818175
GeneID:107771470
GeneID:107817087
GeneID:107803314
GeneID:107790713
GeneID:107828579
GeneID:107783296
GeneID:107775123
GeneID:107782250
GeneID:107818821
GeneID:107798951
GeneID:107764808
GeneID:107806620
GeneID:107804197
GeneID:107775984
GeneID:107761870
GeneID:107769219
GeneID:107803313
GeneID:107812584
GeneID:107770822
GeneID:107794416
GeneID:107808025
GeneID:107803241
GeneID:107767566
GeneID:107814371
GeneID:107783693
GeneID:107822500
GeneID:107770380
GeneID:107798468
GeneID:107801758
GeneID:107824634
GeneID:107800041
GeneID:107763479
GeneID:107774722
GeneID:107815743
GeneID:107792828
GeneID:107809228
GeneID:107826367
GeneID:107826425
GeneID:107779087
GeneID:107795937
GeneID:107822791
GeneID:107767090
GeneID:107826800
GeneID:107763462
GeneID:107814317
GeneID:107815448
GeneID:107801723
GeneID:107776986
GeneID:107759328
GeneID:107806550
GeneID:107814404
GeneID:107778769
GeneID:107812179
GeneID:107766742
GeneID:107788656
GeneID:107822925
GeneID:107801769
GeneID:107762284
GeneID:107809801
GeneID:107760083
GeneID:107798013
GeneID:107822933
GeneID:107785339
GeneID:107808755
GeneID:107805155
GeneID:107770936
GeneID:107762997
GeneID:107822846
GeneID:107768302
GeneID:107811709
GeneID:107781916
GeneID:107776628
GeneID:107791028
GeneID:107812520
GeneID:107769382
GeneID:107776117
GeneID:107787493
GeneID:107775640
GeneID:107778398
GeneID:107801118
GeneID:107828185
GeneID:107786130
GeneID:107808210
GeneID:107762151
GeneID:107795811
GeneID:107768236
GeneID:107808814
GeneID:107776343
GeneID:107815174
GeneID:107768586
GeneID:107817079
GeneID:107780799
GeneID:107784098
GeneID:107768738
GeneID:107801564
GeneID:107770931
GeneID:107803437
GeneID:107803233
GeneID:107763849
GeneID:107781172
GeneID:107801917
GeneID:107773770
GeneID:107822910
GeneID:107813542
GeneID:107821126
GeneID:107816774
GeneID:107829079
GeneID:107764111
GeneID:107798297
GeneID:107760339
GeneID:107818301
GeneID:107824877
GeneID:107793837
GeneID:107818650
GeneID:107804881
GeneID:107813689
GeneID:107788482
GeneID:107785171
GeneID:107760226
GeneID:107803625
GeneID:107773043
GeneID:107809064
GeneID:107822243
GeneID:107818236
GeneID:107829589
GeneID:107827304
GeneID:107773450
GeneID:107805684
GeneID:107806553
GeneID:107767029
GeneID:107774337
GeneID:107777521
GeneID:107759377
GeneID:107796677
GeneID:107768788
GeneID:107777569
GeneID:107821508
GeneID:107765580
GeneID:107790625
GeneID:107809742
GeneID:107779723
GeneID:107798254
GeneID:107807256
GeneID:107816526
GeneID:107795775
GeneID:107799450
GeneID:107801049
GeneID:107782364
GeneID:107779369
GeneID:107776464
GeneID:107789986
GeneID:107797859
GeneID:107816085
GeneID:107820655
GeneID:107768374
GeneID:107762319
GeneID:107799360
GeneID:107765344
GeneID:107818053
GeneID:107783788
GeneID:107804509
GeneID:107832567
GeneID:107817219
GeneID:107815810
GeneID:107799686
GeneID:107816513
GeneID:107820723
GeneID:107805315
GeneID:107784753
GeneID:107793677
GeneID:107789985
GeneID:107830897
GeneID:107760024
GeneID:107798135
GeneID:107805460
GeneID:107813318
GeneID:107776906
GeneID:107831077
GeneID:107788521
GeneID:107797122
GeneID:107823406
GeneID:107785483
GeneID:107810267
GeneID:107793340
GeneID:107821892
GeneID:107796905
GeneID:107774953
GeneID:107803331
GeneID:107759151
GeneID:107818154
GeneID:107767716
GeneID:107788194
GeneID:107810746
GeneID:107789678
GeneID:107779610
GeneID:107760677
GeneID:107801330
GeneID:107769866
GeneID:107829416
GeneID:107828736
GeneID:107778341
GeneID:107766584
GeneID:107795206
GeneID:107821453
GeneID:107764727
GeneID:107807699
GeneID:107767529
GeneID:107818807
GeneID:107780367
GeneID:107770112
GeneID:107775596
GeneID:107803883
GeneID:107794882
GeneID:107812970
GeneID:107801901
GeneID:107816991
GeneID:107822103
GeneID:107824597
GeneID:107763910
GeneID:107812062
GeneID:107775304
GeneID:107783593
GeneID:107829347
GeneID:107814851
GeneID:107784382
GeneID:107779473
GeneID:107759075
GeneID:107760110
GeneID:107799924
GeneID:107764147
GeneID:107810931
GeneID:107785415
GeneID:107813108
GeneID:107765204
GeneID:107802191
GeneID:107789228
GeneID:107811976
GeneID:107776073
GeneID:107782965
GeneID:107777660
GeneID:107782113
GeneID:107778106
GeneID:107794120
GeneID:107822377
GeneID:107795171
GeneID:107822060
GeneID:107794681
GeneID:107763791
GeneID:107809000
GeneID:107797888
GeneID:107777405
GeneID:107828062
GeneID:107815397
GeneID:107777754
GeneID:107770686
GeneID:107826424
GeneID:107808695
GeneID:107799376
GeneID:107820604
GeneID:107809396
GeneID:107831283
GeneID:107810138
GeneID:107782115
GeneID:107799584
GeneID:107821019
GeneID:107782872
GeneID:107812788
GeneID:107783185
GeneID:107817140
GeneID:107780643
GeneID:107771057
GeneID:107815153
GeneID:107777234
GeneID:107794394
GeneID:107799468
GeneID:107816403
GeneID:107799788
GeneID:107776492
GeneID:107831113
GeneID:107766552
GeneID:107800991
GeneID:107824279
GeneID:107787597
GeneID:107817826
GeneID:107809932
GeneID:107779715
GeneID:107777672
GeneID:107824484
GeneID:107827810
GeneID:107782651
GeneID:107759791
GeneID:107788393
GeneID:107776906
GeneID:107808536
GeneID:107804940
GeneID:107766474
GeneID:107774878
GeneID:107805259
GeneID:107794290
GeneID:107773132
GeneID:107764804
GeneID:107773733
GeneID:107768997
GeneID:107767135
GeneID:107811137
GeneID:107759081
GeneID:107788859
GeneID:107779007
GeneID:107814007
GeneID:107774014
GeneID:107770659
GeneID:107825760
GeneID:107822385
GeneID:107832343
GeneID:107767965
GeneID:107765126
GeneID:107805684
GeneID:107766430
GeneID:107815027
GeneID:107776974
GeneID:107782954
GeneID:107811312
GeneID:107817448
GeneID:107814276
GeneID:107762067
GeneID:107790974
GeneID:107821085
GeneID:107806214
GeneID:107767586
GeneID:107825972
GeneID:107771128
GeneID:107783239
GeneID:107792495
GeneID:107764070
GeneID:107826230
GeneID:107788240
GeneID:107759759
GeneID:107804458
GeneID:107797595
GeneID:107807154
GeneID:107819381
GeneID:107827399
GeneID:107819506
GeneID:107783648
GeneID:107773385
GeneID:107793749
GeneID:107765935
GeneID:107781299
GeneID:107786980
GeneID:107808960
GeneID:107803606
GeneID:107772203
GeneID:107819338
GeneID:107819591
GeneID:107792701
GeneID:107760598
GeneID:107805171
GeneID:107774180
GeneID:107788085
GeneID:107799608
GeneID:107771970
GeneID:107785841
GeneID:107796787
GeneID:107823086
GeneID:107805962
GeneID:107767286
GeneID:107800136
GeneID:107816821
GeneID:107820117
GeneID:107822292
GeneID:107772508
GeneID:107784011
GeneID:107761868
GeneID:107819255
GeneID:107810100
GeneID:107823032
GeneID:107797733
GeneID:107819037
GeneID:107801801
GeneID:107761175
GeneID:107788859
GeneID:107797065
GeneID:107765580
GeneID:107774073
GeneID:107782104
GeneID:107821815
GeneID:107815236
GeneID:107774476
GeneID:107780548
GeneID:107786215
GeneID:107824366
GeneID:107807235
GeneID:107807208
GeneID:107775648
GeneID:107801707
GeneID:107804699
GeneID:107782790
GeneID:107808160
GeneID:107795478
GeneID:107771605
GeneID:107763356
GeneID:107785687
GeneID:107821836
GeneID:107817260
GeneID:107760155
GeneID:107767083
GeneID:107815559
GeneID:107782773
GeneID:107814980
GeneID:107782371
GeneID:107796414
GeneID:107812666
GeneID:107822471
GeneID:107810598
GeneID:107818246
GeneID:107810872
GeneID:107806111
GeneID:107830994
GeneID:107803494
GeneID:107818508
GeneID:107803669
GeneID:107814145
GeneID:107771021
GeneID:107798286
GeneID:107795494
GeneID:107769538
GeneID:107809767
GeneID:107780329
GeneID:107780250
GeneID:107813633
GeneID:107830416
GeneID:107826487
GeneID:107788104
GeneID:107775731
GeneID:107812854
GeneID:107770976
GeneID:107811503
GeneID:107812270
GeneID:107779896
GeneID:107786544
GeneID:107761872
GeneID:107774225
GeneID:107759039
GeneID:107830822
GeneID:107802228
GeneID:107760255
GeneID:107777871
GeneID:107809747
GeneID:107813265
GeneID:107808270
GeneID:107831418
GeneID:107799508
GeneID:107763513
GeneID:107829597
GeneID:107763461
GeneID:107782872
GeneID:107772612
GeneID:107802821
GeneID:107784083
GeneID:107759237
GeneID:107787073
GeneID:107813470
GeneID:107788538
GeneID:107802405
GeneID:107784297
GeneID:107797222
GeneID:107796714
GeneID:107760475
GeneID:107773422
GeneID:107779604
GeneID:107826861
GeneID:107772468
GeneID:107797968
GeneID:107804105
GeneID:107796971
GeneID:107788534
GeneID:107797640
GeneID:107787063
GeneID:107817470
GeneID:107781785
GeneID:107793113
GeneID:107761232
GeneID:107778101
GeneID:107816704
GeneID:107827618
GeneID:107774050
GeneID:107821521
GeneID:107767528
GeneID:107779466
GeneID:107764242
GeneID:107824751
GeneID:107804703
GeneID:107819674
GeneID:107823021
GeneID:107827168
GeneID:107811767
GeneID:107807164
GeneID:107831383
GeneID:107798540
GeneID:107813690
GeneID:107778059
GeneID:107800585
GeneID:107827345
GeneID:107803724
GeneID:107807186
GeneID:107759747
GeneID:107790125
GeneID:107793441
GeneID:107805341
GeneID:107792959
GeneID:107791556
GeneID:107765905
GeneID:107783440
GeneID:107762476
GeneID:107817373
GeneID:107832769
GeneID:107802851
GeneID:107818048
GeneID:107828341
GeneID:107827245
GeneID:107818292
GeneID:107789025
GeneID:107780319
GeneID:107792549
GeneID:107760083
GeneID:107808072
GeneID:107791146
GeneID:107790981
GeneID:107765036
GeneID:107827488
GeneID:107770299
GeneID:107825576
GeneID:107800520
GeneID:107794124
GeneID:107810012
GeneID:107805962
GeneID:107773598
GeneID:107760950
GeneID:107793187
GeneID:107788959
GeneID:107769310
GeneID:107827758
GeneID:107805395
GeneID:107823096
GeneID:107798281
GeneID:107818556
GeneID:107809706
GeneID:107806338
GeneID:107816249
GeneID:107830228
GeneID:107818780
GeneID:107797519
GeneID:107770620
GeneID:107820529
GeneID:107827388
GeneID:107774799
GeneID:107770391
GeneID:107785986
GeneID:107819205
GeneID:107819316
GeneID:107790029
GeneID:107804026
GeneID:107819005
GeneID:107815521
GeneID:107822241
GeneID:107819075
GeneID:107777600
GeneID:107794811
GeneID:107803258
GeneID:107778999
GeneID:107771247
GeneID:107766896
GeneID:107807163
GeneID:107799143
GeneID:107772889
GeneID:107786101
GeneID:107806364
GeneID:107792967
GeneID:107770294
GeneID:107813431
GeneID:107767726
GeneID:107787089
GeneID:107805444
GeneID:107789344
GeneID:107763183
GeneID:107798788
GeneID:107812249
GeneID:107759513
GeneID:107805431
GeneID:107771474
GeneID:107804619
GeneID:107822647
GeneID:107763626
GeneID:107804930
GeneID:107827017
GeneID:107812924
GeneID:107787989
GeneID:107792493
GeneID:107771184
GeneID:107788950
GeneID:107803995
GeneID:107831129
GeneID:107777958
GeneID:107781818
GeneID:107800735
GeneID:107791675
GeneID:107808788
GeneID:107774599
GeneID:107793503
GeneID:107799700
GeneID:107777930
GeneID:107822013
GeneID:107800056
GeneID:107808649
GeneID:107796099
GeneID:107820886
GeneID:107790558
GeneID:107806714
GeneID:107778160
GeneID:107768257
GeneID:107818260
GeneID:107799531
GeneID:107791104
GeneID:107831063
GeneID:107784058
GeneID:107760121
GeneID:107810932
GeneID:107807396
GeneID:107779699
GeneID:107806944
GeneID:107780536
GeneID:107777346
GeneID:107759763
GeneID:107762595
GeneID:107798995
GeneID:107769333
GeneID:107823569
GeneID:107778359
GeneID:107766450
GeneID:107785159
GeneID:107824751
GeneID:107771689
GeneID:107769425
GeneID:107822134
GeneID:107823129
GeneID:107813385
GeneID:107794413
GeneID:107806744
GeneID:107804165
GeneID:107809824
GeneID:107800255
GeneID:107821092
GeneID:107780089
GeneID:107769967
GeneID:107793450
GeneID:107822295
GeneID:107808236
GeneID:107767598
GeneID:107779379
GeneID:107800542
GeneID:107776087
GeneID:107796745
GeneID:107767367
GeneID:107769508
GeneID:107805157
GeneID:107822614
GeneID:107772365
GeneID:107808088
GeneID:107797670
GeneID:107797067
GeneID:107826126
GeneID:107776043
GeneID:107793601
GeneID:107781389
GeneID:107827462
GeneID:107799911
GeneID:107800985
GeneID:107786562
GeneID:107819526
GeneID:107782501
GeneID:107815837
GeneID:107812033
GeneID:107787225
GeneID:107829481
GeneID:107826686
GeneID:107816033
GeneID:107804512
GeneID:107820284
GeneID:107775165
GeneID:107779740
GeneID:107827992
GeneID:107808260
GeneID:107803594
GeneID:107785193
GeneID:107767155
GeneID:107775807
GeneID:107769260
GeneID:107811996
GeneID:107768106
GeneID:107781735
GeneID:107768484
GeneID:107803526
GeneID:107783900
GeneID:107783061
GeneID:107794310
GeneID:107829529
GeneID:107818540
GeneID:107802904
GeneID:107799493
GeneID:107809645
GeneID:107818947
GeneID:107827795
GeneID:107785370
GeneID:107767930
GeneID:107768926
GeneID:107776749
GeneID:107807060
GeneID:107799733
GeneID:107805373
GeneID:107830777
GeneID:107767795
GeneID:107825067
GeneID:107785392
GeneID:107832395
GeneID:107808390
GeneID:107782346
GeneID:107823876
GeneID:107788949
GeneID:107826294
GeneID:107821200
GeneID:107776484
GeneID:107800203
GeneID:107821284
GeneID:107796068
GeneID:107804593
GeneID:107794538
GeneID:107765958
GeneID:107807386
GeneID:107817199
GeneID:107826102
GeneID:107780400
GeneID:107785510
GeneID:107784677
GeneID:107823767
GeneID:107826242
GeneID:107812190
GeneID:107765441
GeneID:107799855
GeneID:107822114
GeneID:107800713
GeneID:107825805
GeneID:107815536
GeneID:107788727
GeneID:107761714
GeneID:107830388
GeneID:107819363
GeneID:107814255
GeneID:107779269
GeneID:107782667
GeneID:107784152
GeneID:107819667
GeneID:107800470
GeneID:107782287
GeneID:107807677
GeneID:107788536
GeneID:107812789
GeneID:107792496
GeneID:107780696
GeneID:107816704
GeneID:107803889
GeneID:107828343
GeneID:107778619
GeneID:107771125
GeneID:107809748
GeneID:107806585
GeneID:107826735
GeneID:107814905
GeneID:107770893
GeneID:107782325
GeneID:107787097
GeneID:107777984
GeneID:107788290
GeneID:107785809
GeneID:107827849
GeneID:107778537
GeneID:107827241
GeneID:107829591
GeneID:107767370
GeneID:107785002
GeneID:107794614
GeneID:107801017
GeneID:107776720
GeneID:107779764
GeneID:107759202
GeneID:107766483
GeneID:107776483
GeneID:107768957
GeneID:107825144
GeneID:107821769
GeneID:107811354
GeneID:107777450
GeneID:107788538
GeneID:107829212
GeneID:107828671
GeneID:107765712
GeneID:107765173
GeneID:107800048
GeneID:107816269
GeneID:107813369
GeneID:107764314
GeneID:107778845
GeneID:107827574
GeneID:107803594
GeneID:107781316
GeneID:107804300
GeneID:107763441
GeneID:107812789
GeneID:107813041
GeneID:107771052
GeneID:107831137
GeneID:107785310
GeneID:107789971
GeneID:107798499
GeneID:107811924
GeneID:107810684
GeneID:107768940
GeneID:107776019
GeneID:107828765
GeneID:107825983
GeneID:107803827
GeneID:107784307
GeneID:107805563
GeneID:107778997
GeneID:107793921
GeneID:107805881
GeneID:107794222
GeneID:107810549
GeneID:107797995
GeneID:107800663
GeneID:107811336
GeneID:107798936
GeneID:107811018
GeneID:107819315
GeneID:107817391
GeneID:107794282
GeneID:107802992
GeneID:107763291
GeneID:107809768
GeneID:107823207
GeneID:107788311
GeneID:107804889
GeneID:107761144
GeneID:107805418
GeneID:107826139
GeneID:107806963
GeneID:107787264
GeneID:107814879
GeneID:107761091
GeneID:107832258
GeneID:107792534
GeneID:107790771
GeneID:107827374
GeneID:107791697
GeneID:107765147
GeneID:107763253
GeneID:107832608
GeneID:107818566
GeneID:107799095
GeneID:107785570
GeneID:107796299
GeneID:107816107
GeneID:107818021
GeneID:107770824
GeneID:107793294
GeneID:107819788
GeneID:107768416
GeneID:107825217
GeneID:107806049
GeneID:107829141
GeneID:107776475
GeneID:107785969
GeneID:107798877
GeneID:107786049
GeneID:107768286
GeneID:107787561
GeneID:107794095
GeneID:107823359
GeneID:107810200
GeneID:107830148
GeneID:107811021
GeneID:107798791
GeneID:107801975
GeneID:107794486
GeneID:107813415
GeneID:107832007
GeneID:107777862
GeneID:107796028
GeneID:107764380
GeneID:107795929
GeneID:107813935
GeneID:107767326
GeneID:107811058
GeneID:107803298
GeneID:107796197
GeneID:107809977
GeneID:107791053
GeneID:107803095
GeneID:107759987
GeneID:107771980
GeneID:107814906
GeneID:107790748
GeneID:107781104
GeneID:107829671
GeneID:107766753
GeneID:107784330
GeneID:107776004
GeneID:107800510
GeneID:107797756
GeneID:107815415
GeneID:107807861
GeneID:107816151
GeneID:107782293
GeneID:107759103
GeneID:107802666
GeneID:107797840
GeneID:107763449
GeneID:107817970
GeneID:107758906
GeneID:107787843
GeneID:107766006
GeneID:107780952
GeneID:107788922
GeneID:107818426
GeneID:107760826
GeneID:107773765
GeneID:107821451
GeneID:107824254
GeneID:107799344
GeneID:107819783
GeneID:107815270
GeneID:107799818
GeneID:107816325
GeneID:107812567
GeneID:107804766
GeneID:107817646
GeneID:107795958
GeneID:107795918
GeneID:107760644
GeneID:107806800
GeneID:107831882
GeneID:107811094
GeneID:107767614
GeneID:107822424
GeneID:107815351
GeneID:107783623
GeneID:107775689
GeneID:107770703
GeneID:107812788
GeneID:107760280
GeneID:107789589
GeneID:107767125
GeneID:107810546
GeneID:107765490
GeneID:107807760
GeneID:107806924
GeneID:107761038
GeneID:107761810
GeneID:107793371
GeneID:107769338
GeneID:107764097
GeneID:107817836
GeneID:107770357
GeneID:107804050
GeneID:107821253
GeneID:107804417
GeneID:107761670
GeneID:107798525
GeneID:107771030
GeneID:107778980
GeneID:107827897
GeneID:107806719
GeneID:107826766
GeneID:107761443
GeneID:107815835
GeneID:107819026
GeneID:107807251
GeneID:107798295
GeneID:107829767
GeneID:107795071
GeneID:107808228
GeneID:107791229
GeneID:107822109
GeneID:107762073
GeneID:107813470
GeneID:107798971
GeneID:107760703
GeneID:107777720
GeneID:107762705
GeneID:107770118
GeneID:107774231
GeneID:107768741
GeneID:107781868
GeneID:107793152
GeneID:107804574
GeneID:107810758
GeneID:107781403
GeneID:107765291
GeneID:107771790
GeneID:107784207
GeneID:107762297
GeneID:107791445
GeneID:107795571
GeneID:107795955
GeneID:107774413
GeneID:107808091
GeneID:107821260
GeneID:107813285
GeneID:107793734
GeneID:107797958
GeneID:107761511
GeneID:107813146
GeneID:107766093
GeneID:107829706
GeneID:107800208
GeneID:107776683
GeneID:107828978
GeneID:107805875
GeneID:107766133
GeneID:107807908
GeneID:107814566
GeneID:107824980
GeneID:107773227
GeneID:107773392
GeneID:107806721
GeneID:107823986
GeneID:107801015
GeneID:107768591
GeneID:107805413
GeneID:107826609
GeneID:107789189
GeneID:107773272
GeneID:107825374
GeneID:107822468
GeneID:107801900
GeneID:107768121
GeneID:107779648
GeneID:107774621
GeneID:107816676
GeneID:107768991
GeneID:107766854
GeneID:107779493
GeneID:107779484
GeneID:107789546
GeneID:107809197
GeneID:107799384
GeneID:107803761
GeneID:107775544
GeneID:107822999
GeneID:107818197
GeneID:107818988
GeneID:107782903
GeneID:107792425
GeneID:107769224
GeneID:107777728
GeneID:107816144
GeneID:107773322
GeneID:107817162
GeneID:107825397
GeneID:107816362
GeneID:107776430
GeneID:107789772
GeneID:107823343
GeneID:107770203
GeneID:107785996
GeneID:107767908
GeneID:107795447
GeneID:107808979
GeneID:107769049
GeneID:107780846
GeneID:107814119
GeneID:107772383
GeneID:107760740
GeneID:107793735
GeneID:107777547
GeneID:107812265
GeneID:107774062
GeneID:107785661
GeneID:107771601
GeneID:107820158
GeneID:107778170
GeneID:107782585
GeneID:107790487
GeneID:107765950
GeneID:107797040
GeneID:107820362
GeneID:107790060
GeneID:107767246
GeneID:107781715
GeneID:107815100
GeneID:107769046
GeneID:107790266
GeneID:107786653
GeneID:107770907
GeneID:107773336
GeneID:107829062
GeneID:107807238
GeneID:107760466
GeneID:107772120
GeneID:107790266
GeneID:107830509
GeneID:107783503
GeneID:107795792
GeneID:107760026
GeneID:107812056
GeneID:107762597
GeneID:107764677
GeneID:107797489
GeneID:107781501
GeneID:107766884
GeneID:107765710
GeneID:107826244
GeneID:107782148
GeneID:107805465
GeneID:107780508
GeneID:107759417
GeneID:107762302
GeneID:107796282
GeneID:107776608
GeneID:107813294
GeneID:107786678
GeneID:107810033
GeneID:107771740
GeneID:107811633
GeneID:107829893
GeneID:107771336
GeneID:107804602
GeneID:107815120
GeneID:107764418
GeneID:107805038
GeneID:107822564
GeneID:107810364
GeneID:107808737
GeneID:107770005
GeneID:107761054
GeneID:107832723
GeneID:107767563
GeneID:107797413
GeneID:107766827
GeneID:107807993
GeneID:107778760
GeneID:107807751
GeneID:107794937
GeneID:107809064
GeneID:107790638
GeneID:107813705
GeneID:107780821
GeneID:107794251
GeneID:107820873
GeneID:107779551
GeneID:107770248
GeneID:107764882
GeneID:107815637
GeneID:107802156
GeneID:107807153
GeneID:107759030
GeneID:107802512
GeneID:107778475
GeneID:107793580
GeneID:107819718
GeneID:107818604
GeneID:107826215
GeneID:107770515
GeneID:107831968
GeneID:107815144
GeneID:107805443
GeneID:107830458
GeneID:107774316
GeneID:107799635
GeneID:107764154
GeneID:107803035
GeneID:107767672
GeneID:107825081
GeneID:107782960
GeneID:107807436
GeneID:107795977
GeneID:107773479
GeneID:107798846
GeneID:107786525
GeneID:107794981
GeneID:107774321
GeneID:107827600
GeneID:107781147
GeneID:107813901
GeneID:107799946
GeneID:107777410
GeneID:107760236
GeneID:107766679
GeneID:107814298
GeneID:107765018
GeneID:107800988
GeneID:107828854
GeneID:107830241
GeneID:107829532
GeneID:107787974
GeneID:107764320
GeneID:107812498
GeneID:107759590
GeneID:107771300
GeneID:107803854
GeneID:107822133
GeneID:107760827
GeneID:107800221
GeneID:107802583
GeneID:107808408
GeneID:107761529
GeneID:107786633
GeneID:107796572
GeneID:107811072
GeneID:107764352
GeneID:107830930
GeneID:107831965
GeneID:107786954
GeneID:107786092
GeneID:107820681
GeneID:107817230
GeneID:107789472
GeneID:107796387
GeneID:107824389
[truncated: 5,835 more rows]
