# Supplementary material for: Integrated Multi-Omics Analyses Reveal That Autophagy-Mediated Cellular Metabolism Is Required for the Initiation of Pollen Germination
Source: Int J Mol Sci. 2023 Oct 9;24(19):15014. doi: 10.3390/ijms241915014 (PMC10573924; doi:10.3390/ijms241915014)
Supplement: Supplementary file 1 [file ijms-24-15014-s001.zip › Supplementary Data S3.xlsx]

## Sheet: ATG2 VS WT
ID	Peak	RT	Count	Mass	Mean ATG2	Mean WT	P Value	Fold Change
1	asparagine 4	14.811,0	31	115	0.314319	0.759743	0.0113331	0.413718
2	asparagine 1	16.4805,0	30	116	0.0813128	0.15771	0.0444435	0.515583
3	Lyxose 2	16.4219,0	31	103	0.0691962	0.124745	0.0229095	0.554702
4	valine	11.2692,0	31	144	0.157684	0.26472	0.0487459	0.595662
5	Lyxose 1	16.2626,0	31	103	0.0268285	0.0501705	0.0263796	0.534746
6	oxoproline	15.0333,0	31	156	0.930463	1.57464	0.0384212	0.590904
7	fructose 1	18.3654,0	22	52	0.00361308	0.00142252	0.0336469	2.53991
8	1-Aminocyclopropanecarboxylic acid	11.2315,0	31	202	0.00647572	0.0142147	0.0188891	0.455566
9	lactic acid	9.3433,0	31	117	0.00921899	0.0150098	0.0361979	0.614197
10	unknown	10.1044,0	31	102	0.0232423	0.0723207	0.0117941	0.321378
11	linoleic acid	21.491,0	31	337	0.0214089	0.0432868	0.0364691	0.494583
12	stearic acid	21.6966,0	31	117	0.0547319	0.115759	0.0278299	0.472808
13	linolenic acid	21.5458,0	31	108	0.0248505	0.053377	0.0299925	0.465567
14	putrescine 2	17.2693,0	31	174	0.00805952	0.0159945	0.0237071	0.503894
15	L-cysteine	15.2794,0	30	220	0.00264179	0.00722181	0.0116076	0.365807
16	glutamic acid	15.911,0	26	246	0.00692872	0.0242654	0.00910582	0.285539
17	2-hydroxy-3-isopropylbutanedioic acid	15.4953,0	31	275	0.0024051	0.00143539	0.0266675	1.67557
18	unknown	18.5293,0	31	160	0.0057846	0.0118897	0.0382087	0.486524
19	Uridine monophosphate	27.5187,0	31	169	0.00567609	0.0145523	0.00668793	0.390049
20	trans-4-hydroxy-L-proline 2	14.9519,0	13	143	0.000267355	5.56016e-10	0.0313726	480841
21	heptadecanoic acid	20.8937,0	31	117	0.000535759	0.00106686	0.026561	0.502181
22	Glucoheptonic acid 3	20.7527,0	31	319	0.0016983	0.00480914	0.00559012	0.35314
23	alpha-D-glucosamine 1-phosphate	18.0335,0	31	218	0.00450135	0.00844022	0.035041	0.533321
24	Maleamate 4	13.9869,0	31	205	0.000333617	0.0012695	0.000418534	0.262794
25	Analyte 468	18.1289,0	31	84	0.00250228	0.00571355	0.0112368	0.437955
26	Ribonic acid, gamma-lactone	16.6197,0	31	160	0.000885214	0.00183595	0.0273738	0.482155
27	fructose-6-phosphate	22.0419,0	29	315	0.000257649	0.00100664	0.00950322	0.25595
28	unknown	18.2147,0	31	263	0.00134972	0.0025678	0.0306051	0.525635
29	d-Glucoheptose 1	20.6944,0	31	319	0.00109791	0.00321781	0.00131303	0.341199
30	unknown	21.926,0	30	306	0.000618895	0.00131904	0.0180503	0.4692
31	D-erythronolactone 2	15.9064,0	31	215	0.015306	0.0325065	0.0207593	0.47086
32	unknown	16.7298,0	14	160	5.54738e-10	0.00615938	0.0491017	9.0064e-08
33	Lyxonic acid, 1,4-lactone	17.2526,0	31	217	0.0434108	0.0908025	0.0218486	0.478079
34	toluenesulfonic acid	16.1238,0	31	229	0.06842	0.161232	0.0118693	0.424358
35	unknown	21.9835,0	31	159	0.00113777	0.0031261	0.0126018	0.363957
36	Analyte 385	16.5598,0	31	231	0.00150796	0.0031239	0.0459635	0.482716
37	N-Acetyltryptophan 4	23.5636,0	31	157	0.000633296	0.00139008	0.0105023	0.455583
38	unknown	14.0376,0	31	117	0.00849868	0.0153664	0.0266835	0.553069
39	unknown	19.0711,0	24	244	0.000177029	0.00528411	0.00689383	0.0335022
40	N(epsilon)-Trimethyllysine	15.5491,0	24	58	0.00457479	0.00191919	0.0174435	2.38371
41	unknown	23.7592,0	21	128	0.00165676	0.000518123	0.00791712	3.19761
42	Analyte 678	22.6947,0	19	103	2.24874e-05	0.00108589	0.0170971	0.0207088
43	Gluconic lactone 1	18.5603,0	14	311	5.54738e-10	0.000492551	0.0410069	1.12626e-06
44	Erythrose 1	14.1628,0	21	117	0.000864874	0.0017596	0.0131623	0.491518
45	Analyte 360	16.103,0	24	217	0.000976841	0.00204404	0.0200559	0.477897
46	unknown	14.4283,0	31	113	0.00417	0.00781807	0.021842	0.53338
47	unknown	15.0152,0	31	314	0.0272981	0.0756352	0.0162811	0.360917
48	unknown	10.8713,0	18	392	0.000480082	5.56016e-10	0.027656	863432
49	resorcinol	13.359,0	28	119	0.000316366	0.000103396	0.0348032	3.05975
50	unknown	17.5295,0	31	257	0.0011415	0.00226859	0.02072	0.503175
51	D-Arabitol	17.0826,0	30	86	0.00346548	0.00724323	0.0171445	0.478445
52	3,4-Dihydroxyphenylacetic acid	18.0871,0	18	174	0.0003278	0.000870593	0.0175876	0.376525
53	Analyte 808	30.6111,0	31	267	0.00262336	0.00126154	0.0137119	2.07949
54	butyraldehyde 2	12.1103,0	31	84	0.247774	0.536354	0.00426871	0.46196
55	Analyte 354	16.0225,0	20	328	0.000376022	1.49648e-05	0.0498631	25.1272
56	Analyte 539	19.6045,0	26	230	6.36437e-05	0.000265435	0.00721787	0.239771
57	Analyte 667	22.4942,0	26	353	0.000301726	0.000827414	0.0168327	0.364661
58	Analyte 724	24.0732,0	23	86	0.000154976	0.000729234	0.00167117	0.212518
59	Analyte 350	15.947,0	31	241	0.00568965	0.0166454	0.00763577	0.341816
60	unknown	11.1418,0	15	226	0.00224457	5.56016e-10	0.0278157	4.03688e+06
61	Analyte 32	9.05237,0	31	102	0.0519097	0.205534	0.0183598	0.25256
62	Analyte 292	14.8911,0	31	217	0.00346073	0.0114913	0.00508271	0.301161
63	Analyte 670	22.5586,0	25	117	0.00111344	0.00401711	0.0125315	0.277175
64	Analyte 671	22.5715,0	31	191	0.00267229	0.00558449	0.0328897	0.478521
65	Analyte 685	22.9819,0	31	217	0.117544	0.228389	0.0299942	0.514667

## Sheet: ATG5 VS WT
ID	Peak	RT	Count	Mass	Mean ATG5	Mean WT	P Value	Fold Change
1	asparagine 4	14.811,0	31	115	0.279725	0.759743	0.00811848	0.368183
2	mannose 2	18.8579,0	31	160	0.191655	0.347796	0.0215966	0.551055
3	asparagine 1	16.4805,0	30	116	0.0792975	0.15771	0.0163696	0.502805
4	glycerol	11.9035,0	31	218	0.133989	0.341028	0.013966	0.392897
5	valine	11.2692,0	31	144	0.124912	0.26472	0.0228673	0.471864
6	aspartic acid 1	14.8401,0	31	232	0.144803	0.44358	0.00804974	0.326442
7	alanine 1	9.88414,0	31	116	0.582413	1.30575	0.021098	0.446037
8	Isoleucine	12.2723,0	31	158	0.0694999	0.123595	0.0190107	0.56232
9	beta-Alanine 2	13.8666,0	31	174	0.00642913	0.0147674	0.0167128	0.435358
10	Lyxose 1	16.2626,0	31	103	0.0256438	0.0501705	0.0145314	0.511133
11	oxoproline	15.0333,0	31	156	0.712537	1.57464	0.00412796	0.452507
12	D-Talose 1	18.6516,0	28	264	0.00854744	0.00256645	0.0344327	3.33045
13	1-Aminocyclopropanecarboxylic acid	11.2315,0	31	202	0.00179212	0.0142147	0.00423093	0.126076
14	unknown	10.1044,0	31	102	0.0218356	0.0723207	0.00917743	0.301928
15	linoleic acid	21.491,0	31	337	0.0177144	0.0432868	0.00542149	0.409233
16	Analyte 42	9.25603,0	31	152	0.0476967	0.0858728	0.0433506	0.555434
17	stearic acid	21.6966,0	31	117	0.0603039	0.115759	0.0363724	0.520943
18	linolenic acid	21.5458,0	31	108	0.0213887	0.053377	0.00488073	0.400711
19	putrescine 2	17.2693,0	31	174	0.0051739	0.0159945	0.000578617	0.32348
20	methionine 1	14.9372,0	31	176	0.0580626	0.147648	0.00620504	0.39325
21	L-cysteine	15.2794,0	30	220	0.0025283	0.00722181	0.00200361	0.350092
22	unknown	18.4879,0	12	555	0.00619742	5.56016e-10	0.0496211	1.11461e+07
23	Pipecolinic acid	13.2304,0	31	156	0.827801	1.71244	0.0195166	0.483404
24	2-hydroxy-3-isopropylbutanedioic acid	15.4953,0	31	275	0.000609744	0.00143539	0.000420948	0.424794
25	unknown	18.5293,0	31	160	0.00510729	0.0118897	0.0257119	0.429557
26	Uridine monophosphate	27.5187,0	31	169	0.00513768	0.0145523	0.000697034	0.35305
27	5'-methylthioadenosine 1	27.1527,0	31	236	0.00130702	0.00238823	0.0423829	0.547275
28	Maleimide	9.99472,0	31	154	0.00848563	0.0157534	0.013604	0.538654
29	unknown	16.192,0	31	204	0.00385306	0.00911989	0.0317367	0.42249
30	Fructose 2,6-biphosphate degr prod 2	21.3668,0	31	227	0.0275626	0.099591	0.0225244	0.276758
31	Sedoheptulose	19.174,0	31	217	0.00680637	0.0142543	0.0424963	0.477497
32	L-homoserine 1	14.0285,0	30	218	0.000602499	0.00150434	0.0146522	0.400506
33	heptadecanoic acid	20.8937,0	31	117	0.000545266	0.00106686	0.0258601	0.511093
34	Analyte 518	19.2806,0	31	217	0.00699955	0.0143307	0.0330328	0.488431
35	3-Hydroxypyridine	10.5818,0	26	152	0.000675343	0.00278744	0.00125473	0.242281
36	ribose	16.6622,0	31	307	0.000190156	0.00058694	0.0209354	0.323979
37	Glucoheptonic acid 3	20.7527,0	31	319	0.00213125	0.00480914	0.00600953	0.443165
38	alpha-D-glucosamine 1-phosphate	18.0335,0	31	218	0.00308938	0.00844022	0.0105503	0.366031
39	Maleamate 4	13.9869,0	31	205	0.000360051	0.0012695	0.00189889	0.283616
40	Analyte 468	18.1289,0	31	84	0.00209518	0.00571355	0.00623776	0.366704
41	phenylalanine 1	16.15,0	28	200	0.013767	0.0526558	0.000633429	0.261452
42	Ribonic acid, gamma-lactone	16.6197,0	31	160	0.000656912	0.00183595	0.0111492	0.357804
43	fructose-6-phosphate	22.0419,0	29	315	0.000489358	0.00100664	0.0343557	0.48613
44	trehalose	26.2592,0	26	191	0.000362214	0.00152533	0.015864	0.237465
45	unknown	18.2147,0	31	263	0.0013146	0.0025678	0.0212079	0.511957
46	d-Glucoheptose 1	20.6944,0	31	319	0.00143775	0.00321781	0.00506937	0.446811
47	Neohesperidin	23.7193,0	31	103	0.0030243	0.0100705	0.0203788	0.300313
48	unknown	17.9051,0	31	103	0.00356587	0.0103054	0.0226009	0.346019
49	D-erythronolactone 2	15.9064,0	31	215	0.00999948	0.0325065	0.006527	0.307615
50	Lyxonic acid, 1,4-lactone	17.2526,0	31	217	0.0275901	0.0908025	0.00705683	0.303847
51	salicin	23.9079,0	20	219	0.000201731	0.00185931	0.0275503	0.108497
52	toluenesulfonic acid	16.1238,0	31	229	0.0703278	0.161232	0.00367605	0.43619
53	unknown	21.9835,0	31	159	0.000968342	0.0031261	0.00885777	0.30976
54	Phytol	21.1844,0	31	143	0.00121285	0.00247962	0.0292648	0.489125
55	unknown	16.7331,0	31	241	0.0151063	0.0361883	0.00210269	0.417434
56	unknown	10.6384,0	31	174	0.00288695	0.00645669	0.012107	0.447126
57	Analyte 385	16.5598,0	31	231	0.000726144	0.0031239	0.010624	0.232448
58	unknown	21.0943,0	31	101	0.00046118	0.00145388	0.0180843	0.317206
59	N-Acetyltryptophan 4	23.5636,0	31	157	0.000399769	0.00139008	0.00576866	0.287588
60	unknown	14.0376,0	31	117	0.00916257	0.0153664	0.0285163	0.596273
61	unknown	19.0711,0	24	244	0.0004433	0.00528411	0.00875474	0.0838931
62	Analyte 306	15.0997,0	31	245	0.00678636	0.0150548	0.00256551	0.450776
63	Analyte 112	11.0076,0	31	147	0.00772256	0.0168011	0.0307061	0.459645
64	Analyte 333	15.6372,0	31	186	0.0581625	0.132382	0.018727	0.439352
65	noradrenaline	20.9318,0	31	241	0.000168584	0.000377582	0.01187	0.446483
66	unknown	14.014,0	31	216	0.00218151	0.00507982	0.0234856	0.429447
67	Erythrose 1	14.1628,0	21	117	0.000101854	0.0017596	0.00134751	0.0578851
68	Analyte 360	16.103,0	24	217	0.000391439	0.00204404	0.000355755	0.191502
69	Analyte 454	17.8898,0	31	174	0.00275513	0.00550391	0.0118983	0.500577
70	unknown	14.4283,0	31	113	0.00190615	0.00781807	0.00463459	0.243814
71	unknown	15.0152,0	31	314	0.0366548	0.0756352	0.0154605	0.484626
72	creatine degr	16.2177,0	14	331	0.000146509	0.00506822	0.0198246	0.0289074
73	unknown	10.8713,0	18	392	0.000496488	5.56016e-10	0.0047869	892938
74	unknown	17.5295,0	31	257	0.000669911	0.00226859	0.00757191	0.295299
75	Analyte 358	16.069,0	31	275	0.000616161	0.00116049	0.020888	0.530948
76	3,4-Dihydroxyphenylacetic acid	18.0871,0	18	174	8.519e-05	0.000870593	0.00302379	0.0978528
77	Analyte 558	20.1588,0	31	174	0.00096367	0.0016359	0.0323285	0.589077
78	butyraldehyde 2	12.1103,0	31	84	0.165469	0.536354	0.00225468	0.308507
79	Analyte 667	22.4942,0	26	353	0.00022525	0.000827414	0.00131261	0.272233
80	Analyte 724	24.0732,0	23	86	7.6137e-05	0.000729234	0.00233747	0.104407
81	unknown	12.5733,0	23	240	0.000184597	0.000669235	0.00403447	0.275833
82	Analyte 205	13.1029,0	31	255	0.001937	0.00359726	0.0313175	0.538467
83	Analyte 350	15.947,0	31	241	0.00492426	0.0166454	0.00556202	0.295834
84	5-Aminovaleric acid 3	16.8461,0	24	282	0.000145281	0.000446425	0.011124	0.325431
85	unknown	11.1418,0	15	226	0.00145225	5.56016e-10	0.0204517	2.61189e+06
86	Analyte 216	13.2538,0	25	164	0.000584333	0.00298881	0.020288	0.195507
87	Analyte 22	8.84493,0	29	204	0.000329849	0.000524326	0.0383633	0.629091
88	Analyte 32	9.05237,0	31	102	0.0637987	0.205534	0.00651595	0.310404
89	Analyte 74	10.052,0	31	116	0.0145705	0.0259461	0.0252847	0.561571
90	Analyte 292	14.8911,0	31	217	0.00324977	0.0114913	0.00443705	0.282803
91	Analyte 308	15.1307,0	31	217	0.0147075	0.0306906	0.00843644	0.479218
92	Analyte 668	22.5083,0	31	204	0.00209159	0.00606637	0.0136122	0.344785
93	Analyte 670	22.5586,0	25	117	0.000487076	0.00401711	0.00949551	0.12125
94	Analyte 671	22.5715,0	31	191	0.00149324	0.00558449	0.00854917	0.267391
95	Analyte 685	22.9819,0	31	217	0.0563949	0.228389	0.00508538	0.246924
96	Analyte 686	23.008,0	31	387	0.0135975	0.0261971	0.0278809	0.519046
